# Supplementary material for: Chronic exposure to odors at naturally occurring concentrations triggers limited plasticity in early stages of Drosophila olfactory processing
Source: eLife. 2023 May 30;12:e85443. doi: 10.7554/eLife.85443 (PMC10229125; doi:10.7554/eLife.85443)
Supplement: Figure 2—source data 1. [file elife-85443-fig2-data1.xlsx]

## Sheet: Sheet1
DL5, depolarization (mV)										DL5, firing rate (spikes/s)
exposure cond.	E2-hexenal, 1e-7				solvent					DL5	E2-hexenal, 1e-7				solvent
n	9	10	11	12	8	7	19	19		n	9	10	11	12	8	7	19	19
stimulus, E2-hexenal (log[conc])	-10	-9	-8	-7	-10	-9	-8	-7		stimulus, E2-hexenal (log[conc])	-10	-9	-8	-7	-10	-9	-8	-7
	16.4644	16.9614	19.9562	25.589	2.3574	6.5148	11.2166	17.5764			59.3215	60.9878	94.981	168.3	2.3329	5.6655	29.6607	111.644
	5.0406	4.5268	18.801	22.6628	5.994	9.3378	13.7487	21.7686			98.6469	82.6501	75.3183	153.969	7.3319	8.3317	39.992	120.309
	14.8866	15.7092	20.2082	25.9138	7.6224	4.4316	22.5401	18.4232			65.6535	76.6513	106.645	171.966	3.3327	35.6595	138.972	80.3173
	14.7946	15.4772	18.5808	24.278	1.7634	13.985	28.5888	12.6552			81.9836	79.6507	118.976	170.299	9.6647	58.6549	181.964	53.6559
	9.4956	12.215	20.7856	22.212	13.845	5.0716	14.1424	26.828			60.3213	75.6515	107.978	120.309	49.99	6.9986	55.9888	165.967
	16.7106	5.639	20.5802	17.1726	6.1372	9.7406	16.5389	24.1964			54.6557	10.6645	109.311	89.6487	8.6649	23.6619	80.3173	114.644
	5.3162	18.7458	10.3118	12.4654	4.4126	12.6666	15.0521	26.979			14.6637	89.6487	42.9914	82.6501	4.3325	37.6591	59.988	213.624
	3.8132	10.3808	14.3324	21.506	8.1196		20.507	21.4668			10.9978	45.6575	62.3209	119.976	12.6641		96.9806	114.311
	6.3898	10.515	20.983	25.407			23.6182	18.2354			19.6627	57.6551	146.971	184.297			166.633	88.9822
		11.8636	20.393	22.599			14.7858	22.3518				54.3225	137.306	144.971			62.9874	187.629
			19.7408	24.9282			15.2953	17.1158					118.976	189.629			70.6525	85.3163
				24.4094			21.4111	20.1346						178.964			129.974	111.978
							13.9463	19.7162									37.3259	126.975
							7.03077	17.0084									92.6481	61.9876
							18.0018	9.6092									88.6489	141.638
							7.70521	22.9032									18.6629	139.639
							17.8945	18.4494									97.6471	61.6543
							20.6565	22.382									106.645	158.635
							21.5824	30.7334									112.311	227.954
VM7, depolarization (mV)
exposure cond.	2-butanone, 1e-4				solvent
n	11	12	13	12	16	13	14	11
stimulus, 2-butanone (log[conc])	-7	-6	-5	-4	-7	-6	-5	-4
	23.5412	32.4798	38.609	37.9208	12.519	7.5228	27.71	31.3052
	10.4244	17.833	31.7554	35.9364	13.9612	12.9202	23.3158	21.9522
	21.1454	30.3376	30.4524	32.2098	7.9172	11.0298	20.1624	23.8044
	17.9056	20.8804	26.2866	23.3932	12.3416	11.4152	26.215	28.0066
	19.2224	19.1574	30.4982	36.379	11.0752	10.3106	25.4382	32.054
	13.6924	22.5074	28.014	27.5502	7.4598	14.0628	26.4954	27.2876
	13.5172	13.9674	31.3656	32.2508	16.3308	11.7518	30.4008	31.823
	15.4274	25.7448	28.227	38.9806	15.8842	17.67	29.1278	26.1112
	11.9078	16.0708	19.7422	32.3068	10.7702	16.7404	24.1144	23.5666
	15.5572	15.5278	29.6122	27.567	13.7062	14.3466	26.1036	21.8444
	11.0714	20.4898	24.7044	33.3412	11.0324	23.9538	21.8164	29.3192
		15.4298	34.0072	31.8568	8.6936	18.3456	26.8932
			26.4492		13.0482	19.5798	22.7138
					11.8336		29.7222
					16.5838
					10.5282
VA6, depolarization (mV)										VA6, firing rate (spikes/s)
exposure cond.	geranyl acetate, 1e-4				solvent					exposure cond.	geranyl acetate, 1e-4				solvent
n	7	9	9	8	10	11	11	8		n	7	9	9	8	10	11	11	8
stimulus, geranyl acetate (log[conc])	-7	-6	-5	-4	-7	-6	-5	-4		stimulus, geranyl acetate (log[conc])	-7	-6	-5	-4	-7	-6	-5	-4
	9.1548	19.404	25.1446	29.3322	2.9566	9.51	21.0072	53.1428			1.6665	18.6648	28.4972	50.6616	-0.5	2.8331	23.4977	114.655
	8.5888	14.1682	37.2612	41.1798	10.7818	13.7694	37.4936	26.2416			12.8321	2.3331	57.8276	91.8242	0.9999	8.3325	64.4936	62.8271
	16.5252	4.2568	15.6224	19.0844	9.6622	11.4316	21.6682	21.226			26.3307	4.9995	39.1628	46.1621	6.1661	7.166	24.1643	32.1635
	16.9216	7.2666	15.1438	19.4204	15.1224	7.9568	12.1214	20.5926			36.9963	5.3328	23.4977	33.9966	12.3321	9.3324	12.1655	68.3265
	4.5824	11.9118	12.156	18.5538	20.798	6.084	13.2124	24.6486			4.6662	13.832	30.497	41.3292	35.4965	4.3329	16.9983	50.6616
	8.975	8.895	14.0528	24.5642	4.7908	12.4594	17.221	29.3724			13.9986	10.1657	31.8302	54.6612	1.8332	20.1647	44.9955	73.826
	27.527	17.7996	19.5214	38.8302	11.9314	11.1308	18.0052	23.895			42.1625	35.1632	43.9956	62.4938	18.9981	12.3321	35.1632	59.994
		18.559	17.5588	26.0144	14.2012	11.0766	37.4398	35.936				29.3304	61.3272	41.8292	12.1655	7.3326	74.9925	88.6578
		25.1476	28.7044		14.6904	20.9532	22.7406					30.8303	47.4953		12.4988	37.9962	36.663
					21.1446	16.6818	22.5916								38.8295	26.8307	29.4971
						17.8776	23.3314									19.4981	55.1612
