# Supplementary material for: Chronic exposure to odors at naturally occurring concentrations triggers limited plasticity in early stages of Drosophila olfactory processing
Source: eLife. 2023 May 30;12:e85443. doi: 10.7554/eLife.85443 (PMC10229125; doi:10.7554/eLife.85443)
Supplement: Figure 3—source data 1. [file elife-85443-fig3-data1.xlsx]

## Sheet: Sheet1
VM7, depolarization (mV)
exposure cond.	E2-hexenal, 1e-7				solvent
n	6	8	7	5	16	13	14	11
stimulus, 2-butanone (log[conc])	-7	-6	-5	-4	-7	-6	-5	-4
	24.9052	35.9396	39.5666	37.8168	12.519	7.5228	27.71	31.3052
	9.2404	13.283	19.5536	22.2836	13.9612	12.9202	23.3158	21.9522
	18.1998	26.5366	23.0402	26.2506	7.9172	11.0298	20.1624	23.8044
	9.3186	6.8128	15.5746	21.6264	12.3416	11.4152	26.215	28.0066
	15.252	8.5766	23.2076	36.195	11.0752	10.3106	25.4382	32.054
	21.0802	19.4704	28.0098		7.4598	14.0628	26.4954	27.2876
		29.0756	32.842		16.3308	11.7518	30.4008	31.823
		29.0266			15.8842	17.67	29.1278	26.1112
					10.7702	16.7404	24.1144	23.5666
					13.7062	14.3466	26.1036	21.8444
					11.0324	23.9538	21.8164	29.3192
					8.6936	18.3456	26.8932
					13.0482	19.5798	22.7138
					11.8336		29.7222
					16.5838
					10.5282
VM7, hyperpolarization (mV)											VM7, hyperpolarization (mV)
exposure cond.	E2-hexenal, 1e-7				solvent						2-butanone, 1e-4				solvent
n	6	8	7	5	16	13	14	11			11	12	13	12	16	13	14	11
stimulus, 2-butanone (log[conc])	-7	-6	-5	-4	-7	-6	-5	-4			-7	-6	-5	-4	-7	-6	-5	-4
	-5.36765	-7.0351	-10.69	-23.3721	-4.1818	-1.50195	-6.9234	-12.124			-6.3893	-13.3035	-14.721	-2.11785	-4.1818	-1.50195	-6.9234	-12.124
	-5.01275	-3.52965	-19.7666	-10.4831	-0.81115	-1.7808	-3.10875	-7.77865			-4.96915	-4.9664	-2.6948	-21.188	-0.81115	-1.7808	-3.10875	-7.77865
	-10.806	-4.1565	-20.5606	-13.7359	-3.9127	-0.45825	-3.8843	-9.88485			-5.64285	-6.15465	-14.5793	-8.3183	-3.9127	-0.45825	-3.8843	-9.88485
	-12.9341	-5.8902	-8.08795	-19.0717	-2.92875	-1.9418	-3.00715	-7.50275			-0.44865	-2.5515	-4.79635	-8.8105	-2.92875	-1.9418	-3.00715	-7.50275
	-7.51785	-17.109	-12.388	-12.2324	-2.7794	-3.2479	1.0387	-3.85775			-3.8649	-3.92525	1.4964	-8.3741	-2.7794	-3.2479	1.0387	-3.85775
	-4.1248	-9.57105	-14.4145	-24.9861	-4.48695	-6.20625	-9.2653	-10.8085			-3.9146	-4.6685	-2.9282	-4.65615	-4.48695	-6.20625	-9.2653	-10.8085
		-4.1699	-20.0354		-4.3254	-3.6143	-3.9408	-10.1054			-3.78825	-4.326	-8.2341	-5.4453	-4.3254	-3.6143	-3.9408	-10.1054
		-12.3911			-4.89415	-2.97905	-3.97845	-10.9401			-4.59395	-6.19535	-4.5176	-2.41035	-4.89415	-2.97905	-3.97845	-10.9401
					-5.872	-2.8758	-6.88565	-13.7181			-4.33465	-7.5739	-7.9729	-6.051	-5.872	-2.8758	-6.88565	-13.7181
					-5.20175	-5.10845	-7.89425	-10.7157			-4.8902	-3.75555	-1.42775	-9.90705	-5.20175	-5.10845	-7.89425	-10.7157
					-8.2961	-3.37515	-7.36515	-19.0305			-0.79865	-3.9418	-6.2674	-6.1974	-8.2961	-3.37515	-7.36515	-19.0305
					-3.08325	-4.0091	-4.3319					0.5047	-9.0273	-19.5563	-3.08325	-4.0091	-4.3319
					-4.5764	-3.21545	-11.6816						-1.4027		-4.5764	-3.21545	-11.6816
					-5.6524		-5.46995								-5.6524		-5.46995
					-3.36575										-3.36575
					-5.6977										-5.6977
VA6, depolarization (mV)											VA6, firing rate (spikes/s)
exposure cond.	E2-hexenal, 1e-7				solvent						exposure cond.	E2-hexenal, 1e-7				solvent
n	5	5	5	5	10	11	11	8			n	5	5	5	5	10	11	11	8
stimulus, geranyl acetate (log[conc])	-7	-6	-5	-4	-7	-6	-5	-4			stimulus, geranyl acetate (log[conc])	-7	-6	-5	-4	-7	-6	-5	-4
	8.2098	13.695	31.8216	28.8076	2.9566	9.51	21.0072	53.1428				2.9997	4.1663	49.4951	54.6612	-0.5	2.8331	23.4977	114.655
	21.6484	23.9378	21.1042	31.4546	10.7818	13.7694	37.4936	26.2416				36.663	41.6625	25.1642	48.4952	0.9999	8.3325	64.4936	62.8271
	12.1088	15.9544	23.0724	30.3344	9.6622	11.4316	21.6682	21.226				14.8319	17.6649	31.9968	46.9953	6.1661	7.166	24.1643	32.1635
	12.4656	27.1658	25.9108	36.6624	15.1224	7.9568	12.1214	20.5926				15.4985	39.4961	40.9959	72.8261	12.3321	9.3324	12.1655	68.3265
	28.6132	30.5262	35.6938	46.203	20.798	6.084	13.2124	24.6486				38.8295	44.4956	63.1604	114.389	35.4965	4.3329	16.9983	50.6616
					4.7908	12.4594	17.221	29.3724								1.8332	20.1647	44.9955	73.826
					11.9314	11.1308	18.0052	23.895								18.9981	12.3321	35.1632	59.994
					14.2012	11.0766	37.4398	35.936								12.1655	7.3326	74.9925	88.6578
					14.6904	20.9532	22.7406									12.4988	37.9962	36.663
					21.1446	16.6818	22.5916									38.8295	26.8307	29.4971
						17.8776	23.3314										19.4981	55.1612
