# Supplementary material for: Chronic exposure to odors at naturally occurring concentrations triggers limited plasticity in early stages of Drosophila olfactory processing
Source: eLife. 2023 May 30;12:e85443. doi: 10.7554/eLife.85443 (PMC10229125; doi:10.7554/eLife.85443)
Supplement: Figure 4—source data 1. [file elife-85443-fig4-data1.xlsx]

## Sheet: Sheet1
VA6, depolarization (mV)										VA6, firing rate (spikes/s)
exposure cond.	geranyl acetate (20%)				solvent					exposure cond.	geranyl acetate (20%)				solvent
n	5	5	5	6	5	5	5	6		n	5	5	5	6	5	5	5	6
stimulus, geranyl acetate (log10[conc])	-7	-6	-5	-4	-7	-6	-5	-4		stimulus, geranyl acetate (log[conc])	-7	-6	-5	-4	-7	-6	-5	-4
	30.9325	30.1613	39.9549	37.6169	12.4738	13.041	29.7008	34.0703			20.641	22.5846	31.8205	71.9754	8.71795	10.4574	44.3179	71.0933
	17.4894	22.3754	24.7106	30.1464	15.1943	23.1536	37.2529	42.1209			22.9744	27.5077	33.9359	71.0933	7.74359	9.7641	39.6974	65.7128
	14.0605	19.7235	32.6707	31.1228	11.6863	12.6677	11.8179	24.8019			27.9744	28.3077	76.5897	86.2646	7.17949	9.15692	25.4205	41.9856
	20.0287	20.5574	31.2746	31.3871	14.1126	17.8396	23.8911	28.1434			14.7692	19.241	29.1026	62.9785	21.641	14.199	48.3692	81.5897
	14.8069	21.2054	39.8914	36.7114	14.2744	20.7109	30.5149	36.8997			18.1282	20.5128	30.3077	61.3908	22.4615	22.3487	58.7692	90.8513
				21.715				35.3155						61.2859				81.6193
DM6, depolarization (mV)										DM6, firing rate (spikes/s)
exposure cond.	geranyl acetate (20%)				solvent					exposure cond.	geranyl acetate (20%)				solvent
n	6	6	6	6	6	6	6	5		n	6	6	6	6	6	6	6	5
stimulus, valeric acid (log10[conc])	-3.3	-3	-2.3	-2	-3.3	-3	-2.3	-2		stimulus, valeric acid (log[conc])	-3.3	-3	-2.3	-2	-3.3	-3	-2.3	-2
	12.4922	16.3249	19.6298	32.4446	4.2606	14.3424	20.9871	33.4934			29.2571	60.9714	51.2	134.857	3.80952	46.8571	46.9333	125.714
	8.02994	24.9098	19.3466	19.3244	4.19257	17.9317	18.8572	24.8993			22.9333	61.8095	48.9143	79.0857	1.14286	25.2571	45.6762	111.314
	13.8685	16.0523	21.9759	27.5001	5.77882	17.3178	17.6741	20.0185			24.381	58.6667	66.2857	110.857	17.981	51.1429	26.1905	72.9143
	10.2639	14.987	23.007	37.4547	7.16949	8.4338	22.9953	26.1494			22.5524	46.9333	88.6857	133.029	19.8095	36.4286	84.019	83.2
	13.1628	20.1415	25.5886	24.4131	2.98542	14.9444	16.3513	22.8535			38.8876	67.8857	98.5143	83.6571	6.19048	39.4286	62.0714	85.2571
	12.9782	24.2451	21.0157	29.3724	8.70255	11.5374	19.9139				13.5619	59.5048	52.5714	101.486	14.6667	28.8571	48.6095
