# Supplementary material for: Chronic exposure to odors at naturally occurring concentrations triggers limited plasticity in early stages of Drosophila olfactory processing
Source: eLife. 2023 May 30;12:e85443. doi: 10.7554/eLife.85443 (PMC10229125; doi:10.7554/eLife.85443)
Supplement: Figure 5—figure supplement 1—source data 1. [file elife-85443-fig5-figsupp1-data1.xlsx]

## Sheet: V
exposure cond	SOLVENT (E2-hex control)								E2-HEXENAL exposed								SOLVENT (2-but control)								2-BUTANONE exposed
n (brains)	8								11								10								13
		Volume ("area")	CD8gfp Int Density	Avg. Intensity/unit volume (CD8gfp)	nc82 Int Density	Avg. Intensity/unit volume (nc82)	Norm. CD8gfp			Volume ("area")	CD8gfp Int Density	Avg. Intensity/unit volume (CD8gfp)	nc82 Int Density	Avg. Intensity/unit volume (nc82)	Norm. CD8gfp			Volume ("area")	CD8gfp Int Density	Avg. Intensity/unit volume (CD8gfp)	nc82 Int Density	Avg. Intensity/unit volume (nc82)	Norm. CD8gfp			Volume ("area")	CD8gfp Int Density	Avg. Intensity/unit volume (CD8gfp)	nc82 Int Density	Avg. Intensity/unit volume (nc82)	Norm. CD8gfp
	brain1L	1932.58	3951321	2044.59	3404306	1761.54	1.16068		brain1L	2136.58	4731971	2214.74	2268607	1061.79	2.08585		brain1L	2928.56	8874160	3030.21	5034522	1719.11	1.76266		brain1L	3154.39	6993180	2216.96	4186663	1327.25	1.67035
	brain1R	2407	4393214	1825.18	4861114	2019.57	0.903746		brain1R	2197.43	5987426	2724.74	2377372	1081.89	2.51851		brain1R	1055.08	2854119	2705.13	1575522	1493.28	1.81154		brain1R	3687.36	7919866	2147.84	4560236	1236.72	1.73672
	brain2L	2042.34	6949952	3402.94	4516670	2211.52	1.53873		brain2L	3906.92	4961227	1269.86	3992373	1021.87	1.24268		brain2L	1901.71	5884566	3094.36	3067098	1612.81	1.91861		brain2L	1123.14	2930085	2608.82	1614317	1437.32	1.81506
	brain2R	1939.41	5472156	2821.55	3876157	1998.63	1.41175		brain2R	2698.64	4618074	1711.26	2648522	981.429	1.74364		brain2R	1839.99	4719123	2564.76	2077075	1128.85	2.272		brain2R	1762.2	5151102	2923.11	2230134	1265.54	2.30977
	brain3L	3824.49	5660987	1480.19	4777540	1249.2	1.18492		brain3L	1932.58	3764231	1947.78	2110404	1092.02	1.78365		brain3L	3013.27	5639658	1871.61	4298771	1426.61	1.31192		brain3L	5210.31	6617307	1270.04	2671308	512.697	2.47718
	brain3R	850.873	1257507	1477.9	919681	1080.87	1.36733		brain3R	2407	3299540	1370.81	2256431	937.445	1.46228		brain3R	3012.59	5976964	1983.99	3233710	1073.4	1.84833		brain3R	2510.31	4212571	1678.11	2612700	1040.79	1.61234
	brain4L	4769.47	8575047	1797.9	5040538	1056.83	1.70122		brain4L	1810.74	4470241	2468.74	3113190	1719.29	1.4359		brain4L	1612.65	4602321	2853.89	2612010	1619.7	1.76198		brain4L	1838.38	5010084	2725.28	3235436	1759.94	1.5485
	brain4R	6699.89	9428880	1407.32	5306131	791.973	1.77698		brain4R	1240.86	3247318	2616.99	1910799	1539.9	1.69946		brain4R	2022.79	5591480	2764.25	3807468	1882.29	1.46856		brain4R	1666.41	4761035	2857.06	2143091	1286.05	2.22157
	brain5L	3018.32	6379119	2113.47	6663492	2207.69	0.957324		brain5L	2214.11	5005946	2260.93	2548169	1150.88	1.96453		brain5L	2345.81	7319418	3120.21	4537882	1934.46	1.61296		brain5L	2988.49	5594717	1872.09	3614169	1209.36	1.548
	brain5R	3929.63	5238977	1333.2	4188463	1065.87	1.25081		brain5R	1376.09	3132638	2276.48	1580457	1148.51	1.98211		brain5R	2287.68	6871301	3003.62	5227946	2285.26	1.31434		brain5R	2896.36	6081860	2099.83	4007998	1383.81	1.51743
	brain6L	2766.99	7265849	2625.9	5923606	2140.81	1.22659		brain6L	2665.24	5159792	1935.96	4029966	1512.04	1.28036		brain6L	2093.08	6599319	3152.92	3036682	1450.82	2.1732		brain6L	2187.44	5301300	2423.52	3254676	1487.89	1.62883
	brain6R	2004.86	5954011	2969.79	4193270	2091.55	1.4199		brain6R	843.849	3223019	3819.42	1380309	1635.73	2.335		brain6R	2565.69	6163476	2402.27	4267064	1663.12	1.44443		brain6R	2471.26	4054879	1640.81	3191247	1291.34	1.27063
	brain7L	2950.28	3615891	1225.61	2916907	988.69	1.23963		brain7L	1623.57	4645219	2861.11	3484381	2146.12	1.33315		brain7L	4450.44	6290825	1413.53	5876489	1320.43	1.07051		brain7L	1791.64	4912692	2742	2091316	1167.26	2.34909
	brain7R	2755.66	5360494	1945.27	3419512	1240.91	1.56762		brain7R	1400.82	4414165	3151.13	2916160	2081.75	1.51369		brain7R	2602.88	4090828	1571.65	2692554	1034.45	1.51931		brain7R	2375.65	4217334	1775.23	3013149	1268.35	1.39964
	brain8L	9834.39	20300000	2064.19	13700000	1393.07	1.48175		brain8L	3508.87	7833649	2232.53	5376295	1532.2	1.45707		brain8L	2097.38	6586290	3140.24	4661662	2222.61	1.41286		brain8L	3129.52	4534698	1449.01	4002119	1278.83	1.13307
	brain8R	8826.11	11600000	1314.28	7337125	831.298	1.581		brain8R	1788.62	4232164	2366.17	2532146	1415.7	1.67137		brain8R	2197.55	5892131	2681.23	4361145	1984.55	1.35105		brain8R	3149.08	5410151	1718.01	4634661	1471.75	1.16732
									brain9L	2191.34	5364254	2447.93	3238634	1477.92	1.65633		brain9L	2747.38	5734465	2087.25	4790997	1743.84	1.19693		brain9L	2941.35	4800934	1632.22	6005134	2041.63	0.799472
									brain9R	2321.84	5223463	2249.7	2952653	1271.68	1.76907		brain9R	2508.32	5312931	2118.12	5217579	2080.11	1.01828		brain9R	2418.76	6103991	2523.6	6798715	2810.82	0.897815
									brain10L	1873.96	4771112	2546	2624683	1400.61	1.81779		brain10L	3191.34	6268507	1964.23	6409786	2008.5	0.977959		brain10L	2210.71	6242187	2823.61	5207441	2355.55	1.19871
									brain10R	2607.38	5002746	1918.68	3506925	1345	1.42653		brain10R	4103.09	6409086	1562.02	7137513	1739.55	0.897944		brain10R	1943.7	5558940	2859.99	3709955	1908.71	1.49838
									brain11L	5210.31	6834344	1311.7	6484306	1244.52	1.05398										brain11L	1913.46	3963301	2071.28	4300318	2247.41	0.92163
									brain11R	2510.31	3875252	1543.73	2904187	1156.9	1.33437										brain11R	1856.6	4148906	2234.68	4096912	2206.68	1.01269
																									brain12L	1625.91	2661768	1637.1	2898468	1782.68	0.918336
																									brain12R	2735.9	4951774	1809.93	4170652	1524.42	1.18729
																									brain13L	2937.36	5076253	1728.17	4175291	1421.44	1.21578
																									brain13R	2072.84	3584732	1729.38	3126487	1508.31	1.14657

## Sheet: DM1
exposure cond	SOLVENT (E2-hex control)								E2-HEXENAL exposed									SOLVENT (2-but control)								2-BUTANONE exposed
n (brains)	8								11									10								13
		Volume ("area")	CD8gfp Int Density	Avg. Intensity/unit volume (CD8gfp)	nc82 Int Density	Avg. Intensity/unit volume (nc82)	Norm. CD8gfp			Volume ("area")	CD8gfp Int Density	Avg. Intensity/unit volume (CD8gfp)	nc82 Int Density	Avg. Intensity/unit volume (nc82)	Norm. CD8gfp				Volume ("area")	CD8gfp Int Density	Avg. Intensity/unit volume (CD8gfp)	nc82 Int Density	Avg. Intensity/unit volume (nc82)	Norm. CD8gfp			Volume ("area")	CD8gfp Int Density	Avg. Intensity/unit volume (CD8gfp)	nc82 Int Density	Avg. Intensity/unit volume (nc82)	Norm. CD8gfp
	brain1L	2176.12	5770030	2651.52	4115897	1891.39	1.40189		brain1L	2689.76	6636813	2467.44	3209640	1193.28	2.06777			brain1L	1980.65	6266799	3164.02	3345500	1689.09	1.8732		brain1L	2253.32	5753836	2553.5	4145640	1839.79	1.38792
	brain1R	3437.98	4060963	1181.21	4346280	1264.19	0.934354		brain1R	1690.76	3823309	2261.29	1554367	919.329	2.45972			brain1R	1379.64	3408910	2470.87	1553622	1126.11	2.19417		brain1R	2481.63	6291823	2535.36	3833834	1544.89	1.64113
	brain2L	3052.56	9116897	2986.64	6685476	2190.12	1.36369		brain2L	2363.58	3403218	1439.86	2531534	1071.06	1.34433			brain2L	2570.75	8311597	3233.14	4151791	1615.01	2.00193		brain2L	1320.14	3752310	2842.35	2105992	1595.27	1.78173
	brain2R	1237.69	3079820	2488.37	2562406	2070.32	1.20193		brain2R	2564.53	4669150	1820.66	2769394	1079.88	1.68598			brain2R	2346.89	6764868	2882.49	4125990	1758.07	1.63957		brain2R	1341.7	4024882	2999.84	2042802	1522.55	1.97028
	brain3L	2120.54	3093902	1459.02	1873800	883.644	1.65114		brain3L	2176.12	7909447	3634.66	4284403	1968.83	1.8461			brain3L	3538.6	6737774	1904.08	4323774	1221.89	1.55831		brain3L	3760.88	10600000	2818.49	4661066	1239.36	2.27416
	brain3R	1860.26	2643556	1421.07	1478603	794.837	1.78787		brain3R	3437.98	8192694	2382.99	5298638	1541.21	1.54619			brain3R	2601.13	5241390	2015.05	3122357	1200.39	1.67866		brain3R	3045.7	3036686	997.042	1653534	542.908	1.83648
	brain4L	5826.05	9553428	1639.78	4932935	846.703	1.93666		brain4L	1856.89	4637233	2497.31	2653522	1429.01	1.74758			brain4L	2015.47	5570027	2763.64	3501146	1737.14	1.59092		brain4L	1113.32	3189244	2864.63	1673453	1503.12	1.90579
	brain4R	14606.1	22078031	1511.56	11600000	794.19	1.90328		brain4R	2077.24	5339481	2570.47	3063445	1474.77	1.74297			brain4R	1659.52	4374141	2635.78	2988419	1800.77	1.4637		brain4R	2256.87	6724408	2979.53	3053275	1352.88	2.20236
	brain5L	5760.23	9932155	1724.26	8303898	1441.59	1.19608		brain5L	1946.69	4615114	2370.75	2588260	1329.57	1.7831			brain5L	2423.31	7984407	3294.83	4837105	1996.07	1.65066		brain5L	3701.5	8221864	2221.23	5097548	1377.16	1.61291
	brain5R	3571.8	5515628	1544.21	4364686	1221.98	1.26369		brain5R	1412.09	2834754	2007.49	1318399	933.653	2.15015			brain5R	2607.83	8100814	3106.34	5107281	1958.44	1.58613		brain5R	2840.73	7142993	2514.49	4686043	1649.59	1.52431
	brain6L	3050.95	8742391	2865.47	6867184	2250.84	1.27307		brain6L	2169.32	4862497	2241.48	3666918	1690.35	1.32604			brain6L	1962.14	6824238	3477.96	3817243	1945.45	1.78774		brain6L	1116.62	2159299	1933.79	1724576	1544.46	1.25208
	brain6R	2234.77	7201942	3222.67	4609767	2062.75	1.56232		brain6R	2158.42	4648951	2153.87	4004350	1855.22	1.16098			brain6R	1289.37	3660826	2839.23	2631935	2041.25	1.39093		brain6R	4348.08	6410484	1474.32	5480990	1260.55	1.16959
	brain7L	3182.28	4758611	1495.35	3719397	1168.78	1.2794		brain7L	1234.52	3758929	3044.85	1741802	1410.91	2.15807			brain7L	6996.37	9182200	1312.42	7968763	1138.99	1.15227		brain7L	1857.45	4881561	2628.09	2514704	1353.84	1.94121
	brain7R	3183.03	5407963	1699	3306814	1038.89	1.6354		brain7R	845.393	2999472	3548.02	1664172	1968.52	1.80238			brain7R	2461.69	3697489	1502.01	3112062	1264.2	1.18812		brain7R	2348.32	5486642	2336.41	3517958	1498.07	1.55961
	brain8L	3748.9	5351638	1427.52	3710294	989.703	1.44238		brain8L	1581.77	2852636	1803.45	1987009	1256.2	1.43564			brain8L	2679.24	9156763	3417.68	6571005	2452.57	1.39351		brain8L	3234.65	7514974	2323.27	6137019	1897.27	1.22453
	brain8R	6920.27	12900000	1864.09	8803615	1272.15	1.46531		brain8R	3073.69	5900709	1919.75	3831117	1246.42	1.54021			brain8R	2279.14	7848348	3443.56	5493021	2410.13	1.42879		brain8R	3493.7	7635018	2185.37	6160687	1763.37	1.23931
									brain9L	878.783	2297592	2614.52	1159201	1319.1	1.98205			brain9L	3582.32	8203424	2289.98	7227610	2017.58	1.13501		brain9L	3653.87	4285422	1172.84	5426674	1485.18	0.789696
									brain9R	2282.88	5255491	2302.13	2951333	1292.81	1.78072			brain9R	2104.67	4930660	2342.72	4442016	2110.55	1.11001		brain9R	3552.11	7243485	2039.21	7387577	2079.77	0.980495
									brain10L	2455.33	5670350	2309.4	3430763	1397.27	1.6528			brain10L	1530.48	1848364	1207.7	2483281	1622.55	0.744323		brain10L	2679	8778888	3276.92	7007715	2615.79	1.25275
									brain10R	2066.46	4255460	2059.3	2593842	1255.21	1.6406			brain10R	4783.13	5470972	1143.81	7638085	1596.88	0.716275		brain10R	2510.03	7436298	2962.64	5898549	2350	1.2607
									brain11L	3760.88	6666781	1772.67	5235085	1391.99	1.27348											brain11L	2686.1	6020451	2241.33	5367080	1998.09	1.12174
									brain11R	3045.7	4435834	1456.43	3569881	1172.11	1.24257											brain11R	2276.55	5523681	2426.34	4174058	1833.5	1.32334
																										brain12L	3932.77	8465882	2152.65	7363025	1872.23	1.14978
																										brain12R	1482.39	3181628	2146.29	2833892	1911.71	1.12271
																										brain13L	3018.67	7252957	2402.7	5794812	1919.66	1.25163
																										brain13R	2149.22	5006444	2329.43	4062051	1890.02	1.23249

## Sheet: DP1m
exposure cond	SOLVENT (E2-hex control)								E2-HEXENAL exposed									SOLVENT (2-but control)								2-BUTANONE exposed
n (brains)	8								11									10								13
		Volume ("area")	CD8gfp Int Density	Avg. Intensity/unit volume (CD8gfp)	nc82 Int Density	Avg. Intensity/unit volume (nc82)	Norm. CD8gfp			Volume ("area")	CD8gfp Int Density	Avg. Intensity/unit volume (CD8gfp)	nc82 Int Density	Avg. Intensity/unit volume (nc82)	Norm. CD8gfp				Volume ("area")	CD8gfp Int Density	Avg. Intensity/unit volume (CD8gfp)	nc82 Int Density	Avg. Intensity/unit volume (nc82)	Norm. CD8gfp			Volume ("area")	CD8gfp Int Density	Avg. Intensity/unit volume (CD8gfp)	nc82 Int Density	Avg. Intensity/unit volume (nc82)	Norm. CD8gfp
	brain1L	3717.64	11070966	2977.95	6126868	1648.05	1.80695		brain1L	2013.35	5529754	2746.55	2055283	1020.83	2.69051			brain1L	4219.73	15200000	3602.13	5720770	1355.72	2.65698		brain1L	3628.26	11000000	3031.76	5401242	1488.66	2.03657
	brain1R	25596.5	22575502	881.976	34481114	1347.1	0.654721		brain1R	4394.48	12790273	2910.53	4057487	923.315	3.15226			brain1R	3754.43	12800000	3409.3	4104247	1093.17	3.11872		brain1R	3730.15	11000000	2948.94	5106119	1368.88	2.15428
	brain2L	3678.63	13083827	3556.71	7524765	2045.54	1.73877		brain2L	4160.32	9257132	2225.1	4713357	1132.93	1.96402			brain2L	3386.75	12100000	3572.74	4644496	1371.37	2.60523		brain2L	3224.26	10400000	3225.55	4413453	1368.83	2.35643
	brain2R	3580.71	10268591	2867.75	6727126	1878.71	1.52645		brain2R	2250.62	5976291	2655.39	2339278	1039.39	2.55476			brain2R	3041.82	9979571	3280.79	3675012	1208.16	2.71552		brain2R	3182.44	10400000	3267.93	4005677	1258.68	2.59632
	brain3L	2363.94	4382050	1853.71	2249142	951.438	1.94832		brain3L	3717.64	9737405	2619.24	3623595	974.702	2.68722			brain3L	5025.23	13200000	2626.75	7100284	1412.93	1.85908		brain3L	5993.74	14500000	2419.19	5166807	862.034	2.80638
	brain3R	2562.43	4592472	1792.23	2042510	797.098	2.24845		brain3R	25596.5	5635994	220.186	2552506	99.7209	2.20802			brain3R	4530.38	11600000	2560.49	6280883	1386.39	1.84687		brain3R	3213.4	7458963	2321.21	3355310	1044.16	2.22303
	brain4L	1905.51	4132805	2168.87	1400706	735.083	2.95052		brain4L	2256.12	6199397	2747.82	2661014	1179.47	2.32971			brain4L	3809.98	13300000	3490.83	6221958	1633.07	2.13759		brain4L	2067.47	7188693	3477.04	3010281	1456.02	2.38805
	brain4R	4082.16	7523934	1843.13	2525811	618.744	2.97882		brain4R	3228.73	9573186	2965	4243680	1314.35	2.25587			brain4R	3235.91	10600000	3275.74	5293763	1635.94	2.00236		brain4R	3041.82	9874485	3246.24	3101693	1019.68	3.18358
	brain5L	5757.28	11500000	1997.47	7091778	1231.79	1.6216		brain5L	2594.46	7180032	2767.45	2804210	1080.84	2.56045			brain5L	3360.54	12300000	3660.13	5345696	1590.73	2.30092		brain5L	4358.81	11400000	2615.39	5153529	1182.33	2.21208
	brain5R	6638.19	11800000	1777.59	6720095	1012.34	1.75593		brain5R	2775.27	7531385	2713.75	2785414	1003.65	2.70387			brain5R	3242.69	10700000	3299.73	5208584	1606.25	2.0543		brain5R	2160.47	6619140	3063.75	2964423	1372.12	2.23286
	brain6L	4383.41	13600000	3102.61	7654579	1746.26	1.77671		brain6L	2000.95	5114257	2555.91	2876868	1437.75	1.77772			brain6L	3684.57	14100000	3826.77	5437005	1475.62	2.59334		brain6L	2584.66	6406497	2478.66	3093989	1197.06	2.07063
	brain6R	3074.98	11400000	3707.34	5802994	1887.16	1.9645		brain6R	2460.98	6804766	2765.06	3900064	1584.76	1.74478			brain6R	4175.4	14300000	3424.82	7630559	1827.5	1.87404		brain6R	4230.49	7105648	1679.63	4428531	1046.81	1.60452
	brain7L	5586.01	10300000	1843.89	6177557	1105.9	1.66733		brain7L	3026.16	9473293	3130.47	3644121	1204.21	2.59961			brain7L	10752.1	17700000	1646.19	12200000	1134.66	1.45082		brain7L	2557.91	8771598	3429.21	2773434	1084.26	3.16272
	brain7R	5054.98	10100000	1998.03	4820164	953.548	2.09536		brain7R	2284.03	8998753	3939.86	3861855	1690.81	2.33016			brain7R	3693.86	6137811	1661.63	4644378	1257.32	1.32156		brain7R	3238.42	8267383	2552.9	3555644	1097.96	2.32514
	brain8L	21642	39200000	1811.29	23400000	1081.23	1.67521		brain8L	6569.89	15900000	2420.13	7997603	1217.31	1.9881			brain8L	3480.43	13300000	3821.36	7164668	2058.56	1.85633		brain8L	4295.57	10900000	2537.5	6660571	1550.57	1.6365
	brain8R	9634.19	20800000	2158.98	10400000	1079.49	2		brain8R	3626.17	9041511	2493.41	3850763	1061.94	2.34798			brain8R	2926.8	10900000	3724.2	6080950	2077.68	1.79248		brain8R	3337.47	8916159	2671.54	5213304	1562.05	1.71027
									brain9L	2989.57	8742551	2924.35	3521342	1177.88	2.48273			brain9L	3020.98	7918848	2621.28	4950832	1638.81	1.5995		brain9L	4346.99	7422660	1707.54	6380858	1467.88	1.16327
									brain9R	3685.93	9583071	2599.91	4200399	1139.58	2.28147			brain9R	4260.59	11100000	2605.27	7480615	1755.77	1.48384		brain9R	2168.7	6288106	2899.48	4510776	2079.95	1.39402
									brain10L	4342.75	11700000	2694.15	5591535	1287.56	2.09245			brain10L	1323.44	2785262	2104.56	2112761	1596.42	1.3183		brain10L	3322.58	12400000	3732.04	7217952	2172.39	1.71794
									brain10R	4918.76	12100000	2459.97	5440786	1106.13	2.22394			brain10R	8648.39	11000000	1271.91	11000000	1271.91	1		brain10R	2002.65	7686520	3838.17	3702954	1849.02	2.07578
									brain11L	5993.74	11947112	1993.26	6964300	1161.93	1.71548											brain11L	3722.68	10000000	2686.23	6233665	1674.51	1.60419
									brain11R	3213.4	7358635	2289.98	3826560	1190.81	1.92304											brain11R	2986.36	8511676	2850.18	5172384	1732	1.6456
																										brain12L	6411.57	16700000	2604.66	11000000	1715.65	1.51818
																										brain12R	4390.34	11800000	2687.72	7681719	1749.69	1.53611
																										brain13L	4926.8	13000000	2638.63	8422977	1709.63	1.5434
																										brain13R	3727.54	9781977	2624.25	6134811	1645.81	1.5945

## Sheet: VM7
exposure cond	SOLVENT (E2-hex control)								E2-HEXENAL exposed									SOLVENT (2-but control)								2-BUTANONE exposed
n (brains)	8								11									10								13
		Volume ("area")	CD8gfp Int Density	Avg. Intensity/unit volume (CD8gfp)	nc82 Int Density	Avg. Intensity/unit volume (nc82)	Norm. CD8gfp			Volume ("area")	CD8gfp Int Density	Avg. Intensity/unit volume (CD8gfp)	nc82 Int Density	Avg. Intensity/unit volume (nc82)	Norm. CD8gfp				Volume ("area")	CD8gfp Int Density	Avg. Intensity/unit volume (CD8gfp)	nc82 Int Density	Avg. Intensity/unit volume (nc82)	Norm. CD8gfp			Volume ("area")	CD8gfp Int Density	Avg. Intensity/unit volume (CD8gfp)	nc82 Int Density	Avg. Intensity/unit volume (nc82)	Norm. CD8gfp
	brain1L	510.414	1216161	2382.69	991154	1941.86	1.22702		brain1L	899.969	3313676	3681.99	1337729	1486.42	2.47709			brain1L	156.438	446632	2855.02	332191	2123.47	1.3445		brain1L	513.82	1432802	2788.53	1115137	2170.29	1.28487
	brain1R	1330.49	2121516	1594.53	1666143	1252.27	1.27331		brain1R	579.468	1372360	2368.31	676379	1167.24	2.02898			brain1R	408.739	985572	2411.25	524960	1284.34	1.87742		brain1R	482.152	1148090	2381.18	876490	1817.87	1.30987
	brain2L	645.201	2144667	3324.03	1637938	2538.65	1.30937		brain2L	465.581	922499	1981.39	753875	1619.21	1.22368			brain2L	510.986	1536214	3006.37	932378	1824.66	1.64763		brain2L	568.333	1376041	2421.19	887135	1560.94	1.55111
	brain2R	865.312	2365889	2734.14	1943659	2246.19	1.21723		brain2R	893.788	2751195	3078.13	1530569	1712.45	1.7975			brain2R	1145.85	3825347	3338.45	2540359	2217.02	1.50583		brain2R	183.335	483958	2639.74	288366	1572.89	1.67828
	brain3L	867.604	1535856	1770.23	1083244	1248.55	1.41783		brain3L	510.414	1000803	1960.77	614865	1204.64	1.62768			brain3L	862.308	1769354	2051.88	1470865	1705.73	1.20293		brain3L	976.182	2838588	2907.85	1639386	1679.39	1.73149
	brain3R	866.953	1203213	1387.86	1075839	1240.94	1.1184		brain3R	1330.49	1993733	1498.49	1378608	1036.16	1.44619			brain3R	1242.14	3528683	2840.81	1842074	1482.98	1.9156		brain3R	942.864	1894015	2008.79	1286608	1364.57	1.4721
	brain4L	1606.27	2557736	1592.35	1430962	890.862	1.78742		brain4L	756.769	1583534	2092.49	1103799	1458.57	1.43462			brain4L	612.624	1548334	2527.38	989885	1615.81	1.56416		brain4L	639.63	1628026	2545.26	1097010	1715.07	1.48406
	brain4R	1233.99	2379266	1928.1	1116260	904.59	2.13146		brain4R	1201.18	2920674	2431.51	1906281	1587.01	1.53213			brain4R	1004.54	3016454	3002.81	1985251	1976.27	1.51943		brain4R	154.537	466853	3020.98	225468	1458.99	2.0706
	brain5L	554.421	1024852	1848.51	795585	1434.98	1.28817		brain5L	695.391	2019945	2904.76	1242710	1787.07	1.62544			brain5L	683.635	2713730	3969.56	1244220	1820.01	2.18107		brain5L	723.766	1603489	2215.48	1163121	1607.04	1.37861
	brain5R	1095.64	2834728	2587.29	1668896	1523.22	1.69856		brain5R	1001.57	2746606	2742.31	1268367	1266.38	2.16547			brain5R	885.44	3484013	3934.78	1975895	2231.54	1.76326		brain5R	867.257	1961948	2262.25	1539608	1775.26	1.27432
	brain6L	803.98	2946792	3665.26	2140466	2662.34	1.37671		brain6L	591.045	1394222	2358.91	1176719	1990.91	1.18484			brain6L	700.777	2282921	3257.7	1295991	1849.36	1.76153		brain6L	477.131	1055515	2212.21	890952	1867.31	1.1847
	brain6R	851.798	2564174	3010.31	1747599	2051.66	1.46726		brain6R	569.918	1195247	2097.23	1071542	1880.17	1.11545			brain6R	1027.42	3024884	2944.14	2300838	2239.42	1.31469		brain6R	360.753	483395	1339.96	579718	1606.97	0.833845
	brain7L	1007.38	1596224	1584.54	1358901	1348.95	1.17464		brain7L	254.92	758415	2975.11	425737	1670.08	1.78142			brain7L	680.622	1179336	1732.73	1125117	1653.07	1.04819		brain7L	752.672	2053261	2727.96	1119845	1487.83	1.83352
	brain7R	1526.18	4474772	2932.02	2479647	1624.75	1.8046		brain7R	363.005	1183356	3259.89	739549	2037.3	1.6001			brain7R	744.352	1389376	1866.56	1094439	1470.33	1.26949		brain7R	638.374	1430775	2241.28	1074591	1683.32	1.33146
	brain8L	956.716	1843333	1926.73	1410301	1474.11	1.30705		brain8L	696.65	1648425	2366.22	1159173	1663.92	1.42207			brain8L	848.715	3444862	4058.91	2389264	2815.15	1.44181		brain8L	723.177	1018966	1409.01	1444662	1997.66	0.705332
	brain8R	2421.83	6378175	2633.61	4037215	1667.01	1.57985		brain8R	534.883	1166744	2181.31	805310	1505.58	1.44881			brain8R	845.093	3477962	4115.48	2525916	2988.92	1.37691		brain8R	853.37	2155467	2525.83	1448541	1697.44	1.48803
									brain9L	255.64	599835	2346.4	332659	1301.28	1.80315			brain9L	1189.92	3220857	2706.79	2752842	2313.47	1.17001		brain9L	1134.54	2750600	2424.41	2428007	2140.07	1.13286
									brain9R	551.65	1663089	3014.75	856015	1551.74	1.94283			brain9R	825.775	2467109	2987.63	2019883	2446.05	1.22141		brain9R	868.906	2768180	3185.82	2470307	2843.01	1.12058
									brain10L	911.597	2953491	3239.91	1772800	1944.72	1.666			brain10L	860.215	1360549	1581.64	1701620	1978.13	0.799561		brain10L	831.75	3142739	3778.47	2644418	3179.34	1.18844
									brain10R	849.855	2455624	2889.46	1691871	1990.78	1.45143			brain10R	1047.01	1184644	1131.45	1940572	1853.44	0.610461		brain10R	1044.22	2746246	2629.94	2394603	2293.19	1.14685
									brain11L	976.182	1753430	1796.21	1447264	1482.58	1.21155											brain11L	905.266	2585472	2856.03	2002996	2212.6	1.2908
									brain11R	942.864	2366005	2509.38	1687719	1789.99	1.4019											brain11R	690.837	1874250	2713.01	1473926	2133.54	1.2716
																										brain12L	1395.83	3660821	2622.68	2720625	1949.1	1.34558
																										brain12R	1169.45	3159315	2701.53	2120459	1813.2	1.48992
																										brain13L	1036.73	2516680	2427.52	2021098	1949.5	1.2452
																										brain13R	1107.02	2803375	2532.36	2282111	2061.49	1.22841

## Sheet: DM2
exposure cond	SOLVENT (E2-hex control)								E2-HEXENAL exposed									SOLVENT (2-but control)								2-BUTANONE exposed
n (brains)	8								11									10								13
		Volume ("area")	CD8gfp Int Density	Avg. Intensity/unit volume (CD8gfp)	nc82 Int Density	Avg. Intensity/unit volume (nc82)	Norm. CD8gfp			Volume ("area")	CD8gfp Int Density	Avg. Intensity/unit volume (CD8gfp)	nc82 Int Density	Avg. Intensity/unit volume (nc82)	Norm. CD8gfp				Volume ("area")	CD8gfp Int Density	Avg. Intensity/unit volume (CD8gfp)	nc82 Int Density	Avg. Intensity/unit volume (nc82)	Norm. CD8gfp			Volume ("area")	CD8gfp Int Density	Avg. Intensity/unit volume (CD8gfp)	nc82 Int Density	Avg. Intensity/unit volume (nc82)	Norm. CD8gfp
	brain1L	1576.61	3325914	2109.54	2959357	1877.04	1.12386		brain1L	1242.83	2834095	2280.36	1794149	1443.6	1.57963			brain1L	1868.03	5213519	2790.91	3910436	2093.34	1.33323		brain1L	1627.17	4009098	2463.84	3751152	2305.32	1.06876
	brain1R	6411.66	9518875	1484.62	7917484	1234.86	1.20226		brain1R	1690.86	3796811	2245.49	1914206	1132.09	1.98349			brain1R	1808.07	2882248	1594.1	1765306	976.348	1.63272		brain1R	890.998	2033092	2281.81	1615963	1813.65	1.25813
	brain2L	1056.79	3047496	2883.74	2456645	2324.64	1.24051		brain2L	2027.03	3600017	1776.01	3226623	1591.8	1.11572			brain2L	1587.83	4727121	2977.09	3439784	2166.34	1.37425		brain2L	1309.82	3699665	2824.57	2543667	1942	1.45446
	brain2R	1692.36	3564621	2106.31	3702975	2188.06	0.962637		brain2R	1797.1	3566522	1984.6	2853271	1587.71	1.24998			brain2R	820.562	2383258	2904.42	1709374	2083.17	1.39423		brain2R	1108.94	2940020	2651.19	1833767	1653.62	1.60327
	brain3L	1565.51	2468040	1576.51	1911367	1220.93	1.29124		brain3L	1576.61	2237290	1419.05	1538945	976.113	1.45378			brain3L	1600.17	3238079	2023.59	2548193	1592.45	1.27074		brain3L	1643.36	5442301	3311.68	3358948	2043.95	1.62024
	brain3R	2163.16	3804780	1758.9	2466608	1140.28	1.54252		brain3R	6411.66	2729916	425.774	2325404	362.683	1.17395			brain3R	1669.46	3413092	2044.43	2435751	1459.01	1.40125		brain3R	1387.69	2068798	1490.82	1303478	939.316	1.58714
	brain4L	2432.03	3320258	1365.22	2068454	850.506	1.60519		brain4L	1860.07	4052811	2178.85	3166059	1702.12	1.28008			brain4L	1410.38	3996844	2833.88	2631303	1865.67	1.51896		brain4L	1057.8	2798319	2645.41	1904855	1800.77	1.46905
	brain4R	3391.16	5259499	1550.94	3391990	1000.24	1.55056		brain4R	1773.46	4269219	2407.29	3102697	1749.52	1.37597			brain4R	1742.62	4602856	2641.34	3464581	1988.15	1.32855		brain4R	1363.86	4106483	3010.92	2198347	1611.85	1.86799
	brain5L	1891.95	3674115	1941.97	3054885	1614.67	1.2027		brain5L	1652.42	3618266	2189.68	2697610	1632.53	1.34129			brain5L	1413.78	4162604	2944.3	3046097	2154.57	1.36654		brain5L	1480.35	3168395	2140.3	2507017	1693.53	1.26381
	brain5R	1583.24	3021841	1908.64	2861401	1807.31	1.05607		brain5R	1039.89	1858559	1787.27	1103152	1060.84	1.68477			brain5R	1681.33	5048539	3002.71	3695018	2197.68	1.36631		brain5R	1248.74	2915347	2334.63	2504512	2005.63	1.16404
	brain6L	1867.27	5399417	2891.61	4779060	2559.38	1.12981		brain6L	1523.3	3300642	2166.77	3090222	2028.64	1.06809			brain6L	1793.94	5306730	2958.14	3509152	1956.12	1.51225		brain6L	1526.76	2827970	1852.27	2463355	1613.46	1.14802
	brain6R	625.482	1889346	3020.63	1494393	2389.19	1.26429		brain6R	2392.46	4140511	1730.65	5231024	2186.47	0.79153			brain6R	1309.35	3448671	2633.88	2923776	2233	1.17953		brain6R	1397.43	2072185	1482.85	2093684	1498.24	0.989731
	brain7L	2136.01	3103015	1452.72	3379347	1582.09	0.918229		brain7L	1336.63	3377709	2527.03	2080763	1556.72	1.6233			brain7L	2305.03	3300536	1431.88	3663275	1589.25	0.90098		brain7L	1337.72	3470198	2594.12	2048320	1531.21	1.69417
	brain7R	1503.15	2347764	1561.9	2030048	1350.53	1.15651		brain7R	1411.54	4676088	3312.75	3171956	2247.15	1.4742			brain7R	1941.52	4593135	2365.74	3104125	1598.81	1.47969		brain7R	1366.66	2979592	2180.2	2436104	1782.52	1.2231
	brain8L	2300.87	3926778	1706.65	3162576	1374.51	1.24164		brain8L	1549.78	3317825	2140.84	2653793	1712.37	1.25022			brain8L	994.466	3493951	3513.4	2850487	2866.35	1.22574		brain8L	2254.49	4119364	1827.18	4522410	2005.95	0.910878
	brain8R	4505.2	7700722	1709.3	6320195	1402.87	1.21843		brain8R	2270.21	4164201	1834.28	3782017	1665.93	1.10105			brain8R	971.19	3347794	3447.11	2886967	2972.61	1.15962		brain8R	1518.89	2650299	1744.89	2559389	1685.04	1.03552
									brain9L	1582.59	4051337	2559.94	2644400	1670.93	1.53204			brain9L	1739.01	3537166	2034.01	3664442	2107.2	0.965267		brain9L	1759.65	2879457	1636.38	3443782	1957.08	0.836132
									brain9R	829.598	1677217	2021.72	1381475	1665.23	1.21408			brain9R	1275.53	2745601	2152.52	3009412	2359.34	0.912338		brain9R	1573.9	2945803	1871.65	4102663	2606.68	0.718022
									brain10L	1927.18	4301817	2232.19	3138776	1628.69	1.37054			brain10L	2781.31	3939039	1416.25	4800567	1726.01	0.820536		brain10L	1445.52	4027550	2786.23	4484014	3102	0.898202
									brain10R	1874.36	3635385	1939.54	2987846	1594.06	1.21672			brain10R	2654.7	2966174	1117.33	4547099	1712.85	0.652322		brain10R	1147.22	3240104	2824.31	3185238	2776.49	1.01723
									brain11L	1643.36	2821247	1716.75	2826700	1720.07	0.998071											brain11L	1239.02	2339239	1887.97	2531678	2043.28	0.923988
									brain11R	1387.69	2737254	1972.53	2422517	1745.72	1.12992											brain11R	1548.88	3169735	2046.47	3050578	1969.54	1.03906
																										brain12L	2035.68	3721633	1828.2	3833682	1883.24	0.970772
																										brain12R	2196.44	3919480	1784.47	4120806	1876.13	0.951144
																										brain13L	1807.85	3645987	2016.75	3660266	2024.65	0.996099
																										brain13R	1724.52	3096192	1795.39	3489941	2023.71	0.887176

## Sheet: DL5
exposure cond	SOLVENT (E2-hex control)								E2-HEXENAL exposed									SOLVENT (2-but control)								2-BUTANONE exposed
n (brains)	8								11									10								13
		Volume ("area")	CD8gfp Int Density	Avg. Intensity/unit volume (CD8gfp)	nc82 Int Density	Avg. Intensity/unit volume (nc82)	Norm. CD8gfp			Volume ("area")	CD8gfp Int Density	Avg. Intensity/unit volume (CD8gfp)	nc82 Int Density	Avg. Intensity/unit volume (nc82)	Norm. CD8gfp				Volume ("area")	CD8gfp Int Density	Avg. Intensity/unit volume (CD8gfp)	nc82 Int Density	Avg. Intensity/unit volume (nc82)	Norm. CD8gfp			Volume ("area")	CD8gfp Int Density	Avg. Intensity/unit volume (CD8gfp)	nc82 Int Density	Avg. Intensity/unit volume (nc82)	Norm. CD8gfp
	brain1L	1254.22	4051846	3230.58	2770715	2209.12	1.46238		brain1L	1642.14	4938536	3007.37	2077831	1265.32	2.37677			brain1L	1655.79	6351855	3836.14	3317368	2003.49	1.91473		brain1L	1283.06	4409315	3436.56	2855763	2225.74	1.54401
	brain1R	4629.59	9598871	2073.37	7325003	1582.21	1.31043		brain1R	1736.09	5572664	3209.89	2105250	1212.64	2.64703			brain1R	886.623	3125959	3525.69	1405368	1585.08	2.2243		brain1R	1657.3	5508663	3323.88	3108407	1875.59	1.77218
	brain2L	1044.84	4170868	3991.86	2727933	2610.85	1.52895		brain2L	1543.52	4097194	2654.44	2709391	1755.33	1.51222			brain2L	976.569	3807394	3898.74	1720018	1761.29	2.21358		brain2L	1215.24	4307311	3544.4	2285263	1880.5	1.88482
	brain2R	1151.35	3540251	3074.86	2619785	2275.4	1.35135		brain2R	1320.29	4079413	3089.78	2099935	1590.51	1.94264			brain2R	1037.43	3453267	3328.67	1501884	1447.7	2.29929		brain2R	1401.09	5055963	3608.6	2349838	1677.15	2.15162
	brain3L	1386.2	2656359	1916.28	1627849	1174.32	1.63182		brain3L	1254.22	2688491	2143.56	1315068	1048.52	2.04437			brain3L	1835.76	5610780	3056.38	3292281	1793.42	1.70422		brain3L	1462.24	5906582	4039.41	2671029	1826.67	2.21135
	brain3R	1643.4	3496364	2127.51	1682281	1023.66	2.07835		brain3R	4629.59	3975554	858.727	2703835	584.033	1.47034			brain3R	1577.11	4524508	2868.86	2666274	1690.61	1.69694		brain3R	1319.4	3366269	2551.37	1860232	1409.91	1.8096
	brain4L	1870.83	4068603	2174.76	1919237	1025.87	2.11991		brain4L	1214.94	3714976	3057.74	2020107	1662.72	1.839			brain4L	831.68	3197339	3844.44	1993844	2397.37	1.60361		brain4L	985.607	3634170	3687.24	2094555	2125.14	1.73506
	brain4R	2026.65	4616153	2277.72	1978044	976.014	2.3337		brain4R	1321.15	4138823	3132.75	2289924	1733.29	1.80741			brain4R	1111.35	3739957	3365.25	2189831	1970.43	1.70787		brain4R	807.759	3000216	3714.25	1217630	1507.42	2.46398
	brain5L	1642.68	3940226	2398.66	3144654	1914.34	1.25299		brain5L	1198.96	3914355	3264.79	2008186	1674.94	1.9492			brain5L	959.606	3757414	3915.58	2004710	2089.1	1.87429		brain5L	1367.45	3449396	2522.51	2199734	1608.64	1.5681
	brain5R	1635.12	3333115	2038.45	2364641	1446.15	1.40956		brain5R	1292.98	3799247	2938.37	1713559	1325.28	2.21717			brain5R	1366.66	4930041	3607.37	3023551	2212.37	1.63055		brain5R	1360.67	4022524	2956.28	2545157	1870.52	1.58046
	brain6L	1650.38	5563689	3371.16	3865426	2342.14	1.43935		brain6L	856.182	2389113	2790.43	1840472	2149.63	1.2981			brain6L	928.583	3884533	4183.29	1889638	2034.97	2.0557		brain6L	1201.79	3093127	2573.76	1913111	1591.88	1.6168
	brain6R	977.873	4073202	4165.37	2640973	2700.73	1.54231		brain6R	1090.68	3391446	3109.47	2249818	2062.76	1.50743			brain6R	1746.74	5971769	3418.8	4394215	2515.66	1.35901		brain6R	2041.87	3754109	1838.57	2702828	1323.7	1.38896
	brain7L	1335.37	3051037	2284.78	2497848	1870.53	1.22147		brain7L	944.231	3361360	3559.89	1879922	1990.96	1.78803			brain7L	2078.77	3969575	1909.58	2880847	1385.84	1.37792		brain7L	1208	4403874	3645.6	1830323	1515.17	2.40606
	brain7R	1327.42	3312437	2495.39	1956855	1474.18	1.69274		brain7R	1058.79	4561064	4307.8	2325877	2196.73	1.96101			brain7R	1375.48	3205880	2330.73	2255338	1639.67	1.42146		brain7R	923.742	2598865	2813.41	1545572	1673.16	1.68149
	brain8L	2808.98	6068010	2160.22	4133759	1471.62	1.46792		brain8L	1140.94	3316349	2906.69	2158541	1891.91	1.53638			brain8L	969.361	4091289	4220.6	2821403	2910.58	1.45009		brain8L	1353.57	3337484	2465.69	2552458	1885.72	1.30756
	brain8R	2411.47	5211467	2161.11	3093174	1282.69	1.68483		brain8R	1207.57	3144996	2604.4	1918095	1588.39	1.63965			brain8R	1086.92	4460175	4103.49	3093801	2846.39	1.44165		brain8R	1572.27	3878426	2466.76	3042848	1935.32	1.2746
									brain9L	1211.74	3940741	3252.12	2038118	1681.97	1.93352			brain9L	1083.81	2780696	2565.68	2307598	2129.16	1.20502		brain9L	1705.8	3729975	2186.64	3431000	2011.37	1.08714
									brain9R	1467.89	4253920	2897.99	2306889	1571.57	1.84401			brain9R	1530.48	3652983	2386.82	3527066	2304.55	1.0357		brain9R	1017.28	3075426	3023.19	2806743	2759.07	1.09573
									brain10L	1295.11	3912759	3021.18	2498750	1929.37	1.56589			brain10L	2184.42	5013263	2295.01	4498538	2059.38	1.11442		brain10L	885.928	3637955	4106.38	2674492	3018.86	1.36024
									brain10R	1225.7	3874409	3160.96	2140871	1746.64	1.80973			brain10R	3006.46	5068622	1685.91	5502780	1830.32	0.921102		brain10R	1225.12	4883363	3986.04	3140025	2563.04	1.5552
									brain11L	1462.24	3220213	2202.25	2450536	1675.88	1.31409											brain11L	868.472	2341993	2696.68	1817220	2092.43	1.28878
									brain11R	1319.4	3544195	2686.22	2442891	1851.52	1.45082											brain11R	919.173	2577955	2804.65	2074429	2256.84	1.24273
																										brain12L	1328.58	3736064	2812.07	2883264	2170.18	1.29578
																										brain12R	853.225	2177887	2552.53	1896549	2222.8	1.14834
																										brain13L	1395.55	3864958	2769.5	3032349	2172.88	1.27458
																										brain13R	1310.08	3427469	2616.23	2720716	2076.76	1.25977

## Sheet: DL1
exposure cond	SOLVENT (E2-hex control)								E2-HEXENAL exposed									SOLVENT (2-but control)								2-BUTANONE exposed
n (brains)	8								11									10								13
		Volume ("area")	CD8gfp Int Density	Avg. Intensity/unit volume (CD8gfp)	nc82 Int Density	Avg. Intensity/unit volume (nc82)	Norm. CD8gfp			Volume ("area")	CD8gfp Int Density	Avg. Intensity/unit volume (CD8gfp)	nc82 Int Density	Avg. Intensity/unit volume (nc82)	Norm. CD8gfp				Volume ("area")	CD8gfp Int Density	Avg. Intensity/unit volume (CD8gfp)	nc82 Int Density	Avg. Intensity/unit volume (nc82)	Norm. CD8gfp			Volume ("area")	CD8gfp Int Density	Avg. Intensity/unit volume (CD8gfp)	nc82 Int Density	Avg. Intensity/unit volume (nc82)	Norm. CD8gfp
	brain1L	928.736	3089728	3326.81	2311670	2489.05	1.33658		brain1L	1385.39	4460885	3219.94	1630550	1176.96	2.73582			brain1L	1415.18	4958204	3503.58	2915562	2060.2	1.7006		brain1L	1219.19	4533176	3718.19	2755452	2260.07	1.64517
	brain1R	3382.92	5983354	1768.69	5488139	1622.31	1.09023		brain1R	872.537	3096615	3548.98	1126006	1290.5	2.75009			brain1R	1183.86	4761747	4022.21	2182678	1843.69	2.18161		brain1R	1092.34	3731095	3415.7	2169923	1986.5	1.71946
	brain2L	1430.69	5761364	4026.98	3875569	2708.88	1.48659		brain2L	1257.24	3130788	2490.2	2212131	1759.51	1.41528			brain2L	793.413	3066508	3864.96	1505537	1897.54	2.03682		brain2L	777.956	2734984	3515.6	1383713	1778.65	1.97655
	brain2R	1497.27	3979925	2658.12	3075882	2054.33	1.29391		brain2R	783.151	2414102	3082.55	1259429	1608.16	1.91682			brain2R	1060.42	3711367	3499.91	2024692	1909.33	1.83305		brain2R	694.358	2562629	3690.65	1261342	1816.56	2.03167
	brain3L	1190.79	2533189	2127.32	1696673	1424.83	1.49303		brain3L	928.736	3473846	3740.4	1781460	1918.16	1.95			brain3L	1228.73	3872297	3151.47	2275733	1852.11	1.70156		brain3L	1425.11	5897283	4138.13	2877846	2019.39	2.0492
	brain3R	606.639	1304987	2151.18	574557	947.116	2.27129		brain3R	3382.92	3070110	907.532	2333376	689.752	1.31574			brain3R	1267.14	3858120	3044.75	2150801	1697.37	1.79381		brain3R	1349.44	3760898	2787	2491670	1846.45	1.50939
	brain4L	1995.41	5091711	2551.71	2473900	1239.79	2.05817		brain4L	1032.95	3087797	2989.29	1871251	1811.56	1.65012			brain4L	1171.24	5028661	4293.46	2198862	1877.38	2.28694		brain4L	1094.7	4139050	3780.97	2752964	2514.8	1.50349
	brain4R	2143.3	4778311	2229.42	2012963	939.19	2.37377		brain4R	796.234	2583992	3245.27	1508282	1894.27	1.7132			brain4R	1315.41	4659950	3542.58	2687502	2043.09	1.73393		brain4R	1038.61	3832469	3689.98	1648620	1587.33	2.32465
	brain5L	1540.78	3406462	2210.86	3602718	2338.24	0.945526		brain5L	1493.59	4914822	3290.61	2493493	1669.46	1.97106			brain5L	1050.05	4084514	3889.81	2384527	2270.86	1.71292		brain5L	1199.46	3176976	2648.67	2009239	1675.12	1.58118
	brain5R	1542.73	3409810	2210.25	2469948	1601.03	1.38052		brain5R	1140.3	3335347	2924.97	1640548	1438.7	2.03307			brain5R	1097.36	3986936	3633.21	2671194	2434.2	1.49257		brain5R	1127.95	3620330	3209.65	2297342	2036.74	1.57588
	brain6L	1471.99	4879356	3314.8	3474597	2360.48	1.40429		brain6L	1102.8	2999524	2719.91	2461192	2231.76	1.21873			brain6L	1342.34	5552092	4136.12	2508265	1868.57	2.21352		brain6L	1653.89	4528849	2738.3	2717772	1643.26	1.66638
	brain6R	1078.37	4471726	4146.76	3212655	2979.19	1.39191		brain6R	1106.95	3066323	2770.07	2490677	2250.04	1.23112			brain6R	1571.37	5419012	3448.59	3774184	2401.84	1.43581		brain6R	2153.33	4091284	1899.98	3126231	1451.81	1.3087
	brain7L	1474.4	3262591	2212.83	2546105	1726.88	1.2814		brain7L	680.459	2802131	4118	1197706	1760.14	2.33958			brain7L	3208.76	6375219	1986.81	5249135	1635.87	1.21453		brain7L	782.798	2980228	3807.15	1199925	1532.87	2.48368
	brain7R	1561.58	4169102	2669.8	2290496	1466.78	1.82017		brain7R	786.637	3517072	4471.02	1972643	2507.69	1.78292			brain7R	1436.63	3838408	2671.82	2672569	1860.31	1.43622		brain7R	1022.83	2980638	2914.1	1798602	1758.45	1.6572
	brain8L	4487.28	9492778	2115.48	6429366	1432.8	1.47647		brain8L	1439.57	3819972	2653.55	2708536	1881.49	1.41035			brain8L	1223.92	5232879	4275.5	3256277	2660.53	1.60701		brain8L	523.452	1296457	2476.75	849896	1623.64	1.52543
	brain8R	2575.07	6527006	2534.69	3767190	1462.94	1.73259		brain8R	1421.4	3544647	2493.77	2477929	1743.3	1.43049			brain8R	944.615	3523134	3729.7	2356509	2494.68	1.49506		brain8R	1952.46	4948927	2534.71	3503883	1794.6	1.41241
									brain9L	789.947	2616443	3312.17	1432327	1813.19	1.82671			brain9L	914.32	2656169	2905.07	2152654	2354.38	1.2339		brain9L	1109.37	2249196	2027.45	2665342	2402.56	0.843868
									brain9R	1260.07	3738457	2966.87	2190081	1738.07	1.70699			brain9R	1395.11	3757743	2693.51	3356864	2406.16	1.11942		brain9R	1143.02	4052560	3545.49	3633533	3178.9	1.11532
									brain10L	1497.68	5183088	3460.74	3214493	2146.32	1.61241			brain10L	1884.81	4447315	2359.56	3714478	1970.74	1.19729		brain10L	1057.95	4478583	4233.27	3494967	3303.53	1.28144
									brain10R	1278.56	3931189	3074.7	2318642	1813.48	1.69547			brain10R	1017.86	2070545	2034.22	1762945	1732.01	1.17448		brain10R	1221.21	4887112	4001.87	3280428	2686.22	1.48978
									brain11L	1425.11	3144635	2206.59	2255719	1582.84	1.39407											brain11L	1567.35	3497812	2231.67	3116047	1988.1	1.12252
									brain11R	1349.44	3723525	2759.31	2168102	1606.67	1.71741											brain11R	1022.57	3048845	2981.56	2528383	2472.58	1.20585
																										brain12L	1825.6	4735361	2593.87	3936749	2156.42	1.20286
																										brain12R	918.774	2452549	2669.37	1965737	2139.52	1.24765
																										brain13L	1124.8	2934182	2608.62	2280541	2027.5	1.28662
																										brain13R	1122.7	2866337	2553.07	2425764	2160.65	1.18162

## Sheet: VL2a
exposure cond	SOLVENT (E2-hex control)								E2-HEXENAL exposed									SOLVENT (2-but control)								2-BUTANONE exposed
n (brains)	8								11									10								13
		Volume ("area")	CD8gfp Int Density	Avg. Intensity/unit volume (CD8gfp)	nc82 Int Density	Avg. Intensity/unit volume (nc82)	Norm. CD8gfp			Volume ("area")	CD8gfp Int Density	Avg. Intensity/unit volume (CD8gfp)	nc82 Int Density	Avg. Intensity/unit volume (nc82)	Norm. CD8gfp				Volume ("area")	CD8gfp Int Density	Avg. Intensity/unit volume (CD8gfp)	nc82 Int Density	Avg. Intensity/unit volume (nc82)	Norm. CD8gfp			Volume ("area")	CD8gfp Int Density	Avg. Intensity/unit volume (CD8gfp)	nc82 Int Density	Avg. Intensity/unit volume (nc82)	Norm. CD8gfp
	brain1L	1711.46	3663793	2140.74	2694026	1574.11	1.35997		brain1L	411.716	1395043	3388.36	569879	1384.16	2.44796			brain1L	2046.99	7540938	3683.91	4149912	2027.32	1.81713		brain1L	1913.65	6747845	3526.16	3687495	1926.94	1.82993
	brain1R	3922.95	4369329	1113.79	6667079	1699.51	0.655359		brain1R	771.43	2321517	3009.37	976410	1265.71	2.3776			brain1R	1356.08	5799816	4276.9	2535724	1869.89	2.28724		brain1R	2082.07	6663224	3200.29	3650919	1753.51	1.82508
	brain2L	2189.66	9037921	4127.55	5344429	2440.76	1.69109		brain2L	3150.28	7207302	2287.83	4777649	1516.58	1.50855			brain2L	1475.68	5938351	4024.13	2895673	1962.26	2.05077		brain2L	1516.78	5306519	3498.53	2775040	1829.55	1.91223
	brain2R	2390.44	8126775	3399.7	5215324	2181.74	1.55825		brain2R	2649.6	6385427	2409.96	3436613	1297.03	1.85806			brain2R	1782.46	6313427	3541.97	3329883	1868.14	1.89599		brain2R	1265.6	4872221	3849.75	2688904	2124.62	1.81197
	brain3L	849.642	1978682	2328.84	1336037	1572.47	1.48101		brain3L	1711.46	2473689	1445.37	1800409	1051.97	1.37396			brain3L	1744.99	5851948	3353.58	3545000	2031.53	1.65076		brain3L	1656.43	3195363	1929.07	1427275	861.66	2.23879
	brain3R	828.239	1986529	2398.5	1051333	1269.36	1.88953		brain3R	3922.95	3686655	939.766	1962679	500.307	1.87838			brain3R	1885.75	5588088	2963.32	3487907	1849.61	1.60213		brain3R	1921.82	4261459	2217.41	2603962	1354.95	1.63653
	brain4L	2309.24	4817942	2086.38	1992628	862.895	2.41788		brain4L	1195.89	3867229	3233.77	2371120	1982.73	1.63097			brain4L	2245.57	8344562	3716.01	4916074	2189.23	1.6974		brain4L	1633.16	5918703	3624.07	3981436	2437.87	1.48657
	brain4R	5628.58	9839286	1748.09	3880165	689.368	2.53579		brain4R	1303.17	4399962	3376.36	2737892	2100.95	1.60706			brain4R	1869.32	6847155	3662.9	3951793	2114.02	1.73267		brain4R	1303.36	4835102	3709.72	2011055	1542.98	2.40426
	brain5L	2456.77	6681308	2719.55	5669515	2307.71	1.17846		brain5L	1167.9	3602619	3084.7	1946183	1666.4	1.85112			brain5L	1385.52	5645953	4074.96	3307091	2386.89	1.70723		brain5L	1904.01	5434378	2854.18	3015010	1583.51	1.80244
	brain5R	2486.99	4285888	1723.32	5430477	2183.55	0.789229		brain5R	1418.27	4690748	3307.37	2308622	1627.77	2.03184			brain5R	1897.8	6451122	3399.26	4011414	2113.72	1.60819		brain5R	1550.82	4934279	3181.72	3005213	1937.82	1.64191
	brain6L	2348.04	8537506	3636.02	6147027	2617.94	1.38888		brain6L	1765.45	3127169	1771.32	2842217	1609.91	1.10026			brain6L	847.101	2974949	3511.92	1734056	2047.05	1.7156		brain6L	1718.52	5409159	3147.57	3176490	1848.39	1.70287
	brain6R	1928.58	7988424	4142.13	4863834	2521.98	1.64241		brain6R	1321.61	4218767	3192.14	3297804	2495.29	1.27927			brain6R	1533.17	4928376	3214.49	3163216	2063.18	1.55803		brain6R	2777.32	5850002	2106.35	3759043	1353.48	1.55625
	brain7L	1385.82	2984698	2153.75	3527534	2545.45	0.846115		brain7L	1964.78	7110997	3619.24	4189070	2132.09	1.69751			brain7L	3265.72	6778782	2075.74	5250125	1607.65	1.29117		brain7L	1274.2	4986026	3913.06	2238470	1756.76	2.22743
	brain7R	2434.82	7266087	2984.24	4714180	1936.15	1.54133		brain7R	1131	4728001	4180.35	2816604	2490.36	1.67862			brain7R	671.226	1353275	2016.13	717346	1068.71	1.8865		brain7R	1750.33	4314611	2465.03	2471754	1412.17	1.74557
	brain8L	9129.86	18100000	1982.51	13400000	1467.71	1.35075		brain8L	2058.04	5716748	2777.77	4322950	2100.52	1.32242			brain8L	2094.73	7605750	3630.9	4842933	2311.96	1.57048		brain8L	1681.86	3958932	2353.9	2707788	1609.99	1.46205
	brain8R	9135.94	20700000	2265.78	10800000	1182.14	1.91667		brain8R	2037.74	6186833	3036.12	4139421	2031.37	1.49461			brain8R	1355.97	5195401	3831.5	3576036	2637.25	1.45284		brain8R	2255	4806518	2131.49	3770082	1671.88	1.27491
									brain9L	1576.66	4949548	3139.27	3111120	1973.24	1.59092			brain9L	1934.64	4850392	2507.13	4198902	2170.38	1.15516		brain9L	2182.93	5275044	2416.5	5949312	2725.38	0.886665
									brain9R	1699.06	5036289	2964.16	2991643	1760.76	1.68345			brain9R	1777.07	4579495	2576.99	3523134	1982.55	1.29984		brain9R	1802.75	5671952	3146.28	4293268	2381.52	1.32113
									brain10L	1667.51	5665181	3397.4	3946717	2366.84	1.43542			brain10L	2589.44	6719143	2594.82	4487442	1732.97	1.49732		brain10L	1740.49	6140197	3527.85	5025341	2887.31	1.22185
									brain10R	1956.21	5614415	2870.04	3688362	1885.46	1.5222			brain10R	4982.39	7851292	1575.81	9091767	1824.78	0.863561		brain10R	1544.53	5869749	3800.34	3918961	2537.31	1.49778
									brain11L	1656.43	3033715	1831.48	3316828	2002.4	0.914643											brain11L	1561.12	4064237	2603.41	3574869	2289.94	1.13689
									brain11R	1921.82	5130215	2669.46	3663131	1906.08	1.4005											brain11R	1541.27	4548534	2951.15	3687323	2392.39	1.23356
																										brain12L	2392.98	5963864	2492.24	4932753	2061.34	1.20903
																										brain12R	1662.34	4411251	2653.64	3489633	2099.23	1.2641
																										brain13L	1805.43	4482446	2482.76	3590437	1988.69	1.24844
																										brain13R	1815.02	5031309	2772.03	3819939	2104.62	1.31712

## Sheet: DA1
exposure cond	SOLVENT (E2-hex control)								E2-HEXENAL exposed									SOLVENT (2-but control)								2-BUTANONE exposed
n (brains)	8								11									10								13
		Volume ("area")	CD8gfp Int Density	Avg. Intensity/unit volume (CD8gfp)	nc82 Int Density	Avg. Intensity/unit volume (nc82)	Norm. CD8gfp			Volume ("area")	CD8gfp Int Density	Avg. Intensity/unit volume (CD8gfp)	nc82 Int Density	Avg. Intensity/unit volume (nc82)	Norm. CD8gfp				Volume ("area")	CD8gfp Int Density	Avg. Intensity/unit volume (CD8gfp)	nc82 Int Density	Avg. Intensity/unit volume (nc82)	Norm. CD8gfp			Volume ("area")	CD8gfp Int Density	Avg. Intensity/unit volume (CD8gfp)	nc82 Int Density	Avg. Intensity/unit volume (nc82)	Norm. CD8gfp
	brain1L	3890.99	8996626	2312.17	9379776	2410.64	0.959151		brain1L	3782.24	8412572	2224.23	6816220	1802.16	1.2342			brain1L	4315.84	10700000	2479.24	8256185	1913	1.296		brain1L	3585.37	8738146	2437.17	8453697	2357.83	1.03365
	brain1R	853.955	1585752	1856.95	1581899	1852.44	1.00244		brain1R	2757.64	6613793	2398.36	4896599	1775.65	1.35069			brain1R	2551.42	7176483	2812.74	5212619	2043.03	1.37675		brain1R	3741.91	9230874	2466.89	7800214	2084.55	1.18341
	brain2L	2913.22	7493169	2572.13	8848375	3037.32	0.846841		brain2L	3785.53	7291200	1926.07	7988521	2110.28	0.91271			brain2L	3062.15	9544434	3116.9	7715492	2519.63	1.23705		brain2L	3111.21	8359788	2686.99	6551009	2105.61	1.27611
	brain2R	3993.17	8102285	2029.03	10279778	2574.34	0.788177		brain2R	2580.22	5691490	2205.82	5488084	2126.99	1.03706			brain2R	3220.35	8825911	2740.67	7164075	2224.63	1.23197		brain2R	2204.69	6540688	2966.72	5048481	2289.89	1.29558
	brain3L	4718.14	7011034	1485.98	6824116	1446.36	1.02739		brain3L	3890.99	1202107	308.946	1021384	262.5	1.17694			brain3L	4495.84	12700000	2824.83	10700000	2379.98	1.18692		brain3L	4197.25	13600000	3240.22	9379378	2234.65	1.44999
	brain3R	3021.42	5264556	1742.41	4393929	1454.26	1.19814		brain3R	853.955	4842853	5671.08	6590900	7718.08	0.734779			brain3R	3600.76	7595480	2109.41	8205511	2278.83	0.925656		brain3R	4370.13	4472001	1023.31	4499535	1029.61	0.993881
	brain4L	2590.21	2762831	1066.64	2505304	967.221	1.10279		brain4L	2564.47	6249789	2437.07	5139314	2004.04	1.21607			brain4L	3403.65	9376461	2754.83	9099006	2673.31	1.03049		brain4L	3547.93	9361794	2638.67	8686799	2448.42	1.0777
	brain4R	4302.54	5481566	1274.03	3944498	916.784	1.38967		brain4R	2160.63	4707668	2178.84	4380333	2027.34	1.07473			brain4R	3348.81	9164152	2736.54	8684941	2593.44	1.05518		brain4R	2276.95	6920626	3039.42	4622076	2029.94	1.4973
	brain5L	3528.41	6313199	1789.25	8225661	2331.27	0.767501		brain5L	4047.48	9616972	2376.04	7428748	1835.4	1.29456			brain5L	3154.04	9362780	2968.51	8259210	2618.62	1.13362		brain5L	4087.5	8897192	2176.68	7488034	1831.94	1.18819
	brain5R	4100.86	6913325	1685.83	8354528	2037.26	0.827494		brain5R	2382.2	4523454	1898.86	3995587	1677.27	1.13211			brain5R	3199.12	7998859	2500.33	7476101	2336.93	1.06992		brain5R	3519.49	6678663	1897.62	7248236	2059.46	0.921419
	brain6L	4403.56	11200000	2543.4	11200000	2543.4	1		brain6L	2858.89	5582319	1952.62	6691006	2340.42	0.834302			brain6L	2578.53	7853310	3045.65	5310630	2059.56	1.47879		brain6L	2600.01	4096685	1575.64	4502974	1731.9	0.909773
	brain6R	3157.45	9834896	3114.82	9994455	3165.36	0.984035		brain6R	2106.76	4979352	2363.51	5414503	2570.06	0.919632			brain6R	3265.46	7010247	2146.78	6454300	1976.53	1.08614		brain6R	2931.82	4757117	1622.58	4870029	1661.09	0.976815
	brain7L	4387.54	7491336	1707.41	10100000	2301.97	0.741716		brain7L	3047.14	9035970	2965.4	8018965	2631.64	1.12682			brain7L	7078.07	10500000	1483.46	11800000	1667.12	0.889831		brain7L	2401.08	6363701	2650.35	4435230	1847.18	1.43481
	brain7R	4067.82	8711163	2141.48	8874895	2181.73	0.981551		brain7R	2346.02	8608186	3669.27	7627427	3251.22	1.12858			brain7R	3408.85	6115070	1793.88	6827717	2002.94	0.895624		brain7R	3281.24	5878895	1791.67	5499888	1676.16	1.06891
	brain8L	9857.92	11500000	1166.57	15800000	1602.77	0.727848		brain8L	3675.78	7218691	1963.85	7573162	2060.29	0.953194			brain8L	3035.08	9510872	3133.65	9020361	2972.04	1.05438		brain8L	3513	4734985	1347.85	7782192	2215.25	0.608438
	brain8R	6239.49	9496945	1522.07	10600000	1698.86	0.895938		brain8R	3781.53	7332584	1939.05	7710061	2038.87	0.951041			brain8R	3281.07	10100000	3078.27	9616920	2931.04	1.05023		brain8R	4623.14	6227331	1346.99	9718557	2102.16	0.640767
									brain9L	3169.76	7788648	2457.18	6528445	2059.6	1.19303			brain9L	3860.63	6651837	1722.99	9134683	2366.11	0.728196		brain9L	3303.64	6694065	2026.27	9332371	2824.88	0.717295
									brain9R	3003.13	6679055	2224.03	5902520	1965.45	1.13156			brain9R	3779.8	6959039	1841.11	8312244	2199.12	0.837203		brain9R	2134.91	5677369	2659.3	7339045	3437.64	0.773584
									brain10L	4162.16	9658604	2320.57	10300000	2474.67	0.937729			brain10L	3819.31	5567418	1457.7	7954758	2082.78	0.699885		brain10L	2864.14	8151798	2846.16	9510527	3320.56	0.857134
									brain10R	3665.71	7702241	2101.16	7333906	2000.68	1.05022			brain10R	4134.27	3926045	949.635	8604194	2081.19	0.456294		brain10R	2930.7	8265612	2820.36	8005300	2731.53	1.03252
									brain11L	4197.25	6734287	1604.45	7838097	1867.44	0.859174											brain11L	2900.57	4149614	1430.62	7335194	2528.88	0.565713
									brain11R	4370.13	8637094	1976.39	9414034	2154.18	0.91747											brain11R	2570.76	4732030	1840.71	6463425	2514.21	0.732124
																										brain12L	3080.63	4755171	1543.57	6269118	2035.01	0.758507
																										brain12R	2551.49	4049943	1587.28	5125639	2008.88	0.790134
																										brain13L	3630.3	6046232	1665.49	8701450	2396.9	0.694853
																										brain13R	3676.98	6923406	1882.9	9120012	2480.3	0.759144

## Sheet: VA1d
exposure cond	SOLVENT (E2-hex control)								E2-HEXENAL exposed									SOLVENT (2-but control)								2-BUTANONE exposed
n (brains)	8								11									10								13
		Volume ("area")	CD8gfp Int Density	Avg. Intensity/unit volume (CD8gfp)	nc82 Int Density	Avg. Intensity/unit volume (nc82)	Norm. CD8gfp			Volume ("area")	CD8gfp Int Density	Avg. Intensity/unit volume (CD8gfp)	nc82 Int Density	Avg. Intensity/unit volume (nc82)	Norm. CD8gfp				Volume ("area")	CD8gfp Int Density	Avg. Intensity/unit volume (CD8gfp)	nc82 Int Density	Avg. Intensity/unit volume (nc82)	Norm. CD8gfp			Volume ("area")	CD8gfp Int Density	Avg. Intensity/unit volume (CD8gfp)	nc82 Int Density	Avg. Intensity/unit volume (nc82)	Norm. CD8gfp
	brain1L	2594.18	7174138	2765.47	7181844	2768.44	0.998927		brain1L	2739.87	8029296	2930.54	5273886	1924.87	1.52246			brain1L	3473.98	10400000	2993.69	8469046	2437.85	1.228		brain1L	3358.57	9620789	2864.55	8425463	2508.65	1.14187
	brain1R	2406.55	3990701	1658.27	5016587	2084.56	0.795501		brain1R	1058.74	3414591	3225.15	2104026	1987.29	1.62288			brain1R	2340.86	8282589	3538.26	5201429	2222.01	1.59237		brain1R	3394.29	9282233	2734.66	7386683	2176.21	1.25662
	brain2L	3215.24	10564790	3285.85	8932155	2778.07	1.18278		brain2L	2853.46	7254439	2542.33	6934303	2430.14	1.04617			brain2L	3036.04	10700000	3524.32	7101077	2338.92	1.50681		brain2L	2283.3	6458807	2828.72	4586435	2008.69	1.40824
	brain2R	3112.4	9496531	3051.19	9138266	2936.08	1.0392		brain2R	849.932	2238385	2633.61	1809315	2128.78	1.23714			brain2R	2426.54	7644204	3150.25	5507029	2269.5	1.38808		brain2R	2311.24	6685530	2892.62	4627358	2002.11	1.44478
	brain3L	3525.97	6402874	1815.92	5425823	1538.82	1.18007		brain3L	2594.18	1754094	676.165	1467773	565.795	1.19507			brain3L	3146.94	9542545	3032.33	7733393	2457.44	1.23394		brain3L	1327.1	11500000	8665.53	8084154	6091.61	1.42254
	brain3R	2874.5	6276248	2183.42	5015508	1744.83	1.25137		brain3R	2406.55	6120424	2543.24	6818826	2833.45	0.897577			brain3R	2734.36	7472691	2732.89	6616738	2419.85	1.12936		brain3R	2988.74	4827030	1615.07	4096379	1370.6	1.17837
	brain4L	2905.21	4280317	1473.32	3296473	1134.67	1.29845		brain4L	1967.28	4811857	2445.95	4294671	2183.05	1.12043			brain4L	3415.16	11000000	3220.93	9364736	2742.11	1.17462		brain4L	2904.35	8299285	2857.53	7540802	2596.38	1.10058
	brain4R	2764.87	3705623	1340.25	2652043	959.192	1.39727		brain4R	2189.88	5300235	2420.34	4483613	2047.43	1.18213			brain4R	2664.78	9055542	3398.23	7873435	2954.63	1.15014		brain4R	2285.2	7755334	3393.72	5311391	2324.26	1.46013
	brain5L	2638.08	5742346	2176.72	7026373	2663.45	0.817256		brain5L	3021.71	8647244	2861.7	6588045	2180.24	1.31257			brain5L	2063.42	6798890	3294.96	5293674	2565.49	1.28434		brain5L	3317.36	8566394	2582.29	7154213	2156.6	1.19739
	brain5R	2992.19	5960831	1992.13	6620012	2212.43	0.900426		brain5R	3305.94	8611810	2604.95	5832025	1764.11	1.47664			brain5R	1765.64	5060989	2866.37	4571272	2589.01	1.10713		brain5R	2590.22	6654134	2568.94	5861271	2262.84	1.13527
	brain6L	1598.82	5075128	3174.29	5980030	3740.28	0.848679		brain6L	2184.51	5368930	2457.72	5670862	2595.94	0.946757			brain6L	387.543	1046953	2701.51	765499	1975.26	1.36767		brain6L	2433.82	5243629	2154.48	5213889	2142.27	1.0057
	brain6R	2384.99	8507731	3567.2	7925241	3322.97	1.0735		brain6R	2143.12	3845211	1794.21	5688030	2654.09	0.676018			brain6R	2613.5	6239652	2387.47	5729125	2192.13	1.08911		brain6R	703.001	632084	899.123	1054027	1499.33	0.599685
	brain7L	3260.5	6867097	2106.15	8224734	2522.54	0.834932		brain7L	1518.19	5459062	3595.77	4356437	2869.5	1.2531			brain7L	4143.95	6936212	1673.82	7609507	1836.29	0.911519		brain7L	2379.52	7014551	2947.88	4871467	2047.25	1.43993
	brain7R	3423.24	9731437	2842.76	8058687	2354.11	1.20757		brain7R	2078.47	8673326	4172.93	6998487	3367.13	1.23931			brain7R	997.442	1880388	1885.21	2350591	2356.62	0.799964		brain7R	2432.57	5023797	2065.23	4372475	1797.47	1.14896
	brain8L	9535.18	13000000	1363.37	14400000	1510.2	0.902778		brain8L	3415.79	8355544	2446.15	8127753	2379.47	1.02803			brain8L	2455.09	9390286	3824.83	7912858	3223.04	1.18671		brain8L	2666.91	4879627	1829.69	6069140	2275.72	0.804006
	brain8R	4333.94	7535721	1738.77	6795270	1567.92	1.10897		brain8R	3046.06	8852366	2906.17	7537133	2474.39	1.1745			brain8R	2380.99	8831533	3709.18	7842090	3293.62	1.12617		brain8R	2181.09	3585919	1644.1	4622781	2119.49	0.775706
									brain9L	2908.97	8316102	2858.78	6891343	2369	1.20675			brain9L	3357.71	7248298	2158.7	8471027	2522.86	0.855658		brain9L	2558.01	6718761	2626.56	8421786	3292.32	0.797783
									brain9R	3260.14	8896119	2728.75	6985988	2142.85	1.27342			brain9R	1400.51	2727457	1947.48	3483990	2487.66	0.782854		brain9R	1154.75	3379390	2926.51	4432903	3838.84	0.762342
									brain10L	2900.16	8607457	2967.93	8085850	2788.07	1.06451			brain10L	3305.2	5743528	1737.73	7651385	2314.96	0.750652		brain10L	2437.16	7668533	3146.5	8082069	3316.18	0.948833
									brain10R	3040.69	8015390	2636.04	6905292	2270.96	1.16076			brain10R	4688.43	6250004	1333.07	10400000	2218.23	0.600962		brain10R	2194.95	6946460	3164.74	6300992	2870.67	1.10244
									brain11L	1327.1	2312860	1742.8	2842026	2141.54	0.813807											brain11L	1984.33	3878607	1954.62	5143175	2591.9	0.754127
									brain11R	2988.74	6804459	2276.7	7535567	2521.32	0.902979											brain11R	2587.92	5763830	2227.2	6876254	2657.05	0.838222
																										brain12L	2977.45	5688216	1910.43	6583640	2211.17	0.863993
																										brain12R	2965.68	6330298	2134.52	6969828	2350.16	0.908243
																										brain13L	2494.63	4984322	1998.02	6420919	2573.89	0.776263
																										brain13R	2688.09	6003191	2233.25	7272577	2705.48	0.825456

[truncated: 3 more sheets: DM6, VA2, VA3]
