# Supplementary material for: Chronic exposure to odors at naturally occurring concentrations triggers limited plasticity in early stages of Drosophila olfactory processing
Source: eLife. 2023 May 30;12:e85443. doi: 10.7554/eLife.85443 (PMC10229125; doi:10.7554/eLife.85443)
Supplement: Figure 5—source data 1. [file elife-85443-fig5-data1.xlsx]

## Sheet: Sheet1
VM7, depolarization (mV)
exposure cond.	solvent						2-butanone						E2-hexenal
n	6	6	6	7	5		3	7	6	7	6		2	2	4	3	3
stimulus, pentyl acetate + 2-butanone (log[conc])	-8	-7	-6	-5	-4		-8	-7	-6	-5	-4		-8	-7	-6	-5	-4
	11.3722	0.7328	13.1602	24.1172	27.8672		-0.6152	12.031	7.9334	22.6776	22.5696		9.4122	15.614	19.8988	32.058	30.1734
	1.3238	11.233	21.2948	24.6928	38.014		6.1002	-0.2508	14.9966	22.3032	37.9114		3.9374	2.5886	5.497	16.3694	16.9902
	5.6816	8.9556	26.6586	39.068	33.0648		-1.7106	9.4198	14.0744	35.91	28.7718				5.8626	23.2428	22.4358
	-3.687	2.6668	20.3524	33.6718	25.1912			10.6294	11.3944	27.827	24.4864				15.0536
	-4.0916	2.5036	14.9474	21.781	25.7666			2.087	19.5678	21.5242	32.1206
	4.4574	6.0016	14.5044	24.1674				10.1826	11.6934	31.2164	29.1364
				23.671				5.7562		25.6084
