# Supplementary material for: Chronic exposure to odors at naturally occurring concentrations triggers limited plasticity in early stages of Drosophila olfactory processing
Source: eLife. 2023 May 30;12:e85443. doi: 10.7554/eLife.85443 (PMC10229125; doi:10.7554/eLife.85443)
Supplement: Figure 6—source data 1. [file elife-85443-fig6-data1.xlsx]

## Sheet: Sheet1
ab4a, firing rate (Hz)
exposure cond.	solvent
n		9									9									9									8								8								9
stimulus, E2-hexenal (log[conc.])		solvent (0)	solvent (0)	solvent (0)	solvent (0)	solvent (0)	solvent (0)	solvent (0)	solvent (0)	solvent (0)	-12	-12	-12	-12	-12	-12	-12	-12	-12	-11	-11	-11	-11	-11	-11	-11	-11	-11	-10	-10	-10	-10	-10	-10	-10	-10	-9	-9	-9	-9	-9	-9	-9	-9	-8	-8	-8	-8	-8
time (s)
1.025		8	8	20	12	12	16	0	8	12	10	8	8	4	4	32	0	12	4	0	0	8	4	0	28	0	16	20	8	16	0	0	16	8	12	4	4	8	16	0	20	0	8	8	8	4	8	8	8
1.05		4	8	24	4	12	16	4	8	12	10	12	4	4	4	24	0	12	0	8	4	12	4	0	24	0	20	20	4	12	4	4	16	0	16	8	8	0	4	4	8	0	16	8	8	8	8	4	4
1.075		8	0	16	4	4	8	4	4	12	6.66667	8	4	0	4	8	0	16	0	12	8	12	0	0	20	0	16	12	0	16	8	8	20	8	16	16	8	8	4	8	4	0	8	4	0	8	4	0	8
1.1		12	4	4	4	4	16	4	0	8	6.66667	8	0	8	4	12	0	16	16	4	4	4	0	0	20	0	20	12	4	12	4	4	28	12	12	20	4	12	0	4	8	8	8	8	4	12	4	4	12
1.125		4	8	4	12	4	24	4	0	16	6.66667	8	16	8	0	20	0	8	24	12	0	8	8	4	20	4	16	24	8	4	0	4	28	4	12	12	4	8	0	0	20	12	16	4	4	12	4	8	12
1.15		0	16	8	16	8	12	4	0	16	10	12	20	0	0	12	0	4	16	12	4	8	12	8	24	16	8	16	4	4	4	8	20	0	8	8	4	4	0	4	28	4	16	4	0	12	8	8	8
1.175		0	12	12	8	12	12	4	0	12	13.3333	16	8	8	0	16	4	8	12	4	8	12	4	8	32	12	12	20	8	16	4	4	24	8	12	12	8	8	4	8	24	0	12	8	0	8	12	4	4
1.2		0	8	8	4	4	16	4	4	12	10	16	12	12	4	24	8	12	12	4	4	12	4	4	20	0	24	20	16	12	8	4	24	8	16	8	8	8	4	8	16	4	8	8	0	4	12	4	4
1.225		0	8	0	0	8	16	4	12	8	10	20	16	8	4	24	8	24	12	4	4	4	4	4	16	4	16	16	12	8	8	4	16	4	8	4	0	8	0	12	12	4	8	8	4	4	12	8	0
1.25		4	8	0	4	8	16	4	16	16	13.3333	12	12	4	0	20	4	16	4	4	4	4	12	4	24	4	8	12	8	12	0	8	16	12	20	12	4	8	0	8	20	4	16	4	8	16	8	8	0
1.275		8	16	4	8	0	8	4	20	32	13.3333	20	12	0	8	12	0	8	0	0	4	24	12	4	16	0	20	12	8	8	8	8	20	12	28	24	4	0	4	12	16	8	24	0	4	16	4	8	4
1.3		8	12	8	8	8	12	8	20	24	10	16	16	4	8	20	0	12	8	8	8	32	0	4	16	0	16	16	12	12	8	4	28	8	16	20	0	12	4	12	4	4	28	4	0	12	12	8	4
1.325		8	12	8	4	12	16	12	8	12	10	12	8	4	4	28	4	8	12	8	4	16	4	4	24	0	12	12	12	12	4	8	32	4	8	8	0	12	0	4	4	0	24	8	0	8	16	8	0
1.35		4	16	8	0	4	16	4	0	20	10	12	12	12	8	20	4	8	8	4	16	8	8	4	24	4	8	16	8	4	8	4	24	4	8	16	0	12	0	8	4	4	16	12	0	8	12	4	4
1.375		4	8	4	4	4	16	0	4	16	10	4	28	16	4	20	0	8	16	8	16	12	4	4	16	4	0	20	4	8	8	4	20	4	12	16	4	12	4	8	8	4	8	16	0	16	16	0	4
1.4		8	4	4	8	12	16	4	12	16	6.66667	8	20	20	0	20	0	4	16	4	0	16	8	4	16	0	8	8	4	20	4	4	20	0	20	16	8	4	8	8	16	4	4	12	8	8	16	4	0
1.425		8	4	8	4	12	16	4	8	24	13.3333	4	8	24	0	16	0	8	8	12	0	12	8	4	16	8	20	8	4	16	0	4	20	8	16	16	4	4	8	12	12	4	4	8	16	4	8	4	4
1.45		4	12	8	4	4	16	8	4	16	13.3333	12	8	12	4	20	8	16	8	12	0	12	4	8	12	12	16	16	4	8	12	8	24	8	12	4	4	0	16	8	8	0	8	8	12	8	8	4	4
1.475		4	16	8	8	0	24	8	12	12	10	16	16	8	4	20	8	16	20	0	0	12	12	4	12	4	12	12	12	16	12	8	24	0	12	0	8	8	12	8	20	4	12	4	4	20	16	8	8
1.5		4	4	4	4	8	24	8	8	8	10	20	12	8	12	24	0	12	20	4	8	16	12	0	16	4	8	4	20	24	0	12	24	0	8	4	8	8	8	12	20	4	16	0	0	16	16	4	8
1.525		4	12	4	4	8	16	16	4	8	6.66667	20	0	4	16	28	8	8	12	8	16	12	8	4	20	8	8	0	12	20	0	12	16	0	12	8	4	0	12	8	16	4	24	8	0	8	16	0	12
1.55		8	12	4	4	4	24	8	12	8	10	8	8	0	4	16	8	8	16	20	12	12	4	8	24	8	20	0	0	4	4	4	24	0	24	8	8	12	4	4	16	8	16	12	0	8	12	0	12
1.575		8	8	4	0	4	16	8	20	4	6.66667	20	8	0	0	12	8	8	20	24	8	16	0	8	20	4	12	8	4	8	4	4	36	4	28	12	8	24	0	4	4	12	8	4	0	4	8	0	4
1.6		12	12	4	0	0	8	12	16	8	6.66667	16	8	0	0	16	8	8	20	8	4	24	0	4	12	4	4	8	4	12	8	4	28	4	20	20	4	16	4	0	16	12	4	4	0	16	16	0	8
1.625		16	8	4	4	8	12	8	8	12	6.66667	4	12	0	4	16	0	8	12	0	0	28	4	4	20	4	12	8	4	16	8	8	20	0	12	20	8	8	12	0	20	4	0	4	0	24	16	12	4
1.65		8	4	4	8	12	20	8	16	16	6.66667	4	12	0	4	24	0	16	12	4	8	12	4	4	16	4	16	20	4	16	4	8	16	4	16	16	8	8	8	0	12	8	0	0	0	24	4	12	0
1.675		0	16	4	8	4	20	8	12	12	10	4	8	0	0	20	0	12	12	8	8	16	4	4	12	4	16	16	4	8	4	4	16	12	24	12	12	4	0	4	20	8	8	0	0	12	8	4	4
1.7		0	24	4	8	0	8	4	8	12	10	16	0	0	0	16	0	8	8	4	0	20	4	8	16	0	8	8	8	20	4	12	24	12	20	4	12	8	4	8	20	8	8	0	0	0	8	4	8
1.725		8	24	0	8	12	4	4	12	12	3.33333	12	8	0	4	24	0	16	8	0	4	8	0	4	12	0	4	8	8	20	0	8	28	4	16	0	12	8	4	12	12	8	12	4	12	12	4	4	12
1.75		8	20	4	4	12	12	4	12	12	3.33333	8	16	4	4	16	0	8	12	8	8	4	8	8	12	0	8	8	8	12	4	4	20	0	16	8	8	0	4	12	12	0	16	8	24	16	4	4	12
1.775		4	8	8	0	0	20	8	12	12	10	8	8	8	0	12	4	8	20	12	4	12	8	8	16	4	12	12	4	16	8	8	16	8	16	8	4	8	4	4	20	0	4	4	12	8	16	4	4
1.8		8	12	16	4	4	24	8	8	4	13.3333	0	0	4	4	12	8	12	20	8	4	12	8	0	16	4	8	12	12	12	12	4	24	8	8	4	8	8	0	4	16	8	8	4	4	4	24	4	4
1.825		8	16	16	4	12	28	0	12	0	10	4	4	4	8	16	8	20	20	8	4	4	8	4	24	0	8	4	12	4	12	0	28	8	12	8	4	0	8	4	20	20	12	12	8	8	12	0	8
1.85		8	16	4	4	8	24	4	12	12	6.66667	16	16	8	8	16	4	16	12	8	0	16	0	8	24	0	24	8	8	8	8	4	24	8	16	8	8	4	12	4	28	12	12	8	8	12	4	0	4
1.875		12	16	0	8	12	20	4	8	20	6.66667	16	12	8	4	16	4	12	12	8	0	16	4	12	12	0	28	12	8	20	8	4	20	0	20	4	8	8	8	12	20	0	24	8	8	4	16	0	4
1.9		12	20	8	12	12	20	0	12	12	3.33333	12	8	4	0	20	4	16	20	8	0	12	4	8	16	0	20	16	0	16	8	8	12	4	24	8	4	8	8	12	12	4	20	12	8	0	24	4	4
1.925		8	16	16	16	4	16	0	8	16	10	16	16	0	8	16	4	4	12	4	4	12	8	8	32	0	16	12	8	12	8	8	12	4	20	16	4	12	8	4	12	4	12	4	4	0	20	4	0
1.95		12	8	16	8	4	16	0	12	20	16.6667	12	12	0	8	12	4	0	8	4	8	12	12	16	28	4	8	4	8	12	4	4	24	0	12	12	4	12	8	0	16	8	16	4	0	0	16	0	0
1.975		8	8	8	8	0	28	4	24	16	10	8	12	4	4	16	4	12	8	8	4	8	4	8	16	8	4	12	8	4	4	12	20	0	16	16	12	8	8	4	12	12	16	8	4	4	8	0	4
2		0	8	0	16	4	20	8	20	12	10	4	16	8	4	20	4	24	8	12	0	16	4	4	16	4	8	20	8	4	8	12	20	0	20	12	12	8	12	8	12	8	16	12	4	4	8	4	4
2.025		8	12	4	8	4	8	4	16	8	6.66667	12	12	12	0	20	0	16	16	12	0	24	8	4	8	0	8	20	4	16	4	4	16	4	8	8	8	8	16	8	20	8	16	8	0	0	4	4	4
2.05		12	16	16	4	4	20	4	12	16	6.66667	16	12	8	4	16	8	4	20	8	8	12	4	4	12	0	8	16	8	12	12	4	12	4	12	16	8	12	8	12	16	8	20	0	0	0	4	4	8
2.075		8	16	12	12	8	20	8	12	16	13.3333	8	8	4	4	24	8	4	12	16	8	12	4	4	20	4	4	20	8	12	16	4	16	4	20	16	8	8	16	16	12	8	12	4	0	4	4	8	4
2.1		8	16	4	16	4	20	8	12	8	13.3333	8	12	8	8	28	8	8	8	12	0	12	8	0	20	4	4	12	4	20	8	4	12	8	12	12	4	0	20	8	16	8	0	4	0	16	16	4	8
2.125		4	8	4	8	8	16	8	16	20	10	8	16	8	8	20	8	8	8	4	0	4	12	4	12	0	8	8	4	8	12	4	20	8	12	8	8	4	12	4	20	8	4	0	4	12	16	0	8
2.15		0	8	0	4	8	16	4	20	28	6.66667	20	4	4	0	24	4	4	8	12	0	4	16	4	12	4	12	12	4	4	8	4	20	4	20	8	16	12	12	8	24	16	8	4	4	0	8	4	4
2.175		8	8	12	4	0	24	0	12	16	6.66667	20	12	8	0	24	8	16	12	12	12	16	12	4	20	4	16	8	4	12	4	4	16	0	12	8	12	8	8	4	20	12	8	4	0	0	12	12	8
2.2		16	8	16	4	4	20	4	12	8	3.33333	12	16	8	0	20	8	24	12	4	16	12	8	12	12	4	8	12	12	28	8	4	16	4	8	8	4	4	0	4	16	0	20	0	0	4	12	8	8
2.225		8	12	12	8	8	12	8	20	4	3.33333	12	12	0	0	20	12	12	12	8	8	8	8	12	20	8	4	20	8	24	8	4	12	4	12	8	4	8	8	8	24	8	28	8	0	8	8	4	8
2.25		0	8	16	8	4	12	8	16	8	10	16	20	0	8	16	8	16	20	12	8	8	8	4	20	4	12	20	4	4	8	4	12	4	16	8	8	4	16	8	24	8	16	8	0	12	12	8	12
2.275		4	12	12	4	4	20	12	12	20	10	16	16	4	12	12	8	12	12	4	8	4	4	8	12	8	16	12	4	4	12	8	20	0	12	16	8	4	8	4	16	0	4	0	4	12	24	20	8
2.3		8	16	8	4	4	12	8	16	16	13.3333	8	12	8	4	12	8	8	12	8	8	8	4	12	12	16	16	12	4	12	16	8	20	0	12	24	4	8	0	8	16	4	8	4	4	12	16	16	8
2.325		8	12	8	8	0	20	4	16	8	10	4	16	12	4	12	8	8	16	12	4	4	8	8	8	8	12	12	4	20	20	8	20	0	16	20	0	12	4	8	20	4	16	8	4	12	16	4	12
2.35		8	8	12	4	0	16	4	12	8	3.33333	12	12	8	4	20	4	8	8	4	8	16	4	4	12	0	16	16	0	24	16	8	20	4	12	16	0	8	4	0	16	8	8	4	4	4	12	4	8
2.375		8	20	8	0	4	12	4	8	4	3.33333	16	8	0	0	16	0	12	12	8	12	16	0	4	24	4	20	16	4	12	8	8	24	16	4	8	4	4	4	0	28	8	0	4	4	12	12	8	8
2.4		4	24	8	8	4	16	12	8	0	0	8	16	4	0	16	4	12	12	8	12	8	0	12	20	4	8	12	4	12	8	8	24	12	4	12	12	12	4	0	28	4	8	8	4	12	20	12	4
2.425		0	12	12	8	0	8	8	16	0	6.66667	8	24	8	0	20	8	12	4	0	8	20	0	8	12	0	8	12	0	24	4	8	16	0	4	20	12	20	4	12	28	4	12	8	0	8	16	4	4
2.45		4	16	8	4	0	4	0	24	8	6.66667	12	16	4	8	16	4	12	8	0	4	16	8	8	12	0	20	8	0	12	4	8	16	4	12	8	4	12	16	12	24	8	4	8	8	12	12	0	4
2.475		4	20	8	8	8	4	0	16	16	10	20	8	8	12	24	0	8	12	0	4	12	12	8	16	0	20	8	4	4	8	12	16	4	16	4	0	8	16	12	24	12	8	8	8	12	4	8	8
2.5		0	20	8	8	8	24	8	16	12	13.3333	16	8	12	4	28	0	4	12	8	4	24	12	8	32	4	16	4	4	16	12	16	16	0	16	16	4	12	4	12	24	12	8	8	0	12	12	8	12
2.525		0	20	12	4	12	28	12	12	16	10	12	12	8	0	24	0	12	16	16	8	20	8	8	24	8	12	4	8	12	12	8	12	0	16	16	4	16	0	4	24	8	0	8	4	8	20	4	8
2.55		0	12	16	4	12	20	16	4	16	10	20	16	4	0	24	4	12	16	12	12	8	4	0	8	4	12	12	8	12	8	4	8	8	16	12	12	20	8	4	24	0	4	8	8	12	20	12	8
2.575		0	8	8	8	0	24	12	8	12	10	24	12	4	8	16	4	8	16	12	8	16	12	4	12	0	20	8	8	12	4	4	12	8	16	12	20	8	12	8	16	0	8	12	4	20	16	8	8
2.6		4	20	4	4	0	16	0	8	20	6.66667	16	8	4	8	16	0	8	12	12	0	20	16	8	20	0	20	8	8	4	4	4	16	8	16	8	12	4	8	8	24	4	12	8	4	12	4	0	4
2.625		8	20	8	12	0	12	0	4	16	6.66667	8	8	8	0	24	4	8	16	4	0	12	8	4	24	0	8	16	8	4	12	8	24	8	12	12	4	8	4	12	16	8	12	8	4	8	12	0	8
2.65		4	12	12	16	0	12	4	8	8	13.3333	8	4	8	0	24	4	12	20	0	0	8	0	4	24	8	12	16	12	4	16	12	20	4	12	8	0	8	12	16	8	4	12	8	4	16	12	8	12
2.675		8	12	16	8	0	8	4	12	16	10	12	0	8	0	20	0	16	12	8	0	8	0	8	20	8	16	16	4	8	8	12	16	4	20	0	4	12	12	12	16	0	12	16	4	16	12	8	4
2.7		12	4	8	4	4	8	4	16	12	6.66667	12	8	12	4	16	0	12	12	8	0	16	0	4	20	0	8	16	16	8	0	4	24	8	8	4	4	12	4	8	20	0	12	12	0	12	12	0	12
2.725		8	4	8	0	12	16	4	16	8	13.3333	12	12	4	8	12	4	20	20	0	4	24	4	4	20	4	8	20	20	8	0	4	12	12	8	12	8	4	8	12	16	4	20	4	0	4	4	4	12
2.75		4	8	12	4	8	20	4	4	8	13.3333	16	12	4	4	8	4	20	24	0	8	24	4	4	24	8	12	16	16	8	8	4	12	12	8	12	8	0	8	12	12	8	16	8	0	4	4	4	8
2.775		4	12	12	16	0	12	4	8	8	3.33333	12	8	4	8	12	4	8	16	0	4	20	4	4	20	4	12	8	16	12	8	0	24	16	12	8	12	4	16	8	20	12	12	8	0	8	8	4	12
2.8		4	12	12	16	0	8	0	8	12	3.33333	4	0	4	8	20	4	4	8	4	12	12	12	8	20	4	12	4	12	20	0	0	24	8	12	16	12	4	12	4	16	8	8	4	0	4	12	4	4
2.825		0	16	4	8	4	12	4	0	8	6.66667	4	4	12	4	24	4	8	8	16	12	12	8	8	32	8	16	0	12	12	4	0	16	0	8	20	12	4	4	4	12	4	12	4	4	4	4	0	0
2.85		0	16	12	4	4	24	4	4	8	6.66667	4	8	8	4	20	4	16	8	12	8	20	8	12	24	4	16	4	8	4	8	0	16	0	8	12	16	12	8	8	20	4	16	4	4	8	4	0	4
2.875		4	12	20	8	4	24	8	12	8	10	12	8	0	16	12	4	12	4	4	8	20	8	12	16	4	16	12	8	8	4	4	12	4	12	16	8	12	8	4	32	4	12	0	0	12	20	4	4
2.9		8	8	16	8	4	16	8	12	16	10	20	8	8	16	12	12	8	0	8	4	12	4	4	12	8	16	12	8	12	4	12	8	4	16	20	4	8	4	4	28	8	16	8	0	8	16	4	4
2.925		8	8	8	4	0	20	4	8	12	6.66667	12	4	8	4	16	12	12	0	8	4	12	8	0	20	8	16	8	0	12	4	16	20	0	4	8	4	20	0	8	24	8	16	8	4	4	8	0	12
2.95		8	20	8	8	4	16	8	12	8	10	12	0	8	4	24	8	16	8	8	4	12	4	12	32	4	12	8	4	12	0	16	24	0	4	8	8	20	4	8	24	8	24	4	4	8	20	4	12
2.975		8	24	8	4	8	20	16	16	12	16.6667	8	4	8	0	28	4	12	8	4	12	8	0	12	16	0	16	8	8	12	0	12	28	4	8	8	8	4	8	12	16	4	24	8	0	12	12	4	4
3		16	20	4	0	4	24	16	8	16	20	8	12	4	0	28	0	8	8	0	16	4	4	4	16	0	28	8	4	12	4	8	20	4	8	0	4	12	4	12	12	0	20	4	4	12	12	4	4
3.025		16	16	4	0	4	24	4	12	20	16.6667	16	12	4	0	24	8	4	16	4	4	4	8	16	28	4	16	12	4	12	4	4	12	4	8	4	0	20	0	8	12	0	24	4	4	16	16	4	4
3.05		4	20	4	0	4	32	8	20	8	6.66667	16	4	0	0	28	8	8	16	12	4	16	4	16	20	12	8	8	8	4	0	0	16	8	8	12	4	12	4	8	12	4	16	4	0	20	12	0	0
3.075		4	12	4	0	0	20	8	8	0	6.66667	12	8	4	0	24	4	12	12	16	4	16	0	8	16	8	8	4	4	8	4	4	20	4	12	8	8	8	4	4	20	4	8	0	4	16	16	0	0
3.1		4	12	0	4	0	24	4	12	8	13.3333	12	8	12	12	16	4	16	8	8	4	12	0	8	20	0	8	4	4	8	4	8	12	4	24	4	4	4	0	4	20	4	8	4	4	12	12	0	0
3.125		0	16	8	8	0	24	16	12	16	10	16	12	8	12	12	8	24	12	4	4	12	0	8	16	0	20	4	4	8	0	8	16	4	16	8	0	8	4	4	16	8	8	8	8	4	12	4	4
3.15		4	8	16	8	4	16	12	8	16	6.66667	16	16	8	8	16	8	12	8	8	0	12	0	8	16	8	12	4	4	16	0	8	12	4	8	8	0	8	12	0	20	4	16	4	12	8	12	8	4
3.175		16	8	12	4	4	20	4	12	8	3.33333	16	8	12	16	16	4	4	4	12	0	16	4	12	24	8	8	4	8	8	4	4	12	8	12	4	0	8	8	4	24	4	20	4	8	12	16	12	4
3.2		12	16	4	0	8	16	8	4	4	6.66667	12	8	8	12	8	4	8	28	12	4	8	4	12	12	8	16	8	12	4	4	0	16	4	4	4	0	12	0	4	32	4	16	8	4	4	12	16	8
3.225		8	20	4	4	8	16	4	4	8	6.66667	8	12	12	16	20	4	4	24	8	4	16	0	12	16	8	12	12	16	12	4	0	16	0	8	8	12	4	8	0	24	4	20	8	4	8	4	12	4
3.25		12	8	12	4	0	12	0	8	8	3.33333	8	8	8	12	20	4	8	8	12	0	24	8	8	36	0	4	8	8	20	4	0	12	0	8	8	12	8	8	4	16	8	24	8	8	12	8	8	0
3.275		8	0	12	4	0	16	4	8	8	6.66667	8	4	8	8	20	4	12	12	16	0	8	12	0	24	0	8	12	0	16	0	4	12	8	4	8	0	12	4	12	16	4	16	4	4	4	12	8	8
3.3		4	12	8	4	4	16	4	20	8	10	12	12	12	8	28	4	8	12	12	4	4	8	4	8	4	12	16	12	4	4	8	20	8	12	8	8	8	12	8	16	4	16	8	0	4	12	12	8
3.325		4	20	16	0	4	8	4	16	8	13.3333	8	16	8	4	12	8	8	16	4	16	20	8	8	12	8	8	12	24	8	8	4	24	0	12	12	8	12	8	0	20	4	12	12	0	8	8	8	4
3.35		12	16	16	4	8	4	4	4	16	10	12	12	8	8	16	8	12	28	12	16	16	4	12	12	8	8	8	20	16	8	8	20	8	8	12	4	12	4	12	12	0	8	4	0	8	8	0	4
3.375		12	12	4	12	8	8	4	8	16	13.3333	12	16	8	8	24	4	12	16	20	4	12	8	8	20	12	8	4	8	20	8	8	16	8	8	12	4	4	8	12	16	0	12	12	0	12	4	0	4
3.4		4	8	8	12	4	16	4	8	12	6.66667	4	20	4	12	12	4	8	0	12	12	12	8	4	16	12	4	12	4	16	4	8	16	0	8	16	0	4	4	0	20	0	12	16	0	12	4	8	4
3.425		8	12	12	12	4	24	4	4	16	3.33333	4	16	12	8	16	4	4	4	4	16	8	0	12	8	8	12	16	4	16	0	12	8	4	12	24	0	4	0	4	16	8	16	8	0	12	4	8	0
3.45		8	8	16	20	4	28	8	0	8	13.3333	4	20	16	8	20	4	8	4	4	8	16	4	12	8	4	20	12	0	24	0	4	8	12	16	20	4	8	0	4	16	8	16	8	4	16	4	4	4
3.475		4	4	20	16	4	16	8	4	8	16.6667	12	16	4	8	16	4	8	8	8	8	20	12	8	16	0	8	12	12	12	0	0	24	8	8	4	12	16	4	4	20	0	12	12	4	8	8	4	4
3.5		8	8	20	12	4	16	8	8	16	13.3333	12	4	0	0	16	8	0	8	4	8	16	16	8	20	0	4	16	16	8	4	4	28	0	4	8	12	12	4	4	28	4	16	8	0	12	8	12	4
3.525		8	12	16	12	12	16	8	8	12	16.6667	8	8	4	8	20	8	4	4	8	8	12	12	8	20	0	8	20	8	16	8	4	24	4	8	8	8	4	4	0	16	4	20	4	0	16	4	12	8
3.55		4	16	12	12	12	12	8	8	4	10	4	12	4	8	16	4	12	8	8	4	16	8	8	28	0	12	20	4	16	4	4	20	8	4	4	4	0	4	4	12	0	12	8	0	4	4	0	8
3.575		4	8	12	12	8	20	8	12	12	3.33333	4	12	0	4	16	0	16	12	4	12	12	8	4	28	0	8	16	4	16	4	4	12	8	0	8	4	0	4	12	24	4	8	8	0	0	4	12	12
3.6		4	16	4	16	12	24	4	8	24	10	8	8	4	4	20	4	12	20	12	12	4	8	4	28	0	8	16	4	16	4	0	20	4	4	16	16	8	4	16	20	8	8	4	0	4	8	16	4
3.625		8	28	12	12	8	16	4	12	20	13.3333	12	8	16	4	16	8	12	24	12	0	4	12	8	20	4	16	16	0	12	12	0	24	4	4	16	16	12	8	12	8	4	8	4	4	12	20	4	4
3.65		8	20	12	8	0	16	12	24	16	6.66667	16	12	12	12	20	4	12	24	12	0	16	12	16	20	8	20	20	0	12	12	8	16	8	4	4	4	8	8	4	20	4	4	12	4	12	16	4	8
3.675		4	20	4	12	4	16	8	24	8	13.3333	12	12	0	8	24	0	16	16	16	0	16	8	12	20	12	20	16	4	20	8	8	20	4	8	8	8	8	4	8	24	4	0	12	0	4	8	4	4
3.7		12	16	8	4	4	8	0	12	0	16.6667	12	20	0	8	16	0	16	12	12	4	12	8	0	16	8	20	8	4	20	16	0	16	0	12	8	8	4	8	12	20	0	8	8	0	8	8	0	4
3.725		12	12	16	4	8	16	0	12	4	16.6667	12	20	4	8	8	0	4	16	12	8	12	4	4	20	4	24	12	8	8	8	4	20	0	12	12	4	8	8	8	16	8	12	12	4	16	12	4	4
3.75		4	20	12	4	8	20	0	16	16	23.3333	8	12	12	4	12	0	8	24	12	4	12	4	4	24	8	12	20	12	4	0	8	24	4	12	20	4	8	4	4	20	8	16	8	8	8	8	4	0
3.775		4	20	0	4	0	16	0	12	20	16.6667	12	12	12	8	16	0	12	24	8	12	16	8	8	28	4	8	20	4	4	0	12	16	8	16	12	0	4	8	4	20	4	24	0	8	4	8	4	0
3.8		4	12	8	4	4	20	4	12	20	10	8	12	8	8	12	0	12	8	8	12	16	8	8	32	4	24	16	0	8	0	8	24	4	20	8	4	4	12	4	12	4	20	0	4	4	16	4	0
3.825		0	16	16	8	8	20	4	12	12	13.3333	0	4	12	4	16	0	12	8	4	4	20	4	8	32	8	28	12	4	12	0	0	24	0	16	8	8	12	8	0	20	4	8	4	0	4	8	4	0
3.85		8	12	8	8	4	12	0	12	0	6.66667	4	4	8	4	28	0	12	8	12	4	16	4	8	24	8	20	8	8	16	0	0	20	0	8	8	4	16	8	0	20	8	12	8	0	8	4	4	0
3.875		12	12	4	0	12	4	0	12	4	3.33333	12	8	8	4	24	4	8	8	12	12	4	8	0	16	8	16	12	4	16	4	4	16	4	20	12	12	8	12	0	16	12	16	16	8	8	12	0	4
3.9		8	20	4	4	12	20	12	12	8	13.3333	8	8	8	0	24	4	12	16	8	12	8	4	0	24	8	12	12	0	16	8	8	12	4	24	8	16	12	12	8	24	8	8	12	8	8	16	8	4
3.925		8	20	8	8	8	24	16	12	16	16.6667	8	12	4	0	24	0	16	20	12	4	8	0	4	16	8	20	20	4	20	8	8	16	4	16	4	8	20	12	8	24	0	8	0	0	8	16	8	12
3.95		4	24	12	4	16	12	16	12	20	10	12	8	8	0	16	0	12	12	8	12	4	4	4	12	4	24	28	8	16	8	8	16	12	12	12	4	12	12	4	20	0	12	4	4	8	8	4	16
3.975		4	20	4	8	8	20	16	8	12	6.66667	12	4	4	0	20	0	8	4	4	8	8	4	0	28	4	12	20	12	12	4	8	16	8	4	8	4	12	8	4	16	0	20	4	4	8	4	4	8
4		4	16	8	12	0	32	8	12	8	10	12	8	4	0	24	0	12	8	4	4	12	0	4	16	4	12	8	12	8	0	4	16	8	8	4	8	24	4	12	12	12	16	4	0	8	4	0	4
4.025		0	12	12	4	0	24	4	12	8	13.3333	8	8	4	4	24	4	16	8	4	4	12	4	8	8	8	16	12	4	8	4	4	12	8	8	8	8	12	0	12	28	12	12	8	0	12	4	4	8
4.05		0	12	8	4	4	20	0	16	8	13.3333	8	8	0	8	20	4	8	8	4	0	8	4	4	20	12	8	20	0	12	8	8	8	0	4	8	4	0	0	4	24	8	16	4	0	16	4	4	24
4.075		0	16	12	4	4	24	0	16	12	10	8	12	0	8	24	4	4	8	4	8	12	8	8	20	4	4	16	8	8	4	8	16	0	8	8	4	4	4	8	20	8	12	8	4	12	4	4	20
4.1		4	16	8	4	4	20	8	8	16	10	12	8	8	8	28	4	12	4	4	8	8	8	16	20	12	8	20	8	0	12	8	20	4	8	8	8	12	4	4	20	0	12	12	8	12	8	4	12
4.125		4	16	4	4	8	12	8	8	16	10	20	0	12	8	24	0	16	8	4	4	0	0	12	16	12	8	16	0	8	12	4	20	4	16	12	8	8	0	4	12	0	20	4	4	12	8	0	8
4.15		0	16	4	0	8	20	8	8	24	6.66667	20	8	8	4	24	8	12	16	4	8	12	8	8	12	4	12	8	0	12	4	0	16	8	16	12	4	4	8	4	24	0	20	0	0	12	8	4	0
4.175		0	12	4	4	8	20	8	8	20	13.3333	12	12	12	4	20	12	12	8	4	8	16	8	4	16	12	12	16	0	12	8	0	12	12	8	8	0	12	8	4	32	0	16	4	4	12	20	4	8
4.2		4	4	8	4	8	12	4	8	4	13.3333	12	12	8	12	28	8	8	8	0	8	12	0	4	16	8	8	20	4	12	4	4	12	4	16	4	0	12	8	4	24	4	16	4	8	8	20	8	8
4.225		12	8	4	8	4	16	4	16	12	13.3333	16	24	4	12	32	8	4	12	4	12	20	0	8	20	4	8	12	12	8	0	8	24	8	16	0	0	8	8	4	20	4	8	0	4	4	8	12	8
4.25		8	16	8	16	8	16	0	12	20	10	24	20	8	4	24	8	0	12	4	12	12	4	8	12	8	12	4	8	4	0	12	32	12	8	4	0	12	8	8	24	4	12	4	4	8	12	4	8
4.275		4	8	8	8	12	16	4	8	16	3.33333	24	8	12	4	12	12	4	24	8	8	8	4	8	8	4	16	8	4	0	4	8	16	12	8	12	4	12	8	12	16	8	16	12	4	8	16	4	12
4.3		8	8	4	0	4	28	8	16	12	6.66667	12	8	16	8	8	12	4	20	16	12	16	4	12	12	4	12	12	8	4	12	8	8	12	4	20	4	12	0	8	16	8	12	8	4	12	8	8	12
4.325		8	8	4	4	4	24	8	12	8	3.33333	4	4	12	4	16	4	8	16	12	12	8	8	8	16	4	8	4	4	16	20	8	12	4	8	16	0	8	0	8	16	12	20	0	4	12	12	4	8
4.35		8	12	8	8	8	12	8	12	4	13.3333	8	8	12	4	20	4	12	12	4	8	8	8	0	28	0	4	4	4	12	12	4	12	4	8	4	4	0	0	4	12	8	16	12	0	4	12	0	12
4.375		4	12	16	4	4	20	16	12	0	20	16	16	16	4	16	4	12	4	4	12	12	8	0	16	4	4	8	12	0	4	8	20	4	4	4	4	0	0	4	12	0	4	16	8	8	8	4	8
4.4		0	12	12	0	0	16	12	16	16	13.3333	12	16	8	4	12	0	16	4	12	8	12	8	0	12	8	8	8	16	4	4	8	20	4	12	8	0	0	4	8	12	0	8	8	8	12	12	4	8
4.425		8	16	16	0	4	16	4	12	24	6.66667	16	12	0	12	20	0	12	4	12	0	12	4	0	16	4	20	8	8	8	4	8	4	12	16	8	0	4	4	8	24	0	16	12	0	8	12	0	16
4.45		12	12	16	16	4	24	8	8	16	0	16	12	8	8	20	4	4	20	8	4	8	8	4	16	0	20	8	0	4	8	4	8	8	12	12	4	8	0	8	24	4	24	8	0	0	8	8	12
4.475		4	16	8	16	0	16	4	16	12	10	20	8	12	4	12	16	12	24	12	4	12	16	8	20	4	12	4	4	4	8	0	16	0	12	12	8	8	4	4	20	4	24	4	0	4	4	12	0
4.5		0	12	4	0	0	16	8	16	8	10	16	4	8	8	8	12	20	12	8	0	16	8	4	24	4	20	4	4	8	16	4	24	4	12	8	4	4	4	0	16	4	20	16	0	4	4	8	8
4.525		4	8	0	8	8	28	12	12	4	13.3333	12	8	8	4	16	0	8	8	8	4	16	8	4	24	0	16	8	0	8	16	8	28	4	12	12	0	12	4	8	20	4	16	12	4	8	4	12	8
4.55		4	4	4	12	8	24	4	20	8	16.6667	16	4	16	8	20	8	12	8	8	8	16	8	8	20	4	8	12	4	8	4	8	16	4	16	20	0	8	4	8	24	0	16	0	12	8	4	8	8
4.575		4	4	12	8	8	12	8	16	12	10	8	0	16	8	16	12	20	4	8	8	8	0	8	20	4	8	8	4	16	8	8	16	12	12	16	0	0	0	0	20	8	8	12	8	4	8	8	8
4.6		8	4	12	8	12	8	8	12	16	10	12	0	4	4	20	4	20	0	16	4	4	0	4	16	0	16	0	0	12	12	12	20	8	12	12	0	12	4	4	24	8	8	12	4	8	12	12	4
4.625		4	8	12	16	4	20	8	16	16	10	12	0	0	8	24	0	16	0	8	4	8	0	4	16	0	12	8	4	8	8	12	16	4	24	20	4	16	8	4	24	0	12	0	4	4	4	8	12
4.65		4	8	16	20	4	24	8	16	12	16.6667	16	8	8	4	20	0	12	4	8	8	8	0	8	20	0	8	16	4	8	12	12	12	12	20	24	4	4	8	0	20	0	12	8	8	8	0	4	8
4.675		4	16	16	8	8	8	8	20	12	13.3333	16	8	8	12	12	0	20	12	8	4	12	0	8	12	0	20	8	0	0	8	8	16	8	8	24	0	8	4	4	20	0	20	8	8	16	4	8	4
4.7		0	16	12	12	4	12	16	12	16	10	8	8	0	12	12	0	16	16	4	0	12	0	12	20	0	24	8	4	8	8	4	24	8	4	12	0	16	4	4	24	4	20	8	12	16	4	8	12
4.725		0	12	12	12	0	16	8	8	12	10	4	8	0	4	20	0	8	12	8	0	8	4	12	36	4	12	16	4	16	16	8	16	12	4	16	4	16	8	4	24	8	12	8	12	8	4	4	8
4.75		4	20	8	8	4	16	0	12	8	10	0	8	4	4	20	0	12	8	8	4	16	4	4	24	8	12	12	0	12	16	4	8	4	4	20	4	12	4	4	32	8	12	4	4	8	12	4	8
4.775		4	12	8	8	4	20	4	4	16	13.3333	16	12	12	8	16	0	12	16	4	8	12	0	4	12	4	8	8	0	16	8	8	16	0	8	4	0	4	4	4	28	8	20	4	8	12	16	0	8
4.8		0	8	12	0	8	16	4	4	20	10	20	16	8	8	16	0	8	24	4	8	12	8	4	24	4	0	16	4	12	4	8	16	4	20	8	4	8	4	4	20	8	24	8	8	4	12	0	4
4.825		0	12	8	0	8	20	8	8	12	6.66667	8	16	0	8	16	4	16	16	12	8	20	12	0	24	8	4	16	4	0	12	0	8	8	12	16	8	12	0	0	24	8	20	12	12	12	12	4	8
4.85		0	16	4	0	12	16	8	4	24	10	4	8	0	8	20	4	16	12	8	8	12	12	4	20	4	16	4	0	8	20	4	12	4	8	16	4	8	8	4	28	4	12	12	8	16	20	4	8
4.875		0	12	8	0	16	16	0	0	28	16.6667	0	4	4	4	16	0	12	16	0	12	12	8	4	20	0	16	4	4	20	16	12	24	4	16	12	0	8	8	4	20	0	8	12	4	12	16	0	8
4.9		0	16	12	0	8	24	0	8	12	10	4	8	4	8	16	0	8	12	4	12	16	0	4	24	4	12	8	4	16	8	8	20	12	8	8	0	12	0	4	16	4	12	4	12	12	4	4	12
4.925		4	16	16	4	4	28	0	12	4	10	12	8	0	12	20	0	0	16	8	4	20	4	12	28	4	12	16	0	8	12	0	8	8	4	8	4	12	4	8	28	8	24	8	8	8	8	8	12
4.95		8	12	16	4	4	28	0	20	12	16.6667	16	4	8	8	16	4	4	16	4	4	12	4	20	28	0	8	16	4	12	12	0	12	4	8	8	8	4	4	4	20	8	24	12	4	8	8	8	8
4.975		4	16	4	0	4	28	4	28	12	16.6667	16	8	8	4	16	4	8	8	8	4	12	0	16	20	4	8	12	4	12	8	4	20	4	8	4	4	8	4	0	16	8	12	4	8	8	4	4	4
5		0	12	4	4	0	16	4	12	12	10	12	4	4	8	20	0	4	12	12	0	12	4	8	16	4	12	12	4	8	4	4	20	0	8	8	0	8	8	4	20	12	8	0	4	4	8	0	4
5.025		8	20	8	8	0	16	4	8	16	6.66667	12	16	4	8	24	0	4	20	4	12	12	4	4	28	0	8	4	8	4	4	4	28	4	8	12	0	0	8	4	28	8	16	8	4	4	12	8	4
5.05		12	16	8	4	4	28	4	8	12	6.66667	16	20	0	4	20	0	4	16	0	12	12	4	8	24	12	8	4	4	0	4	4	24	4	12	8	8	8	4	0	32	0	20	8	8	8	12	12	8
5.075		8	12	8	4	4	24	0	8	12	10	16	8	4	4	28	4	8	8	8	0	16	8	8	28	12	16	8	8	4	4	0	20	0	12	12	8	8	4	0	16	4	12	4	4	16	12	4	12
5.1		4	12	8	4	4	20	0	12	20	13.3333	16	12	4	8	24	8	8	4	16	4	20	4	4	36	4	16	8	8	8	8	0	16	4	16	12	0	0	4	0	12	8	12	16	0	12	8	0	8
5.125		4	8	4	4	12	20	8	8	16	16.6667	16	16	0	8	4	12	4	8	8	8	16	0	4	24	8	16	4	4	12	8	0	8	4	16	8	0	4	0	0	16	4	12	20	0	4	8	0	4
5.15		12	16	8	4	8	8	8	4	8	13.3333	20	12	4	4	8	8	12	16	4	8	24	0	4	12	12	12	4	4	8	4	4	12	0	12	12	4	8	4	0	4	8	12	8	12	12	4	4	0
5.175		8	20	16	0	4	16	8	8	16	6.66667	16	4	4	4	24	0	12	8	8	4	12	4	4	12	12	16	8	12	4	4	4	12	0	24	16	8	8	4	4	4	12	20	12	12	16	4	8	0
5.2		0	12	8	4	4	28	12	12	20	10	4	4	0	12	24	0	12	8	12	0	4	8	0	16	4	12	12	16	8	4	4	12	4	20	12	4	4	8	8	16	8	20	20	0	8	16	4	0
5.225		4	8	8	4	0	16	4	4	12	10	12	20	4	12	20	8	12	8	8	4	8	12	4	16	4	0	12	4	12	12	4	20	4	12	8	4	4	8	4	20	4	24	12	8	4	12	0	0
5.25		4	8	12	4	0	16	4	4	16	6.66667	20	16	4	8	32	8	16	8	8	12	8	8	12	16	4	4	12	4	16	16	0	20	0	24	12	8	8	8	4	16	4	20	12	8	8	8	4	4
5.275		0	12	8	8	4	16	8	4	20	6.66667	12	4	4	4	24	0	12	8	16	8	12	0	12	16	0	12	8	12	12	8	0	20	0	16	16	12	4	8	12	12	4	12	12	4	8	12	12	8
5.3		4	12	8	4	8	20	4	4	20	6.66667	8	8	8	0	20	8	4	8	16	4	8	8	8	20	4	8	0	16	4	8	0	20	8	4	24	8	0	4	12	20	0	16	8	12	8	12	12	4
5.325		12	4	4	8	8	32	4	12	20	6.66667	8	8	4	4	28	12	12	8	8	4	4	8	4	16	8	8	8	8	4	4	0	16	16	12	16	8	4	8	4	28	4	12	8	8	4	12	8	12
5.35		8	8	4	16	8	24	4	12	8	3.33333	4	4	8	4	20	8	12	4	0	4	12	4	4	12	4	12	16	0	12	4	4	16	8	8	4	8	4	8	4	16	16	12	4	8	20	12	8	12
5.375		0	16	8	12	8	8	0	8	12	10	0	8	16	0	20	8	8	8	8	8	12	12	4	20	0	8	12	4	12	12	8	16	8	8	8	4	4	12	8	12	12	8	4	8	28	12	12	0
5.4		4	16	4	4	4	16	0	12	16	10	4	16	12	12	28	8	16	8	16	8	8	8	0	20	0	8	4	4	12	8	12	20	8	20	12	16	4	8	12	16	4	4	8	4	12	12	12	0
5.425		8	20	8	4	8	20	4	8	20	6.66667	12	16	8	16	16	4	20	8	16	4	12	0	4	12	0	12	8	12	16	0	8	24	0	16	12	12	0	4	8	20	8	12	4	4	8	12	8	0
5.45		8	16	8	4	8	16	4	4	20	10	20	20	8	4	8	0	12	8	8	0	16	4	12	16	4	16	16	12	12	8	4	16	12	8	12	0	4	8	4	20	4	16	8	0	12	12	4	8
5.475		8	12	4	0	4	20	0	12	12	10	16	12	4	4	20	0	8	8	4	0	12	4	8	24	4	16	12	0	4	16	4	20	12	4	12	4	4	8	4	20	0	8	12	0	16	16	0	8
5.5		12	12	8	0	4	12	0	16	16	6.66667	12	8	0	8	24	0	8	4	8	4	12	4	0	16	8	16	8	0	8	12	0	24	12	0	4	8	8	8	12	20	0	8	12	4	16	16	0	0
5.525		8	4	8	0	4	16	0	12	12	6.66667	8	12	4	4	20	8	12	8	8	8	16	8	8	16	8	20	8	0	12	4	4	20	12	8	0	12	12	4	16	24	8	16	8	8	8	12	4	0
5.55		8	8	12	0	8	24	4	8	16	6.66667	0	4	8	0	12	8	12	12	8	8	12	4	12	32	4	20	4	4	4	8	12	28	4	12	0	16	4	4	12	28	8	8	12	8	4	12	8	0
5.575		8	16	16	0	4	20	4	16	12	10	12	4	12	0	16	4	12	12	4	4	8	0	4	24	8	8	0	12	8	12	12	20	12	8	8	8	4	12	12	16	0	8	12	8	8	20	4	4
5.6		8	8	16	0	8	12	0	20	12	16.6667	12	8	8	0	12	8	16	16	0	0	8	0	4	16	8	0	8	12	12	8	16	16	12	16	16	12	8	8	12	24	4	16	0	4	4	20	8	8
5.625		12	8	16	0	12	12	0	8	16	10	0	4	8	4	12	12	16	8	8	4	16	0	8	20	4	12	16	4	4	8	20	20	4	20	12	12	4	8	12	24	8	8	0	0	0	12	8	4
5.65		8	20	12	0	8	16	0	8	8	6.66667	8	8	12	12	24	8	12	4	8	4	12	0	4	12	4	16	8	0	4	4	12	12	8	16	16	0	4	12	8	12	12	0	8	4	0	8	12	4
5.675		12	12	16	0	4	24	8	12	8	10	12	16	4	16	12	4	8	8	4	0	4	0	0	16	4	8	4	8	8	8	8	12	8	24	16	4	8	8	16	12	12	12	12	8	4	8	12	12
5.7		8	4	12	0	4	24	8	12	16	10	12	16	4	8	12	4	8	4	16	0	12	4	0	24	8	12	8	8	4	8	4	16	4	16	4	4	12	8	16	20	8	24	8	8	4	8	8	12
5.725		0	8	8	0	16	16	4	8	16	10	16	8	4	8	12	4	4	4	16	4	8	4	0	20	8	12	12	8	0	4	4	16	8	4	4	8	16	8	8	24	8	16	16	4	4	16	8	8
5.75		4	8	12	4	12	16	8	0	20	10	16	0	0	12	12	8	4	16	4	4	4	4	4	20	0	20	12	12	4	4	8	16	8	8	8	8	20	8	8	16	8	16	20	8	8	12	4	8
5.775		4	4	4	4	4	24	8	4	24	10	8	4	4	8	24	4	8	16	0	8	4	4	4	24	0	24	4	4	12	0	4	24	0	16	4	0	16	4	16	12	4	12	16	16	4	4	8	4
5.8		8	4	4	0	4	24	4	8	12	13.3333	8	4	4	8	16	4	12	8	12	8	4	0	4	16	4	20	8	4	12	0	4	32	0	16	0	8	4	0	16	12	0	0	12	8	0	8	8	4
5.825		16	4	12	0	4	12	4	12	8	16.6667	16	0	4	8	20	8	20	12	12	0	8	0	8	16	4	16	12	8	12	0	4	24	4	20	4	8	8	4	4	28	0	4	8	0	8	12	8	12
5.85		8	0	8	0	4	8	4	12	12	13.3333	20	0	8	4	20	8	16	8	8	0	8	4	8	20	0	8	8	16	16	0	4	16	4	20	4	8	12	4	0	20	4	16	8	0	8	12	8	12
5.875		0	8	0	0	8	12	0	8	12	6.66667	16	0	4	4	8	4	8	12	12	4	8	4	8	16	0	20	16	12	8	0	8	20	8	16	4	12	4	8	8	12	8	24	8	8	4	4	8	4
5.9		4	12	0	8	8	16	4	16	12	10	4	4	4	16	12	0	12	16	12	4	8	4	8	16	0	20	20	8	4	0	4	24	8	16	8	4	0	12	12	20	12	16	8	12	8	8	8	0
5.925		8	8	8	8	0	12	16	12	12	13.3333	4	4	4	12	16	0	12	16	12	4	8	4	8	16	0	16	16	4	20	0	8	24	0	12	4	0	4	4	8	8	8	8	12	4	8	12	8	4
5.95		4	12	8	4	4	8	12	0	12	10	12	4	8	0	24	4	16	12	4	4	4	4	8	20	4	12	12	0	16	8	12	28	4	16	4	8	8	0	4	4	4	8	8	4	12	4	12	4
5.975		4	20	8	4	8	28	4	12	16	13.3333	20	8	8	0	28	8	12	4	4	4	0	4	4	24	4	4	4	16	4	8	8	16	8	12	8	8	12	0	0	8	8	16	0	4	12	8	8	0
6		16	20	16	0	4	32	4	12	12	13.3333	12	8	0	8	20	4	4	8	8	4	4	0	8	24	0	4	4	20	16	0	4	16	4	8	12	0	16	8	8	8	4	16	0	4	16	8	4	4
6.025		24	16	12	0	0	20	0	0	12	6.66667	4	12	4	16	20	0	4	16	8	4	8	0	8	24	4	4	8	8	16	0	4	28	8	12	12	4	12	12	12	8	4	12	4	12	20	16	8	4
6.05	odor on	16	12	4	0	0	16	8	4	16	6.66667	8	8	8	12	24	0	4	16	4	4	8	4	4	28	4	8	4	12	8	0	8	28	8	16	4	4	8	4	4	16	8	16	8	12	16	20	12	4
6.075	odor on	4	12	4	4	0	20	8	12	24	3.33333	8	12	12	4	16	0	4	4	4	8	12	4	4	20	0	12	0	12	12	4	8	24	4	12	4	0	8	0	12	24	8	8	4	12	20	4	16	8
6.1	odor on	8	8	12	4	0	24	8	12	20	6.66667	8	12	12	0	12	0	4	8	8	8	16	4	4	20	4	16	4	4	8	8	12	16	12	12	4	0	4	0	16	28	4	4	0	12	16	8	8	8
6.125	odor on	8	4	8	4	4	12	12	16	8	10	8	8	12	8	24	4	16	12	8	4	12	12	4	28	4	16	12	4	8	4	12	16	8	8	4	4	4	0	8	16	0	8	4	12	8	20	8	8
6.15	odor on	12	8	16	4	4	12	8	20	24	6.66667	16	12	12	12	28	8	24	12	12	8	8	8	4	20	4	16	16	8	12	8	4	16	8	0	4	4	12	4	8	8	0	4	8	16	20	28	20	4
6.175	odor on	16	16	16	0	0	16	4	16	20	13.3333	16	16	8	16	20	8	20	20	16	8	24	4	4	16	4	16	8	16	16	12	4	20	20	8	0	16	12	8	8	12	4	4	12	24	24	32	28	12
6.2	odor on	4	20	4	8	4	12	0	8	12	10	16	12	12	12	12	16	20	20	16	8	28	8	0	28	8	12	8	12	24	4	8	20	16	16	4	20	20	12	8	8	12	16	12	24	20	44	36	12
6.225	odor on	4	16	12	16	4	8	0	4	20	6.66667	20	0	8	12	24	16	12	20	8	4	12	16	0	32	12	12	20	8	20	0	8	20	8	12	8	16	20	12	4	12	8	16	8	28	16	52	36	4
6.25	odor on	12	16	8	8	8	16	4	12	12	13.3333	12	4	4	20	28	8	8	24	12	4	12	12	4	20	16	16	20	8	16	4	12	28	4	8	4	12	12	8	4	16	0	16	8	44	16	44	40	20
6.275	odor on	20	16	0	8	8	16	4	20	8	13.3333	12	8	12	16	24	4	12	16	16	8	12	12	8	20	20	16	16	0	16	8	12	24	4	16	4	4	16	16	12	16	8	20	12	32	28	36	40	28
6.3	odor on	20	16	8	16	0	20	4	16	4	10	24	8	8	8	28	8	20	12	8	12	8	12	16	20	12	8	20	12	12	4	8	20	4	24	16	8	20	16	16	28	12	12	12	32	28	36	40	24
6.325	odor on	16	20	12	12	4	28	8	12	8	10	24	4	0	4	20	8	24	16	4	12	8	8	20	24	8	12	24	16	4	4	8	20	4	24	20	8	16	16	24	20	8	8	16	32	24	40	48	32
6.35	odor on	16	24	12	8	4	32	12	12	16	10	16	4	4	8	24	8	20	16	8	12	12	8	12	36	12	16	20	4	8	4	12	24	4	24	12	8	16	20	16	4	8	8	12	20	28	40	44	36
6.375	odor on	16	12	16	12	0	24	12	12	20	10	16	8	20	12	28	12	12	20	16	16	8	0	4	24	8	12	12	4	12	4	8	24	8	20	8	12	24	12	20	12	12	8	12	28	32	44	40	40
6.4	odor on	20	12	12	16	0	16	4	16	20	13.3333	16	8	16	16	16	12	20	24	12	12	12	4	8	24	8	16	12	8	8	12	8	16	16	8	16	16	16	16	28	16	16	12	20	32	36	44	36	40
6.425	odor on	20	16	8	20	4	24	4	8	20	20	16	8	4	12	16	20	20	24	12	12	16	4	8	24	16	16	20	8	16	12	12	20	8	8	20	12	16	20	24	24	8	16	12	20	28	40	40	36
6.45	odor on	12	12	16	12	8	16	4	4	20	13.3333	20	4	8	12	20	12	20	24	16	12	12	12	0	8	16	16	24	8	20	8	12	24	0	16	8	8	16	24	20	24	8	12	20	24	24	40	44	32
6.475	odor on	8	24	12	0	4	24	4	12	16	6.66667	20	8	8	12	16	12	24	20	8	16	16	20	12	20	12	16	20	8	24	12	8	16	4	16	4	8	16	28	8	16	8	24	20	36	20	40	44	24
6.5	odor on	12	20	8	8	4	28	8	12	20	13.3333	12	12	4	4	16	12	16	16	8	12	12	12	12	24	8	12	16	8	24	8	4	20	4	16	12	4	20	20	16	16	12	32	12	28	24	36	36	28
6.525	odor on	8	8	12	20	8	16	8	12	20	13.3333	12	4	8	4	20	8	12	8	12	8	12	12	4	16	8	24	16	8	8	4	12	20	4	12	20	16	16	24	28	16	16	24	16	20	40	44	32	32
6.55		0	4	8	12	8	8	12	12	20	16.6667	16	4	12	4	20	16	16	0	12	12	12	20	0	16	8	24	12	8	12	4	8	20	20	16	20	16	24	24	20	20	8	12	20	24	20	40	44	36
6.575		4	12	4	8	8	12	12	12	32	10	12	8	4	4	16	8	20	8	12	4	8	16	4	16	8	8	8	4	20	0	4	28	16	20	16	0	16	16	16	16	8	12	24	24	16	32	40	40
6.6		4	16	0	12	4	24	8	20	32	3.33333	8	12	4	8	12	4	16	12	4	0	16	8	8	16	4	8	12	0	8	0	16	24	4	20	12	4	12	16	16	24	8	20	28	24	32	40	36	28
6.625		4	8	8	4	4	24	12	16	28	10	4	16	8	8	24	8	12	8	4	4	16	12	8	24	4	8	16	4	4	4	12	16	12	20	16	16	20	12	20	24	8	12	20	20	28	32	36	28
6.65		12	24	12	4	4	12	12	16	24	10	4	12	8	4	32	8	4	20	4	8	12	12	4	20	4	12	16	4	12	8	4	16	12	16	24	12	20	12	24	12	12	8	12	12	24	28	28	28
6.675		8	28	4	4	0	12	8	16	20	13.3333	12	8	12	0	20	8	0	20	4	12	8	8	0	16	0	24	8	0	8	4	4	20	4	12	12	0	16	12	16	8	16	12	20	12	24	32	28	24
6.7		0	12	4	0	4	16	8	8	24	13.3333	8	8	8	4	8	12	0	8	8	8	8	8	0	24	0	24	4	0	0	0	4	12	0	12	8	0	12	8	20	8	12	12	20	8	20	28	28	28
6.725		4	20	16	8	8	16	12	8	16	10	0	16	0	8	16	8	4	4	12	12	8	12	0	12	4	8	8	8	8	0	8	16	8	20	16	0	16	8	20	12	4	16	16	8	16	20	24	20
6.75		8	24	12	8	12	20	16	4	8	10	4	12	0	8	24	4	8	8	16	16	16	16	0	16	8	12	12	12	16	4	4	24	8	20	12	0	16	8	8	16	4	16	12	0	16	12	28	20
6.775		4	12	8	0	8	20	8	16	8	10	12	0	8	4	24	8	20	12	16	8	16	8	0	24	4	20	8	4	12	16	16	20	8	12	4	0	12	4	12	20	4	12	12	0	20	8	24	24
6.8		4	8	8	0	0	12	0	24	12	16.6667	16	8	8	4	24	8	20	8	12	8	0	8	4	20	0	8	4	4	8	12	20	20	8	20	4	8	12	8	16	16	4	8	8	0	20	20	20	24
6.825		8	8	0	16	0	16	8	12	16	13.3333	20	16	8	8	12	4	12	4	12	8	4	8	4	24	0	4	12	8	8	4	12	28	0	20	8	8	12	8	12	20	8	8	8	0	8	24	12	24
6.85		4	16	0	20	0	24	8	8	12	10	20	16	8	4	16	0	20	4	12	4	8	4	8	28	4	16	12	4	16	4	12	36	0	8	8	4	8	8	20	32	8	12	12	0	8	12	12	20
6.875		0	12	4	12	0	16	4	16	8	6.66667	20	28	8	0	24	0	16	8	4	0	4	4	12	24	4	16	8	4	24	4	4	24	4	8	8	4	8	8	20	24	4	12	12	0	16	16	20	12
6.9		0	4	8	12	0	20	12	16	20	6.66667	16	20	12	8	16	0	16	8	8	0	8	8	4	24	4	12	8	4	16	8	8	24	4	12	8	12	4	4	12	16	0	12	8	0	12	20	20	12
6.925		0	8	8	4	0	28	12	8	20	13.3333	16	8	4	12	20	0	16	4	12	4	16	8	4	28	8	12	8	0	4	8	12	28	4	12	8	12	4	12	8	16	8	8	8	0	8	12	16	20
6.95		0	12	12	4	4	16	4	8	16	10	8	8	4	12	24	0	20	4	12	4	8	4	8	20	4	8	8	4	0	4	8	16	4	16	8	8	4	8	8	12	8	16	12	0	12	8	12	20
6.975		0	16	12	4	8	12	8	4	16	13.3333	12	4	4	16	28	4	16	4	20	4	4	12	4	16	0	12	8	4	4	0	8	28	4	20	8	8	4	4	12	16	4	16	12	0	8	8	12	12
7		0	12	16	0	4	20	8	8	12	16.6667	12	12	4	12	16	4	8	4	16	4	12	12	0	4	4	12	12	4	12	8	8	28	4	16	8	8	8	4	12	12	8	0	12	0	4	12	8	12
7.025		0	4	16	8	0	16	0	8	12	13.3333	0	16	12	8	16	0	16	8	4	0	12	4	4	8	12	12	16	12	12	8	8	16	4	16	8	4	8	0	12	16	16	12	8	0	12	12	4	16
7.05		0	8	4	12	4	12	4	8	8	6.66667	12	12	12	4	28	0	8	8	4	4	12	4	8	16	12	8	12	12	8	0	4	20	4	8	4	0	12	4	12	24	16	16	8	0	8	8	12	24
7.075		0	12	8	8	4	16	8	12	4	6.66667	20	12	12	0	20	0	8	8	8	4	16	8	8	16	4	4	12	12	12	4	4	28	4	12	4	8	12	12	20	20	8	8	16	4	4	4	20	16
7.1		4	12	12	12	8	24	12	16	0	10	12	12	12	4	12	0	12	12	16	4	8	8	8	8	8	16	24	12	8	4	4	24	4	20	4	8	4	8	12	24	4	8	12	8	4	8	16	4
7.125		8	12	8	12	8	24	8	20	8	6.66667	8	12	4	4	20	4	12	20	12	4	12	0	4	8	8	24	16	8	0	8	0	20	4	8	8	0	4	4	0	20	4	8	8	4	4	16	12	16
7.15		4	8	12	8	0	20	0	12	8	10	12	4	12	4	20	4	12	24	4	0	16	4	0	16	0	12	8	4	4	12	0	16	4	8	8	4	8	8	4	20	4	4	8	0	12	16	4	12
7.175		0	8	8	4	4	20	0	16	0	13.3333	12	0	12	4	12	4	4	16	16	0	8	4	0	24	0	4	8	0	8	4	0	16	8	16	8	8	12	8	8	24	4	4	0	0	12	8	4	4
7.2		0	8	8	4	8	24	0	16	4	10	4	4	8	16	20	4	4	16	24	0	12	4	0	24	4	12	8	4	12	0	4	28	8	8	8	8	8	8	4	8	4	12	8	4	8	8	8	8
7.225		0	8	16	4	4	28	0	16	8	13.3333	8	8	12	16	20	4	12	12	12	0	16	12	4	20	8	12	8	4	8	0	4	24	4	0	8	4	8	4	0	12	0	12	8	4	8	16	8	12
7.25		0	4	8	0	4	16	12	20	8	13.3333	8	4	8	8	12	8	12	20	8	12	12	12	12	20	4	20	4	8	4	4	4	20	8	0	8	4	12	4	4	20	4	16	4	4	8	8	4	16
7.275		4	12	0	0	4	12	16	20	8	6.66667	12	12	8	12	20	12	12	16	8	12	16	12	8	16	4	20	8	16	12	12	8	20	8	8	8	0	12	12	8	20	8	20	8	4	4	4	8	8
7.3		4	12	0	4	4	20	8	8	8	6.66667	16	16	8	4	24	4	20	4	4	4	16	12	0	16	8	8	12	8	8	8	12	28	8	12	12	0	12	8	8	20	4	8	12	0	8	8	12	4
7.325		0	12	0	4	4	28	12	8	16	6.66667	12	16	8	0	20	4	16	16	0	4	16	12	4	24	8	20	8	0	4	8	8	20	4	8	4	8	12	4	4	12	0	12	12	4	8	4	12	8
7.35		4	16	8	0	0	16	8	20	16	6.66667	12	20	12	4	20	4	12	28	12	0	20	8	12	24	8	20	8	4	4	20	8	4	4	16	4	8	8	8	0	16	8	16	8	4	0	0	8	4
7.375		4	8	12	4	8	12	0	16	16	6.66667	12	12	12	8	12	0	20	20	16	0	24	4	16	16	4	12	12	16	8	12	12	12	4	16	12	4	8	4	12	20	12	12	8	4	0	0	0	12
7.4		8	12	12	4	12	24	0	12	20	6.66667	16	12	4	4	16	4	16	12	4	4	20	4	8	24	0	12	4	16	12	0	12	12	4	12	8	8	16	0	12	16	4	8	4	4	4	8	4	16
7.425		8	12	8	0	4	24	16	16	16	10	20	20	12	0	20	8	8	20	12	4	4	4	0	20	4	8	4	4	12	8	8	24	4	16	0	8	12	4	8	16	4	8	4	0	8	8	4	4
7.45		4	8	16	4	0	24	20	16	16	10	12	12	16	4	12	4	8	16	16	0	0	8	4	16	8	8	8	0	16	8	4	24	8	12	4	4	8	4	12	20	4	16	4	4	4	8	0	16
7.475		4	12	16	12	0	16	4	12	16	10	0	8	8	4	16	0	12	12	4	12	8	4	8	20	8	12	8	4	12	4	8	20	8	4	12	0	16	4	16	20	0	12	12	4	4	12	4	16
7.5		4	20	8	8	8	16	4	8	16	10	4	12	12	4	20	0	12	12	0	12	16	4	8	16	4	16	12	4	12	8	12	20	0	0	16	0	20	4	12	24	4	4	12	8	4	8	16	4
7.525		4	12	8	4	8	16	8	12	12	3.33333	12	4	8	4	20	4	4	4	4	0	8	8	8	24	0	20	16	8	12	8	8	16	8	16	12	4	20	4	8	20	4	0	4	8	0	4	12	12
7.55		4	12	8	4	0	16	8	8	12	13.3333	16	12	0	4	24	4	4	12	4	4	4	4	4	24	0	20	12	12	4	8	0	28	8	24	4	4	20	4	12	12	0	8	4	0	0	8	0	8
7.575		12	20	4	8	0	20	16	0	16	20	12	20	8	4	24	4	8	16	8	4	8	4	8	12	4	16	8	4	8	4	12	28	8	16	0	4	16	0	12	16	0	8	8	0	4	8	0	4
7.6		8	12	0	8	4	12	20	4	12	13.3333	12	8	12	0	16	4	8	12	8	4	4	4	12	20	4	12	8	4	8	0	12	12	8	16	0	4	16	0	8	16	0	8	12	0	4	8	4	8
7.625		0	8	4	8	8	8	8	16	8	6.66667	12	4	4	8	20	0	8	20	8	4	12	8	8	20	0	20	4	4	8	0	0	16	4	20	0	0	16	8	4	12	4	20	16	4	12	8	4	4
7.65		0	4	16	8	4	12	4	20	12	3.33333	12	20	4	12	20	4	4	24	16	0	16	12	4	12	4	16	4	0	8	0	8	20	4	12	4	0	16	8	8	12	8	16	16	8	16	12	4	4
7.675		0	12	20	0	0	24	8	16	8	13.3333	12	20	4	12	16	4	8	16	12	0	8	8	4	20	8	8	16	0	0	0	8	20	4	0	12	0	16	4	4	20	4	4	4	8	12	12	4	8
7.7		0	12	8	0	8	24	8	16	4	13.3333	8	12	4	12	12	0	8	12	8	0	20	8	8	20	8	16	20	0	12	4	0	20	4	12	8	12	16	4	4	24	4	8	4	8	12	4	0	12
7.725		8	4	4	0	12	16	8	16	8	6.66667	8	16	4	8	12	4	4	12	8	4	16	8	8	28	8	16	12	4	20	4	0	12	4	20	0	12	12	0	8	20	8	16	4	4	8	8	8	12
7.75		8	8	12	4	12	20	8	16	8	6.66667	16	20	4	8	24	4	4	12	8	4	16	8	8	32	16	12	4	8	12	4	8	16	8	12	8	4	8	8	8	24	4	12	0	8	8	16	12	8
7.775		4	12	12	8	8	16	12	16	8	6.66667	20	20	8	4	20	0	8	12	8	4	20	16	4	20	12	16	8	4	8	8	8	16	4	4	8	4	8	8	8	28	0	8	4	8	8	12	8	4
7.8		4	16	4	4	4	20	8	12	12	6.66667	12	20	8	4	20	0	8	12	8	4	12	16	8	16	4	8	12	4	8	8	4	16	4	8	8	0	12	0	4	16	4	12	4	4	8	4	4	4
7.825		4	8	4	4	8	16	0	12	16	6.66667	8	16	8	4	12	0	4	16	4	4	24	8	8	16	4	12	8	4	12	8	4	16	12	8	8	4	16	4	4	20	4	8	0	8	4	4	8	8
7.85		8	16	8	4	4	8	0	12	8	6.66667	12	4	4	4	16	0	4	8	8	4	20	4	0	16	0	16	12	4	16	8	4	24	8	4	0	8	12	8	20	28	0	8	4	4	4	0	8	4
7.875		4	16	8	12	0	16	4	4	8	13.3333	12	8	4	4	24	4	4	8	8	8	8	8	0	12	0	8	12	4	12	8	4	20	0	8	12	8	16	4	16	16	0	12	12	8	4	0	4	4
7.9		0	8	12	16	4	24	4	8	8	13.3333	4	12	4	0	12	4	8	8	8	12	8	12	8	12	0	4	16	0	4	4	0	8	4	8	12	8	12	8	0	12	4	8	8	12	8	8	4	8
7.925		0	20	12	8	8	24	0	16	4	6.66667	12	8	4	4	16	0	12	12	12	8	8	4	12	24	0	12	20	4	4	0	0	24	4	4	4	8	4	8	4	16	4	8	8	4	8	8	4	12
7.95		0	20	20	12	8	20	4	8	12	10	20	8	8	4	32	0	12	24	4	0	28	8	12	20	0	16	20	4	12	0	0	24	0	12	16	8	4	4	8	20	8	8	8	0	4	0	4	12
7.975		4	16	20	8	8	20	4	12	12	10	12	16	12	4	32	0	8	24	8	4	24	8	8	12	8	4	12	4	20	0	8	16	0	16	16	8	16	8	4	16	12	20	4	0	8	4	0	8
8		4	12	4	0	8	16	0	16	4	3.33333	12	16	16	4	24	0	8	28	12	12	20	4	0	16	12	8	4	8	16	8	8	12	4	8	12	8	16	4	0	12	8	24	8	0	20	4	0	4
8.025		0	8	4	4	8	8	0	4	0	3.33333	8	12	8	0	16	0	4	20	12	8	16	8	0	28	4	12	8	8	8	8	12	8	4	4	12	8	0	4	8	20	8	12	8	12	12	4	0	4
8.05		0	12	8	4	4	8	4	0	8	6.66667	8	12	8	0	12	0	4	8	12	4	16	8	0	28	0	8	20	4	8	0	16	12	0	4	16	4	4	8	12	20	12	20	8	12	4	8	4	4
8.075		4	16	12	4	4	12	4	8	16	10	8	4	8	8	16	8	4	12	12	4	16	8	0	12	4	4	20	0	20	4	8	20	8	8	12	0	4	8	8	24	8	20	12	0	12	4	4	8
8.1		4	16	8	4	8	12	0	12	20	6.66667	12	0	8	12	16	8	8	12	8	0	0	8	8	16	8	4	16	0	16	8	8	24	8	8	4	4	0	8	8	24	4	20	8	0	12	4	0	8
8.125		4	8	4	0	8	12	4	12	16	6.66667	20	16	8	4	12	0	8	4	12	0	16	8	8	20	4	12	12	0	4	8	4	20	4	12	12	8	8	12	4	16	4	28	0	0	4	4	4	0
8.15		4	4	8	4	4	20	4	12	4	10	12	28	8	0	12	0	16	0	12	0	16	12	0	12	4	16	4	8	4	8	4	24	12	12	20	8	8	8	8	20	0	16	12	4	0	0	4	0
8.175		0	12	4	4	0	20	4	8	4	10	8	16	8	4	12	0	16	12	0	0	4	12	4	16	8	16	12	12	4	4	8	16	12	8	20	8	4	4	16	28	0	20	12	4	0	8	0	4
8.2		4	8	4	4	4	12	8	4	8	10	20	8	0	8	12	0	12	20	12	4	16	12	4	24	4	12	8	4	20	8	8	16	12	12	12	12	12	4	16	28	4	24	12	4	8	12	4	8
8.225		4	8	4	4	8	20	4	4	12	3.33333	20	8	4	4	12	4	8	12	12	16	16	12	4	12	4	8	20	0	20	8	4	28	8	12	4	12	8	0	12	16	8	20	16	4	12	12	8	4
8.25		0	16	4	4	4	24	0	12	16	6.66667	12	8	8	0	16	4	4	8	0	12	8	8	4	12	4	16	20	4	16	0	4	28	4	8	8	4	4	0	4	8	4	16	4	0	8	8	8	8
8.275		4	8	4	4	8	20	4	12	20	6.66667	16	8	12	0	24	0	20	12	8	0	16	8	4	16	4	16	8	8	16	12	4	24	4	16	12	4	4	8	12	12	0	8	0	4	8	0	4	8
8.3		4	0	0	0	12	20	4	8	20	6.66667	16	8	8	0	24	0	20	16	8	0	20	8	4	12	4	12	8	4	8	16	0	24	0	16	8	12	0	20	12	16	4	12	8	4	8	0	8	8
8.325		0	4	12	0	8	16	0	12	16	13.3333	8	12	0	4	20	4	12	16	4	0	12	4	4	16	8	12	12	4	8	4	0	20	0	4	8	8	8	20	8	12	8	12	8	0	16	0	16	12
8.35		0	20	12	0	8	8	0	8	16	10	16	8	4	12	12	4	20	20	4	8	24	0	4	24	12	24	20	0	4	8	4	12	4	4	16	0	12	8	8	12	4	8	8	8	16	8	8	8
8.375		0	24	0	0	8	16	0	4	16	6.66667	20	12	8	8	16	0	20	12	4	12	20	12	0	32	8	20	8	4	8	12	12	16	4	4	12	0	8	8	8	16	0	8	8	8	4	12	4	8
8.4		0	12	0	0	8	24	4	12	16	10	12	16	4	0	20	8	16	4	8	16	4	12	0	20	4	8	8	4	16	4	16	20	4	8	0	4	8	8	8	16	0	8	4	4	4	4	4	8
8.425		0	8	4	0	4	28	4	20	12	13.3333	8	12	0	0	16	8	8	20	4	16	16	12	0	8	0	8	12	0	12	0	8	12	12	12	0	4	8	8	4	16	4	8	8	12	16	4	8	4
8.45		4	16	4	0	0	24	0	16	12	10	16	12	4	0	20	4	0	16	0	4	16	16	0	16	0	12	12	4	8	8	0	16	8	20	4	0	8	8	12	12	4	12	8	8	16	8	12	4
8.475		8	20	4	0	0	20	0	16	8	10	20	4	4	0	16	4	8	12	12	12	16	12	4	20	0	8	12	4	12	12	0	28	4	20	12	4	4	4	12	8	0	8	4	0	8	8	4	12
8.5		4	16	8	0	0	24	0	16	8	6.66667	16	4	4	0	16	4	16	12	12	12	8	12	4	28	4	4	12	0	16	4	4	24	8	8	8	8	4	8	4	12	4	16	8	0	8	12	0	12
8.525		0	20	8	4	12	28	0	8	8	0	20	8	4	4	16	4	12	8	4	0	4	8	0	20	12	12	12	4	16	0	8	16	8	16	4	4	16	4	4	16	8	20	12	0	12	12	0	4
8.55		0	16	12	4	16	24	4	8	0	3.33333	12	12	0	4	12	0	8	16	8	0	16	4	0	12	8	12	12	4	12	4	4	16	4	16	8	4	24	4	12	12	4	12	8	4	8	12	0	4
8.575		0	8	12	4	4	16	4	8	0	6.66667	0	16	4	0	12	0	4	12	12	4	12	4	4	20	0	20	16	0	8	4	0	16	0	12	8	12	24	12	8	8	8	8	4	4	8	8	4	8
8.6		8	12	8	4	4	24	4	12	8	6.66667	8	12	4	4	20	4	8	8	12	4	4	8	4	20	0	16	16	0	12	4	4	24	4	16	12	8	24	8	4	8	4	8	8	0	16	0	8	8
8.625		12	12	4	4	4	32	12	12	16	3.33333	20	12	4	4	24	8	20	12	8	4	4	4	8	16	0	8	8	4	16	8	8	20	4	12	12	4	16	4	4	12	4	8	16	4	16	0	4	4
8.65		4	8	4	4	0	20	8	12	8	10	20	12	4	0	12	8	16	12	8	8	12	4	12	20	4	12	4	4	12	8	8	12	0	12	8	4	8	8	4	16	12	12	20	8	12	4	8	4
8.675		4	16	12	8	0	12	0	16	4	13.3333	8	8	0	0	12	12	16	8	8	8	20	4	8	24	8	8	12	0	8	16	4	8	0	12	12	0	8	4	12	20	8	12	16	4	4	4	8	4
8.7		4	12	12	16	0	20	0	16	4	10	8	4	4	4	20	12	16	12	8	4	8	4	4	20	4	20	12	0	8	12	4	12	8	16	16	0	4	0	12	16	4	12	4	0	4	0	8	0
8.725		8	4	16	12	4	24	4	16	4	6.66667	12	8	8	4	24	4	8	12	8	4	0	12	8	20	0	20	8	4	4	0	4	20	12	20	12	4	12	4	4	12	8	20	4	4	16	8	8	4
8.75		8	8	20	4	4	12	8	16	4	0	4	12	8	4	28	4	12	4	8	4	4	12	8	16	0	4	8	4	12	4	4	24	4	12	8	4	16	8	8	16	8	24	12	8	16	8	0	8
8.775		4	12	8	8	12	16	4	12	12	3.33333	8	8	4	8	24	8	8	12	8	0	20	12	0	12	8	4	16	4	16	4	4	8	0	12	8	4	4	8	8	16	12	20	12	4	12	4	0	4
8.8		8	12	4	16	12	32	0	16	28	6.66667	12	8	8	4	24	4	4	12	8	4	16	8	0	12	8	12	16	12	4	0	4	16	4	12	16	4	8	4	0	16	8	16	8	4	16	8	0	4
8.825		4	12	12	12	4	32	0	12	24	10	16	8	12	12	24	4	16	8	4	8	4	4	0	24	4	20	12	12	4	4	12	24	4	8	20	4	12	0	0	16	0	16	4	8	16	12	4	4
8.85		4	12	8	12	8	28	8	16	12	6.66667	16	8	8	12	20	4	12	12	4	4	12	4	4	24	8	16	12	4	8	8	8	16	4	8	8	4	8	4	4	16	0	20	4	4	8	12	4	8
8.875		8	8	0	8	4	20	8	20	20	6.66667	8	4	4	0	20	0	4	8	4	0	16	0	8	20	4	8	12	0	12	8	0	12	4	8	4	4	8	4	8	20	4	20	12	0	12	8	0	12
8.9		8	4	4	4	4	16	0	8	16	13.3333	4	8	4	8	20	0	16	8	4	0	12	4	4	12	4	8	20	8	8	4	0	12	0	16	12	8	12	8	8	20	4	20	12	0	16	8	4	4
8.925		8	4	4	8	12	20	8	12	0	6.66667	4	12	4	8	20	4	20	12	8	8	16	8	0	8	8	16	20	16	16	4	0	16	4	20	12	4	8	12	4	12	4	20	4	0	8	4	4	4
8.95		4	12	4	4	12	24	8	16	8	6.66667	8	4	4	0	12	4	12	8	8	12	16	8	0	16	4	20	16	12	20	8	8	16	4	12	8	0	4	8	0	12	8	12	12	4	8	4	4	4
8.975		4	20	12	4	8	24	0	12	12	13.3333	12	0	4	4	12	4	16	4	8	12	12	4	0	20	0	8	16	4	8	12	8	16	0	8	16	4	8	12	8	28	12	8	12	4	8	8	4	4
9		8	16	8	8	8	20	0	4	12	6.66667	12	8	4	8	20	4	20	20	4	12	16	8	0	24	0	8	12	0	8	12	4	20	0	12	16	8	4	8	8	28	8	12	4	0	12	4	0	8
9.025		4	4	0	8	4	16	0	8	16	6.66667	8	16	8	4	24	4	16	20	8	8	16	16	0	24	0	16	12	8	12	4	8	16	0	8	4	8	0	4	8	24	0	8	4	4	8	8	4	8
9.05		4	0	0	8	4	12	0	16	8	10	8	8	4	0	20	4	12	8	12	4	16	12	4	24	0	16	12	12	12	4	4	12	0	4	4	4	4	12	12	24	4	4	8	4	0	24	4	8
9.075		8	8	4	4	8	20	0	12	4	13.3333	8	4	0	4	12	4	8	12	8	4	8	16	12	24	0	12	8	4	8	4	4	12	4	12	12	0	8	12	8	24	8	20	8	4	0	28	0	8
9.1		8	20	8	0	4	28	4	16	16	16.6667	12	12	4	4	12	8	8	8	12	4	0	20	12	24	0	20	12	8	8	4	8	28	8	20	8	4	8	8	8	24	4	24	8	8	8	12	4	4
9.125		8	16	4	4	8	24	8	12	12	10	16	8	12	0	20	8	8	0	8	0	4	12	4	20	4	24	12	8	8	4	4	36	4	20	4	12	8	12	4	12	4	8	8	4	12	4	4	4
9.15		4	8	0	4	8	16	4	4	12	10	8	4	12	0	20	8	12	4	4	0	8	16	0	16	4	12	12	4	12	4	4	20	4	16	8	8	16	12	4	16	4	4	8	8	4	12	8	16
9.175		4	8	0	0	0	4	4	20	12	6.66667	4	12	4	4	20	4	16	16	4	0	12	12	0	16	0	12	16	12	8	4	4	28	4	12	8	8	20	4	4	16	0	16	12	8	8	12	12	12
9.2		8	8	8	4	8	12	8	24	12	10	8	16	0	4	16	4	12	20	0	4	12	0	0	20	0	8	12	12	8	0	0	20	4	12	4	16	20	4	0	16	0	20	16	0	16	12	4	4
9.225		4	16	8	8	12	16	4	16	16	13.3333	12	8	0	4	16	4	12	16	4	4	8	4	4	32	4	4	12	8	16	8	0	20	4	16	8	8	16	0	4	12	4	20	16	4	12	12	8	4
9.25		0	20	4	4	8	12	4	16	8	6.66667	16	4	4	12	24	4	8	16	12	8	4	8	8	20	8	8	12	4	12	12	0	24	0	16	8	4	8	0	12	8	8	24	8	4	8	8	8	0
9.275		4	16	8	0	4	20	4	12	8	6.66667	8	4	4	12	28	4	4	12	12	8	8	4	12	20	4	12	4	4	12	4	0	16	4	16	8	4	16	0	8	12	4	16	4	0	4	8	0	8
9.3		4	12	4	8	12	16	0	8	12	6.66667	4	4	0	8	16	0	12	8	8	4	12	0	12	28	4	8	4	4	8	4	0	24	8	12	16	0	12	4	8	4	0	12	4	4	0	4	4	8
9.325		0	16	0	12	12	12	0	8	4	3.33333	12	8	4	4	16	0	16	8	4	8	12	4	16	24	12	12	4	0	4	12	8	20	4	8	8	0	4	4	12	16	0	16	12	4	0	4	4	4
9.35		4	16	12	4	4	24	4	12	4	13.3333	8	12	8	4	28	4	8	8	0	12	16	8	12	24	12	16	0	8	4	16	16	12	4	8	0	0	8	0	4	20	0	16	16	4	4	12	4	20
9.375		4	4	20	0	12	24	4	8	8	16.6667	12	16	8	4	20	8	8	8	4	20	8	8	4	24	4	8	4	8	8	8	8	20	8	8	8	8	8	0	4	12	0	8	16	8	4	8	4	20
9.4		0	4	12	0	12	12	0	4	12	6.66667	20	20	8	4	24	4	24	4	12	12	0	12	4	16	4	4	4	0	16	4	4	24	4	12	8	8	4	4	8	12	4	8	12	8	0	8	4	4
9.425		4	16	8	4	12	16	0	8	12	6.66667	16	12	4	4	28	0	16	4	12	4	4	8	8	8	8	8	4	0	12	16	4	28	4	12	0	4	4	8	4	8	4	8	4	8	4	12	4	0
9.45		12	16	8	8	12	24	0	12	8	10	24	12	4	0	16	0	8	4	8	16	12	8	8	12	4	16	12	4	12	12	0	28	8	12	4	8	8	8	0	20	4	16	8	4	8	16	4	0
9.475		12	8	4	4	8	16	0	12	4	13.3333	16	16	8	4	8	0	8	8	4	12	8	12	4	16	4	24	12	4	12	4	0	24	8	12	8	8	8	8	0	28	4	16	8	8	8	12	8	0
9.5		4	16	4	0	8	12	0	16	8	6.66667	8	12	4	12	16	4	8	16	0	4	4	12	4	16	4	28	4	0	12	8	0	16	4	8	12	4	4	4	0	12	0	8	8	8	12	12	8	0
9.525		0	16	8	4	4	16	0	20	16	3.33333	12	8	0	8	16	4	20	8	4	4	12	12	4	16	0	16	4	0	12	8	12	20	4	8	16	0	8	0	0	8	4	16	12	0	12	12	4	4
9.55		4	8	16	4	12	24	4	12	24	6.66667	12	0	12	4	12	0	16	8	4	4	12	12	4	12	0	20	8	4	12	16	12	28	8	12	16	4	12	8	0	16	4	12	8	4	8	0	4	8
9.575		8	16	12	0	12	28	4	8	16	3.33333	20	4	12	4	16	0	12	8	4	4	12	12	0	12	8	24	8	12	12	20	0	32	8	20	12	4	8	8	0	20	0	12	8	4	4	8	4	4
9.6		4	12	12	12	0	20	0	4	4	3.33333	12	8	8	4	24	0	20	0	4	0	16	8	4	24	8	16	4	12	12	16	4	28	4	12	12	0	12	0	0	20	4	12	4	0	4	8	4	0
9.625		4	12	16	12	4	20	0	0	8	6.66667	16	4	8	4	28	8	16	4	4	8	12	12	4	20	0	12	0	8	12	16	8	16	0	12	8	0	8	8	0	24	4	16	0	4	16	0	8	4
9.65		4	16	12	4	12	24	0	4	12	6.66667	16	12	4	8	24	12	16	8	4	12	12	12	0	16	0	8	8	4	4	8	4	12	0	16	8	4	4	12	4	28	0	16	4	4	24	4	4	8
9.675		4	12	16	4	8	20	0	12	16	10	0	12	4	8	12	8	16	12	4	8	16	4	0	24	4	0	8	4	8	4	0	8	4	8	8	8	8	4	4	24	4	12	16	4	12	4	4	8
9.7		8	24	16	8	0	8	4	12	12	13.3333	0	4	4	0	20	8	8	12	8	4	12	4	4	24	4	8	8	8	8	8	8	12	12	16	12	8	4	16	4	12	4	20	12	8	8	8	4	8
9.725		16	24	16	24	4	20	4	16	12	10	12	8	4	0	28	8	12	8	12	0	12	4	4	12	4	16	8	8	4	12	8	28	8	24	24	8	0	20	8	8	0	24	4	8	12	12	0	12
9.75		16	12	16	16	8	32	4	12	16	10	16	4	0	4	16	4	12	4	16	4	20	4	4	12	4	8	0	8	12	12	8	32	8	20	20	4	0	4	8	20	0	16	4	4	4	8	8	8
9.775		8	16	12	8	4	24	8	0	12	13.3333	16	0	0	4	12	4	20	0	12	4	8	4	8	20	0	8	4	12	16	8	8	24	12	16	16	4	0	0	4	16	0	8	4	4	4	16	8	4
9.8		4	20	4	12	0	24	12	0	12	13.3333	16	4	0	8	4	4	16	0	4	4	8	4	4	20	4	20	8	8	12	12	4	24	8	8	12	4	8	4	0	12	0	16	12	4	4	12	4	12
9.825		0	20	0	8	4	20	12	4	8	13.3333	12	8	4	8	8	0	8	0	0	4	16	4	0	16	8	20	20	0	4	8	0	20	8	8	12	0	12	8	4	12	0	16	16	0	12	4	4	8
9.85		4	20	4	4	4	20	4	8	16	6.66667	8	8	8	8	16	0	16	4	4	4	12	0	8	28	4	12	24	4	4	4	0	12	8	16	16	8	20	12	4	12	0	12	12	0	16	4	4	0
9.875		4	8	8	12	8	32	0	12	12	6.66667	8	4	4	8	20	4	12	8	8	4	12	4	8	28	8	8	8	4	4	12	4	16	4	20	12	8	16	8	4	8	4	16	8	0	8	4	4	8
9.9		4	12	8	8	12	20	4	16	12	10	12	4	0	8	32	8	12	8	8	0	16	8	0	16	8	8	8	4	4	8	4	24	4	20	8	0	8	0	4	16	4	12	4	0	4	4	0	12
9.925		8	12	16	0	4	20	8	8	20	10	12	8	0	8	28	8	20	8	8	0	12	4	4	20	4	12	8	8	8	4	0	24	4	12	4	4	12	4	0	28	0	16	0	0	0	0	4	8
9.95		12	4	12	0	0	20	8	4	12	16.6667	12	4	0	0	24	8	12	12	8	4	4	4	4	12	4	12	8	12	4	8	4	24	0	4	4	8	8	16	4	16	4	16	0	0	4	0	4	4
ab4a, firing rate (Hz)
exposure cond.	E2-hexenal
n		12												11											11											10										10
stimulus, E2-hexenal (log[conc.])		solvent (0)	solvent (0)	solvent (0)	solvent (0)	solvent (0)	solvent (0)	solvent (0)	solvent (0)	solvent (0)	solvent (0)	solvent (0)	solvent (0)	-12	-12	-12	-12	-12	-12	-12	-12	-12	-12	-12	-11	-11	-11	-11	-11	-11	-11	-11	-11	-11	-11	-10	-10	-10	-10	-10	-10	-10	-10	-10	-10	-9	-9	-9	-9
time (s)
1.025		8	10	20	8	12	4	0	16	8	12	12	10	16	12	20	8	0	4	12	4	4	8	4	16	4	12	12	12	8	16	0	0	16	8	20	16	12	4	12	12	8	4	16	12	20	20	8	4
1.05		12	12.5	12	8	4	12	8	12	8	8	12	10	20	20	12	20	4	0	8	8	0	4	0	16	4	12	4	16	12	4	0	4	8	8	16	12	16	8	16	8	4	0	16	8	12	16	4	0
1.075		12	12.5	12	8	4	20	12	8	4	8	8	10	8	8	4	24	8	4	8	8	0	8	12	12	12	16	4	4	8	12	4	4	8	12	12	8	12	4	4	4	4	0	16	4	12	12	4	8
1.1		8	7.5	20	8	8	12	8	8	8	16	8	10	4	0	12	16	12	12	8	12	0	8	12	8	8	8	12	8	12	12	8	4	12	8	16	12	12	4	8	16	4	4	8	16	20	8	12	8
1.125		8	7.5	16	8	8	0	4	8	4	12	12	20	4	4	20	16	8	8	8	12	4	4	8	8	8	0	8	16	12	8	8	4	4	4	20	16	8	8	8	12	4	4	16	16	16	4	8	0
1.15		20	5	8	8	12	8	8	12	0	8	16	15	4	8	20	16	4	4	0	12	4	8	12	8	20	0	0	12	4	20	4	0	8	8	12	8	12	12	4	0	12	0	12	16	12	12	4	4
1.175		20	2.5	16	8	16	12	8	8	8	4	8	5	4	4	24	8	4	8	4	12	0	12	12	8	20	0	4	12	4	12	4	0	20	8	8	0	16	20	8	12	16	4	12	16	12	12	4	8
1.2		4	5	24	12	12	8	4	0	12	8	8	5	8	0	12	12	4	4	8	8	4	12	16	8	16	4	8	12	8	8	4	0	16	8	12	4	8	16	12	20	8	8	16	8	8	4	0	4
1.225		0	7.5	28	12	4	4	12	0	4	8	8	15	8	4	16	12	8	8	8	4	4	16	8	4	12	8	4	8	4	16	4	0	16	20	8	8	8	12	8	12	4	4	8	4	4	4	8	0
1.25		4	10	20	4	4	4	12	8	4	4	16	20	0	4	20	8	4	8	4	4	0	12	8	0	12	16	8	4	0	12	4	12	16	12	0	12	12	8	8	12	4	0	12	8	8	8	12	4
1.275		8	10	20	0	4	12	20	12	8	16	20	5	0	4	16	12	0	12	0	8	4	4	8	0	8	16	8	4	0	12	4	12	12	0	8	20	12	4	8	12	4	0	20	12	12	12	8	4
1.3		8	10	28	0	0	12	20	4	4	16	8	0	0	12	16	12	0	12	4	4	4	8	4	4	12	12	12	8	4	20	4	0	12	4	24	12	16	4	4	4	16	4	12	8	20	12	4	4
1.325		8	5	24	0	4	4	4	4	8	4	20	15	0	12	16	12	12	8	4	0	4	16	12	12	12	12	12	16	4	12	0	4	4	8	24	8	12	4	4	12	12	4	12	4	16	4	0	8
1.35		20	5	24	0	12	8	0	8	12	4	20	20	4	8	12	12	12	8	4	0	8	8	12	16	0	4	8	16	8	12	0	4	0	24	20	20	8	4	4	16	8	0	20	8	12	8	0	4
1.375		20	5	24	0	24	8	4	8	4	8	16	5	8	8	12	20	8	4	8	4	8	4	4	16	4	8	16	4	8	16	4	0	8	28	24	12	8	0	8	16	8	4	20	16	16	12	0	0
1.4		4	2.5	28	4	24	12	4	4	0	12	16	5	12	4	12	16	8	12	8	4	4	8	8	12	4	12	8	0	8	8	8	0	12	8	20	0	4	0	16	16	4	4	12	12	12	16	0	0
1.425		8	2.5	28	12	12	16	4	4	4	8	12	15	20	8	20	8	4	8	8	4	0	8	8	8	8	4	8	4	12	12	8	4	16	4	12	12	16	4	12	16	8	4	12	4	12	12	4	0
1.45		24	2.5	20	16	8	4	4	8	4	8	12	20	16	8	20	8	8	16	12	16	0	8	4	4	12	0	12	8	4	12	8	4	16	12	12	28	12	12	0	16	8	8	20	4	16	0	8	4
1.475		20	2.5	24	12	12	8	0	4	4	8	4	10	4	8	20	12	12	16	8	12	4	12	4	4	16	4	8	8	4	8	4	0	8	12	12	24	8	12	0	12	8	8	16	12	24	8	4	4
1.5		12	2.5	20	8	8	8	4	0	4	8	8	5	4	16	20	16	20	12	4	0	4	12	8	8	12	4	12	4	8	16	4	4	16	8	12	20	16	16	0	12	8	8	16	12	20	16	4	4
1.525		8	7.5	12	8	4	8	8	4	8	12	16	10	8	20	12	12	16	16	8	8	4	8	12	4	0	4	8	8	8	24	12	4	16	4	12	12	16	20	4	8	16	8	16	16	8	12	12	8
1.55		0	10	12	8	12	8	8	4	8	8	16	10	8	16	20	8	16	16	8	16	8	4	4	12	8	16	4	12	4	12	12	4	12	4	16	8	16	8	4	8	16	4	16	20	16	12	8	4
1.575		8	7.5	16	12	12	12	12	4	8	4	20	20	12	12	16	4	20	8	8	20	4	0	4	24	12	16	12	12	8	8	8	8	8	4	20	4	20	8	0	12	12	0	20	8	12	16	0	4
1.6		12	7.5	20	12	4	8	8	4	8	4	12	15	12	16	12	4	12	8	4	24	4	4	12	20	4	4	8	12	16	8	4	8	4	4	12	8	16	8	4	16	8	4	8	0	12	12	0	8
1.625		4	5	16	12	4	16	8	4	8	8	12	10	4	20	12	8	8	20	0	16	4	8	16	20	8	12	8	4	12	4	8	8	16	12	12	16	12	4	16	16	4	8	12	12	16	16	0	4
1.65		12	2.5	20	8	12	20	12	12	8	16	20	10	8	16	8	12	8	12	8	8	4	8	20	20	12	20	8	4	8	16	8	8	20	20	16	16	12	12	12	20	12	4	16	16	8	12	0	4
1.675		12	5	20	4	12	8	4	20	0	12	12	5	16	8	12	12	12	4	12	4	4	4	16	8	8	16	8	4	8	12	4	12	16	16	16	12	4	12	4	24	16	4	8	8	12	4	0	4
1.7		8	2.5	16	12	20	8	4	16	8	12	12	5	8	8	20	16	8	16	8	4	0	12	8	12	8	12	12	8	4	4	8	8	24	4	20	12	4	16	8	16	12	4	12	8	20	12	0	0
1.725		12	0	24	8	16	4	8	12	12	12	8	15	8	12	16	20	4	16	8	4	4	16	4	16	8	12	8	8	0	16	12	4	20	4	16	16	8	20	12	16	12	4	20	4	16	8	4	4
1.75		8	10	16	8	0	0	8	8	4	12	8	20	8	8	8	16	4	8	8	4	8	8	0	16	8	12	16	4	0	16	16	16	16	8	12	8	8	8	8	16	8	4	20	0	16	8	4	4
1.775		12	10	20	12	4	8	4	8	0	12	12	10	0	12	12	8	0	4	8	8	4	20	0	16	8	4	16	8	4	8	16	12	16	4	16	0	8	0	0	4	0	0	20	0	16	12	4	0
1.8		12	5	28	8	8	12	0	16	0	4	12	10	4	12	20	8	0	0	8	12	4	24	0	20	4	0	12	4	4	8	16	4	12	8	20	8	12	8	0	8	4	0	20	4	12	8	8	0
1.825		16	5	16	8	4	8	4	12	0	4	16	15	12	4	20	8	8	4	4	8	12	8	0	24	4	16	16	12	4	8	12	4	20	8	12	8	8	20	4	12	4	4	8	8	20	12	8	4
1.85		12	5	16	8	4	8	8	4	4	8	12	10	16	8	16	4	8	12	4	4	12	16	4	12	4	24	16	16	12	8	12	4	12	0	4	8	4	16	12	12	4	4	0	8	24	8	8	8
1.875		4	10	12	4	4	8	4	0	4	4	12	15	12	8	12	8	4	8	12	8	4	28	12	16	4	8	12	12	16	12	8	12	8	4	4	20	12	16	8	8	4	0	8	12	20	4	8	12
1.9		12	12.5	16	8	4	8	0	0	4	4	16	15	8	4	12	4	4	4	8	4	8	20	12	16	12	4	8	12	12	12	4	8	20	4	12	16	16	16	12	8	0	4	8	12	20	4	8	8
1.925		12	10	12	12	4	12	0	12	12	4	16	0	12	8	24	4	4	4	4	8	12	8	8	8	12	8	8	8	4	8	4	0	16	0	28	16	12	8	12	16	0	4	8	12	12	8	8	4
1.95		4	7.5	4	4	4	20	0	12	12	8	16	0	12	4	20	12	4	4	4	12	8	8	12	8	8	8	4	4	4	12	8	4	8	8	28	16	12	8	8	24	4	0	12	16	12	8	4	8
1.975		4	10	16	8	8	24	0	0	8	12	20	10	4	4	4	8	8	4	0	8	12	20	12	12	4	12	8	0	8	12	8	4	8	12	20	4	16	4	8	20	12	0	8	16	20	4	4	8
2		8	5	20	12	8	20	8	0	8	4	20	15	4	12	8	8	12	8	8	8	12	16	12	20	4	12	20	4	4	16	8	0	16	8	20	0	20	4	0	12	8	0	16	20	16	16	12	8
2.025		8	2.5	20	4	12	12	8	4	12	0	12	10	4	12	8	12	8	16	12	4	8	12	16	20	4	4	20	8	0	16	8	0	12	8	28	12	12	4	0	16	12	0	12	12	8	16	8	8
2.05		16	2.5	20	4	20	8	4	4	16	0	16	10	0	12	8	12	8	16	4	8	12	24	20	8	4	4	20	12	4	8	4	0	8	12	24	20	4	8	4	16	12	0	8	8	12	8	0	4
2.075		16	7.5	20	4	16	4	4	4	8	8	24	10	16	8	8	12	8	8	8	12	12	20	20	4	8	8	12	12	12	8	8	4	8	8	12	12	12	12	8	12	4	0	16	12	20	4	4	0
2.1		12	12.5	20	0	4	4	0	12	4	12	16	5	20	4	8	12	8	4	12	8	8	12	20	8	8	8	16	4	12	16	4	4	8	4	16	4	12	20	12	12	8	0	12	8	16	4	8	4
2.125		24	7.5	16	8	8	12	0	12	4	4	16	5	8	4	12	16	4	8	16	20	8	8	16	20	4	8	16	0	12	12	4	0	16	0	20	0	16	20	8	12	16	0	12	8	8	8	12	8
2.15		20	7.5	12	8	8	12	0	12	0	8	16	5	4	4	8	16	4	4	16	16	4	4	16	20	0	16	4	4	8	4	8	4	12	8	12	12	12	8	0	12	12	0	20	12	8	4	8	8
2.175		4	7.5	16	8	4	8	4	16	8	8	20	10	8	4	4	12	8	12	4	4	4	8	20	12	4	16	4	8	0	12	8	4	12	20	8	12	8	12	0	16	4	0	16	12	8	8	0	4
2.2		8	7.5	16	16	4	8	4	8	8	8	16	10	16	0	8	8	4	20	0	4	4	8	16	12	16	8	8	12	4	16	12	4	20	20	12	8	12	8	0	12	4	0	12	4	4	16	4	0
2.225		12	10	16	12	4	12	8	8	0	12	4	0	12	8	8	4	4	12	0	12	4	12	12	8	24	12	12	8	8	12	16	4	20	16	16	8	4	8	0	16	12	4	16	12	16	20	4	0
2.25		4	10	16	4	4	16	12	8	0	12	8	5	16	8	4	12	8	12	16	12	12	20	20	12	16	12	8	0	8	12	20	0	16	8	16	8	12	8	8	12	12	4	20	20	24	12	4	0
2.275		16	7.5	12	12	0	12	4	8	0	8	4	10	16	12	8	20	8	8	16	0	12	16	20	16	4	4	12	0	4	20	16	4	20	8	12	8	16	0	8	8	4	0	12	12	12	4	4	8
2.3		20	12.5	12	20	4	16	8	12	0	4	4	10	12	12	12	12	12	4	4	0	12	12	8	12	4	8	12	4	0	20	16	8	16	16	12	0	16	4	8	8	8	16	4	4	4	16	8	8
2.325		16	7.5	16	12	4	16	8	8	0	8	4	10	12	4	16	8	12	4	8	8	8	16	12	12	8	12	8	12	8	12	20	4	8	16	12	0	16	12	20	12	4	20	4	4	4	12	16	0
2.35		20	7.5	28	8	4	16	4	16	4	12	8	15	8	8	12	12	8	0	8	8	0	8	8	12	4	16	8	8	16	4	8	4	8	12	12	8	12	12	16	20	4	4	8	8	8	12	8	0
2.375		8	12.5	24	8	8	16	8	20	4	8	12	15	4	8	16	12	12	0	12	4	8	8	8	8	4	16	4	20	8	8	0	4	4	16	8	8	12	12	12	16	12	0	20	8	8	12	4	0
2.4		8	5	20	16	8	12	4	8	4	0	8	15	8	4	20	4	12	0	8	8	8	8	8	8	12	8	12	20	8	12	8	0	0	20	8	4	12	12	8	12	12	0	20	4	12	0	8	0
2.425		16	10	28	12	12	12	0	8	4	8	8	15	8	8	12	8	12	4	4	12	8	16	4	12	8	4	24	12	8	12	12	0	0	16	20	8	8	16	0	8	8	4	16	8	16	4	4	0
2.45		12	10	20	12	12	12	0	12	0	12	8	10	4	12	4	12	8	8	4	8	8	20	4	12	4	4	20	20	4	16	4	4	20	12	16	12	8	16	0	8	8	4	16	8	24	16	4	0
2.475		12	2.5	20	16	8	8	0	8	4	12	8	0	4	12	12	16	4	4	4	12	0	8	4	4	12	8	12	16	12	12	0	4	20	20	8	8	12	4	0	16	8	12	8	4	20	20	8	4
2.5		24	2.5	20	8	24	8	4	12	8	12	12	0	8	8	16	12	8	4	4	12	0	12	12	8	16	16	16	8	8	8	4	0	8	28	12	4	4	4	0	20	4	12	4	16	20	8	12	12
2.525		28	2.5	12	4	20	12	8	8	8	8	16	5	16	4	16	0	12	8	4	8	0	8	8	12	12	12	12	8	8	8	12	0	12	12	24	8	0	16	4	12	0	4	8	12	20	0	8	8
2.55		20	7.5	12	4	4	8	8	0	4	12	16	5	12	8	20	8	8	12	12	12	8	4	4	8	12	4	0	12	12	8	12	4	12	4	32	12	0	12	4	4	8	0	8	4	12	4	4	0
2.575		16	7.5	16	8	4	8	8	4	0	8	16	5	4	8	8	12	8	12	8	8	8	16	16	12	8	12	0	16	8	8	8	8	8	12	20	16	4	0	0	12	8	4	12	8	20	12	4	0
2.6		12	7.5	16	8	4	4	12	4	4	0	16	10	12	8	16	8	12	8	0	8	4	20	16	12	8	8	4	8	4	16	8	4	12	12	12	12	8	8	0	16	4	4	16	16	16	16	4	4
2.625		4	7.5	8	4	0	4	8	0	4	4	12	15	16	4	16	8	4	8	4	16	8	16	8	12	12	8	8	0	0	16	4	8	12	8	12	12	12	12	4	8	8	4	12	16	24	8	12	8
2.65		0	5	12	0	4	8	0	0	0	8	4	20	16	4	12	8	4	8	4	12	12	16	4	16	8	12	4	4	4	4	0	12	8	4	12	12	16	8	8	4	4	8	8	12	20	4	8	8
2.675		0	5	16	4	8	12	8	0	4	12	8	15	12	16	24	16	8	8	8	8	8	8	8	16	16	4	4	8	8	8	8	8	8	0	12	4	12	8	4	4	4	8	12	16	4	12	4	12
2.7		4	15	20	8	8	12	8	0	4	8	12	10	8	12	16	16	8	12	12	8	4	8	16	20	24	4	8	4	8	8	8	16	8	0	12	4	4	8	0	12	8	8	8	24	12	12	8	8
2.725		4	12.5	24	4	4	8	12	4	0	0	8	10	12	8	4	12	8	12	12	4	4	16	12	12	12	4	12	0	12	8	8	16	20	4	16	12	8	4	8	12	12	4	4	16	12	8	8	8
2.75		8	2.5	12	0	12	4	20	8	0	0	16	5	12	12	4	12	4	12	8	8	0	12	16	8	4	12	8	0	12	12	8	4	20	8	16	12	12	8	8	16	12	4	12	8	12	4	8	12
2.775		12	5	16	4	16	8	16	4	4	0	20	5	8	12	12	12	8	12	8	8	0	8	20	12	12	16	0	4	8	16	0	8	8	8	16	16	8	8	0	16	4	8	20	16	8	4	8	8
2.8		16	12.5	20	12	8	12	16	4	4	4	12	5	8	8	16	8	20	4	8	16	0	8	12	4	8	4	4	8	4	20	4	8	8	4	20	12	8	0	4	8	0	8	16	12	4	8	4	4
2.825		20	10	16	12	16	8	16	4	4	4	12	0	4	0	8	12	16	8	0	20	0	8	8	8	0	8	16	8	0	12	4	8	16	12	28	4	8	4	4	4	0	8	4	8	8	8	0	0
2.85		12	0	20	4	12	8	12	4	4	4	8	0	8	8	8	12	4	12	0	16	0	4	4	16	4	12	16	8	0	12	4	8	20	16	20	16	4	8	4	4	4	4	4	8	8	8	0	0
2.875		16	5	12	4	8	4	12	4	4	8	0	0	12	12	16	12	8	12	8	12	0	4	0	16	4	8	16	8	0	12	4	8	16	12	8	12	12	8	4	16	8	4	4	8	8	8	4	0
2.9		16	7.5	24	8	12	4	8	0	4	4	0	0	4	12	16	12	12	8	12	8	0	4	16	12	0	8	16	12	8	8	4	8	24	16	4	4	16	4	4	16	4	8	8	8	16	12	8	4
2.925		12	5	28	16	8	12	12	4	4	8	12	0	4	12	12	12	4	4	4	8	0	0	20	8	4	16	12	16	12	12	12	4	24	12	12	8	8	0	4	16	4	8	16	4	20	12	4	4
2.95		16	12.5	24	12	4	8	12	8	4	16	16	0	8	12	20	16	8	12	8	4	4	16	16	8	8	16	8	12	4	16	8	4	4	4	12	12	12	4	0	20	4	4	16	0	20	4	0	8
2.975		12	17.5	28	4	0	0	0	8	4	8	4	15	8	16	28	16	8	16	8	4	12	20	16	8	8	12	4	8	8	12	4	0	4	12	16	8	20	12	4	12	0	4	16	8	16	0	4	16
3		12	7.5	16	0	0	8	8	8	8	0	8	20	8	16	12	8	4	20	4	4	8	12	8	8	12	12	4	4	12	8	8	0	12	16	20	12	16	12	4	12	4	8	20	20	8	8	8	8
3.025		24	5	16	4	8	12	8	4	8	4	12	10	8	12	8	16	4	12	4	4	4	16	8	12	12	4	8	16	8	8	8	0	12	4	12	16	4	12	0	12	4	4	20	20	12	12	12	8
3.05		32	5	20	8	20	16	4	8	4	8	8	5	12	8	12	20	0	4	0	4	4	8	4	12	12	8	12	24	8	16	8	4	4	12	16	16	4	8	0	8	4	0	12	8	8	8	12	8
3.075		24	7.5	16	8	16	16	4	12	4	12	16	0	16	4	20	8	4	8	8	0	4	4	8	4	16	12	12	12	8	16	8	8	0	16	12	12	8	8	0	16	4	0	8	8	20	8	4	4
3.1		12	7.5	12	4	16	8	4	8	12	12	12	0	8	4	20	8	8	8	8	4	8	12	12	12	12	12	12	8	8	16	8	8	4	16	24	8	8	8	4	16	4	4	4	12	20	4	4	4
3.125		8	2.5	12	12	12	4	8	12	12	12	12	0	12	16	4	8	4	16	8	4	8	16	12	12	4	8	8	4	8	12	8	4	16	16	24	16	16	8	4	16	8	8	0	8	0	8	8	8
3.15		8	2.5	8	12	12	8	4	16	4	20	20	0	16	16	16	8	4	12	12	4	4	12	12	4	4	4	8	4	8	4	8	0	16	12	12	8	16	12	8	20	16	8	8	12	4	8	8	8
3.175		8	5	4	8	20	12	8	8	0	16	16	5	4	12	20	12	4	0	8	8	8	8	4	8	4	12	4	4	8	4	4	0	12	12	12	4	8	4	12	12	12	8	16	16	12	8	8	0
3.2		4	7.5	4	16	8	16	8	8	0	16	16	5	0	20	4	12	4	8	4	12	8	8	4	12	4	8	0	8	4	8	4	4	16	8	4	12	16	4	8	16	0	4	24	16	16	16	8	8
3.225		12	2.5	8	12	0	12	4	8	0	28	12	0	4	20	8	4	8	12	8	8	0	12	12	8	4	4	8	12	8	8	4	12	16	4	8	12	12	4	8	24	8	8	16	16	20	16	8	12
3.25		20	12.5	12	8	4	0	4	4	4	20	8	15	8	8	12	0	8	12	12	8	4	8	8	4	16	12	12	8	8	4	4	8	12	8	24	16	8	4	8	16	12	8	8	20	16	16	8	4
3.275		20	12.5	4	8	12	4	0	8	12	8	16	15	8	0	4	0	4	12	8	8	4	16	4	12	20	12	4	4	0	4	4	4	12	16	28	12	8	4	8	8	4	0	8	20	16	8	4	4
3.3		24	5	16	8	8	8	0	12	8	12	12	5	8	4	8	4	16	8	4	0	4	24	4	16	16	8	12	12	4	12	4	4	12	8	16	4	0	8	12	12	0	0	4	12	16	12	4	8
3.325		12	10	20	4	8	8	0	12	0	16	4	15	4	8	20	4	20	4	4	8	4	16	4	16	16	8	12	16	8	16	4	4	16	8	8	12	0	8	12	16	4	4	12	8	8	12	4	8
3.35		16	12.5	12	16	8	8	0	16	4	8	8	15	0	8	20	4	4	4	4	12	4	12	4	12	16	12	4	8	8	8	12	4	20	8	12	12	8	4	4	20	12	8	16	12	8	8	16	4
3.375		20	10	16	16	4	8	4	16	4	8	8	10	0	4	12	12	8	8	8	4	8	8	8	4	16	8	8	4	8	8	20	8	16	4	8	12	12	12	12	12	12	8	20	20	12	12	20	4
3.4		16	7.5	16	4	4	4	8	8	4	16	4	15	4	4	12	16	8	12	16	0	8	12	8	8	12	12	4	4	4	4	8	12	12	8	16	20	4	12	16	8	4	4	20	16	16	8	16	8
3.425		16	12.5	16	8	12	0	8	4	4	12	8	25	4	12	16	16	8	8	12	4	4	16	4	8	12	16	4	16	8	12	0	4	12	8	24	16	12	4	8	16	8	4	20	8	20	8	20	12
3.45		8	12.5	16	8	16	8	4	12	8	8	8	25	8	8	16	24	12	8	12	4	0	12	8	4	4	8	4	12	8	16	8	0	8	8	12	8	20	8	4	8	16	8	16	16	20	8	8	8
3.475		8	10	16	12	8	8	0	12	12	12	8	15	20	4	12	16	4	8	8	4	4	12	4	4	4	4	4	4	0	8	16	4	8	8	16	4	16	16	4	4	20	8	8	12	16	4	0	4
3.5		8	10	16	16	12	4	0	4	8	4	8	10	20	8	4	4	12	8	8	12	8	12	8	0	8	4	4	12	4	8	8	4	8	8	16	12	16	12	8	12	20	8	12	8	16	8	8	8
3.525		12	10	24	16	8	8	4	4	8	4	8	15	12	8	8	12	20	8	8	8	8	16	8	4	8	12	12	12	8	8	0	0	0	8	4	16	12	4	8	8	12	8	12	12	20	8	20	8
3.55		12	7.5	28	8	0	8	8	8	4	12	12	10	4	4	16	16	8	0	0	8	8	12	4	8	4	12	20	12	8	8	0	0	8	4	12	4	4	4	4	4	4	4	12	8	24	8	12	4
3.575		12	5	32	4	4	4	4	12	0	20	16	0	0	16	12	16	4	8	4	16	8	12	8	12	0	16	12	12	4	4	4	0	16	8	16	4	8	8	4	4	8	0	8	12	20	8	8	4
3.6		16	7.5	20	4	12	12	4	12	4	16	12	10	0	24	8	8	8	8	4	16	4	20	8	8	0	16	0	4	12	8	12	0	16	12	20	8	16	8	12	16	20	0	8	20	20	4	12	12
3.625		12	5	4	4	8	16	8	8	4	16	4	15	8	8	8	12	12	0	4	16	4	8	4	0	4	8	4	8	16	12	12	4	16	12	16	4	16	16	20	24	12	0	12	16	20	12	16	8
3.65		4	2.5	16	4	12	12	8	8	0	16	12	10	12	8	8	16	12	8	8	8	8	4	4	8	8	4	8	16	12	8	8	4	16	8	8	8	8	12	20	12	8	4	8	16	12	12	16	0
3.675		4	5	28	8	20	12	4	8	0	4	12	5	8	8	12	12	16	8	4	8	4	8	16	8	12	4	8	8	8	12	8	0	16	8	20	12	8	8	12	12	16	4	16	28	12	8	4	0
3.7		16	10	24	12	8	4	12	4	0	4	8	10	16	4	16	16	16	8	0	8	4	12	16	4	16	8	8	0	4	12	8	0	12	12	20	4	12	4	12	16	8	4	28	20	16	4	4	0
3.725		24	10	20	8	4	0	16	12	0	12	12	15	16	16	12	8	8	8	4	4	4	12	12	4	12	12	8	8	12	12	8	0	16	16	20	12	4	0	8	12	8	4	16	12	8	8	8	0
3.75		24	7.5	24	12	12	0	8	20	0	8	12	25	12	12	4	4	12	4	8	8	4	12	8	4	4	16	8	8	12	12	4	0	24	12	16	16	0	8	8	8	8	0	8	12	8	12	8	4
3.775		16	10	20	16	8	0	8	20	4	4	4	20	12	8	4	12	8	8	8	8	8	8	8	12	4	20	8	4	8	4	8	8	12	8	16	16	8	12	20	16	4	4	12	8	16	16	4	4
3.8		16	12.5	12	20	8	4	8	12	8	4	0	0	12	12	8	12	4	8	8	8	8	4	12	12	8	20	12	8	8	4	12	8	12	8	24	16	8	12	16	16	4	4	4	4	16	20	16	4
3.825		16	12.5	12	12	12	12	12	12	4	0	12	5	8	12	4	8	8	4	4	12	4	4	16	4	12	8	12	12	8	8	8	0	12	4	16	8	8	20	16	8	4	0	8	4	16	8	20	4
3.85		4	15	12	8	4	8	8	8	4	4	20	5	0	16	4	8	12	4	4	8	0	0	12	4	16	12	8	8	8	8	8	0	0	8	8	12	12	20	12	8	8	0	12	16	12	8	8	0
3.875		0	10	8	8	4	8	8	4	8	12	16	10	0	8	4	8	16	8	12	4	4	8	8	4	4	8	8	4	12	8	12	8	4	12	8	8	12	8	4	8	12	0	4	16	12	8	4	0
3.9		4	12.5	8	8	4	12	8	4	4	8	12	10	4	4	4	8	8	4	12	4	4	20	8	12	4	4	16	4	8	12	8	8	8	16	12	4	12	4	4	12	12	8	8	8	24	8	4	0
3.925		8	12.5	20	8	4	8	0	0	0	4	4	0	4	4	8	8	8	8	12	4	4	12	0	20	12	4	12	4	4	12	12	12	12	12	16	4	8	4	8	12	4	8	20	20	16	20	4	4
3.95		16	5	24	12	0	12	4	0	0	12	0	10	4	4	12	4	12	8	12	4	8	12	4	12	8	4	4	16	4	12	16	16	16	4	20	4	4	4	8	12	4	4	12	20	0	16	0	4
3.975		20	2.5	12	12	4	8	8	0	12	8	4	20	4	4	16	0	8	8	12	0	8	12	8	20	0	8	12	24	4	16	12	12	12	8	20	16	0	0	0	12	8	8	12	4	12	12	4	0
4		12	2.5	16	8	8	4	4	4	16	8	12	15	4	4	16	0	4	16	8	0	4	4	4	20	4	8	12	16	8	16	12	12	12	12	16	12	12	4	4	12	12	4	20	0	20	12	12	4
4.025		12	7.5	28	8	4	8	4	4	4	12	8	5	8	12	12	8	4	20	0	0	0	4	4	12	4	12	8	8	8	8	8	4	16	8	12	12	16	12	12	12	8	8	16	12	12	8	12	4
4.05		12	15	20	4	12	8	8	4	8	4	4	5	4	16	4	12	8	12	4	8	0	4	8	16	0	20	8	8	8	4	4	4	16	12	12	16	8	12	12	4	8	12	12	16	20	8	4	4
4.075		8	12.5	24	8	12	12	8	4	16	4	16	15	12	16	4	12	8	0	8	8	4	16	4	12	8	12	12	4	8	8	8	8	8	16	16	4	8	16	12	16	8	4	12	12	16	4	16	8
4.1		4	5	36	8	0	16	12	4	8	12	12	15	16	12	8	20	12	0	4	8	4	16	0	8	12	4	12	8	8	12	12	4	4	16	16	16	8	24	8	24	4	0	12	8	8	4	20	8
4.125		8	2.5	24	12	0	8	16	4	8	12	4	15	8	4	12	12	12	0	0	8	8	12	0	4	8	4	4	20	4	16	4	0	4	8	28	24	12	12	0	16	12	4	8	8	16	20	8	4
4.15		12	5	16	12	4	8	12	0	8	4	8	15	16	8	20	4	4	4	0	0	8	20	4	0	4	0	4	16	0	12	4	4	4	8	28	16	16	4	0	12	8	8	8	12	12	16	8	4
4.175		20	10	16	12	8	8	16	0	8	0	8	10	16	16	16	12	8	8	0	4	4	16	8	8	8	4	8	12	0	12	4	4	12	16	20	16	8	4	8	8	12	8	20	4	8	8	4	4
4.2		24	7.5	16	16	8	0	12	4	12	4	4	15	12	12	4	12	8	12	0	8	4	16	8	8	12	4	12	12	0	12	12	4	12	8	16	8	0	0	12	12	12	12	24	8	20	12	0	0
4.225		12	5	16	8	8	12	4	12	8	4	0	15	12	8	4	8	4	12	8	4	8	16	12	8	12	8	8	8	12	8	12	8	8	4	20	4	8	4	8	8	8	12	16	12	28	12	8	0
4.25		8	7.5	8	0	4	16	4	12	8	4	4	10	8	4	8	16	12	4	8	8	12	20	8	16	8	8	4	12	16	4	8	8	4	4	20	8	12	4	8	12	12	4	16	12	28	12	12	0
4.275		12	5	8	4	8	20	8	4	4	8	4	10	12	8	8	20	12	4	4	8	4	16	0	8	4	0	4	16	8	12	12	4	16	8	28	8	8	4	12	20	8	4	8	8	16	4	8	0
4.3		24	5	12	12	8	12	8	8	8	4	4	15	16	8	12	12	8	4	8	0	0	4	8	4	8	0	4	8	4	16	12	4	20	16	28	12	4	8	12	16	4	4	8	8	16	4	8	0
4.325		16	7.5	16	8	4	4	0	12	8	4	8	15	16	0	12	8	12	8	4	0	0	8	12	8	8	0	4	8	8	16	12	4	16	8	12	16	0	8	8	16	4	0	16	20	16	4	8	4
4.35		12	10	20	4	12	8	0	4	0	4	8	20	12	0	4	8	8	8	0	4	8	12	12	4	8	4	8	12	16	12	4	4	16	0	16	12	4	12	8	12	4	0	8	12	20	8	4	4
4.375		16	7.5	16	4	8	8	0	0	4	0	12	15	4	8	0	8	0	4	4	8	12	8	12	0	8	12	8	8	12	12	0	8	4	4	12	16	8	8	4	12	4	4	8	4	20	20	4	0
4.4		12	5	16	8	20	4	4	4	4	8	16	5	4	12	0	12	16	8	8	8	8	16	12	4	4	8	16	8	8	20	4	8	8	4	20	16	8	8	12	16	8	4	16	4	12	12	8	4
4.425		16	5	16	12	24	0	4	4	0	8	12	15	8	8	8	16	16	8	4	8	12	20	12	12	8	8	16	4	8	8	8	4	12	4	12	8	12	12	16	8	8	8	16	4	8	4	16	8
4.45		16	5	20	12	12	4	0	4	0	8	4	10	4	8	16	8	4	12	0	4	8	8	8	8	16	16	0	4	12	8	12	0	12	8	12	12	16	16	4	16	8	8	16	12	4	8	12	4
4.475		16	5	20	12	8	4	0	4	4	16	8	0	4	4	12	8	12	16	4	0	4	12	8	8	12	16	8	4	8	8	12	4	12	12	16	16	12	16	8	16	12	0	12	20	8	8	8	4
4.5		20	5	12	12	4	4	4	4	4	12	12	0	8	8	4	8	12	12	8	0	8	20	12	12	8	16	16	4	4	8	8	4	8	12	12	8	12	12	8	16	8	4	12	16	12	12	16	8
4.525		16	10	12	8	12	4	4	4	8	12	8	0	12	12	4	8	12	8	8	4	4	12	12	12	8	8	12	8	8	8	16	8	16	16	24	4	8	8	16	12	4	12	16	12	8	16	8	8
4.55		8	12.5	16	8	12	4	0	0	8	8	12	0	12	4	12	12	12	8	12	4	0	8	12	12	4	0	8	8	8	4	20	8	12	12	20	4	4	0	24	12	4	8	12	12	16	12	12	8
4.575		8	7.5	16	8	4	8	4	4	0	8	16	5	8	4	16	4	16	4	12	4	4	12	8	4	8	12	8	12	4	12	12	0	8	8	16	8	12	0	12	16	0	4	8	20	16	8	12	4
4.6		12	0	20	8	4	4	12	8	0	12	16	5	8	12	8	0	16	4	8	4	4	12	0	0	8	12	12	16	8	12	4	4	12	24	16	20	8	4	12	16	4	8	12	16	8	8	12	4
4.625		16	2.5	24	8	8	0	16	8	4	4	12	5	4	8	0	8	8	4	8	4	0	12	4	4	8	0	16	12	16	16	4	4	4	20	12	12	8	4	16	16	8	4	20	12	8	8	16	4
4.65		20	10	12	0	8	0	8	4	4	4	12	10	8	4	8	12	16	0	8	8	0	12	8	12	8	8	12	8	12	24	16	12	8	8	16	4	12	8	12	16	4	8	12	16	4	12	4	0
4.675		20	10	12	4	4	0	8	12	4	4	16	5	8	4	8	8	12	0	4	12	4	4	8	8	8	8	8	12	8	16	20	12	12	8	16	4	8	20	8	12	4	8	12	8	8	12	4	8
4.7		8	10	20	4	8	0	12	12	8	0	20	10	12	0	8	8	0	0	4	20	4	0	8	4	16	0	4	16	8	8	12	4	4	12	12	4	8	16	4	12	12	0	16	8	20	4	16	8
4.725		12	12.5	24	0	16	4	8	0	8	4	20	10	12	4	12	8	8	4	4	16	4	0	12	8	16	4	4	8	8	8	4	8	8	16	12	12	8	8	4	16	8	4	8	16	20	0	20	4
4.75		20	7.5	24	0	16	12	8	4	12	8	24	0	4	8	8	12	20	12	0	4	8	12	16	4	12	8	8	0	8	12	0	4	8	20	12	8	12	8	12	12	4	8	4	16	20	0	12	8
4.775		16	10	24	8	8	16	8	12	12	4	16	0	4	16	12	12	12	8	8	4	4	24	8	0	8	4	8	4	12	16	0	4	4	16	12	12	12	8	12	12	4	4	4	16	20	8	8	8
4.8		12	10	20	12	8	8	4	8	8	4	8	0	4	24	16	8	8	4	12	4	0	16	0	4	8	4	20	8	12	12	4	8	8	8	12	20	8	16	12	16	8	0	16	12	16	12	8	4
4.825		20	10	12	12	8	8	4	8	8	8	16	5	8	16	12	4	12	8	8	12	4	8	0	4	4	8	32	12	16	4	8	4	8	8	8	12	8	12	16	16	16	4	16	8	20	8	8	0
4.85		20	10	24	8	4	12	8	8	16	8	12	5	12	12	16	4	12	12	4	16	4	16	4	4	0	4	16	20	16	4	12	4	16	16	8	8	12	8	12	16	12	4	12	8	16	4	8	4
4.875		12	5	20	4	4	4	4	4	16	4	12	0	8	16	24	8	4	12	4	4	4	20	12	4	4	12	4	12	8	8	8	4	12	24	12	8	12	8	4	16	4	0	12	8	20	8	8	12
4.9		20	10	16	8	0	12	0	8	4	8	12	0	4	8	16	8	4	4	12	0	12	12	8	4	4	24	4	16	4	12	4	4	8	16	20	16	12	8	4	8	0	4	12	12	12	8	8	8
4.925		20	12.5	24	16	4	20	12	4	0	16	12	10	12	8	12	8	8	0	12	12	12	4	16	8	4	12	8	24	4	12	4	4	12	12	16	12	12	8	4	16	4	4	8	12	8	4	8	0
4.95		8	12.5	20	16	8	8	20	0	0	12	16	10	8	12	8	8	8	8	8	12	8	0	16	4	8	12	12	12	4	8	0	4	4	12	8	4	8	4	0	16	8	8	8	12	16	8	8	0
4.975		0	12.5	16	8	4	0	16	0	8	12	12	0	4	12	4	8	8	8	8	8	4	12	4	12	4	20	4	8	4	8	8	4	0	12	8	4	4	4	4	0	8	8	8	12	16	4	8	4
5		8	10	16	12	4	8	12	0	8	16	12	0	8	8	8	12	8	4	8	8	4	16	8	20	0	8	0	8	8	12	12	8	0	12	12	4	4	8	8	8	8	0	4	16	12	12	12	4
5.025		8	5	20	20	4	16	12	4	4	8	8	5	4	4	16	8	8	4	8	12	8	4	12	12	0	4	8	8	4	20	8	8	8	8	16	8	16	12	8	12	8	0	16	16	12	16	12	4
5.05		4	5	24	16	8	8	16	8	8	4	4	10	4	8	16	4	8	0	4	20	4	4	12	4	4	4	12	8	4	12	8	4	12	4	20	4	20	12	4	8	4	4	12	20	20	8	8	4
5.075		8	7.5	24	12	8	0	12	4	8	8	8	10	8	4	4	4	4	4	0	20	4	8	8	0	8	12	12	8	12	12	12	4	8	4	24	0	16	16	4	8	0	4	8	16	24	20	8	0
5.1		12	10	20	20	0	4	4	0	8	4	16	10	8	4	8	4	4	8	4	16	4	12	20	8	12	12	12	20	16	20	12	0	24	12	16	4	16	12	8	12	0	4	16	8	16	16	4	0
5.125		12	15	16	20	8	4	0	8	8	4	16	10	8	12	20	12	4	8	12	12	0	12	20	8	12	12	12	16	16	12	8	0	24	12	20	16	8	4	8	12	0	4	12	16	12	16	8	12
5.15		12	15	20	16	12	0	0	8	8	4	8	10	8	8	24	16	16	8	12	8	4	8	12	8	12	12	12	4	8	12	8	4	8	12	16	16	8	12	8	12	4	4	4	16	12	20	12	12
5.175		16	10	32	12	8	4	8	0	8	0	4	15	12	12	16	12	20	4	4	4	4	4	20	12	8	4	8	12	12	12	8	4	8	16	12	8	12	16	8	12	8	12	4	12	8	8	16	8
5.2		8	7.5	24	12	12	4	12	8	4	8	12	20	20	12	12	12	12	4	4	4	0	8	12	8	4	8	12	8	8	16	8	4	4	12	16	16	8	8	4	8	4	8	12	12	12	8	16	12
5.225		8	7.5	20	12	8	4	8	12	12	12	12	10	12	12	12	12	16	12	8	4	0	16	4	8	12	12	16	0	12	16	8	8	4	8	16	16	16	4	4	16	8	8	12	8	12	4	12	8
5.25		12	5	24	4	12	12	8	4	12	8	4	5	4	12	8	12	8	12	8	8	4	8	8	4	12	12	16	12	16	8	8	8	12	4	20	8	20	8	4	24	8	8	12	20	12	8	8	4
5.275		16	7.5	16	4	16	16	12	8	4	12	12	5	4	8	4	16	0	8	16	12	4	12	4	0	12	12	12	20	8	8	4	12	20	8	16	12	8	12	4	12	0	4	16	12	8	16	4	4
5.3		20	10	12	8	12	8	12	8	4	12	8	10	4	8	0	8	4	8	12	16	0	16	0	12	12	16	16	12	8	12	0	8	20	12	4	16	0	8	4	12	0	8	20	4	20	12	4	4
5.325		12	7.5	20	12	8	0	4	4	4	8	4	10	4	4	4	4	12	4	0	16	4	12	8	16	12	12	20	8	8	12	4	0	20	4	12	12	0	4	8	12	4	8	12	16	28	12	4	4
5.35		4	10	28	12	12	8	0	8	16	8	20	10	4	8	8	4	12	12	4	16	8	20	16	8	8	8	12	12	8	8	8	4	16	0	16	12	16	4	8	4	12	4	8	20	8	16	8	4
5.375		12	7.5	12	8	16	12	8	12	16	8	20	20	8	4	8	4	4	16	8	8	4	16	16	8	4	8	8	16	16	12	12	4	12	4	16	12	20	8	0	8	8	8	20	12	12	16	8	4
5.4		16	5	4	16	4	4	12	12	8	8	8	10	8	4	8	4	0	12	4	0	4	12	16	8	12	8	8	12	16	8	8	0	12	4	20	16	12	4	0	8	8	12	12	8	20	8	4	4
5.425		12	5	16	16	0	8	8	8	8	12	8	10	4	4	12	4	8	20	8	0	4	16	12	4	12	12	4	8	8	8	8	4	4	12	12	20	16	12	8	4	16	8	4	16	20	12	8	8
5.45		8	5	24	8	0	8	8	4	8	16	4	15	4	8	12	16	12	20	12	0	0	20	8	0	20	12	12	8	8	12	8	4	16	20	12	12	12	12	16	8	12	8	8	12	20	24	12	8
5.475		4	7.5	20	4	8	4	8	4	12	8	0	10	8	12	8	16	8	8	4	4	0	24	12	4	20	12	12	8	8	8	0	4	24	12	12	4	12	12	8	16	8	4	16	8	12	20	8	0
5.5		20	7.5	20	4	8	8	8	4	12	8	4	10	8	4	8	8	4	12	0	4	4	24	8	4	8	12	0	4	8	8	8	4	8	12	24	4	12	20	0	16	4	4	16	12	16	8	8	4
5.525		20	7.5	32	12	4	8	8	8	8	8	8	10	8	8	8	16	8	16	8	4	8	12	4	4	8	8	4	4	8	16	8	4	4	12	24	4	8	12	0	16	4	8	12	8	20	12	8	4
5.55		16	2.5	28	8	16	8	8	12	8	0	12	10	12	8	12	16	16	4	16	8	4	0	4	4	12	12	8	8	16	12	4	4	8	12	12	4	8	12	0	20	12	12	20	8	12	16	8	4
5.575		16	2.5	20	4	16	4	8	8	8	4	16	10	12	8	8	4	12	4	8	4	0	8	0	4	8	12	16	4	20	4	4	8	16	8	20	8	8	16	0	12	12	8	16	12	4	8	8	4
5.6		12	10	16	4	4	0	4	8	8	8	16	10	8	12	4	0	8	4	0	0	0	12	0	4	0	4	20	0	12	12	4	8	16	8	24	8	4	16	8	16	12	4	12	8	12	12	12	0
5.625		12	7.5	4	0	4	0	0	12	12	8	16	15	8	8	12	8	4	0	4	4	0	12	8	4	8	8	24	0	4	16	8	4	4	12	12	4	8	12	16	20	12	4	16	16	16	8	12	0
5.65		8	7.5	12	4	4	8	0	8	8	8	16	15	12	12	16	12	4	4	4	8	4	20	12	8	12	16	24	4	0	8	12	4	20	12	8	0	12	8	16	4	12	4	12	16	8	4	8	4
5.675		8	10	20	8	4	8	4	4	0	8	12	5	12	16	12	4	8	8	4	4	4	12	4	4	8	16	16	4	4	4	8	4	28	16	24	12	4	12	16	12	8	4	12	8	8	12	8	4
5.7		12	5	16	4	4	4	4	12	12	4	12	10	8	8	12	12	4	4	8	4	0	8	8	8	8	8	8	4	8	16	0	4	12	16	36	16	8	16	8	12	8	0	16	12	8	12	4	4
5.725		12	5	16	8	0	8	12	12	16	4	12	15	8	4	12	12	8	16	12	4	0	20	12	12	12	4	4	12	4	24	0	0	12	16	24	4	16	12	12	8	8	0	12	8	8	8	4	8
5.75		12	10	20	12	0	12	12	12	8	16	16	5	16	8	8	8	8	16	12	4	8	20	12	8	12	8	4	16	0	24	4	0	20	12	12	4	12	8	8	8	4	0	12	4	20	4	8	4
5.775		8	10	12	8	0	8	4	12	4	20	12	0	16	8	12	8	8	8	8	8	8	12	8	4	12	4	8	12	20	16	4	0	12	12	20	4	12	8	4	12	12	4	16	4	24	0	12	8
5.8		0	10	8	8	4	0	4	8	0	20	4	0	4	8	12	0	8	8	8	8	0	12	8	8	16	4	16	4	20	12	4	0	8	20	16	0	8	4	4	20	8	16	12	8	12	4	12	8
5.825		8	12.5	20	4	8	4	4	12	4	20	8	15	8	4	8	0	4	4	12	4	8	12	20	12	8	8	12	4	4	12	4	4	12	20	8	12	0	4	4	12	12	16	4	8	20	4	4	0
5.85		12	7.5	24	0	4	4	4	8	4	16	4	15	8	4	4	4	12	8	8	4	8	12	12	4	4	4	4	4	4	12	4	4	12	16	12	16	12	8	8	16	12	4	4	4	24	4	0	4
5.875		4	5	24	0	4	8	4	4	4	16	8	5	8	4	8	8	8	12	4	8	8	8	4	4	4	8	0	0	4	8	8	4	12	16	12	4	16	4	8	24	4	12	12	0	20	4	8	4
5.9		8	2.5	16	12	4	8	8	4	4	16	12	10	12	4	20	4	8	8	4	8	8	4	4	12	8	12	8	4	4	12	12	4	12	12	12	4	8	8	16	16	12	12	12	4	16	4	8	4
5.925		8	5	8	20	4	4	8	0	0	16	16	5	8	4	16	4	8	12	8	12	4	12	4	8	12	8	8	12	8	12	8	0	12	12	16	8	12	16	20	12	16	8	4	4	16	4	8	4
5.95		4	10	12	12	8	8	12	0	8	20	24	5	4	0	4	4	0	24	16	16	8	8	12	0	4	4	0	16	12	8	4	0	12	12	16	12	16	8	12	8	20	12	8	8	28	4	12	0
5.975		12	10	12	12	4	4	12	4	20	24	20	15	8	4	0	8	4	12	8	12	8	0	12	0	4	4	8	12	12	20	8	0	16	4	16	16	8	0	16	4	12	8	8	20	28	4	12	0
6		8	10	8	12	4	8	4	4	12	20	24	15	8	4	8	20	8	12	16	4	12	8	12	0	12	4	8	8	12	16	12	0	12	8	16	12	0	0	28	16	0	4	12	24	20	4	8	0
6.025		0	12.5	12	20	8	12	12	4	0	12	16	15	8	8	12	20	16	28	16	0	12	16	12	0	12	0	8	12	4	8	8	0	12	12	12	8	0	0	20	16	4	4	20	16	16	4	8	0
6.05	odor on	8	12.5	16	20	12	4	12	8	4	24	12	10	8	8	12	20	16	16	4	4	8	12	12	0	16	4	16	16	0	8	8	4	12	16	20	8	0	4	4	8	8	4	12	12	12	0	20	4
6.075	odor on	8	7.5	12	8	8	12	0	8	8	20	16	5	4	0	16	12	4	0	8	8	8	12	12	4	16	12	12	16	4	12	8	4	12	16	20	4	4	8	4	8	8	12	16	16	8	12	12	8
6.1	odor on	8	7.5	4	4	12	16	12	8	8	12	12	15	8	4	16	4	8	8	4	12	16	20	4	4	12	8	8	12	12	20	8	0	12	12	8	4	8	8	8	4	12	16	12	16	12	12	12	4
6.125	odor on	16	12.5	12	0	20	4	24	4	4	16	12	10	4	8	16	8	8	8	0	12	12	16	4	4	12	12	8	12	8	12	8	0	16	12	8	4	4	12	12	8	8	8	8	12	12	4	20	0
6.15	odor on	16	15	24	4	12	0	24	8	8	12	4	10	4	4	8	12	0	4	8	8	0	12	12	8	8	20	8	20	8	16	0	4	20	12	16	12	8	8	8	20	8	8	12	8	12	8	16	8
6.175	odor on	12	10	24	12	0	4	24	8	8	20	12	15	8	8	8	12	4	12	16	12	4	16	20	8	12	16	8	16	8	20	0	4	20	16	24	20	16	0	12	28	16	12	12	16	24	12	12	8
6.2	odor on	12	10	16	8	8	8	12	4	4	12	24	10	4	16	16	4	12	12	20	12	4	16	20	4	28	12	8	20	4	16	4	4	24	20	20	16	8	0	12	28	20	12	20	24	24	16	8	8
6.225	odor on	16	20	12	8	12	12	12	16	4	8	20	10	0	16	12	0	16	20	16	16	8	24	16	4	28	12	8	24	8	16	12	4	12	12	12	20	16	4	4	20	20	4	20	28	16	20	12	12
6.25	odor on	16	20	16	12	8	12	24	20	4	12	20	5	0	12	8	8	16	20	16	16	12	24	16	8	12	16	16	8	12	8	24	4	4	12	16	20	20	8	4	12	24	12	12	24	12	24	12	16
6.275	odor on	20	20	24	12	4	16	16	20	4	12	20	0	0	12	16	8	16	16	16	12	4	24	16	4	12	12	16	8	12	8	28	4	8	20	20	16	16	12	8	12	20	12	12	24	8	20	8	24
6.3	odor on	20	17.5	24	12	4	20	8	12	0	16	8	5	4	20	16	8	12	16	12	20	0	28	20	4	28	16	8	20	8	12	16	8	20	16	16	16	12	8	12	16	20	0	16	32	12	28	16	20
6.325	odor on	12	15	24	16	8	20	8	16	8	12	12	10	8	16	12	12	8	12	20	20	0	20	20	4	24	24	4	16	12	20	16	8	28	24	20	16	4	12	20	24	16	4	20	24	8	24	16	20
6.35	odor on	12	15	28	12	8	12	20	24	12	16	20	5	8	8	8	12	12	8	12	16	4	24	20	4	20	28	4	8	12	12	16	0	12	28	20	8	4	24	24	24	16	12	28	20	8	16	12	16
6.375	odor on	20	12.5	28	12	8	8	32	8	8	16	16	0	8	12	8	12	16	8	4	20	4	16	28	8	28	24	12	16	4	8	16	4	12	20	12	8	12	16	20	16	28	16	24	24	20	16	8	16
6.4	odor on	20	10	24	20	8	16	20	16	8	8	16	0	8	16	12	12	24	12	16	16	4	4	20	4	24	20	16	20	4	16	24	8	20	16	16	12	16	12	24	20	16	8	16	24	20	8	4	16
6.425	odor on	20	15	20	8	12	20	12	16	4	4	16	15	4	20	16	16	16	12	12	8	4	24	16	4	20	20	16	24	8	20	32	4	24	16	20	12	16	16	20	12	16	4	12	20	12	8	4	16
6.45	odor on	12	22.5	28	12	12	12	8	12	0	8	24	20	8	16	20	12	12	20	0	16	8	28	16	4	16	28	8	20	12	16	28	4	20	28	24	20	16	16	20	4	24	8	8	20	16	12	4	12
6.475	odor on	16	15	32	16	8	8	4	20	4	12	20	10	12	4	8	12	16	20	8	16	8	8	16	8	12	24	8	12	12	12	20	4	8	28	24	20	8	12	16	24	20	8	16	16	12	16	8	20
6.5	odor on	20	10	24	12	8	12	12	20	8	16	16	5	12	8	16	20	8	16	12	8	4	12	24	16	12	12	12	8	12	12	16	4	16	12	16	16	16	8	16	24	16	4	12	24	16	16	8	24
6.525	odor on	8	15	20	8	8	12	28	24	8	20	20	5	16	16	28	24	8	16	12	20	4	16	16	8	8	12	8	12	12	20	12	4	12	4	4	8	12	8	20	12	20	0	12	28	24	12	12	8
6.55		16	15	28	4	8	12	20	20	4	8	20	25	16	20	24	24	12	20	12	16	8	16	20	4	12	8	8	12	8	16	16	0	12	12	16	16	12	4	12	20	20	4	24	20	12	12	20	8
6.575		24	10	28	4	12	12	20	16	4	8	16	30	20	20	24	16	12	20	8	20	8	32	20	8	24	12	8	12	8	16	16	4	20	24	20	16	20	0	4	20	12	8	24	20	8	12	16	8
6.6		16	12.5	28	12	20	12	24	20	8	24	20	15	16	20	24	20	8	12	12	24	4	20	4	12	16	16	4	20	4	20	20	12	20	24	12	8	16	4	8	16	12	4	16	20	24	8	4	24
6.625		8	15	20	16	16	16	12	16	4	16	20	20	4	12	16	20	4	8	16	4	4	16	4	12	12	16	16	12	8	8	24	8	16	20	16	24	20	8	20	16	12	4	12	20	32	12	12	28
6.65		12	7.5	16	4	4	24	16	8	4	8	16	15	8	16	8	12	8	4	12	4	4	16	12	16	8	16	32	12	16	4	20	4	16	12	12	28	28	4	12	12	12	12	16	12	16	12	12	12
6.675		20	5	24	4	8	20	12	12	8	12	20	10	8	16	16	12	16	4	8	8	4	20	8	12	4	16	16	16	12	8	12	4	20	16	8	12	24	0	20	8	20	8	12	8	12	8	8	16
6.7		24	5	24	8	8	8	8	12	4	4	16	15	4	4	16	12	8	8	4	20	8	28	0	8	12	8	8	8	4	8	12	0	20	12	8	16	8	8	20	4	16	0	12	16	16	4	8	12
6.725		20	5	24	4	4	0	8	12	0	8	12	15	8	4	8	12	0	12	0	20	8	20	0	16	8	4	12	4	0	8	8	0	16	0	12	24	0	20	8	4	16	4	16	16	16	8	8	12
6.75		16	5	20	4	4	8	12	8	0	8	12	10	4	8	12	8	4	20	0	4	4	16	4	20	4	4	16	8	0	8	0	4	8	16	16	12	4	16	20	16	16	4	20	16	12	16	12	16
6.775		16	5	20	8	0	20	16	0	4	8	16	0	4	4	20	8	4	16	0	4	4	20	4	20	8	8	16	8	12	16	4	8	8	16	12	4	8	12	16	12	8	0	24	16	16	16	8	8
6.8		16	10	20	8	0	20	8	0	8	12	16	0	4	4	16	12	4	16	8	12	0	12	0	8	4	16	4	8	12	16	12	4	16	4	20	8	8	8	12	8	12	0	20	12	12	12	8	8
6.825		12	12.5	16	20	0	8	0	0	8	12	12	0	4	4	8	8	8	12	8	12	0	0	0	16	8	12	4	12	4	4	8	0	16	12	24	4	8	8	8	8	8	0	16	12	12	12	8	4
6.85		12	5	24	16	4	0	0	4	4	12	16	0	4	4	8	4	4	8	0	12	8	4	8	20	8	16	8	12	8	8	8	4	20	12	20	4	8	12	0	0	4	0	24	12	20	12	8	4
6.875		12	2.5	16	4	4	8	4	8	4	12	20	5	8	12	4	12	0	16	4	8	12	4	16	4	4	12	12	4	4	4	8	4	12	20	12	4	8	4	4	12	8	0	16	12	16	8	4	8
6.9		12	2.5	12	8	4	12	4	8	4	8	16	15	12	12	12	12	8	12	4	4	4	12	12	8	4	4	16	8	4	4	4	0	8	20	12	8	12	8	4	16	12	0	20	12	24	8	0	8
6.925		16	5	16	12	12	12	4	8	0	4	12	10	4	16	16	8	12	4	8	4	8	20	4	12	4	8	12	12	4	8	8	4	12	8	16	8	16	12	0	12	12	0	20	8	24	8	4	4
6.95		20	12.5	16	8	12	12	4	12	4	8	4	5	0	20	12	8	8	0	12	0	8	16	8	8	8	4	8	4	0	8	8	4	4	12	12	0	8	4	12	12	4	0	8	8	16	4	4	4
6.975		28	7.5	20	0	8	4	0	8	4	12	4	10	8	16	12	12	12	4	4	12	4	8	8	4	4	12	12	8	8	8	12	0	8	12	12	4	12	4	12	12	4	4	12	12	16	8	8	8
7		24	0	16	8	4	4	4	0	0	4	4	10	12	16	12	8	12	12	4	16	8	4	0	4	4	16	12	8	8	8	12	0	12	12	12	8	16	8	4	16	8	4	8	4	12	12	12	4
7.025		16	5	16	12	0	16	4	4	0	0	8	15	8	12	12	4	8	12	4	8	4	12	8	4	4	8	12	0	0	16	4	4	12	16	16	16	4	4	8	16	4	4	8	12	8	4	12	4
7.05		12	5	16	4	4	12	0	8	4	4	8	10	4	12	4	16	8	4	4	8	0	12	12	4	12	8	8	4	4	16	8	8	16	12	20	16	4	8	8	16	4	4	12	16	8	0	12	4
7.075		12	5	12	0	8	0	0	4	4	4	4	5	12	16	12	16	20	8	12	16	0	12	4	12	12	12	8	12	8	12	12	8	12	4	16	8	8	12	8	16	8	4	12	8	12	8	12	0
7.1		20	5	16	4	4	8	0	0	0	4	4	5	16	8	20	8	16	8	8	12	4	8	8	12	0	12	12	12	4	12	16	4	8	0	20	4	8	12	8	8	4	8	16	16	16	8	8	0
7.125		20	2.5	20	8	0	12	0	4	8	4	0	0	8	0	8	16	0	0	8	0	4	4	8	8	8	12	12	8	0	16	16	8	8	4	24	0	8	16	8	8	8	4	12	20	12	4	4	0
7.15		12	5	12	8	8	8	0	8	16	0	4	15	8	12	4	20	8	0	12	0	0	12	0	4	12	8	12	16	0	16	4	8	8	4	16	0	4	16	8	12	8	0	8	12	20	16	4	8
7.175		4	7.5	16	4	12	8	0	4	8	4	16	20	8	12	12	8	16	4	8	0	4	20	4	0	12	12	8	20	4	8	0	4	12	8	24	0	4	12	8	8	8	4	12	8	20	20	8	8
7.2		4	5	24	8	8	12	0	8	0	4	12	5	12	0	20	0	12	8	4	4	12	24	8	8	8	20	12	12	12	8	0	4	16	16	24	4	8	8	4	8	16	8	12	4	12	16	8	4
7.225		16	5	16	12	8	12	0	8	0	4	8	10	12	0	28	0	4	12	4	8	8	20	4	24	0	16	12	16	8	4	4	0	16	12	12	4	8	8	4	8	12	4	20	8	12	12	8	8
7.25		12	15	8	16	12	4	4	0	0	12	16	10	4	4	20	0	0	8	12	16	0	12	12	24	8	20	8	16	0	4	8	0	12	4	24	4	12	4	8	16	4	4	16	8	12	12	12	4
7.275		12	10	20	12	16	0	4	12	4	12	20	5	4	12	12	0	4	4	12	12	8	8	20	12	16	12	8	8	4	4	4	0	12	0	24	4	8	8	4	12	4	8	12	0	20	16	4	4
7.3		20	0	24	8	16	4	8	12	4	4	24	15	4	12	8	8	8	4	8	0	8	12	16	8	8	4	4	4	4	4	0	8	20	0	16	4	0	8	4	4	12	4	12	8	12	12	0	8
7.325		16	7.5	12	16	12	8	12	8	0	0	20	10	4	8	12	12	12	0	4	0	4	16	12	16	4	4	8	12	8	12	4	12	16	4	28	8	0	12	12	12	12	0	12	12	12	8	12	4
7.35		12	7.5	12	16	4	8	4	12	0	12	8	10	8	12	12	8	8	0	4	0	8	12	8	12	8	8	8	16	12	12	8	4	12	16	28	4	12	12	8	20	8	8	16	8	20	12	16	0
7.375		12	0	24	8	4	4	0	4	0	16	4	20	8	12	12	8	8	4	8	4	4	12	8	16	8	12	4	12	4	12	8	4	16	20	28	4	16	4	0	16	4	8	12	12	16	8	8	4
7.4		16	2.5	32	8	4	4	12	4	4	12	8	15	4	8	16	8	16	4	4	8	0	16	4	24	12	20	4	12	4	8	8	12	16	8	24	16	12	4	4	12	4	4	8	12	16	12	12	8
7.425		16	7.5	24	16	0	4	12	12	4	16	12	10	4	16	8	4	12	4	4	8	0	8	4	8	16	12	8	8	4	8	12	8	16	0	12	20	12	4	4	8	4	4	8	12	24	20	8	4
7.45		24	10	12	8	4	4	4	8	4	8	12	15	16	12	8	8	8	8	16	4	4	0	0	8	8	0	8	12	4	16	8	4	12	12	16	12	20	4	0	8	0	0	16	8	28	12	4	0
7.475		28	5	8	0	8	12	8	8	12	12	8	20	24	4	8	8	4	8	12	8	8	12	8	12	8	4	4	12	12	16	4	8	12	16	20	4	20	4	0	12	8	0	12	8	16	8	12	0
7.5		20	5	20	4	4	16	8	16	8	12	12	10	12	4	12	8	4	8	0	8	4	16	12	12	8	4	12	8	8	12	8	12	16	8	20	0	16	8	0	16	16	0	16	20	12	16	12	0
7.525		16	12.5	24	8	4	8	12	8	4	4	8	5	0	0	12	12	8	4	8	0	4	8	8	8	0	0	8	12	4	4	4	16	20	12	20	4	12	12	4	24	8	0	16	12	12	16	4	0
7.55		20	12.5	20	8	12	4	8	4	8	8	4	5	8	4	12	4	4	8	8	0	4	8	4	8	12	4	8	12	4	4	0	12	8	12	16	8	4	16	16	20	8	0	12	4	16	8	4	0
7.575		16	10	24	12	12	8	8	8	4	16	16	0	8	16	12	4	12	12	4	0	0	8	8	12	16	8	8	4	8	12	8	16	12	4	20	8	4	12	12	12	8	0	24	8	16	12	12	4
7.6		16	12.5	20	12	8	4	16	4	0	20	24	15	8	20	8	12	16	16	4	0	0	12	8	16	8	4	0	4	8	8	12	12	16	4	20	8	4	16	8	12	8	0	16	8	20	8	8	4
7.625		20	12.5	16	4	8	4	12	0	0	12	20	20	8	8	12	8	4	16	0	4	4	16	4	16	4	4	4	12	4	12	8	0	8	8	12	4	12	12	12	12	16	4	8	8	24	8	0	0
7.65		16	12.5	20	8	8	4	4	4	0	8	12	5	12	12	12	12	0	8	0	4	8	8	4	12	8	4	12	8	12	16	4	0	12	8	16	4	16	4	8	8	16	4	8	16	24	16	0	0
7.675		8	12.5	16	12	8	0	0	8	0	4	4	10	12	16	8	24	4	8	4	4	4	8	0	12	8	4	16	4	8	4	8	4	20	8	16	12	16	4	4	16	8	0	4	12	28	8	4	8
7.7		12	10	20	12	16	8	0	8	4	4	12	15	4	8	8	24	8	12	8	8	0	16	4	8	4	8	8	8	12	16	16	8	20	12	8	12	12	4	4	20	0	4	16	8	16	8	8	12
7.725		16	15	24	12	16	8	0	4	8	4	16	10	8	8	4	12	12	12	4	8	0	16	4	4	8	8	12	12	16	16	16	4	12	8	12	8	8	4	12	12	0	4	20	8	8	8	4	8
7.75		16	12.5	16	4	8	0	12	0	4	0	4	10	8	4	0	8	12	4	4	8	0	12	4	8	4	8	16	12	16	8	20	4	16	4	12	8	16	0	12	8	4	8	16	4	8	4	0	8
7.775		16	5	16	8	8	0	16	4	4	4	8	10	0	0	8	8	16	12	8	16	0	12	12	8	8	12	4	8	16	16	12	8	16	4	20	4	20	4	8	4	8	8	16	4	4	8	8	16
7.8		12	2.5	16	20	4	0	4	4	4	8	8	5	0	4	8	4	16	16	4	12	4	8	16	8	12	12	12	4	8	8	12	8	12	0	28	4	12	8	4	12	4	4	20	0	12	16	8	16
7.825		16	2.5	16	16	4	0	12	0	8	12	16	0	0	8	8	12	8	4	4	8	12	12	12	4	8	16	20	4	8	12	16	8	20	4	12	4	16	8	8	20	0	12	24	8	16	12	8	4
7.85		20	2.5	16	4	4	4	16	4	8	8	20	5	8	12	16	8	12	0	8	12	8	16	12	0	4	12	12	4	8	12	4	4	12	12	12	8	20	12	12	20	4	8	12	8	12	4	8	4
7.875		20	2.5	20	0	8	8	4	12	4	8	16	10	12	12	16	8	8	8	8	8	4	8	8	8	0	12	12	0	4	4	0	0	8	12	20	16	8	8	4	24	4	4	4	8	20	8	8	4
7.9		16	7.5	16	4	8	16	0	8	4	12	16	10	12	8	12	16	4	16	4	12	4	12	8	12	8	16	12	0	8	8	4	4	12	4	20	8	4	4	0	20	0	4	12	12	16	8	16	0
7.925		16	10	16	8	4	12	8	0	0	4	4	5	20	8	12	8	8	12	0	8	4	12	16	16	12	4	12	8	12	12	4	8	12	12	28	4	4	4	4	12	0	0	16	12	20	4	12	4
7.95		20	7.5	20	4	12	4	20	4	0	8	8	0	24	4	16	12	4	16	4	4	12	4	8	12	8	4	8	12	8	16	8	12	20	28	20	8	8	12	4	8	0	0	16	12	24	8	8	8
7.975		20	2.5	20	4	12	8	20	4	0	8	8	10	16	4	12	16	8	16	8	12	8	4	8	8	4	4	4	4	4	12	12	8	20	20	12	4	8	20	0	12	8	0	12	4	12	20	8	4
8		16	5	20	4	12	4	8	8	8	0	8	10	12	12	4	8	8	8	12	12	0	8	8	8	0	8	4	4	4	8	8	8	12	8	24	4	8	8	8	12	12	8	4	4	12	20	8	4
8.025		24	10	16	4	12	4	0	8	8	4	24	10	20	12	8	8	8	4	16	16	12	16	0	8	0	8	0	8	8	4	4	8	16	12	20	8	8	12	8	8	8	8	4	16	20	16	8	4
8.05		16	10	24	12	16	4	0	0	0	4	16	10	16	8	8	12	8	4	8	24	16	12	4	20	4	8	4	4	8	0	4	4	20	16	4	4	4	12	0	8	8	0	8	12	24	16	16	4
8.075		12	10	28	12	12	4	0	4	4	8	4	5	8	12	4	16	12	8	12	16	8	12	8	20	8	12	16	4	4	8	12	8	16	12	12	4	8	4	0	8	8	0	4	8	16	16	12	8
8.1		16	10	20	8	8	4	0	4	8	16	8	10	4	8	8	12	16	4	12	12	4	16	8	16	8	8	16	12	4	12	16	8	20	4	24	8	8	12	4	12	16	0	12	12	8	16	4	4
8.125		12	5	16	8	12	0	0	8	4	8	12	10	12	4	8	4	12	0	0	12	8	4	8	8	8	4	4	12	4	16	12	8	20	0	20	8	12	8	8	12	12	0	12	16	12	16	8	4
8.15		24	2.5	24	12	8	8	4	12	4	8	12	5	12	12	12	12	8	0	0	4	12	4	8	4	8	0	4	4	8	12	8	4	8	12	16	12	12	0	8	8	0	0	0	16	16	12	4	8
8.175		20	5	28	8	4	8	8	8	8	8	12	5	8	16	12	16	8	8	16	4	8	8	4	20	8	0	8	12	20	8	8	0	0	16	12	12	12	0	16	12	4	4	4	8	16	4	8	8
8.2		16	5	16	4	8	4	4	8	8	0	16	10	20	8	8	4	16	12	24	4	8	8	4	20	8	0	12	16	16	12	4	4	4	8	12	4	12	4	12	12	4	8	8	4	12	0	12	8
8.225		20	5	16	12	12	4	4	12	4	8	12	10	16	0	12	8	8	12	12	0	4	12	4	4	8	4	16	16	4	8	4	4	8	12	16	4	4	8	12	12	12	4	8	0	12	16	4	12
8.25		16	10	16	20	4	12	8	16	4	8	4	5	12	4	12	16	0	8	8	0	8	16	8	4	20	4	12	20	8	8	4	0	4	16	20	8	4	8	16	12	20	4	4	4	12	20	4	8
8.275		16	10	16	12	4	16	4	16	8	8	0	5	12	8	12	12	0	4	4	4	8	16	12	16	20	0	4	12	8	8	0	0	0	16	28	12	8	12	8	4	12	4	4	4	16	12	8	0
8.3		20	7.5	12	16	4	12	8	8	4	8	4	5	16	12	8	8	0	8	4	8	0	12	8	24	8	0	4	8	4	16	0	0	4	20	16	16	8	12	8	8	8	0	4	12	16	16	12	0
8.325		16	10	20	20	8	8	12	12	0	4	8	0	12	16	4	12	4	4	12	8	0	12	8	12	4	4	16	4	12	12	0	4	8	16	12	8	4	12	12	16	4	0	8	12	16	8	12	8
8.35		12	12.5	24	12	8	12	12	12	4	8	16	0	0	8	8	12	8	4	16	8	4	16	12	0	4	4	12	0	16	16	0	4	8	16	24	4	4	16	16	20	8	4	12	8	20	8	4	8
8.375		16	12.5	16	12	4	16	16	0	4	4	12	5	12	4	4	4	12	8	8	8	12	16	8	8	12	0	8	8	8	24	0	0	8	12	20	8	8	16	12	24	8	8	12	12	16	8	8	0
8.4		12	12.5	16	8	8	4	12	12	0	4	8	10	16	12	8	0	16	16	4	4	12	12	4	8	12	0	16	16	4	16	4	0	12	4	12	4	12	8	4	12	4	4	12	8	24	4	12	4
8.425		16	10	16	0	4	8	12	12	0	8	8	15	16	12	20	0	12	16	8	4	8	12	4	12	12	4	8	8	12	16	8	0	12	16	24	0	8	4	0	4	12	8	8	8	24	12	8	4
8.45		12	10	12	0	0	12	8	8	0	8	8	15	16	24	24	4	4	16	4	4	8	20	4	12	16	4	4	0	8	12	8	0	12	20	20	8	8	4	4	8	8	8	16	16	12	8	12	0
8.475		4	10	16	0	8	12	0	12	8	8	12	10	8	24	20	4	0	16	4	4	16	24	4	8	16	4	8	4	0	12	8	0	12	12	20	20	8	8	4	12	12	0	16	12	12	0	12	4
8.5		8	5	16	4	8	12	4	16	8	12	8	10	8	16	16	12	8	8	12	16	16	12	4	12	12	4	12	12	8	16	8	0	4	16	28	16	8	12	8	12	16	8	4	4	12	4	12	4
8.525		16	5	4	12	12	4	8	16	8	12	24	5	4	16	12	20	8	12	8	16	8	4	8	8	8	4	12	16	8	12	4	4	0	12	16	12	12	12	16	8	8	8	12	4	12	4	12	0
8.55		20	7.5	12	8	16	4	8	8	16	8	20	5	8	12	16	12	4	12	0	4	12	8	16	8	4	4	12	16	0	16	4	4	12	4	12	12	4	12	12	8	4	0	12	12	8	4	16	4
8.575		12	7.5	24	4	4	12	16	4	8	12	4	10	12	8	20	4	8	12	0	0	8	8	12	4	4	16	16	20	0	20	12	4	16	12	16	8	0	12	8	4	8	0	4	20	4	8	16	4
8.6		4	5	24	12	0	8	24	4	12	8	4	10	12	4	16	0	4	12	0	8	4	4	12	4	12	20	12	16	0	8	12	4	20	12	8	16	8	16	8	16	12	0	12	12	12	12	8	0
8.625		0	10	20	8	4	8	12	4	16	4	8	5	12	4	12	12	12	12	4	8	4	0	12	12	8	8	8	12	4	8	4	0	20	4	16	12	8	12	8	16	4	4	12	8	16	8	8	4
8.65		4	7.5	12	12	4	8	0	8	8	8	16	10	12	12	16	16	12	20	8	4	0	8	8	12	8	8	12	20	4	12	8	0	4	12	28	8	0	8	4	12	4	4	8	12	20	4	12	8
8.675		12	2.5	16	16	0	0	4	8	8	8	8	15	24	12	16	4	4	12	4	8	4	12	8	4	24	8	12	12	4	16	16	0	4	12	16	8	8	12	0	16	12	12	4	16	28	12	8	8
8.7		16	2.5	24	8	4	8	4	4	4	4	4	5	16	8	8	12	8	0	8	12	8	12	8	4	16	8	16	0	4	8	12	4	8	4	16	0	12	12	0	16	20	12	4	16	24	12	12	4
8.725		16	5	16	16	4	8	8	4	0	8	8	10	0	8	8	12	12	4	8	8	4	8	12	8	4	8	20	4	4	4	8	8	8	4	20	4	12	4	4	16	20	0	4	16	16	8	12	0
8.75		12	7.5	16	20	8	4	8	0	8	8	12	20	8	8	8	4	8	4	0	12	0	16	12	8	12	16	12	8	4	4	8	4	12	0	12	4	12	8	12	16	12	0	4	4	16	4	0	0
8.775		16	10	16	16	12	8	0	0	8	4	12	15	20	8	4	8	0	0	4	12	8	20	16	20	8	12	8	4	8	4	12	8	12	8	12	8	12	12	12	12	8	0	8	8	8	0	4	8
8.8		20	10	12	16	4	12	0	4	4	8	12	20	12	4	4	4	4	4	12	0	8	16	12	16	8	0	8	4	12	16	16	8	12	8	20	8	16	8	4	4	8	8	12	8	12	4	4	8
8.825		12	2.5	16	12	0	16	4	4	8	8	8	20	0	4	12	8	12	8	16	8	0	16	12	8	16	8	12	8	4	20	12	4	12	4	20	4	16	12	4	16	8	8	12	0	16	8	0	4
8.85		12	5	20	8	0	12	4	0	4	4	8	5	4	0	8	12	8	4	12	8	0	8	8	16	8	16	16	4	0	8	4	4	16	12	16	4	12	12	8	12	12	8	12	12	16	8	4	4
8.875		12	7.5	12	4	8	12	4	4	0	4	12	0	4	0	4	4	16	4	4	0	0	12	0	12	0	8	8	4	4	4	0	0	16	12	8	8	8	12	8	12	12	12	12	16	20	8	8	0
8.9		12	7.5	4	0	8	16	12	8	0	8	8	15	0	4	4	8	16	4	0	4	0	16	12	4	0	4	4	8	4	20	0	0	4	8	0	16	4	12	8	16	16	8	12	8	12	12	4	4
8.925		8	10	16	0	0	8	16	4	0	4	16	30	8	8	0	16	8	4	0	4	0	12	16	4	8	8	8	4	0	16	8	0	4	4	12	12	0	8	8	8	12	8	16	12	8	16	8	8
8.95		8	5	16	0	0	0	16	0	8	8	16	15	12	12	0	16	16	8	12	0	8	16	4	8	12	8	8	12	0	16	12	0	16	8	28	12	8	8	8	8	12	16	12	12	8	12	12	4
8.975		16	7.5	20	0	8	8	16	4	12	12	12	15	8	12	0	20	12	4	12	0	12	20	4	4	8	12	8	12	0	16	8	0	20	12	20	12	12	4	8	16	16	12	8	8	16	8	12	0
9		20	7.5	24	0	8	8	12	4	4	4	16	20	12	16	4	16	4	4	4	0	4	12	12	8	12	12	12	4	8	8	8	0	24	8	8	8	16	4	8	16	12	0	12	8	20	8	8	0
9.025		16	2.5	12	4	4	0	8	4	4	0	8	10	8	12	12	8	0	8	8	8	4	12	12	12	8	12	8	4	16	20	12	0	20	4	12	12	20	4	4	4	8	4	12	8	20	8	0	4
9.05		20	7.5	20	4	4	12	12	4	4	16	8	5	4	0	8	8	4	8	4	8	8	12	8	16	0	12	12	8	8	20	12	0	8	8	16	16	12	8	0	8	8	8	12	16	24	12	4	4
9.075		20	12.5	28	0	0	16	8	0	8	16	12	0	8	8	8	8	8	4	8	4	4	4	8	20	4	4	16	12	0	8	8	4	8	12	16	12	8	8	4	12	4	4	20	20	20	8	12	0
9.1		12	7.5	20	4	4	12	0	4	12	0	8	5	12	12	12	4	8	4	8	8	0	8	12	12	12	0	12	4	8	0	4	4	8	16	16	8	8	4	4	8	0	4	20	16	12	8	8	8
9.125		16	0	20	12	8	16	8	8	8	4	8	15	12	4	8	0	4	8	4	8	0	8	16	4	12	0	16	12	16	4	4	0	12	20	12	8	16	4	4	8	4	4	8	16	12	12	0	12
9.15		20	7.5	24	8	8	8	8	8	4	8	12	10	12	4	12	4	8	4	12	4	4	12	12	4	8	4	16	16	12	4	8	0	20	12	8	8	16	4	8	16	4	0	8	8	16	8	8	4
9.175		24	10	24	8	4	4	8	4	4	8	8	10	16	16	16	4	8	4	8	8	8	20	4	4	8	8	12	4	12	0	8	0	12	8	8	8	8	4	4	16	4	0	12	12	8	12	16	8
9.2		12	5	20	12	4	4	12	4	4	4	8	10	16	12	12	8	0	8	4	16	8	16	8	4	8	4	12	4	16	12	8	0	12	8	16	12	8	4	0	12	8	0	8	12	12	12	8	8
9.225		8	12.5	16	12	12	4	4	4	12	4	8	0	16	0	8	8	4	16	4	16	8	12	8	8	4	4	16	8	8	20	8	0	12	12	20	20	16	8	0	12	12	8	8	4	20	8	4	4
9.25		12	17.5	12	12	8	12	8	8	12	4	16	0	16	0	8	8	8	12	4	12	12	16	8	16	4	8	12	12	16	12	4	4	12	12	20	20	16	8	8	16	8	12	8	12	12	8	12	4
9.275		12	17.5	12	8	0	12	8	8	4	8	20	5	12	0	8	8	4	8	4	16	8	12	8	12	8	8	8	12	20	8	0	4	12	8	20	20	12	12	12	20	4	8	8	12	8	8	8	8
9.3		12	17.5	16	12	4	12	8	8	4	8	20	10	12	4	8	0	8	8	8	12	0	4	4	12	12	4	4	12	12	8	0	4	8	4	12	12	8	8	8	8	4	12	12	12	12	8	0	8
9.325		16	10	16	16	8	8	20	8	8	0	24	10	20	12	8	8	12	12	12	4	0	16	8	8	16	12	12	12	8	20	0	4	12	8	4	4	8	4	12	8	0	12	16	16	20	8	8	12
9.35		20	5	24	8	4	4	16	4	12	0	16	10	16	12	8	12	4	12	8	8	0	20	8	8	16	20	12	8	8	16	0	4	20	16	4	8	8	8	8	20	4	8	16	12	24	8	12	12
9.375		16	5	24	4	8	0	12	12	4	0	20	15	8	16	8	12	4	12	8	12	0	24	8	8	20	8	4	4	8	4	8	4	20	12	16	8	8	8	4	12	12	4	8	16	20	8	8	8
9.4		12	5	20	4	16	4	8	20	8	8	16	15	16	12	16	8	0	12	8	12	4	20	8	4	20	4	12	8	4	4	12	0	8	8	16	12	20	4	12	4	20	4	8	16	8	8	12	12
9.425		20	2.5	20	4	8	4	4	16	12	12	12	5	12	4	20	0	4	16	8	16	4	8	8	8	8	4	12	8	8	16	4	0	12	16	12	12	16	0	16	8	16	8	16	4	4	4	8	8
9.45		24	5	16	12	4	4	4	12	16	4	20	0	12	4	12	4	4	20	8	8	0	12	12	4	8	4	12	4	8	20	8	4	12	12	16	8	8	4	12	20	8	8	24	4	12	4	4	8
9.475		16	7.5	16	12	4	4	0	12	12	4	12	0	16	0	8	16	4	16	8	12	4	8	12	4	16	16	8	4	4	4	12	4	8	8	20	4	4	4	8	16	4	4	16	8	12	12	4	4
9.5		16	5	16	8	8	0	4	8	0	12	4	5	12	4	16	16	4	24	8	16	4	12	8	4	16	20	8	4	4	8	16	0	16	8	20	4	0	0	4	8	8	0	12	12	12	12	0	4
9.525		16	5	12	12	8	0	4	4	0	12	12	5	8	12	20	8	4	12	4	12	4	16	16	4	8	8	12	8	8	8	12	0	16	0	20	12	0	12	4	12	12	16	20	8	16	4	8	4
9.55		4	5	12	8	0	4	4	0	4	12	8	10	8	12	12	4	8	8	0	8	4	4	16	4	0	0	12	4	8	8	4	0	12	4	20	12	0	16	8	8	4	16	8	8	24	12	8	4
9.575		20	7.5	24	0	0	8	12	0	8	12	4	15	24	8	4	4	4	8	4	4	0	8	4	4	8	4	20	4	4	12	4	4	16	4	12	8	12	12	8	12	0	4	8	12	16	20	0	8
9.6		28	10	24	4	8	12	8	4	4	4	8	10	20	16	4	12	8	0	4	4	0	12	0	16	8	16	20	4	12	12	8	12	20	8	20	12	20	8	4	12	8	8	12	8	4	16	8	8
9.625		16	10	24	4	12	16	4	4	0	4	4	10	8	16	8	12	8	4	0	8	0	12	0	12	0	24	12	0	16	8	8	12	20	16	36	16	16	0	4	12	12	8	8	8	16	12	16	4
9.65		12	7.5	20	0	4	12	12	0	4	8	12	10	12	8	8	12	8	8	0	12	0	8	4	8	4	16	8	4	4	8	4	4	12	20	24	12	12	4	4	20	4	4	4	8	16	12	8	0
9.675		12	7.5	20	4	0	12	12	4	4	8	12	10	8	8	8	12	12	4	4	12	4	16	4	16	12	12	12	12	8	16	8	8	8	16	8	4	8	8	8	20	4	0	4	12	16	16	0	8
9.7		16	7.5	24	4	12	8	12	4	0	8	0	5	16	8	8	8	8	16	4	8	12	16	8	16	8	8	16	12	12	20	4	12	8	4	16	8	12	8	16	20	12	4	8	12	16	8	12	12
9.725		16	5	20	0	12	0	8	4	0	8	4	0	16	4	12	8	4	16	0	0	12	4	12	20	4	4	20	12	4	12	0	4	8	12	20	8	16	4	8	16	12	8	4	12	12	4	16	8
9.75		20	7.5	24	4	4	0	8	8	0	8	4	10	4	4	12	16	8	8	0	8	12	8	8	16	4	8	12	12	12	4	0	4	16	12	16	4	8	8	0	8	8	8	12	12	16	4	8	4
9.775		20	10	20	4	4	0	8	4	4	4	4	15	0	4	12	16	12	8	0	8	8	8	8	8	4	8	8	8	20	8	12	4	12	4	12	4	0	4	8	8	12	4	16	12	16	12	8	8
9.8		12	15	16	0	4	4	0	8	8	12	4	20	4	0	12	8	4	8	0	4	4	8	12	12	4	12	16	8	16	4	12	0	12	8	12	8	8	0	8	4	8	4	12	20	16	16	8	8
9.825		12	12.5	12	4	12	8	4	8	4	12	4	20	12	4	8	12	8	12	0	8	4	8	16	12	4	8	12	12	8	0	4	4	12	4	20	12	12	4	4	4	0	8	16	12	16	12	8	0
9.85		12	7.5	12	8	12	4	4	12	4	4	8	15	12	12	12	12	8	8	4	12	4	16	8	8	8	0	4	4	4	4	4	4	12	4	20	8	12	4	8	8	4	8	8	8	20	12	4	8
9.875		4	5	12	8	4	0	4	20	8	12	4	20	12	16	12	4	4	4	4	8	12	24	16	16	16	12	8	4	4	20	12	8	8	8	24	4	12	4	12	12	4	4	4	16	12	16	4	8
9.9		8	5	4	8	0	0	8	12	8	8	8	10	12	16	12	4	8	4	0	4	20	24	16	24	12	16	12	4	8	20	12	8	12	12	20	0	8	4	8	12	4	4	16	16	0	12	8	0
9.925		20	12.5	4	8	8	8	4	4	4	4	12	5	4	12	8	12	4	12	8	8	12	20	0	12	8	12	16	4	12	12	12	4	12	16	20	4	4	4	4	20	4	12	16	16	4	8	4	0
9.95		12	12.5	16	12	12	12	8	4	4	4	16	5	12	8	0	20	0	16	8	16	4	20	8	12	12	16	16	8	8	12	12	4	8	8	20	12	4	8	8	24	4	8	8	8	20	12	0	0
pb1a, firing rate (Hz)
exposure cond.	solvent
n		9									11											10										10										10
stimulus, 2-butanone (log[conc.])		solvent (0)	solvent (0)	solvent (0)	solvent (0)	solvent (0)	solvent (0)	solvent (0)	solvent (0)	solvent (0)	-10	-10	-10	-10	-10	-10	-10	-10	-10	-10	-10	-9	-9	-9	-9	-9	-9	-9	-9	-9	-9	-8	-8	-8	-8	-8	-8	-8	-8	-8	-8	-7	-7	-7	-7	-7	-7	-7	-7
time (s)
1.025		12	0	28	20	4	32	20	4	16	12	4	20	8	6.66667	12	4	16	8	20	12	4	4	16	8	16	12	12	12	24	20	16	8	16	8	8	16	8	24	24	32	12	8	13.3333	12	20	16	10	20
1.05		20	8	20	4	4	28	28	4	24	16	8	16	12	3.33333	4	4	20	16	28	16	0	8	16	8	8	8	4	16	20	16	16	4	8	8	20	20	8	16	16	24	20	8	13.3333	4	20	8	10	24
1.075		20	16	16	8	0	36	24	8	32	20	8	16	16	0	8	4	20	20	28	24	16	12	12	8	4	8	4	20	20	24	16	12	16	8	20	16	0	20	24	20	20	8	13.3333	4	8	0	15	24
1.1		24	8	24	16	0	32	20	8	24	24	0	12	16	6.66667	16	8	16	12	24	20	20	16	12	8	12	16	12	16	20	32	20	16	12	4	8	8	0	28	24	20	16	12	13.3333	0	12	4	10	24
1.125		20	16	24	16	4	24	16	12	16	16	8	8	12	6.66667	12	12	24	20	16	16	12	8	20	12	12	12	20	12	8	24	20	12	12	4	4	12	4	32	8	20	16	8	20	4	16	4	5	28
1.15		12	20	20	8	8	32	24	12	4	12	8	4	8	0	16	8	24	16	16	16	8	8	12	8	8	16	8	12	16	20	16	12	12	8	0	16	4	28	12	16	12	4	20	4	12	12	5	24
1.175		16	8	24	4	8	28	16	4	16	24	0	4	16	3.33333	20	4	28	8	28	16	8	12	12	8	8	20	8	12	16	16	12	12	12	8	16	16	0	20	12	20	16	16	13.3333	4	12	16	0	20
1.2		20	8	32	8	12	32	12	4	20	20	8	12	12	3.33333	12	0	24	12	28	4	8	4	16	16	12	12	8	20	12	8	20	12	16	12	16	12	0	20	8	20	8	24	26.6667	12	12	12	5	24
1.225		12	12	28	12	12	32	16	8	20	12	8	16	4	3.33333	16	4	16	20	28	12	0	8	20	8	12	8	4	20	24	20	16	8	12	8	8	12	8	20	8	16	12	12	26.6667	8	16	12	15	24
1.25		8	20	24	12	4	36	12	4	28	16	4	20	8	13.3333	12	12	16	16	12	16	4	12	20	8	4	12	4	16	24	24	8	12	12	0	12	12	12	32	8	16	12	4	20	4	12	12	15	28
1.275		8	16	20	12	0	36	12	4	16	12	8	16	8	10	12	12	12	8	12	12	16	12	8	16	8	20	4	24	12	16	8	16	20	12	12	12	8	24	8	24	8	8	13.3333	8	12	12	15	24
1.3		8	8	24	12	4	32	24	8	4	4	4	12	8	6.66667	20	4	24	16	24	20	20	12	8	20	16	20	4	24	12	20	12	8	16	16	12	16	12	16	24	20	16	12	13.3333	12	12	12	5	20
1.325		4	4	24	8	4	28	20	8	16	16	4	12	8	6.66667	12	8	32	24	32	24	16	4	8	12	12	16	12	24	20	24	16	12	4	12	8	12	8	28	24	12	12	12	13.3333	8	16	20	5	28
1.35		4	4	20	4	0	32	16	8	16	20	8	8	16	3.33333	16	8	24	20	28	20	20	4	20	8	8	20	12	20	20	24	12	8	8	12	12	12	12	24	16	16	20	16	20	4	24	20	5	24
1.375		8	12	20	8	8	36	24	4	8	12	4	8	16	13.3333	24	4	20	20	16	8	16	8	16	16	12	24	4	28	24	20	12	0	12	8	20	16	12	20	24	12	16	24	26.6667	4	20	8	10	24
1.4		12	8	16	8	8	20	20	4	20	12	8	8	8	10	24	16	24	16	16	12	8	4	4	12	12	24	12	24	16	20	12	0	8	12	12	20	4	28	20	16	16	16	13.3333	0	20	12	10	24
1.425		12	4	20	0	4	28	12	8	16	20	16	8	8	3.33333	20	20	24	16	16	28	16	8	16	4	8	12	12	20	16	24	12	0	16	12	8	12	4	32	20	20	20	12	6.66667	4	16	16	10	24
1.45		4	4	20	8	8	40	8	8	16	20	12	12	4	6.66667	16	16	20	16	20	20	16	12	20	0	12	12	4	28	16	20	16	0	16	12	20	12	4	36	16	12	16	24	6.66667	8	20	16	15	24
1.475		12	8	20	12	4	40	12	8	20	24	12	20	8	3.33333	12	8	28	16	16	4	12	4	20	8	8	20	8	28	24	24	12	0	8	8	20	16	4	24	12	4	16	20	20	8	20	28	10	16
1.5		20	16	32	4	4	40	20	4	20	20	8	28	8	6.66667	16	12	24	12	12	16	16	8	16	12	4	16	12	20	36	32	8	4	8	4	16	12	4	12	16	16	12	20	20	12	16	24	5	28
1.525		12	12	32	0	4	32	16	4	24	12	4	24	8	10	12	16	20	12	20	24	16	12	16	4	4	16	8	8	20	28	16	4	12	12	12	12	4	16	20	20	8	20	20	8	12	16	0	24
1.55		8	4	28	0	0	28	16	4	16	8	4	12	8	6.66667	8	12	24	16	20	24	12	12	24	8	4	12	4	16	20	20	16	16	16	12	8	8	8	20	16	20	8	8	26.6667	0	12	12	5	16
1.575		12	8	32	4	0	28	16	0	12	16	0	12	8	6.66667	20	8	16	12	8	24	8	12	16	12	12	8	8	20	28	20	8	16	12	4	12	12	12	24	20	20	12	12	26.6667	0	20	8	10	24
1.6		12	12	28	8	0	28	8	8	16	20	4	16	12	6.66667	12	0	16	20	16	20	12	4	12	12	12	8	20	24	24	20	12	4	16	12	16	16	8	20	20	16	12	16	20	12	12	12	5	24
1.625		8	8	24	4	0	28	8	8	20	16	4	12	8	3.33333	4	8	16	20	24	24	8	0	20	20	4	12	16	24	16	16	12	8	16	16	16	16	4	24	8	12	16	12	13.3333	16	12	8	0	16
1.65		8	4	28	0	4	32	16	4	24	16	12	16	20	3.33333	8	12	12	16	16	16	8	12	16	12	4	16	8	20	12	16	12	12	16	8	12	24	4	24	20	20	12	8	13.3333	4	12	8	5	12
1.675		8	4	32	0	4	36	20	4	16	12	16	24	12	6.66667	12	12	20	16	20	20	8	12	16	8	12	16	8	24	24	12	16	8	12	4	8	16	12	20	24	24	12	4	13.3333	8	4	16	15	28
1.7		12	12	24	0	8	28	16	4	12	12	16	16	12	6.66667	8	16	24	12	28	20	4	16	24	16	12	16	8	32	24	24	12	0	4	4	12	8	12	32	12	12	20	4	13.3333	16	8	12	20	28
1.725		20	12	20	4	16	20	12	8	20	12	12	12	16	10	12	16	20	12	20	16	12	20	16	12	16	8	16	24	16	28	16	8	4	4	12	8	8	20	16	16	16	8	20	12	8	12	15	24
1.75		12	12	12	4	8	28	8	12	24	16	4	12	12	6.66667	24	8	20	12	20	20	12	8	8	12	12	8	8	16	24	16	12	12	12	12	12	12	4	8	24	16	8	16	20	8	4	16	10	20
1.775		16	12	20	8	0	28	12	12	24	24	8	20	8	6.66667	16	12	20	12	12	16	4	4	16	12	4	8	8	24	24	20	8	12	12	16	16	20	8	16	24	12	8	28	13.3333	4	16	12	5	16
1.8		12	4	24	16	4	32	20	4	20	16	8	16	4	6.66667	12	16	16	12	16	12	4	0	12	16	8	16	8	24	8	24	16	12	0	12	16	12	8	20	16	4	16	24	26.6667	16	24	16	5	28
1.825		4	0	28	12	8	28	28	4	16	12	8	12	8	0	12	4	20	8	28	16	8	4	12	16	8	20	4	24	16	24	12	8	12	16	16	12	0	32	20	16	12	12	26.6667	24	12	20	0	24
1.85		8	12	24	12	8	20	20	8	32	12	16	16	12	3.33333	8	4	16	12	24	24	12	4	16	8	12	20	4	24	24	20	8	4	12	8	12	16	0	28	24	20	8	12	20	12	20	16	0	28
1.875		12	16	12	16	4	28	4	8	36	16	16	4	12	6.66667	8	12	12	16	24	28	16	4	4	8	8	16	0	28	24	28	16	8	4	4	12	8	4	16	16	16	12	12	20	0	28	16	0	36
1.9		12	12	20	16	4	28	12	12	16	8	8	12	8	3.33333	16	8	12	8	28	24	16	8	12	4	4	0	0	20	28	24	20	12	8	8	8	0	8	28	16	24	8	8	20	8	12	12	10	32
1.925		8	8	28	8	8	28	20	8	16	8	8	16	8	3.33333	28	4	12	12	24	24	12	16	16	4	12	4	4	20	20	20	16	8	12	8	12	8	8	24	28	20	16	4	20	12	8	12	10	24
1.95		8	12	36	8	4	36	16	8	24	8	4	12	12	3.33333	16	8	24	24	20	24	8	20	8	12	12	8	4	32	16	20	20	4	12	8	20	12	4	24	16	16	16	4	26.6667	4	8	12	5	20
1.975		8	16	28	8	0	40	24	12	24	8	4	20	12	3.33333	4	4	28	16	20	28	16	8	4	12	8	12	0	28	20	8	16	12	20	8	8	12	8	24	8	16	8	4	20	0	16	12	5	16
2		8	20	28	0	4	40	20	8	12	16	8	20	4	10	4	8	20	12	24	28	16	8	8	4	8	16	8	8	12	12	8	8	20	8	16	12	12	24	16	12	12	4	6.66667	4	20	12	5	20
2.025		8	12	28	4	8	32	8	8	4	12	8	8	8	6.66667	16	16	16	24	20	24	12	12	12	4	8	16	8	16	12	16	8	0	8	8	20	16	4	24	12	12	12	12	20	4	8	16	5	28
2.05		8	8	24	4	4	28	12	4	12	16	8	4	16	0	20	12	16	16	12	24	12	16	16	4	8	16	8	32	28	20	12	4	4	12	4	16	8	24	12	16	12	12	13.3333	8	4	24	5	20
2.075		8	12	24	4	4	40	12	4	12	16	4	16	8	0	20	4	16	12	16	20	12	8	20	4	12	12	8	28	20	28	16	12	8	12	8	8	12	28	8	20	20	4	13.3333	8	8	16	10	12
2.1		12	12	20	4	8	28	12	12	20	8	4	20	8	6.66667	24	8	12	16	12	16	12	8	8	8	8	12	4	20	16	16	16	8	16	4	12	8	8	28	20	24	20	0	33.3333	8	12	12	5	12
2.125		12	8	20	0	8	24	16	12	28	12	8	20	12	10	16	12	12	20	20	16	8	12	4	20	0	20	8	28	24	16	8	0	16	0	4	16	4	28	20	16	20	4	26.6667	12	24	16	10	24
2.15		12	4	28	4	8	36	12	4	20	16	8	12	4	6.66667	16	8	20	24	16	20	8	8	12	16	4	16	8	28	16	32	4	4	12	8	8	12	4	20	4	16	8	8	13.3333	4	24	8	15	24
2.175		12	12	24	12	8	36	12	4	12	20	12	16	4	6.66667	16	12	20	8	16	24	4	8	16	0	12	12	8	16	12	24	8	4	16	16	8	8	8	32	12	24	8	16	26.6667	4	8	8	10	24
2.2		8	12	16	12	4	36	16	4	12	16	12	24	4	3.33333	16	8	16	16	32	16	8	12	8	0	12	16	4	20	20	20	12	4	12	8	0	12	8	28	8	16	12	16	26.6667	8	8	8	5	28
2.225		4	12	24	8	0	36	20	8	16	20	8	8	12	6.66667	16	12	24	24	24	8	16	8	12	0	8	16	8	20	12	20	16	4	4	4	4	8	8	12	8	8	8	12	20	4	12	8	10	28
2.25		12	12	24	12	8	28	24	8	16	20	8	12	12	6.66667	16	20	24	16	20	16	16	0	12	0	8	24	8	16	20	20	12	8	4	4	8	4	4	16	16	16	8	8	26.6667	0	8	12	20	32
2.275		16	4	24	8	12	24	12	4	16	12	8	24	0	0	20	12	12	8	16	20	20	0	8	4	8	16	0	16	24	20	8	12	8	4	12	0	4	16	12	20	16	0	20	4	12	12	10	32
2.3		8	8	16	8	8	32	8	12	12	8	12	20	4	0	20	16	16	16	16	16	20	8	16	12	8	4	4	20	16	12	8	4	12	12	16	4	12	16	8	8	16	8	13.3333	12	20	12	5	28
2.325		4	12	24	12	12	32	16	8	12	12	8	20	12	0	20	12	24	20	20	20	12	12	16	12	12	8	4	28	20	16	12	12	12	16	16	16	8	20	16	8	12	16	6.66667	20	24	8	10	24
2.35		4	8	36	4	12	32	12	0	20	20	4	16	16	6.66667	20	0	24	12	16	20	8	8	12	4	8	12	8	20	12	24	16	12	12	16	12	16	4	20	20	8	12	16	0	20	12	4	10	16
2.375		4	8	32	4	4	36	12	4	20	16	4	12	16	13.3333	12	8	20	12	20	24	8	8	12	4	0	16	12	20	12	20	20	16	16	12	8	16	4	20	16	0	8	16	6.66667	24	12	4	5	12
2.4		16	16	28	4	4	32	12	12	12	12	4	20	12	10	12	16	20	28	28	20	16	8	12	12	0	8	8	20	16	20	16	16	12	8	12	20	8	28	20	8	4	20	20	24	20	16	0	24
2.425		24	20	20	4	8	32	12	8	20	16	12	24	16	10	8	20	24	24	20	16	16	12	8	12	8	4	16	16	16	16	8	0	8	12	8	8	12	20	16	16	16	20	13.3333	20	16	12	10	32
2.45		8	8	16	8	4	36	12	4	24	16	12	20	12	6.66667	12	16	28	12	4	16	16	8	8	4	12	12	20	20	16	8	16	12	8	12	16	8	4	20	20	16	16	16	20	20	12	12	10	28
2.475		12	4	28	12	4	32	4	8	8	16	4	12	0	3.33333	20	8	16	8	20	24	12	0	8	8	4	8	8	24	16	16	12	12	4	8	24	16	4	28	16	20	12	16	26.6667	8	16	16	0	20
2.5		16	16	28	8	8	36	8	4	4	8	4	16	8	6.66667	12	8	12	12	16	28	0	4	12	12	0	8	4	28	20	20	8	0	4	8	20	20	8	24	16	20	28	16	20	4	16	16	10	20
2.525		12	20	20	8	12	36	16	8	12	8	16	16	12	3.33333	8	12	28	16	12	20	16	8	12	4	4	16	16	24	24	20	12	8	12	12	16	16	4	28	32	16	20	20	26.6667	8	8	16	15	28
2.55		12	24	24	4	8	32	16	16	12	16	12	8	16	0	16	12	28	20	16	12	20	12	16	12	8	12	12	20	16	24	12	20	20	12	8	8	4	24	32	12	16	12	20	4	12	20	10	32
2.575		12	16	20	0	4	36	20	8	12	12	4	16	16	6.66667	16	4	20	16	8	16	8	8	20	20	8	8	0	24	16	28	12	12	16	12	4	12	4	24	28	12	24	4	26.6667	0	24	28	15	28
2.6		8	4	24	8	12	36	24	4	20	4	8	20	4	10	8	4	16	12	16	20	4	0	12	16	8	12	4	28	16	20	8	12	12	12	0	16	8	24	24	20	20	4	20	16	20	16	10	16
2.625		0	8	28	8	12	32	16	12	20	12	8	12	4	6.66667	4	12	12	20	28	24	8	0	12	16	12	16	12	24	8	12	8	12	8	8	8	8	8	20	16	20	20	8	13.3333	16	16	8	5	16
2.65		12	8	20	4	4	40	8	8	16	16	12	16	8	13.3333	0	12	12	20	32	20	20	8	12	16	16	12	12	32	12	16	12	0	12	4	16	12	12	16	16	16	12	8	20	0	20	16	5	28
2.675		16	8	28	4	4	44	24	0	20	12	8	20	8	10	4	8	12	16	24	24	12	12	8	12	16	4	12	20	12	16	16	8	12	4	8	16	12	24	20	12	12	12	20	0	16	24	10	32
2.7		16	12	28	4	4	24	28	4	16	4	0	12	16	6.66667	16	8	12	12	24	32	8	8	4	8	8	12	8	20	20	20	24	8	4	8	4	12	0	20	20	12	20	20	13.3333	12	16	12	20	20
2.725		16	8	24	8	4	28	24	8	16	8	0	8	16	6.66667	20	12	20	12	24	24	8	8	8	4	12	24	4	28	16	20	20	0	8	8	16	8	8	16	16	12	20	20	13.3333	12	20	20	15	20
2.75		12	4	32	12	16	40	16	4	20	24	4	16	12	10	16	8	16	12	16	20	8	12	12	0	20	20	8	16	12	24	8	4	8	8	16	4	12	16	16	12	16	20	13.3333	4	24	20	10	32
2.775		16	12	16	8	12	32	16	0	16	20	12	20	12	6.66667	16	4	16	16	24	24	12	12	12	12	12	16	4	12	16	16	20	8	12	4	8	12	12	20	20	24	12	16	20	8	16	4	5	20
2.8		8	12	16	0	0	28	24	0	12	8	16	16	12	0	20	8	24	16	32	28	16	16	24	20	8	12	0	24	12	8	20	12	12	8	4	12	8	28	28	20	16	16	26.6667	4	12	12	0	16
2.825		4	12	32	8	4	36	16	4	12	16	12	16	24	6.66667	12	4	24	12	20	20	24	12	16	12	4	8	4	20	16	20	16	8	8	12	8	8	4	20	24	12	24	12	20	0	16	12	0	28
2.85		12	8	24	8	4	32	12	4	12	12	8	16	20	6.66667	12	4	24	16	16	12	20	4	8	4	0	8	8	12	20	20	20	8	12	4	12	8	8	12	12	20	28	12	26.6667	0	12	8	0	20
2.875		12	4	16	12	4	24	16	0	12	8	12	20	8	0	16	4	20	20	24	16	12	12	16	4	8	12	16	24	20	24	12	8	12	8	12	16	8	16	20	16	16	20	26.6667	0	12	8	0	24
2.9		4	4	8	20	12	36	20	0	16	12	12	24	8	10	8	4	20	16	16	24	8	8	12	8	12	12	12	20	20	24	8	4	12	12	8	24	8	32	20	24	16	20	20	8	12	8	0	24
2.925		8	4	8	12	8	32	20	0	16	12	12	12	8	13.3333	8	8	28	16	4	20	8	8	12	4	8	8	12	12	24	16	12	4	12	4	4	20	8	32	16	24	24	20	13.3333	12	16	24	5	20
2.95		12	8	20	12	8	28	16	8	20	20	16	4	12	3.33333	8	8	28	16	12	12	12	8	20	8	12	12	12	16	20	16	12	8	12	4	12	16	8	28	24	8	24	24	26.6667	8	24	20	5	24
2.975		12	8	20	12	8	36	16	8	20	20	8	8	12	3.33333	12	4	24	20	12	16	12	4	20	12	12	16	0	16	16	24	12	12	8	8	16	8	8	24	24	16	16	12	26.6667	8	24	4	0	24
3		8	4	20	12	4	36	16	8	16	16	8	16	8	13.3333	12	0	16	16	12	16	4	4	8	8	8	20	0	20	12	28	12	4	4	12	8	8	12	28	16	16	12	12	26.6667	4	20	0	5	32
3.025		16	8	20	12	4	36	16	8	24	8	16	28	8	10	12	4	20	8	32	8	4	4	8	8	8	16	0	16	12	24	8	8	8	8	16	12	8	28	28	16	12	28	26.6667	8	16	12	5	28
3.05		16	8	16	8	4	32	20	0	16	8	12	24	12	6.66667	8	4	32	16	24	12	8	8	8	4	8	8	0	20	12	24	16	16	12	4	20	8	8	24	24	20	12	20	13.3333	12	16	12	5	28
3.075		16	8	16	8	4	32	20	4	16	12	12	8	16	13.3333	12	0	28	20	20	28	16	8	4	4	8	20	0	24	12	16	24	16	4	8	8	16	8	32	16	24	8	8	20	8	20	4	15	36
3.1		16	8	20	16	4	28	20	4	28	12	16	12	16	13.3333	16	0	24	16	28	28	12	4	8	16	12	20	0	24	16	16	12	16	8	8	12	16	4	32	16	24	4	12	13.3333	8	16	8	10	28
3.125		4	8	28	12	8	32	20	4	12	20	8	16	12	13.3333	12	4	32	12	24	8	8	4	20	12	12	20	0	20	24	20	16	12	8	4	8	12	8	24	20	16	12	12	13.3333	4	12	12	5	24
3.15		4	12	24	4	4	36	16	8	20	20	4	12	8	13.3333	20	8	24	16	16	8	12	8	20	4	12	24	0	12	24	20	16	8	0	0	8	12	8	28	20	20	20	16	20	8	16	16	10	20
3.175		4	8	16	8	0	28	12	8	20	12	16	20	8	10	20	4	20	12	16	20	8	4	12	8	16	20	0	20	20	24	16	8	8	8	12	8	4	28	12	28	28	20	13.3333	16	16	16	15	24
3.2		4	16	24	8	4	28	12	4	16	8	16	16	16	3.33333	20	4	20	20	28	24	12	4	12	8	16	16	0	20	24	24	20	16	16	16	8	4	0	16	20	28	28	20	6.66667	12	20	12	15	28
3.225		4	16	28	12	8	44	16	0	20	8	8	20	16	3.33333	20	8	24	20	32	28	12	12	12	8	12	12	4	24	24	20	12	12	12	12	12	8	4	12	28	12	24	24	13.3333	4	24	12	5	20
3.25		8	12	20	8	4	28	16	8	16	8	4	20	12	6.66667	12	8	28	12	28	28	12	12	16	4	8	16	4	32	20	16	16	12	8	8	12	16	12	20	20	12	16	20	20	0	16	16	10	24
3.275		8	20	20	0	4	20	16	8	16	12	12	12	12	6.66667	4	4	12	24	24	28	16	8	16	12	4	8	12	32	24	12	24	16	4	8	12	8	8	24	16	24	12	8	6.66667	0	12	20	15	20
3.3		12	16	28	0	8	32	16	4	12	16	16	12	12	3.33333	12	0	16	20	24	24	12	8	8	16	8	16	12	28	28	12	16	8	8	4	16	8	0	20	28	16	12	16	20	8	12	16	10	24
3.325		16	8	28	0	8	16	12	4	16	12	12	16	8	6.66667	20	8	28	16	32	20	8	4	12	12	12	20	8	20	16	16	12	8	16	4	8	12	0	20	20	20	12	24	20	8	12	16	10	24
3.35		8	8	20	8	8	20	12	4	16	8	16	12	8	3.33333	20	8	20	16	32	16	12	0	20	12	8	8	12	12	16	20	12	12	12	16	4	16	0	16	16	24	8	12	13.3333	8	16	20	10	24
3.375		4	4	24	8	8	32	16	8	12	12	12	16	16	10	16	0	20	20	28	20	8	0	12	8	8	16	8	28	16	20	8	12	8	20	12	20	4	16	16	20	4	8	13.3333	16	12	24	10	28
3.4		8	8	32	4	8	36	12	8	12	20	8	24	12	13.3333	16	4	20	20	24	16	4	0	12	8	12	20	12	28	16	24	20	8	16	12	12	12	16	16	12	20	12	16	13.3333	12	16	16	15	24
3.425		12	20	16	8	8	40	20	4	20	16	12	12	4	3.33333	20	4	16	8	16	16	8	0	20	4	8	12	8	20	16	24	20	4	20	8	12	16	12	12	16	20	20	8	20	8	20	8	10	20
3.45		12	12	8	4	8	36	20	0	16	20	12	16	8	0	24	0	20	12	28	28	8	0	12	8	0	8	4	32	16	16	16	0	12	8	20	12	0	16	24	20	20	16	20	12	16	8	10	20
3.475		8	4	20	0	4	32	16	4	16	20	12	20	8	3.33333	16	4	20	16	32	28	8	0	12	16	0	12	12	28	28	20	12	4	12	4	12	4	4	12	16	20	12	20	26.6667	16	16	8	15	28
3.5		20	4	16	0	8	28	16	8	16	8	12	20	8	6.66667	8	8	20	16	24	28	4	4	24	12	8	12	8	20	24	24	8	8	20	8	8	12	8	16	16	20	8	12	13.3333	12	8	8	10	24
3.525		24	4	16	0	8	28	16	4	12	12	12	24	8	6.66667	12	8	16	12	28	20	8	8	16	8	12	12	8	32	24	24	16	12	24	16	16	8	8	20	20	16	20	24	0	4	12	8	15	28
3.55		24	12	28	0	0	20	12	0	12	12	8	16	4	6.66667	16	4	4	20	16	16	8	12	12	8	12	24	8	28	24	16	16	16	12	8	16	0	12	8	16	20	20	24	6.66667	0	16	12	15	40
3.575		16	8	28	12	4	24	12	4	8	16	8	12	12	20	20	4	8	20	8	16	8	8	20	8	20	24	4	16	24	4	8	12	8	4	16	0	8	12	20	24	12	16	6.66667	4	8	16	10	28
3.6		8	8	28	12	8	40	16	8	16	16	12	12	8	20	16	16	16	8	16	24	12	0	24	12	16	16	12	16	20	12	4	8	16	8	8	12	8	24	20	12	16	12	20	8	4	16	10	20
3.625		12	12	28	8	16	44	8	4	16	12	12	8	12	3.33333	12	12	20	8	24	20	4	8	24	12	16	24	8	16	16	16	12	8	8	4	8	12	8	28	20	12	12	8	20	8	12	4	10	32
3.65		16	12	32	12	20	28	16	8	16	16	8	4	20	6.66667	16	12	20	12	20	12	4	16	12	4	12	24	4	20	16	12	12	4	4	8	12	4	4	28	20	20	12	4	6.66667	4	20	8	5	28
3.675		16	16	24	4	12	20	24	12	16	20	12	4	8	6.66667	12	20	16	12	16	20	20	16	4	8	0	12	8	24	24	20	8	4	8	16	8	4	4	16	16	16	16	0	13.3333	8	16	16	5	12
3.7		8	24	12	4	4	36	20	8	4	12	16	16	0	3.33333	8	8	24	8	32	20	16	12	12	16	12	12	8	28	28	20	20	12	8	16	4	12	4	16	20	16	12	4	20	8	12	20	10	12
3.725		8	16	20	8	8	24	16	4	8	4	8	20	4	6.66667	16	12	32	12	24	20	8	12	12	8	16	8	16	24	28	16	16	8	8	12	0	20	8	20	20	16	16	12	33.3333	8	12	20	15	24
3.75		16	0	28	8	8	24	20	4	12	8	8	16	8	10	20	16	32	16	16	16	16	16	16	8	8	4	12	16	24	20	8	0	12	4	8	16	12	20	16	20	16	12	33.3333	16	12	16	10	20
3.775		12	4	24	4	0	44	16	4	12	8	20	12	8	10	20	16	28	16	28	8	12	16	16	8	8	16	4	20	24	20	16	0	16	8	16	16	12	16	20	24	16	4	20	16	8	8	5	20
3.8		8	4	16	8	12	40	16	4	16	12	16	16	12	6.66667	12	16	16	12	24	12	16	12	12	4	12	20	8	28	20	16	24	8	20	12	12	24	12	12	20	28	12	8	20	12	16	12	10	28
3.825		12	4	20	16	12	32	12	12	20	12	8	16	8	3.33333	8	12	20	12	20	20	20	8	16	8	20	8	12	20	16	16	16	20	24	8	12	20	4	24	24	16	8	20	20	4	20	20	5	28
3.85		8	16	24	8	4	28	12	8	28	12	8	8	4	0	20	20	28	16	24	16	12	8	16	8	12	0	12	20	24	20	16	12	20	8	8	4	8	20	28	20	8	20	20	4	20	12	5	20
3.875		4	12	24	4	8	32	24	4	20	16	12	12	8	6.66667	16	12	20	12	24	12	12	8	16	8	4	8	8	28	20	24	12	8	12	16	8	12	8	16	24	28	8	16	13.3333	8	16	8	5	20
3.9		16	0	32	8	8	32	12	8	20	12	12	12	4	6.66667	8	8	16	16	28	12	12	20	12	16	16	12	4	24	24	20	16	12	8	24	20	16	8	20	16	20	12	16	20	4	12	16	0	28
3.925		16	0	28	12	4	24	8	16	16	8	12	12	4	0	8	8	24	20	16	12	12	16	24	12	16	16	4	20	20	20	28	4	4	12	16	16	12	20	12	20	12	12	33.3333	8	12	16	5	24
3.95		12	8	20	8	0	36	20	12	12	4	16	12	8	6.66667	16	4	24	16	20	16	16	8	24	0	12	16	4	16	8	20	20	8	4	8	16	12	8	24	16	24	16	12	20	8	12	8	10	24
3.975		12	8	20	0	8	44	16	4	28	0	8	12	4	6.66667	16	4	12	12	32	16	16	16	16	0	12	20	0	12	8	12	20	16	12	12	28	4	4	28	20	20	24	12	20	8	20	8	5	20
4		12	0	28	0	8	32	8	8	24	12	12	16	12	6.66667	12	4	16	20	20	20	16	12	24	8	8	16	8	20	12	16	16	12	16	12	20	4	8	20	24	16	24	8	20	12	12	8	5	20
4.025		12	8	24	4	4	28	8	8	16	12	16	8	12	6.66667	16	12	16	20	12	16	20	4	12	16	4	8	8	28	24	20	16	4	16	16	8	8	8	12	20	8	16	12	20	8	8	4	10	28
4.05		8	12	24	12	4	28	16	4	8	12	12	4	8	3.33333	16	8	12	12	24	16	20	0	8	8	8	16	0	20	20	16	16	4	20	8	8	20	8	28	24	8	16	20	26.6667	8	20	12	10	28
4.075		8	8	20	8	8	32	16	0	4	20	8	12	24	10	12	4	20	12	20	16	16	4	12	4	12	12	4	20	16	20	16	12	20	0	12	28	8	32	32	20	16	12	20	8	16	12	15	24
4.1		4	8	20	4	16	36	12	12	20	8	4	12	20	6.66667	8	8	20	12	8	24	20	16	4	4	8	12	4	24	20	28	12	8	20	12	12	16	4	16	20	28	20	4	20	8	4	12	10	16
4.125		8	4	24	12	8	32	16	12	24	8	4	8	8	0	12	4	20	16	28	40	12	12	12	4	8	24	0	24	12	16	4	4	20	16	12	4	12	8	16	28	24	12	20	4	8	16	0	12
4.15		12	8	20	8	0	36	16	0	12	8	4	16	16	13.3333	16	8	16	20	28	20	8	4	24	8	12	24	0	28	20	16	20	8	12	8	12	8	12	12	24	20	16	12	6.66667	4	12	4	5	28
4.175		8	8	28	0	8	40	16	4	12	4	4	20	12	13.3333	16	12	12	20	20	20	12	12	16	4	12	16	4	28	28	28	16	8	12	16	4	16	4	20	20	12	8	8	13.3333	8	8	8	10	28
4.2		12	4	32	4	8	36	16	8	12	8	8	8	8	6.66667	12	8	20	24	16	32	4	8	16	8	4	20	4	28	24	28	12	8	16	28	8	20	8	20	16	16	12	12	20	4	16	8	10	16
4.225		12	16	20	4	0	28	24	8	16	12	12	12	20	10	12	12	24	24	16	16	8	12	12	16	0	20	4	24	16	24	16	12	12	24	16	16	8	24	16	20	20	16	6.66667	16	16	0	5	20
4.25		8	16	16	0	0	32	16	8	12	16	8	24	12	10	20	8	20	12	24	8	8	16	0	8	4	16	4	20	20	24	16	12	4	8	8	12	8	20	16	28	16	16	6.66667	16	16	16	0	24
4.275		8	12	28	0	4	32	16	8	16	12	8	24	8	6.66667	20	4	20	20	24	20	0	8	16	12	16	16	8	20	28	20	20	4	0	8	12	4	12	16	12	28	8	20	6.66667	8	20	16	5	32
4.3		4	8	32	0	8	32	16	8	16	12	12	20	12	3.33333	20	4	24	20	16	20	20	8	20	12	16	20	8	16	20	12	24	8	4	12	16	8	8	20	8	20	12	20	13.3333	12	16	8	15	28
4.325		8	8	28	8	4	32	12	4	12	12	12	16	4	6.66667	20	8	28	16	16	20	20	4	8	4	8	16	4	20	16	24	16	8	4	4	8	16	16	24	20	8	12	20	13.3333	8	16	16	15	16
4.35		12	12	24	8	0	24	12	8	20	12	12	12	8	3.33333	24	12	32	20	16	32	4	8	12	4	12	16	8	28	24	28	12	8	0	0	8	16	16	24	28	12	12	16	20	12	16	16	10	20
4.375		12	12	20	4	0	20	12	8	16	16	4	12	16	3.33333	24	4	32	16	16	28	12	8	12	4	12	16	4	32	20	24	16	8	4	4	12	16	4	16	20	20	16	8	20	12	8	12	10	28
4.4		8	12	16	8	0	28	16	4	12	8	16	12	12	13.3333	16	4	28	20	16	24	12	4	16	4	4	8	4	28	16	20	12	4	12	12	12	8	0	12	16	24	12	8	6.66667	4	8	8	15	32
4.425		0	12	20	20	0	36	12	4	16	8	24	8	12	10	16	8	24	20	24	24	4	4	20	8	4	12	4	24	24	16	16	8	12	16	12	16	0	20	24	20	4	8	20	8	16	8	10	36
4.45		8	12	24	24	4	28	12	4	16	12	12	4	12	3.33333	12	12	20	20	28	20	20	4	16	12	12	12	8	16	16	12	8	12	12	16	12	20	4	20	20	16	12	12	20	16	12	16	0	24
4.475		12	4	20	16	4	28	12	4	4	16	16	8	4	6.66667	20	8	24	16	20	8	20	8	12	8	8	12	8	12	4	20	8	16	8	12	4	16	8	20	20	24	20	20	26.6667	12	8	20	0	24
4.5		4	0	20	16	0	32	24	0	4	12	12	8	4	3.33333	28	0	20	8	32	12	0	8	12	12	4	8	8	16	4	20	20	12	12	4	0	12	12	20	20	24	20	20	20	8	16	12	10	28
4.525		4	8	20	12	0	32	24	4	12	8	4	8	8	3.33333	16	4	20	16	32	24	8	4	12	12	8	8	8	28	12	16	24	4	16	8	0	16	12	16	12	24	16	16	20	4	20	4	10	32
4.55		8	16	16	12	0	32	12	8	16	12	8	8	8	10	12	12	24	20	24	20	8	0	16	4	8	16	4	36	16	16	20	0	8	8	8	20	8	20	20	20	12	12	26.6667	12	20	4	5	20
4.575		4	12	16	8	4	32	24	4	24	8	8	0	12	6.66667	20	12	20	24	24	20	12	4	12	4	12	16	12	24	24	12	16	0	12	12	12	12	8	12	16	12	8	4	13.3333	12	16	8	10	16
4.6		4	12	20	8	4	24	24	0	28	12	20	12	12	6.66667	16	12	16	16	20	12	20	4	12	12	24	16	8	24	20	16	16	4	12	16	8	4	4	8	20	16	8	0	20	8	16	8	10	24
4.625		12	12	16	8	4	32	12	4	24	20	16	28	8	13.3333	16	8	12	12	20	4	16	0	20	8	16	16	0	24	12	16	16	8	8	8	12	16	8	16	16	12	20	8	26.6667	12	12	12	5	24
4.65		12	12	16	8	8	40	12	4	16	16	12	20	16	6.66667	20	0	16	20	20	20	12	4	20	20	0	8	0	28	24	16	16	8	8	12	16	20	8	20	16	8	24	8	13.3333	8	8	16	15	28
4.675		4	12	20	8	12	36	16	4	8	12	16	12	16	3.33333	16	4	20	20	24	28	20	4	16	20	16	8	12	28	24	16	16	8	12	16	12	4	4	20	24	24	12	4	13.3333	4	8	16	20	24
4.7		4	4	20	0	20	36	20	16	24	12	4	12	8	10	12	8	20	24	32	12	20	4	12	8	16	20	16	28	24	20	16	20	16	8	12	0	8	20	12	24	4	12	13.3333	8	12	12	5	16
4.725		12	0	20	4	12	28	24	12	24	12	8	16	12	6.66667	12	8	16	20	28	16	12	4	12	12	8	20	4	32	20	20	8	20	20	4	12	0	8	24	12	16	12	8	6.66667	12	20	12	5	20
4.75		8	8	20	12	0	32	16	4	12	16	8	16	8	3.33333	12	8	12	20	28	24	12	8	20	8	12	16	0	28	8	16	4	12	16	8	20	4	12	36	24	24	24	8	13.3333	12	20	12	15	28
4.775		8	16	24	8	12	36	8	4	20	12	0	8	20	10	8	4	16	20	16	12	8	20	16	12	4	16	4	24	24	20	4	12	8	8	20	12	16	36	16	24	20	12	13.3333	12	16	16	20	24
4.8		16	8	28	0	16	28	8	8	24	8	0	16	32	10	12	4	12	12	20	4	8	16	16	16	16	12	4	12	32	32	8	4	12	8	4	8	12	24	8	20	12	12	20	12	4	16	15	24
4.825		16	4	28	4	4	32	8	12	20	16	4	16	16	3.33333	8	4	12	24	24	8	16	4	24	8	16	8	4	16	20	28	8	8	12	8	8	4	4	20	24	24	16	12	20	8	4	12	10	28
4.85		8	8	28	8	8	36	20	4	24	12	4	8	12	0	8	4	20	24	20	12	16	8	12	0	0	4	4	20	12	24	12	12	16	8	12	16	8	24	24	20	20	16	13.3333	0	12	16	5	32
4.875		4	8	28	12	8	28	24	0	24	8	4	20	16	3.33333	16	12	12	16	12	8	12	12	16	4	8	4	8	16	20	32	20	12	12	12	16	20	8	24	20	24	12	20	13.3333	8	8	8	5	24
4.9		8	12	20	16	4	36	20	0	8	20	8	16	12	6.66667	12	12	12	16	8	20	16	12	12	16	12	4	12	20	24	20	16	12	0	16	20	8	4	20	28	28	8	8	20	12	12	12	15	24
4.925		8	16	16	8	8	36	12	8	16	20	8	12	4	6.66667	12	8	16	12	24	28	20	4	12	20	8	0	8	20	24	16	16	4	4	16	12	4	16	24	24	24	16	16	20	12	24	20	10	28
4.95		12	16	28	4	4	28	8	8	28	16	8	20	0	6.66667	20	8	8	8	24	20	16	8	20	12	12	8	12	24	28	24	16	4	16	16	8	12	12	28	12	16	20	16	13.3333	12	24	12	5	32
4.975		12	8	24	8	4	20	12	0	16	16	4	20	8	6.66667	16	4	8	12	12	20	8	12	16	8	8	16	8	20	20	20	12	8	16	16	4	16	0	28	12	12	16	12	26.6667	8	20	12	10	24
5		8	8	20	8	8	32	12	4	16	16	4	24	20	3.33333	8	4	12	8	16	28	8	4	16	8	8	20	4	16	24	20	8	12	12	12	8	16	0	24	16	16	16	20	20	8	8	12	10	28
5.025		4	12	28	4	4	40	20	8	24	16	4	28	16	6.66667	8	8	16	12	24	24	20	4	12	12	16	16	12	20	24	28	12	12	16	12	8	16	4	16	12	28	16	20	0	4	4	16	5	24
5.05		8	4	28	4	4	20	16	8	20	12	4	16	8	10	12	4	24	24	24	20	16	4	8	12	12	12	8	20	12	28	12	4	16	12	8	12	12	24	20	28	20	16	13.3333	0	8	16	5	28
5.075		12	8	20	4	4	28	8	4	20	16	8	16	8	6.66667	20	4	28	12	24	24	16	4	12	8	8	16	4	20	20	16	12	12	12	16	12	16	8	24	32	16	20	4	20	16	8	12	20	28
5.1		4	16	24	0	8	32	12	4	24	24	12	12	8	3.33333	20	4	20	4	24	24	24	4	12	12	12	12	4	28	28	8	16	12	12	16	8	20	12	24	32	16	8	0	33.3333	16	12	16	15	16
5.125		20	12	24	4	12	24	16	4	20	16	8	12	4	3.33333	20	4	12	20	24	24	20	4	12	8	8	12	0	28	24	12	20	4	12	4	16	20	12	20	28	20	4	12	33.3333	4	8	16	5	20
5.15		24	12	20	4	4	28	16	0	16	8	0	16	4	3.33333	24	4	20	20	24	20	16	4	16	0	4	20	0	12	20	20	16	16	8	4	16	20	8	16	20	24	16	16	13.3333	12	16	20	5	28
5.175		8	8	24	4	0	24	8	4	8	12	0	8	4	0	20	8	16	4	28	12	12	4	16	0	12	20	0	12	24	12	12	16	16	12	12	12	4	20	12	28	16	20	13.3333	8	16	20	5	40
5.2		8	8	24	8	4	24	12	4	4	12	4	12	4	0	20	12	16	16	24	16	8	4	8	8	12	12	0	20	24	8	16	4	16	8	12	16	4	16	8	24	8	28	13.3333	12	0	12	15	32
5.225		16	4	28	4	4	36	12	4	16	12	8	20	12	3.33333	12	8	20	24	12	20	4	0	8	20	12	12	4	16	20	12	20	8	16	4	8	16	4	24	16	20	24	12	13.3333	16	8	12	20	20
5.25		16	12	24	0	8	28	12	4	24	8	8	16	8	6.66667	4	8	20	8	20	12	20	8	12	16	12	12	8	24	20	12	12	8	12	4	8	4	0	28	24	20	20	12	13.3333	4	12	16	10	24
5.275		16	12	16	8	12	28	16	4	20	4	8	12	8	13.3333	16	8	24	16	24	12	20	12	8	8	4	16	16	32	16	16	12	8	12	0	4	12	4	16	20	16	8	16	20	4	12	20	10	24
5.3		16	16	20	8	12	32	12	4	20	8	8	16	12	10	20	4	16	28	12	16	8	8	8	8	4	16	12	16	16	20	24	16	16	12	4	20	8	16	8	20	20	8	13.3333	16	20	16	10	24
5.325		12	20	24	4	4	28	12	0	16	8	12	20	8	3.33333	24	4	20	16	28	20	12	8	16	12	12	12	12	4	12	16	16	12	16	16	16	16	4	24	12	24	16	12	20	16	12	12	5	24
5.35		12	4	16	12	4	28	16	0	24	12	12	16	8	6.66667	20	4	28	12	28	16	24	8	16	12	12	16	8	16	16	12	12	12	16	4	12	8	0	24	16	20	16	12	26.6667	4	8	20	5	24
5.375		12	8	24	8	4	36	16	8	28	16	8	20	4	10	8	0	20	12	12	20	20	4	16	8	4	20	4	24	16	16	20	8	12	4	4	8	0	28	16	16	24	16	13.3333	4	16	16	5	24
5.4		8	8	32	4	4	32	16	8	8	8	8	16	8	10	12	0	20	16	16	24	8	0	24	4	16	24	12	20	12	20	20	4	12	12	8	12	4	24	16	12	20	20	20	8	16	12	10	20
5.425		12	12	24	8	8	28	20	0	12	8	8	12	12	6.66667	16	8	32	20	24	16	12	0	16	8	16	20	12	20	16	32	20	12	12	8	8	12	8	12	16	12	20	16	13.3333	4	16	12	10	24
5.45		16	16	24	8	8	32	12	8	28	12	4	16	12	6.66667	8	12	20	12	24	16	12	8	20	12	4	20	8	24	8	28	16	12	8	4	8	12	4	12	16	16	24	20	0	8	16	8	5	28
5.475		16	12	32	8	12	36	12	12	28	16	4	16	12	6.66667	12	8	16	20	20	12	16	8	20	16	8	24	4	28	12	16	4	4	12	12	12	16	0	20	8	12	20	16	20	20	12	12	10	28
5.5		16	16	24	8	8	36	16	8	24	16	4	16	4	6.66667	12	8	20	20	20	12	12	4	16	12	12	16	8	24	20	24	4	8	24	12	12	20	8	20	12	4	12	8	26.6667	16	8	20	15	16
5.525		8	8	20	4	0	32	20	4	24	12	0	16	12	10	16	8	16	16	16	20	8	12	20	12	12	12	8	16	20	28	16	8	20	8	8	12	8	28	20	16	16	8	20	12	20	20	10	16
5.55		8	0	28	4	0	32	20	4	24	12	4	20	20	6.66667	24	8	20	16	20	24	20	12	12	16	16	20	4	16	24	24	16	0	16	12	8	8	4	24	20	28	16	8	26.6667	8	20	20	15	20
5.575		16	12	24	4	0	28	16	4	16	16	4	12	16	3.33333	12	4	28	12	24	24	16	12	8	8	16	12	8	16	16	20	12	8	12	8	12	8	12	20	12	16	16	8	20	4	16	16	10	20
5.6		16	12	20	8	4	28	12	4	16	16	12	8	12	3.33333	16	16	28	24	20	24	8	12	16	16	12	12	8	16	20	20	16	8	16	12	16	12	12	24	16	16	24	4	20	8	24	16	10	28
5.625		8	4	20	8	4	32	12	8	16	24	20	16	12	3.33333	24	16	16	20	24	24	16	4	24	12	16	20	4	20	28	12	12	4	12	12	16	20	8	16	20	16	12	4	20	8	16	24	10	32
5.65		8	12	20	8	0	32	24	12	16	20	16	12	12	13.3333	16	4	24	20	16	24	16	8	20	4	8	8	0	20	24	12	12	8	8	4	16	16	8	16	12	8	8	12	20	4	16	16	5	32
5.675		8	12	36	12	4	36	28	8	16	16	12	4	4	10	12	4	24	20	12	20	12	8	16	4	0	12	12	24	20	12	16	8	8	8	12	20	8	16	16	16	20	12	20	0	24	12	5	24
5.7		4	8	32	4	8	36	24	0	16	20	16	12	4	10	12	8	20	12	12	16	16	8	12	4	0	12	12	20	16	16	20	12	8	4	16	20	12	20	20	24	16	12	20	4	12	20	0	16
5.725		8	8	24	8	12	28	28	4	12	16	16	12	8	16.6667	16	8	20	16	16	24	8	8	12	12	8	12	0	24	24	20	16	16	8	4	28	8	8	16	16	16	12	16	26.6667	4	16	16	5	24
5.75		20	8	28	12	8	32	20	4	12	20	8	12	8	10	16	0	16	16	16	24	8	4	20	12	12	16	4	20	24	12	12	8	0	4	20	12	4	20	16	20	16	16	33.3333	12	20	16	5	32
5.775		16	12	28	4	8	36	12	4	24	16	12	12	12	6.66667	12	8	12	20	16	20	12	8	16	16	12	20	8	20	16	20	16	4	0	8	4	8	4	28	20	20	8	20	40	16	12	16	0	28
5.8		4	12	32	4	12	36	12	4	24	16	12	12	8	3.33333	12	8	20	20	20	28	12	4	12	16	16	20	4	28	20	20	16	8	4	12	0	12	8	20	20	4	8	24	33.3333	8	8	8	0	24
5.825		4	4	32	8	8	36	8	0	16	12	4	12	8	3.33333	16	0	20	20	20	24	16	8	12	4	16	8	4	20	24	20	16	8	12	12	4	16	8	24	20	16	20	16	26.6667	8	20	16	10	28
5.85		16	12	20	12	8	32	12	0	12	8	4	20	12	6.66667	24	4	16	20	16	16	12	16	8	8	12	4	12	16	24	28	16	8	12	8	16	12	8	16	20	20	20	16	20	8	20	20	20	28
5.875		12	16	20	16	12	28	12	0	20	12	12	16	4	13.3333	20	8	24	20	16	20	8	12	8	8	4	4	8	12	20	24	16	8	4	4	20	16	8	24	24	8	8	20	26.6667	12	16	16	10	20
5.9		12	8	24	8	12	36	16	4	24	12	16	4	4	10	20	4	20	24	16	20	8	8	12	4	16	16	4	12	16	20	16	4	12	12	16	16	4	28	24	12	12	12	26.6667	8	16	20	10	24
5.925		16	12	20	8	8	40	20	4	20	16	12	12	8	6.66667	12	4	20	20	16	20	12	12	16	12	20	24	8	20	16	16	20	4	20	8	16	16	8	16	16	8	12	8	20	0	12	16	10	32
5.95		12	12	24	12	12	32	16	4	20	16	4	12	8	13.3333	8	8	20	20	24	32	16	8	20	8	8	16	8	20	20	8	16	12	16	4	16	16	4	32	12	16	8	8	13.3333	4	16	8	0	24
5.975		8	12	24	8	8	36	12	4	12	16	0	20	12	6.66667	20	4	12	20	28	32	16	0	16	8	8	8	16	20	20	8	12	12	12	16	12	12	4	24	12	24	16	8	6.66667	12	20	8	5	24
6		12	8	20	8	4	40	16	4	4	16	4	28	12	3.33333	16	0	20	16	24	28	12	12	12	8	8	8	20	24	12	16	12	8	8	12	16	8	4	16	16	20	20	12	20	12	24	4	5	24
6.025		12	8	24	4	8	32	20	4	8	12	8	16	4	10	20	0	32	24	12	20	8	12	16	12	16	12	20	20	16	16	12	12	4	4	12	4	4	20	16	20	12	16	26.6667	12	16	8	10	20
6.05	odor on	0	8	24	8	8	36	12	0	12	16	4	4	8	10	20	0	16	24	20	16	12	4	12	16	12	20	20	28	16	12	8	16	16	8	4	4	4	20	12	16	16	12	20	12	16	12	10	28
6.075	odor on	0	12	28	8	8	36	16	4	20	20	4	12	16	13.3333	12	8	16	16	20	24	16	4	4	4	0	16	12	28	8	12	16	8	20	4	8	8	4	24	16	20	20	8	20	8	28	12	5	24
6.1	odor on	8	20	28	4	4	24	16	8	20	16	8	20	12	13.3333	12	8	28	16	24	20	8	4	4	4	8	8	12	20	20	12	16	4	12	4	12	12	8	24	24	20	16	8	26.6667	8	24	12	5	24
6.125	odor on	12	12	24	8	4	32	12	4	8	12	4	16	8	10	24	4	20	12	24	24	8	8	8	12	8	4	16	24	20	20	16	16	16	12	8	12	4	32	24	12	20	8	26.6667	4	16	16	0	28
6.15	odor on	8	8	20	8	8	40	12	0	12	20	0	12	8	10	20	4	12	16	24	24	12	8	16	20	0	12	12	20	16	16	20	16	16	12	8	12	8	28	20	16	12	8	13.3333	0	24	24	0	24
6.175	odor on	12	12	24	8	8	36	12	0	16	20	8	16	8	6.66667	8	4	12	12	20	20	16	4	28	12	8	20	8	16	16	16	12	8	16	12	12	20	12	20	16	28	0	20	20	16	24	16	0	20
6.2	odor on	24	8	28	8	4	36	16	4	20	16	12	32	12	10	12	16	16	16	16	28	16	4	20	8	12	12	12	8	16	20	16	8	20	12	8	20	4	20	20	36	12	32	33.3333	20	16	20	5	24
6.225	odor on	24	8	24	12	0	40	24	8	20	16	8	32	16	13.3333	12	16	12	20	24	28	16	12	20	8	8	12	12	16	20	16	16	12	20	16	16	12	4	24	20	28	28	28	33.3333	4	16	16	10	28
6.25	odor on	12	8	24	12	4	44	20	12	16	8	8	28	12	13.3333	20	12	16	16	12	28	12	12	32	12	12	20	8	28	20	24	16	12	16	20	20	16	4	20	12	24	24	20	33.3333	8	20	16	15	32
6.275	odor on	12	8	24	8	8	40	12	12	20	12	8	32	12	6.66667	12	12	16	16	12	20	16	12	24	12	12	20	12	24	20	36	28	16	12	8	16	20	8	24	20	32	16	20	26.6667	20	20	32	15	28
6.3	odor on	20	20	32	4	20	28	20	8	12	20	4	32	12	3.33333	12	4	12	16	20	20	16	12	20	8	12	12	8	24	24	36	16	16	16	0	8	16	12	24	24	24	20	24	20	12	16	24	25	16
6.325	odor on	16	16	32	4	16	28	20	4	12	20	0	20	8	6.66667	28	12	24	16	20	28	8	4	24	16	16	20	0	20	36	24	0	4	16	4	8	20	8	24	24	24	20	24	20	4	20	20	25	20
6.35	odor on	20	16	24	12	8	36	24	8	24	16	12	24	8	6.66667	24	16	24	16	28	36	16	4	32	12	16	20	4	20	24	24	8	8	12	16	8	24	4	28	28	32	16	20	33.3333	20	20	24	20	28
6.375	odor on	20	12	32	16	12	32	24	20	20	8	16	28	16	6.66667	16	8	16	20	32	44	16	12	20	12	8	20	4	32	24	32	16	8	12	20	0	20	8	24	20	20	16	20	33.3333	24	20	24	20	28
6.4	odor on	12	0	36	16	12	28	16	16	16	8	8	20	16	6.66667	12	8	24	16	20	32	12	12	4	24	0	28	4	28	32	28	20	4	8	12	8	20	16	28	16	16	20	28	20	12	16	24	5	24
6.425	odor on	12	8	24	8	16	32	12	8	20	4	16	28	8	10	20	12	24	20	20	32	8	20	16	12	8	24	8	24	20	20	16	8	12	8	12	24	16	24	20	12	20	16	26.6667	16	16	20	5	28
6.45	odor on	16	12	28	8	16	44	16	16	12	8	24	28	8	6.66667	32	12	24	16	24	32	12	20	20	8	20	24	4	24	20	20	12	8	24	8	12	20	12	24	24	16	20	8	33.3333	16	16	20	5	24
6.475	odor on	12	8	36	12	8	52	28	12	12	20	16	20	16	0	24	8	32	12	16	24	20	12	24	16	16	16	8	24	24	24	24	8	16	12	16	28	4	28	28	24	24	16	26.6667	16	12	24	10	24
6.5	odor on	12	12	36	12	12	40	24	12	20	20	12	16	16	10	24	4	28	12	16	28	16	12	28	16	16	20	12	28	16	24	20	8	0	12	20	28	4	20	28	12	20	8	26.6667	16	20	20	15	32
6.525	odor on	20	12	36	12	20	28	12	16	16	16	8	24	12	10	28	4	20	12	20	32	4	8	24	12	16	28	12	20	16	28	16	8	8	12	16	24	12	20	16	12	16	8	20	8	16	20	10	24
6.55		12	4	32	8	20	32	20	12	12	12	4	32	8	13.3333	16	8	24	24	16	32	4	8	24	8	8	24	12	20	28	28	20	12	20	12	12	32	16	24	8	12	20	20	20	8	12	16	20	24
6.575		8	4	20	12	16	36	28	12	24	8	12	24	4	13.3333	16	8	20	24	12	28	12	8	24	4	8	24	12	28	24	32	16	12	20	4	12	20	20	28	24	12	16	20	26.6667	12	20	8	15	20
6.6		12	12	20	8	12	28	16	12	20	16	16	12	12	3.33333	24	4	16	12	24	20	20	4	20	4	8	24	12	20	16	36	16	12	16	4	16	16	16	28	32	24	8	16	33.3333	8	16	20	15	20
6.625		12	12	24	12	16	36	12	8	20	24	8	20	12	13.3333	20	4	20	8	24	20	16	0	24	12	12	12	8	12	12	28	16	8	12	12	16	24	16	12	24	20	4	16	33.3333	12	20	24	20	24
6.65		16	8	20	12	12	40	20	16	32	20	0	32	12	10	8	4	16	16	20	28	12	0	16	12	20	12	16	24	16	20	12	12	12	12	16	16	16	12	24	20	4	8	26.6667	16	16	20	10	16
6.675		16	12	20	8	4	32	16	16	24	16	12	20	12	6.66667	8	4	16	24	20	24	16	8	16	20	16	20	16	20	20	20	12	20	16	8	16	16	12	24	20	24	8	0	20	8	12	16	10	24
6.7		12	12	12	8	8	28	12	8	24	12	12	4	12	10	12	8	24	16	20	16	16	12	16	20	12	8	4	16	12	28	12	12	12	12	8	16	12	20	24	20	8	0	20	12	24	4	10	28
6.725		12	12	16	0	8	24	12	4	24	20	4	4	12	10	12	8	32	4	16	20	16	4	8	20	12	4	12	24	8	20	12	12	16	12	4	4	8	24	32	16	8	4	20	12	16	8	15	20
6.75		12	12	16	4	0	28	8	0	24	24	8	8	4	13.3333	12	8	20	8	12	20	16	8	8	16	12	12	16	20	24	16	16	16	16	8	12	4	8	20	32	16	12	8	6.66667	8	12	20	15	24
6.775		12	12	24	8	4	32	12	4	20	20	4	8	8	10	12	8	16	16	24	16	16	16	8	8	12	16	8	20	36	28	16	8	4	8	16	8	8	20	28	16	16	12	13.3333	8	16	16	10	32
6.8		12	8	28	4	12	32	16	8	16	16	0	4	16	3.33333	24	8	24	16	24	24	16	12	8	20	12	12	12	24	24	28	16	8	0	4	4	12	4	28	16	20	12	12	13.3333	12	16	4	10	28
6.825		12	12	24	4	8	32	16	12	20	8	8	12	12	3.33333	20	4	16	16	20	24	8	8	16	16	8	4	20	28	16	20	20	8	4	4	4	16	4	20	16	28	12	8	6.66667	12	16	4	5	20
6.85		8	12	36	8	8	28	16	12	20	16	8	16	12	10	4	8	20	16	16	12	8	4	16	4	8	8	16	28	28	20	16	0	16	4	8	16	12	24	20	20	24	12	20	12	20	8	0	20
6.875		8	0	36	8	8	32	16	16	24	16	12	8	8	10	0	12	24	16	4	8	16	4	12	4	8	8	8	16	24	32	8	8	12	8	4	8	8	16	12	20	20	8	13.3333	12	20	8	0	20
6.9		4	4	24	4	4	36	16	12	16	12	16	8	8	6.66667	8	8	24	12	12	16	20	4	8	8	12	12	8	16	16	24	16	12	8	12	4	4	0	12	8	20	16	4	6.66667	4	16	4	5	28
6.925		8	12	20	4	12	36	12	12	16	8	4	12	12	6.66667	16	12	24	16	20	12	12	8	8	8	12	24	8	16	12	12	28	4	12	8	12	12	4	24	12	16	20	8	13.3333	8	16	0	10	36
6.95		20	20	20	12	12	32	8	20	24	12	4	12	16	6.66667	20	16	16	12	20	4	8	12	8	4	16	16	12	20	12	8	20	0	16	8	12	16	4	24	8	20	12	12	6.66667	8	16	8	10	28
6.975		12	16	16	12	20	20	12	12	20	16	8	12	20	3.33333	24	8	16	16	16	20	12	16	4	8	16	4	12	24	24	16	12	8	16	12	8	12	0	28	20	24	12	12	13.3333	12	20	12	10	24
7		8	12	24	16	16	20	16	4	24	16	12	16	8	3.33333	16	0	12	20	16	20	12	12	12	8	8	4	8	24	20	24	8	8	12	12	8	16	0	20	24	20	16	8	20	20	16	4	20	16
7.025		20	12	24	20	4	28	20	4	16	20	12	12	8	6.66667	12	8	16	12	32	16	16	8	12	12	16	4	4	24	12	24	0	8	12	4	4	12	0	12	20	12	16	8	6.66667	12	12	4	20	8
7.05		16	4	24	12	8	36	12	12	12	16	12	12	12	6.66667	12	12	20	12	28	24	16	8	12	8	16	8	0	12	12	20	12	16	8	4	8	8	4	16	24	16	8	4	6.66667	8	16	12	15	20
7.075		16	8	24	12	8	36	8	12	20	20	8	8	8	3.33333	20	12	16	16	24	20	16	8	16	12	8	12	0	12	20	12	20	12	4	16	12	12	4	20	20	24	4	4	13.3333	16	16	16	10	32
7.1		20	12	24	8	4	36	16	8	12	20	0	4	4	3.33333	24	16	20	16	24	16	12	16	20	16	16	4	0	24	20	4	20	12	12	12	8	16	0	20	16	16	0	4	20	12	16	8	10	24
7.125		12	12	24	12	8	40	16	8	16	16	0	16	12	13.3333	16	8	20	12	20	24	12	12	28	8	16	8	8	28	8	4	12	12	12	12	12	20	8	32	8	12	4	8	20	8	12	8	20	28
7.15		16	20	20	12	8	28	12	4	16	16	8	20	16	13.3333	12	0	16	20	20	24	8	8	16	8	8	12	8	16	16	16	8	12	4	16	8	16	20	28	16	20	12	16	20	8	16	12	15	20
7.175		20	20	24	0	4	20	4	0	12	8	8	12	4	6.66667	12	12	20	16	12	12	8	8	4	12	8	8	0	20	16	20	16	8	8	8	0	12	12	16	24	24	16	16	20	4	24	20	15	24
7.2		12	16	20	4	12	36	4	0	12	4	4	16	4	6.66667	16	20	24	16	16	16	16	16	12	8	4	20	4	28	16	20	8	0	4	8	8	12	0	28	20	24	16	16	13.3333	12	12	20	15	32
7.225		8	12	24	4	8	24	16	0	12	8	8	20	8	6.66667	16	16	20	24	16	12	16	16	8	8	8	20	4	28	28	16	16	4	4	4	12	8	0	28	24	16	16	8	13.3333	16	16	12	15	24
7.25		8	4	32	0	8	12	20	0	16	12	12	12	8	6.66667	16	12	16	16	16	12	8	12	12	12	12	8	4	24	20	16	32	4	8	8	12	4	0	16	16	16	16	12	6.66667	16	24	12	15	24
7.275		8	4	24	4	8	24	20	12	12	8	8	8	12	6.66667	16	12	20	8	28	24	8	8	20	8	12	12	8	16	12	20	20	4	12	12	8	4	0	20	12	28	12	12	13.3333	12	16	4	5	16
7.3		8	8	28	4	8	24	20	16	12	12	4	12	12	6.66667	16	8	20	16	16	16	12	8	12	4	12	16	8	24	8	28	12	4	12	4	12	0	8	16	12	24	16	0	20	8	16	12	15	24
7.325		12	8	20	4	8	28	20	12	8	20	8	20	16	6.66667	16	8	12	16	16	20	8	8	8	16	8	12	4	20	16	24	20	4	8	4	16	0	8	20	8	24	20	12	6.66667	12	12	20	15	28
7.35		16	20	16	8	0	36	20	12	0	20	4	16	16	10	16	8	12	12	32	16	16	4	4	20	12	4	4	12	20	20	24	12	12	12	4	0	0	24	16	28	16	16	13.3333	16	16	12	5	24
7.375		16	16	20	8	4	28	16	8	12	20	4	12	8	10	12	4	24	12	20	12	20	16	8	12	12	8	4	24	16	20	20	12	16	12	8	8	0	24	8	16	20	8	20	16	24	12	5	28
7.4		8	8	20	8	8	24	16	8	16	12	4	12	4	6.66667	12	16	24	20	20	20	12	16	16	8	16	16	4	24	24	20	8	16	12	8	16	8	4	24	12	16	12	8	13.3333	16	24	12	0	20
7.425		4	16	28	4	4	28	20	8	16	12	4	8	4	3.33333	12	16	20	20	28	12	12	8	24	8	16	12	4	24	24	12	12	12	12	8	16	4	12	16	24	20	12	12	13.3333	8	16	8	10	20
7.45		8	16	24	8	4	36	24	8	20	12	4	4	4	3.33333	12	8	28	16	20	12	16	12	20	8	16	8	4	24	20	16	16	4	20	4	8	8	8	12	16	16	12	8	6.66667	4	16	8	20	20
7.475		8	12	24	12	8	40	16	8	16	8	8	8	16	10	20	12	24	16	20	12	16	8	4	16	16	8	4	16	24	16	12	12	12	8	0	12	4	20	20	16	16	4	13.3333	8	20	16	15	20
7.5		4	8	24	4	12	28	12	4	24	4	8	8	16	6.66667	16	12	24	12	28	20	16	8	12	16	4	8	4	24	20	12	20	8	4	12	4	20	8	24	20	16	24	8	13.3333	4	16	16	10	24
7.525		4	16	24	4	12	32	12	0	24	8	0	20	4	10	8	8	24	24	20	24	12	8	20	4	8	8	12	24	24	24	16	4	8	4	8	20	8	16	8	20	8	4	13.3333	4	20	8	5	20
7.55		4	16	28	8	4	32	16	0	20	20	0	20	8	13.3333	16	8	20	20	20	16	8	0	16	12	16	4	8	12	20	24	4	8	8	4	4	12	8	16	16	20	4	4	20	8	24	12	0	20
7.575		8	12	24	12	0	32	16	0	20	16	0	8	8	10	12	8	16	12	36	12	4	4	16	12	8	4	0	20	20	24	8	8	8	8	8	12	8	20	24	28	8	4	13.3333	12	16	12	0	32
7.6		12	16	28	8	4	32	12	4	20	4	0	12	4	6.66667	8	8	20	20	28	12	0	8	16	12	12	8	8	20	16	20	16	12	8	8	8	20	8	16	20	32	8	12	13.3333	20	8	16	5	32
7.625		8	12	28	4	4	24	16	8	16	12	4	4	0	3.33333	12	8	24	16	16	20	8	4	20	20	20	8	12	16	16	24	12	12	8	8	12	20	12	16	24	24	16	20	20	12	12	20	10	20
7.65		12	12	28	8	8	28	12	4	24	16	4	12	4	3.33333	16	4	16	12	16	12	16	8	16	16	16	8	8	20	28	24	4	16	12	12	16	16	12	24	16	20	20	24	20	0	20	8	10	24
7.675		8	4	20	4	12	32	4	0	24	16	4	20	4	3.33333	16	8	20	16	8	12	20	8	12	16	12	20	4	20	24	24	8	16	8	16	4	16	12	20	20	24	12	16	26.6667	8	24	12	5	36
7.7		12	8	20	0	8	28	12	4	24	20	4	16	8	13.3333	8	16	16	20	20	24	16	4	16	16	8	24	4	20	16	20	24	4	0	12	4	12	16	24	24	28	8	4	20	8	20	12	5	32
7.725		12	8	32	4	8	32	20	4	24	12	0	16	8	10	24	12	12	16	24	16	4	8	16	8	8	20	4	16	8	12	20	4	0	4	12	8	12	24	20	28	8	8	6.66667	4	12	8	5	20
7.75		16	8	28	12	8	32	8	0	16	16	4	20	0	6.66667	28	8	12	12	16	16	8	4	16	8	12	20	12	12	12	28	16	8	8	8	12	8	4	20	28	24	12	12	13.3333	8	16	8	10	20
7.775		20	8	24	8	12	36	12	0	20	12	4	20	8	13.3333	8	8	12	16	16	16	12	4	12	8	12	12	12	24	12	32	12	16	8	16	12	12	4	28	24	20	24	24	26.6667	12	16	8	15	20
7.8		8	8	24	0	12	32	16	0	20	12	0	16	16	10	8	4	20	28	12	8	12	12	8	8	12	8	4	24	20	24	4	8	12	16	24	16	8	28	8	24	20	16	20	16	16	12	5	24
7.825		8	16	32	0	4	24	20	8	20	12	4	12	16	6.66667	16	4	16	24	16	8	16	8	4	8	12	12	4	20	36	28	8	4	16	20	16	12	8	16	12	20	12	8	20	8	12	4	0	28
7.85		16	8	24	4	4	28	32	12	24	16	8	8	16	10	16	4	16	12	24	16	20	4	8	8	8	8	4	28	32	36	4	12	20	12	8	8	8	20	20	24	16	12	13.3333	16	12	8	0	24
7.875		16	8	16	12	8	36	24	4	20	20	4	16	12	6.66667	12	4	24	16	20	20	16	16	16	12	12	4	8	28	16	20	16	8	20	4	12	16	8	28	24	24	16	8	6.66667	16	20	12	0	24
7.9		8	20	28	12	8	36	16	4	20	16	4	20	8	10	12	4	28	12	16	16	12	20	12	12	16	16	8	28	20	16	24	8	12	12	8	16	8	20	28	16	16	4	13.3333	4	16	8	5	24
7.925		4	16	24	8	20	24	24	4	24	20	12	20	4	13.3333	16	0	24	12	24	16	20	12	16	12	8	16	4	28	32	32	16	8	20	8	4	12	4	20	16	20	12	4	26.6667	4	12	16	5	24
7.95		8	12	20	12	16	36	20	4	24	16	16	20	8	3.33333	16	0	16	12	16	20	20	4	16	16	4	20	8	28	24	28	16	8	24	4	8	8	4	24	8	16	16	4	26.6667	4	16	16	5	28
7.975		12	16	16	16	8	40	12	16	20	12	12	16	16	6.66667	12	4	16	12	20	12	16	0	12	12	12	20	12	20	20	12	20	8	20	8	8	0	4	24	8	16	12	12	13.3333	4	20	12	10	32
8		16	12	12	8	8	32	16	12	16	16	4	8	8	6.66667	12	4	28	24	24	12	12	8	12	8	12	16	4	16	20	12	20	12	8	4	12	4	8	20	8	20	12	16	20	8	20	12	5	36
8.025		12	8	12	8	4	32	12	8	20	16	4	4	4	3.33333	16	8	32	24	16	24	20	8	12	8	4	24	0	12	20	24	16	16	0	20	12	4	16	20	20	16	20	20	20	8	12	8	0	24
8.05		12	12	12	8	8	24	12	12	20	8	4	12	8	10	16	8	20	12	20	20	16	0	12	4	8	12	8	20	24	16	12	4	12	20	20	16	16	16	24	8	20	28	13.3333	0	12	20	5	16
8.075		20	12	24	0	4	28	20	8	20	8	0	12	8	10	16	0	16	20	20	16	16	12	20	4	12	0	12	20	20	16	8	8	12	0	28	20	16	16	28	12	12	12	13.3333	4	20	24	10	24
8.1		16	8	24	8	0	36	16	4	24	12	4	8	8	3.33333	12	8	12	24	20	12	20	12	24	12	8	8	4	8	16	16	8	8	12	4	16	8	8	16	28	20	8	8	20	8	20	16	15	24
8.125		12	4	24	8	0	32	12	0	28	8	12	20	16	0	16	12	16	16	20	8	8	4	8	12	20	16	0	16	12	8	8	0	16	8	8	4	8	16	12	12	8	16	13.3333	8	16	12	10	24
8.15		12	0	28	4	0	32	16	8	20	16	8	20	12	6.66667	24	8	28	16	16	20	12	12	4	8	16	20	0	28	16	4	8	4	16	8	0	0	8	28	20	12	4	12	13.3333	4	16	4	5	24
8.175		12	8	28	4	0	32	12	8	12	16	4	12	0	10	20	8	24	12	16	28	12	12	8	8	4	16	4	16	20	4	16	8	16	16	12	8	8	16	24	16	4	4	33.3333	8	20	12	5	24
8.2		12	16	20	0	4	32	8	4	28	8	4	16	8	6.66667	12	8	20	20	16	24	12	4	16	20	12	12	8	20	16	8	20	8	16	16	16	12	8	8	12	16	16	4	26.6667	12	16	20	5	24
8.225		12	16	20	12	8	28	4	8	28	8	4	16	12	3.33333	12	8	20	16	20	20	12	4	20	24	8	16	8	32	16	20	20	4	16	12	16	12	8	24	20	16	20	4	13.3333	16	16	16	5	24
8.25		8	12	16	12	8	32	8	8	20	16	4	12	8	3.33333	20	8	12	8	24	20	8	8	8	12	8	16	12	24	20	24	20	4	12	8	16	12	8	20	28	20	24	8	13.3333	24	12	20	5	28
8.275		16	8	24	8	8	44	16	4	20	16	0	12	4	10	16	4	16	12	24	12	4	8	4	8	12	8	8	24	24	16	12	16	12	4	8	8	12	12	24	12	24	12	20	12	16	16	5	24
8.3		12	12	28	20	4	40	16	8	16	12	8	20	12	13.3333	8	4	24	12	16	8	12	8	8	12	8	4	8	12	24	24	8	12	8	8	8	4	12	24	20	8	12	8	20	4	20	8	0	12
8.325		4	16	20	12	8	36	16	12	20	16	12	20	28	6.66667	12	4	16	20	24	16	16	8	8	16	4	16	12	12	24	28	12	4	12	12	12	8	4	28	28	12	8	8	20	8	16	8	0	24
8.35		8	8	24	8	12	36	16	4	16	12	8	12	20	3.33333	12	4	12	12	24	20	4	8	12	8	4	16	4	24	12	20	16	12	12	12	8	8	4	20	28	12	12	4	26.6667	8	16	8	5	32
8.375		12	8	20	16	4	32	16	0	12	8	8	12	12	10	16	16	20	12	16	24	8	4	16	4	12	16	4	24	8	20	16	20	8	12	8	16	12	16	16	12	16	8	20	12	12	8	5	24
8.4		12	16	24	12	4	32	20	4	20	4	4	20	8	6.66667	16	16	28	16	16	24	12	8	12	12	12	24	16	24	16	16	12	8	16	16	12	16	8	20	20	8	20	12	13.3333	12	8	16	5	24
8.425		12	16	32	8	4	32	16	4	20	12	0	20	4	3.33333	8	4	24	8	8	20	12	8	12	8	8	12	16	28	24	12	16	4	16	20	16	16	0	16	16	16	16	12	20	12	20	16	10	24
8.45		12	12	36	8	4	32	8	4	12	20	8	12	12	10	12	8	24	12	12	20	12	0	12	4	8	4	8	24	24	16	16	8	12	16	20	16	12	16	16	20	8	16	26.6667	16	20	12	20	24
8.475		4	12	32	8	4	32	16	12	16	12	8	8	16	13.3333	12	16	24	8	16	20	8	8	16	12	4	12	4	16	20	16	16	8	16	8	20	8	16	28	16	20	12	16	20	16	12	12	15	20
8.5		8	8	12	4	4	32	24	8	28	8	8	8	12	6.66667	8	12	16	12	12	20	24	12	20	12	8	12	8	24	24	16	24	8	16	8	16	12	8	16	16	20	12	8	20	16	16	12	0	24
8.525		12	12	16	0	8	28	24	4	16	8	8	12	16	3.33333	8	8	12	20	20	16	24	12	12	8	8	4	8	32	28	16	16	4	16	12	12	8	4	16	16	12	8	8	26.6667	12	16	8	10	24
8.55		12	12	32	4	12	36	20	8	16	16	4	8	20	10	16	12	20	16	24	16	4	8	12	8	12	16	4	24	24	28	12	0	8	12	12	8	0	20	12	16	12	12	20	12	16	8	10	24
8.575		16	4	24	4	8	36	20	8	20	24	4	8	16	10	28	8	28	16	20	16	4	4	12	12	12	20	4	24	20	24	12	4	12	4	8	12	4	16	12	12	20	12	13.3333	20	16	8	0	36
8.6		8	8	20	12	4	28	16	12	20	20	8	20	8	6.66667	28	12	24	16	20	8	4	8	12	12	4	12	4	16	20	8	12	12	16	8	8	20	4	28	12	8	20	12	20	16	20	8	0	32
8.625		4	12	28	12	4	36	12	8	28	20	8	20	8	10	28	12	24	16	12	12	4	8	16	12	12	12	8	20	12	16	20	12	8	16	12	16	0	28	16	24	12	4	26.6667	8	16	20	5	24
8.65		8	16	28	12	0	36	12	4	20	12	4	16	12	10	16	4	24	8	12	8	16	12	12	16	12	12	8	36	12	28	24	8	4	12	16	8	8	20	16	20	4	0	6.66667	12	16	28	5	32
8.675		12	16	24	12	8	36	16	8	8	8	8	12	8	10	12	12	20	16	12	16	20	12	8	8	4	20	4	32	12	36	12	4	4	8	20	16	12	16	16	12	0	4	6.66667	4	20	16	5	20
8.7		8	4	24	4	8	28	16	4	8	16	4	16	8	6.66667	16	12	20	20	12	32	12	4	8	4	0	12	4	16	16	28	16	12	12	12	20	16	12	12	20	16	4	8	13.3333	4	24	4	5	24
8.725		8	4	20	8	4	28	12	8	16	20	4	16	8	3.33333	20	12	28	8	16	20	12	12	8	8	8	16	4	4	20	16	16	16	8	8	16	4	4	16	24	16	8	4	20	12	20	12	15	28
8.75		12	12	24	8	4	36	16	12	20	16	8	20	8	3.33333	16	8	24	12	12	12	8	12	12	8	12	28	4	20	24	16	16	8	8	12	20	8	0	20	20	16	8	8	26.6667	12	8	8	15	24
8.775		8	8	28	4	8	36	12	4	16	8	8	16	16	3.33333	8	0	20	20	20	20	8	0	12	12	12	20	12	32	20	12	20	16	12	20	16	12	0	24	20	20	12	16	26.6667	8	8	4	0	20
8.8		8	8	24	0	12	36	16	0	8	12	16	12	12	6.66667	12	4	24	20	32	24	16	4	8	16	16	12	12	20	16	12	12	16	8	12	8	12	0	28	24	24	12	12	26.6667	20	16	12	0	24
8.825		16	20	24	8	4	24	16	8	16	16	16	12	12	3.33333	8	12	20	20	24	12	8	8	16	12	20	4	8	20	32	16	12	8	16	8	4	12	4	24	20	16	12	12	26.6667	16	20	20	0	32
8.85		12	12	24	12	0	32	16	12	24	20	12	8	12	6.66667	8	12	20	20	24	16	12	8	12	8	12	8	16	20	20	16	16	8	20	8	8	12	8	28	16	16	12	16	13.3333	8	16	20	0	24
8.875		12	8	20	8	0	36	20	8	20	16	8	12	4	10	16	8	24	16	24	24	12	8	4	16	0	8	16	20	12	16	16	12	24	8	20	12	8	24	16	16	12	8	13.3333	16	12	20	0	28
8.9		16	16	24	4	0	32	16	4	20	16	4	8	8	3.33333	12	4	20	12	20	28	0	4	12	16	8	12	16	28	16	24	12	12	16	12	16	16	4	20	16	24	20	0	20	16	16	16	0	32
8.925		12	8	36	8	8	36	16	0	20	16	16	8	4	3.33333	8	0	16	8	20	28	4	8	12	16	12	12	16	24	20	24	16	16	8	8	12	12	4	24	12	24	12	0	20	12	20	12	10	28
8.95		12	4	24	12	8	28	16	8	20	8	12	12	8	3.33333	16	4	20	16	12	12	8	8	16	12	8	8	8	20	20	16	12	16	20	12	12	4	8	20	16	24	20	8	26.6667	4	16	16	15	20
8.975		8	8	24	16	0	32	16	12	12	8	4	16	12	6.66667	16	4	20	16	16	16	12	0	24	0	20	16	8	20	12	24	12	8	16	12	8	8	12	12	28	20	28	16	26.6667	4	20	12	15	24
9		12	16	24	16	0	36	16	4	12	12	4	16	12	6.66667	8	8	24	12	16	20	12	0	20	4	16	16	8	24	16	24	16	12	8	4	8	8	16	16	20	16	8	16	20	12	16	12	15	32
9.025		16	20	20	8	4	32	20	0	24	20	0	20	12	3.33333	8	8	20	20	12	16	12	8	16	8	8	8	4	24	16	16	20	12	8	16	8	4	12	24	16	28	8	20	13.3333	12	4	8	10	32
9.05		12	8	28	4	4	28	20	0	28	16	8	20	4	3.33333	16	4	24	12	24	16	12	12	16	16	8	12	8	24	24	16	20	4	8	12	4	16	8	24	16	24	20	12	20	16	12	4	5	32
9.075		8	4	28	4	0	32	20	4	24	16	8	20	4	0	16	4	36	12	24	12	16	12	24	12	12	12	8	24	28	24	24	4	4	8	8	20	16	24	16	24	16	8	20	20	16	16	0	24
9.1		20	8	24	4	8	44	24	8	20	12	4	24	4	3.33333	12	0	20	20	24	12	16	8	20	4	16	0	0	28	16	28	16	8	8	24	12	12	12	24	16	20	16	8	13.3333	16	4	16	0	20
9.125		20	8	16	4	12	32	20	4	16	8	4	20	4	6.66667	12	0	12	12	24	8	8	4	16	8	4	0	4	24	12	28	8	8	20	24	16	20	8	20	12	16	16	0	13.3333	20	16	16	10	28
9.15		12	12	24	16	8	28	8	8	16	12	12	20	12	10	4	4	16	16	20	12	4	8	16	20	0	8	12	12	16	28	24	12	16	8	16	16	8	24	16	16	8	8	20	12	24	20	15	28
9.175		8	16	36	16	12	40	8	12	16	16	16	20	16	13.3333	16	8	24	12	20	12	16	4	16	20	8	16	12	24	24	16	20	16	8	0	8	4	16	20	12	20	20	12	33.3333	0	12	12	10	28
9.2		8	20	28	8	20	32	12	4	24	16	4	16	8	13.3333	20	4	20	16	12	12	20	0	16	16	12	20	4	32	20	12	12	8	16	12	20	8	16	12	8	24	20	4	20	4	16	20	5	20
9.225		16	16	32	8	12	32	8	8	16	12	4	20	8	10	16	0	20	28	20	20	12	0	16	20	8	16	8	28	16	24	20	4	20	12	16	8	4	20	12	28	16	8	13.3333	8	20	24	10	16
9.25		12	4	36	4	8	36	16	8	16	16	12	16	12	6.66667	16	8	12	20	24	16	12	8	20	8	8	16	8	28	24	24	16	8	16	0	0	8	8	20	24	24	20	24	20	8	8	16	15	28
9.275		12	8	20	12	8	28	24	4	24	8	8	16	8	3.33333	8	8	12	12	24	16	4	16	16	0	4	16	8	20	24	20	16	4	16	8	16	20	8	20	24	16	8	20	13.3333	4	12	16	5	36
9.3		12	8	20	16	0	24	20	8	16	8	8	24	12	6.66667	12	4	16	16	20	24	0	12	20	4	0	12	8	20	20	24	16	4	12	12	20	12	4	20	20	24	4	12	13.3333	4	20	12	0	36
9.325		12	12	24	8	0	36	8	8	24	12	8	20	12	10	16	8	16	24	12	20	8	12	16	8	8	12	4	24	20	16	16	8	12	4	8	12	4	20	16	24	4	12	13.3333	8	16	12	5	28
9.35		8	12	28	8	0	36	4	4	24	8	4	16	4	6.66667	20	12	24	20	20	16	24	8	8	12	8	8	12	20	16	24	16	12	12	8	4	12	12	20	20	16	8	8	13.3333	4	12	12	5	28
9.375		12	0	28	8	4	32	8	8	16	16	8	16	0	6.66667	20	8	20	16	28	12	16	0	8	8	0	16	12	16	20	20	16	12	4	8	12	8	12	16	20	24	16	16	20	4	8	12	5	32
9.4		20	4	24	8	4	40	16	8	20	20	4	20	12	6.66667	12	8	16	12	24	12	20	4	20	8	8	28	4	24	24	16	12	12	12	4	16	12	12	20	16	28	16	20	20	4	12	16	5	24
9.425		16	8	28	12	4	28	24	0	20	12	4	16	16	6.66667	12	12	20	16	16	20	24	12	24	16	12	16	4	28	16	20	16	8	20	12	12	8	12	24	24	24	8	16	26.6667	8	12	20	0	24
9.45		16	12	24	16	8	28	16	0	20	8	8	12	8	6.66667	12	4	20	20	16	28	8	16	16	8	12	16	16	24	20	8	12	0	12	8	12	12	8	16	12	24	8	20	20	20	16	20	5	24
9.475		16	12	28	12	4	24	12	0	20	8	12	12	12	3.33333	8	8	16	20	16	20	20	12	16	8	8	24	12	20	24	8	16	0	12	8	8	12	8	16	8	20	20	24	13.3333	16	16	16	10	24
9.5		16	4	28	12	0	24	28	0	16	4	12	12	8	3.33333	8	12	20	20	24	16	20	12	16	12	4	12	4	24	20	24	32	0	16	20	4	8	8	24	24	16	16	20	20	8	8	16	5	16
9.525		12	4	20	8	0	32	32	0	16	4	20	12	0	3.33333	8	4	28	16	20	20	16	12	20	8	4	8	8	28	20	32	16	0	12	12	12	4	8	20	32	24	8	16	20	4	20	16	0	20
9.55		12	8	16	0	4	28	16	0	16	4	16	16	4	6.66667	16	0	28	12	12	20	16	4	16	4	8	16	4	28	20	20	12	4	8	4	16	4	8	20	20	28	8	16	33.3333	4	20	8	0	36
9.575		8	12	24	4	8	36	8	4	16	12	0	12	4	6.66667	20	4	24	12	16	24	8	12	12	0	8	20	4	24	16	16	12	8	4	8	8	12	4	24	12	24	16	16	26.6667	4	16	4	5	24
9.6		8	12	20	4	4	32	16	8	20	16	8	8	12	0	16	4	24	16	12	20	12	16	20	8	0	16	8	16	16	20	12	4	12	4	8	16	4	24	12	20	16	12	13.3333	4	8	12	10	24
9.625		8	8	16	4	8	24	20	8	16	8	8	12	24	6.66667	20	4	20	12	20	16	16	8	12	12	8	16	4	24	20	12	20	0	12	4	8	12	12	24	8	16	16	16	13.3333	12	16	20	10	28
9.65		12	8	24	4	12	24	16	4	20	16	8	4	12	10	16	4	16	16	28	12	12	8	8	16	16	8	4	36	16	16	12	4	8	12	12	20	8	16	12	20	16	16	13.3333	8	24	24	10	32
9.675		12	8	20	8	4	28	12	12	20	20	8	12	8	6.66667	12	0	20	20	12	16	16	12	12	12	16	4	4	24	20	20	12	8	8	12	12	20	4	16	16	20	8	4	13.3333	8	20	24	5	36
9.7		4	8	24	8	8	28	16	12	12	12	0	12	8	13.3333	12	0	20	12	20	24	12	8	12	8	12	12	4	12	24	20	20	8	4	4	8	12	4	24	16	24	20	8	13.3333	12	20	12	5	28
9.725		8	8	24	4	16	28	28	8	20	12	4	16	8	10	8	4	20	8	24	20	8	4	16	8	4	12	8	20	12	24	28	12	8	8	8	20	4	24	16	24	20	8	6.66667	12	16	8	10	20
9.75		8	12	24	12	8	28	24	12	16	12	12	16	12	10	20	4	24	16	16	24	16	4	16	4	8	16	12	24	12	24	24	20	12	16	8	20	4	24	20	28	16	8	0	8	16	8	5	28
9.775		12	16	24	12	4	32	20	12	16	4	16	12	4	10	20	0	24	12	20	20	12	4	24	8	8	24	8	24	12	24	16	16	20	8	12	16	0	16	20	28	24	24	6.66667	8	12	4	10	36
9.8		16	12	16	16	4	36	16	12	16	12	16	16	8	3.33333	8	0	24	12	20	12	8	12	24	20	4	12	4	32	24	12	12	8	16	16	20	8	4	16	20	20	16	24	20	16	16	12	10	20
9.825		8	4	20	16	4	32	12	8	8	24	16	12	16	6.66667	12	8	16	16	24	12	12	16	24	20	4	4	8	32	28	16	12	8	8	20	16	16	4	24	16	20	12	12	13.3333	12	20	16	5	24
9.85		16	0	20	8	4	40	12	4	8	16	8	16	12	3.33333	12	16	20	12	28	16	8	12	20	8	0	12	4	24	16	28	8	12	4	12	8	16	0	20	16	16	12	12	20	8	8	16	20	32
9.875		16	8	12	20	0	32	12	0	8	8	4	16	16	0	16	12	28	20	24	24	12	4	4	8	0	12	0	28	8	28	4	16	8	16	16	12	4	20	28	16	20	12	26.6667	8	12	12	15	28
9.9		12	20	16	20	0	24	12	8	12	12	12	12	12	10	16	4	28	16	20	24	12	16	8	16	8	12	0	24	20	24	20	12	16	20	16	16	4	20	20	16	20	12	26.6667	16	28	12	5	24
9.925		20	16	16	4	4	32	24	16	16	20	8	8	12	13.3333	16	8	16	12	16	20	4	20	20	12	12	16	4	20	20	16	24	8	16	16	12	8	0	24	16	16	16	16	20	16	16	16	10	28
9.95		16	4	16	8	8	32	32	12	16	12	0	8	16	3.33333	16	16	12	12	16	24	16	8	20	4	4	20	8	28	4	20	12	8	20	8	12	8	4	20	24	20	16	16	13.3333	8	16	16	10	32
pb1a, firing rate (Hz)
exposure cond.	2-butanone
n		6						9									9									9									10										10
stimulus, 2-butanone (log[conc.])		solvent (0)	solvent (0)	solvent (0)	solvent (0)	solvent (0)	solvent (0)	-10	-10	-10	-10	-10	-10	-10	-10	-10	-9	-9	-9	-9	-9	-9	-9	-9	-9	-8	-8	-8	-8	-8	-8	-8	-8	-8	-7	-7	-7	-7	-7	-7	-7	-7	-7	-7	-6	-6	-6	-6	-6
time (s)
1.025		20	24	32	8	8	32	12	12	16	4	8	16	0	12	8	4	24	20	0	24	16	4	20	4	0	20	12	12	20	12	0	8	8	8	20	16	12	16	36	4	12	12	8	8	4	20	8	20
1.05		20	20	12	16	16	16	4	16	12	4	12	16	0	8	4	4	16	16	0	16	20	4	20	4	0	16	8	8	20	16	8	8	8	8	16	12	8	8	40	8	4	8	12	0	12	28	16	16
1.075		12	12	8	12	8	12	12	16	20	4	16	16	4	12	4	16	16	8	0	12	20	8	24	4	4	16	16	4	20	24	12	20	8	8	8	16	4	12	40	8	4	12	16	4	8	16	16	16
1.1		12	20	8	4	8	16	16	12	16	4	8	20	4	12	8	16	20	12	8	12	24	8	20	0	4	16	16	4	20	24	4	12	8	12	4	20	4	16	40	0	8	12	16	8	4	16	20	16
1.125		8	16	8	12	8	32	4	12	8	8	0	16	4	12	4	16	12	4	8	8	28	4	12	4	0	16	20	4	20	16	4	8	12	12	8	20	8	20	32	4	12	8	8	4	8	16	12	20
1.15		8	16	4	12	8	32	0	16	4	12	4	16	4	20	8	12	16	12	4	16	24	8	16	8	4	12	20	4	24	12	8	20	12	8	16	20	12	20	32	4	8	20	4	0	4	20	8	16
1.175		12	20	4	8	20	16	8	12	12	4	12	12	0	16	8	8	16	20	8	8	16	8	8	12	8	12	12	8	28	16	8	16	12	8	12	28	8	12	40	12	8	12	12	8	4	20	16	20
1.2		12	24	20	8	12	24	12	12	20	4	8	12	4	12	0	8	12	12	4	4	20	4	12	8	8	8	20	12	24	16	4	8	8	4	16	24	12	12	40	20	12	0	12	8	20	20	8	16
1.225		12	24	28	12	4	28	8	24	12	8	4	20	8	16	4	4	4	12	4	16	28	4	16	4	4	8	24	8	28	24	0	12	4	8	16	24	8	16	40	8	16	4	4	8	20	28	8	16
1.25		4	16	16	16	12	24	4	24	8	8	8	16	8	12	4	8	8	20	4	16	24	8	12	8	4	8	20	8	16	16	0	16	8	12	8	28	4	16	40	8	16	8	4	12	8	20	12	20
1.275		12	20	16	12	12	20	4	16	4	8	8	20	8	4	4	8	12	24	4	4	24	12	8	4	4	4	24	8	16	16	0	16	12	12	16	16	4	16	44	8	16	8	4	16	4	16	8	12
1.3		16	20	16	8	16	24	8	8	8	8	8	20	12	12	4	8	16	32	4	12	32	8	4	0	4	8	24	4	28	16	0	12	12	16	20	20	8	16	32	0	20	4	8	16	4	16	12	12
1.325		12	16	12	4	12	36	4	16	12	4	16	8	8	12	8	8	16	28	0	12	20	4	4	0	4	8	16	4	28	8	12	8	4	8	16	20	8	16	24	0	12	4	16	8	8	16	16	24
1.35		12	16	12	0	0	40	8	24	16	4	20	16	4	4	16	8	16	20	8	8	20	8	12	8	8	20	20	4	24	16	12	20	8	0	16	16	4	20	24	4	16	8	20	8	8	12	12	16
1.375		12	12	20	4	4	32	8	16	24	4	12	16	4	4	16	4	20	20	12	12	28	12	12	16	12	24	24	8	20	16	0	24	12	8	16	24	16	16	24	4	16	8	16	4	4	12	4	8
1.4		20	16	28	8	8	28	0	12	20	12	8	12	4	8	12	4	12	12	8	12	20	8	8	12	8	28	16	8	20	16	4	20	12	12	8	20	20	20	36	8	12	12	4	0	8	20	4	16
1.425		16	20	24	4	12	28	8	20	16	16	8	20	8	12	8	4	8	12	4	12	20	4	16	8	4	24	20	4	20	28	12	20	12	8	12	20	16	28	36	12	24	12	0	4	12	12	4	24
1.45		4	16	24	4	12	28	12	16	16	12	8	16	4	12	4	4	16	28	4	12	16	4	16	4	0	8	20	8	20	24	12	20	8	8	12	16	12	28	40	4	24	4	8	8	12	8	8	24
1.475		4	24	16	8	8	24	4	20	16	12	8	12	12	8	0	8	20	28	8	12	16	8	16	12	4	16	24	8	20	16	8	16	12	8	16	12	12	28	32	4	20	12	16	8	8	20	16	20
1.5		8	24	8	8	12	16	8	24	16	4	8	16	12	8	4	16	16	16	4	12	32	8	16	16	4	16	20	4	20	16	8	4	12	8	16	16	8	16	32	12	24	12	8	8	4	24	12	16
1.525		12	24	12	8	12	24	12	20	20	12	8	16	4	8	8	12	12	16	8	8	40	8	16	12	0	16	8	0	20	20	16	12	8	16	12	12	4	16	40	8	20	0	4	4	8	20	16	16
1.55		8	20	12	12	4	28	4	24	24	12	12	16	4	8	4	4	20	20	12	4	20	16	8	16	4	16	28	12	12	24	16	20	4	12	8	20	12	20	24	0	12	0	8	4	8	24	16	20
1.575		12	20	12	8	12	24	4	16	24	8	16	20	8	4	0	0	20	16	4	16	12	12	0	12	12	12	36	16	8	20	8	12	12	0	12	24	16	28	24	4	12	0	12	4	8	28	12	20
1.6		12	16	12	8	20	24	4	16	24	12	16	24	8	12	8	4	12	24	0	20	16	4	8	16	12	20	28	4	12	20	12	16	16	4	16	16	12	24	36	8	24	8	20	8	16	20	12	24
1.625		4	12	12	16	16	16	0	20	24	8	12	20	4	16	12	4	12	32	20	16	16	8	16	12	8	12	28	0	24	24	12	28	12	4	4	16	4	12	40	8	16	8	16	16	16	20	8	24
1.65		8	20	16	8	12	28	0	12	16	4	16	20	12	16	4	0	20	24	20	20	24	8	20	4	8	8	24	4	20	36	8	20	8	4	4	20	8	24	36	8	8	4	12	16	4	16	12	12
1.675		4	24	12	8	8	32	4	12	16	4	16	20	8	24	4	4	24	32	4	16	24	4	20	12	8	20	24	4	20	20	12	8	8	4	8	24	20	16	36	12	16	4	12	8	12	12	16	16
1.7		4	24	12	16	8	20	8	20	16	8	12	20	12	12	8	4	24	28	8	16	16	4	16	12	8	20	24	8	24	16	16	8	16	8	8	16	12	12	24	8	12	0	12	8	16	24	12	20
1.725		8	32	12	12	8	20	12	24	4	8	16	24	16	4	8	4	12	28	4	16	12	4	12	4	4	16	16	8	16	24	12	12	8	12	4	16	12	20	24	12	20	4	16	12	8	20	12	16
1.75		4	28	8	8	12	16	12	16	8	12	12	16	8	8	4	8	4	28	4	16	24	12	12	4	0	8	8	4	12	16	8	12	0	4	8	12	12	16	40	16	20	8	8	8	24	12	12	16
1.775		0	12	16	16	20	24	12	20	16	12	12	16	8	8	8	8	8	16	12	20	24	16	20	4	4	8	8	12	20	20	4	8	4	0	12	16	8	12	32	12	12	4	8	8	20	12	12	12
1.8		8	20	20	20	16	32	12	24	16	12	20	24	8	8	8	12	12	20	8	12	16	12	16	8	12	12	24	8	20	16	4	8	16	4	20	24	12	16	28	20	16	8	12	4	4	20	16	20
1.825		12	20	20	12	8	28	8	20	20	16	20	16	4	8	4	8	12	32	4	16	16	8	8	8	16	20	20	4	12	12	4	16	24	4	16	16	8	20	24	12	16	12	8	0	8	20	12	28
1.85		12	16	20	8	8	24	8	12	24	8	20	20	0	8	8	0	8	24	12	12	16	8	8	4	8	20	16	12	20	16	8	24	16	8	12	12	20	12	24	8	16	8	12	4	12	16	12	16
1.875		12	20	16	12	8	16	8	8	20	8	12	12	0	4	12	8	8	12	12	12	20	12	12	8	0	16	16	8	16	20	12	24	12	8	20	8	20	16	36	20	16	12	8	12	12	20	8	16
1.9		8	16	20	12	8	20	8	8	16	8	4	16	12	4	8	8	12	20	4	12	16	4	16	8	4	16	8	4	12	12	8	24	12	8	12	12	4	12	36	16	16	12	8	8	4	16	0	20
1.925		12	12	16	16	12	28	8	8	8	8	20	24	16	8	8	4	20	24	0	12	16	8	12	8	8	12	12	8	20	8	12	24	12	8	12	16	8	20	36	4	28	8	8	12	4	16	4	16
1.95		16	12	8	16	20	24	8	20	12	16	24	16	4	8	8	8	20	20	0	24	20	8	12	4	8	16	24	12	16	12	8	12	8	4	12	16	16	28	36	8	28	4	8	12	8	16	4	16
1.975		8	8	4	8	12	24	12	20	20	16	16	16	8	8	0	4	8	20	0	20	28	8	12	8	8	20	28	12	16	16	4	8	4	4	12	20	8	12	32	8	16	0	8	0	4	12	0	28
2		4	12	8	8	8	24	12	20	16	12	16	12	8	8	8	0	12	16	0	16	24	20	16	8	12	16	32	16	16	24	4	12	12	0	8	16	8	16	32	4	12	0	4	8	8	12	4	24
2.025		12	20	16	12	20	24	8	24	16	4	12	16	0	8	16	0	20	16	0	16	24	12	28	4	8	12	20	16	16	20	0	16	12	4	12	12	16	20	28	4	20	12	8	12	12	8	8	20
2.05		12	20	16	16	12	24	8	20	20	8	12	20	0	16	8	4	12	8	0	16	28	8	28	8	0	12	16	8	24	12	0	20	8	12	12	8	8	20	24	12	28	16	8	12	4	12	4	24
2.075		4	20	12	12	4	20	4	12	20	12	16	16	4	16	4	4	16	8	0	16	20	16	16	8	8	16	24	4	20	16	0	16	8	8	0	8	4	20	24	12	20	4	8	8	4	16	4	16
2.1		8	12	12	4	8	24	20	20	12	12	12	24	8	12	8	4	16	20	8	16	24	12	8	4	16	20	12	12	20	16	4	28	12	0	0	20	8	12	28	4	24	4	12	12	8	16	4	20
2.125		8	16	12	0	4	24	20	24	8	12	20	24	4	12	12	8	16	24	8	8	24	12	20	12	8	20	4	16	24	8	8	20	8	4	8	24	8	16	32	8	28	8	8	12	4	16	4	16
2.15		4	28	4	8	4	20	4	16	16	8	16	20	8	8	8	8	20	20	8	8	24	4	16	16	8	12	12	12	28	12	8	16	8	4	16	20	4	20	32	4	24	8	8	8	4	4	8	16
2.175		8	20	12	16	8	28	12	12	24	4	16	16	16	12	0	4	8	20	8	16	28	0	8	16	8	20	20	16	20	12	4	24	12	4	12	16	0	20	36	0	28	12	8	12	8	16	8	20
2.2		8	16	12	12	4	28	8	12	16	0	20	8	8	12	8	8	12	24	4	16	24	0	12	12	8	16	20	8	12	12	8	12	16	8	4	24	4	28	44	8	24	12	4	8	8	28	8	16
2.225		4	20	8	12	4	20	4	12	16	8	16	16	8	8	8	16	12	24	4	8	20	4	12	4	12	8	16	4	12	12	8	12	16	8	8	20	12	20	24	12	16	8	12	4	8	20	4	16
2.25		16	16	8	12	12	28	4	16	16	16	24	20	8	8	8	8	8	32	0	8	24	4	16	16	8	20	12	4	16	8	0	12	8	4	16	8	8	12	12	12	20	8	8	0	4	16	12	8
2.275		24	16	8	12	12	36	8	24	20	12	20	16	0	12	12	4	16	28	12	12	16	8	12	16	8	28	8	4	20	12	8	8	12	0	12	8	4	16	28	8	16	4	4	8	4	12	16	16
2.3		12	16	12	20	12	24	16	20	24	12	16	24	0	8	4	12	20	20	12	12	16	12	12	8	4	16	16	8	12	16	8	12	8	0	8	8	4	16	28	0	12	0	4	8	4	20	4	24
2.325		8	20	8	20	12	16	8	24	16	12	12	24	4	0	12	12	16	16	8	12	24	4	12	12	0	4	20	8	16	8	8	12	0	0	16	20	4	12	28	4	20	8	0	4	12	24	4	16
2.35		8	24	8	12	4	20	4	24	12	8	20	20	4	8	12	4	12	16	16	8	24	8	16	12	8	16	24	12	24	12	12	16	0	8	16	36	8	16	28	8	12	8	4	12	20	24	8	20
2.375		12	16	12	8	4	16	8	16	12	12	20	20	0	12	4	4	20	20	8	16	20	12	20	8	16	20	28	8	20	16	8	12	0	8	16	32	12	24	24	8	16	0	4	16	8	28	4	12
2.4		16	20	16	8	4	20	8	12	12	12	8	24	4	16	8	4	16	24	8	12	16	8	16	8	12	24	24	8	12	12	12	12	0	4	16	28	8	16	32	12	32	8	8	8	8	20	8	12
2.425		16	20	20	4	8	32	8	12	16	8	12	20	4	16	8	4	20	16	8	16	24	12	16	8	4	24	28	8	24	16	8	20	0	4	12	24	12	8	36	8	28	8	12	8	16	16	20	20
2.45		8	16	16	0	8	36	8	8	24	12	16	16	8	8	8	4	24	20	4	24	16	12	16	4	8	12	20	12	20	12	4	12	12	4	16	8	20	16	24	8	16	0	12	8	12	16	20	12
2.475		4	20	4	8	8	32	8	12	12	12	12	24	8	12	12	4	16	20	8	12	16	4	16	4	12	8	12	20	16	12	8	8	16	8	8	16	16	24	28	8	12	0	12	4	4	20	12	8
2.5		12	20	8	12	8	24	8	28	12	4	16	24	0	16	12	4	32	4	8	12	20	8	12	12	4	12	20	8	24	16	8	4	4	4	8	24	16	16	32	4	16	4	8	8	12	28	8	16
2.525		12	12	20	16	8	32	12	24	20	12	16	24	4	16	8	0	32	20	8	8	24	24	16	8	4	16	16	4	20	16	8	8	4	12	20	20	8	16	32	12	20	4	8	8	20	24	20	24
2.55		12	12	20	16	12	28	12	20	16	8	8	16	12	8	4	8	8	28	8	0	36	20	20	4	8	16	12	8	20	12	8	12	8	12	16	16	4	20	28	12	16	8	16	8	12	20	20	20
2.575		8	20	16	12	4	24	8	24	12	12	4	20	8	0	4	12	16	20	8	8	28	16	20	4	4	16	12	4	24	16	8	20	12	0	12	16	12	20	16	12	8	20	12	8	12	12	16	20
2.6		8	24	8	12	4	28	4	16	8	24	8	24	4	0	12	4	16	24	8	16	28	16	16	4	8	16	12	4	16	24	16	16	16	8	20	24	16	20	32	12	20	12	4	12	12	12	20	16
2.625		8	28	0	4	8	32	4	20	16	24	8	16	4	0	12	4	8	24	4	16	24	4	4	12	20	20	12	4	8	16	12	16	8	8	12	24	12	24	36	8	16	0	4	12	12	16	12	16
2.65		8	20	4	0	8	28	8	24	20	16	12	16	4	0	8	12	12	16	0	12	24	4	12	12	16	24	12	8	20	12	4	20	12	0	4	20	8	20	32	4	16	0	4	8	16	12	12	16
2.675		12	24	20	8	8	24	4	12	8	8	16	20	16	0	4	12	20	20	4	12	32	12	16	4	12	8	16	8	20	20	8	16	16	4	12	28	8	16	36	8	20	4	8	4	8	8	12	4
2.7		12	28	24	12	8	24	4	12	0	4	12	28	12	4	8	4	20	24	8	12	24	8	20	4	8	8	28	4	8	16	12	16	8	4	12	24	4	20	36	12	16	8	4	0	4	8	12	4
2.725		16	16	16	4	4	20	4	12	4	0	8	24	0	16	12	0	16	16	8	24	20	4	16	4	0	16	28	8	20	24	12	12	16	0	12	24	4	20	32	4	16	4	8	4	12	20	8	16
2.75		12	8	12	12	8	28	0	12	4	4	0	24	0	20	4	0	16	12	12	24	24	8	4	4	4	8	20	12	24	24	16	24	16	4	16	20	12	24	28	4	12	4	12	12	20	16	4	20
2.775		8	16	16	16	16	28	4	12	12	12	8	24	8	16	8	12	20	12	8	8	28	4	8	4	4	12	20	16	16	24	16	20	16	8	16	20	8	16	28	8	20	8	8	16	20	8	12	16
2.8		4	24	16	8	12	24	12	12	12	12	16	12	12	12	20	12	24	16	0	8	20	4	8	0	8	20	12	16	8	28	12	8	12	8	8	20	4	8	24	4	20	4	12	16	12	12	16	16
2.825		8	20	20	8	8	24	12	16	4	4	20	16	8	8	12	0	32	12	16	16	24	12	16	12	12	16	12	12	8	20	12	12	12	8	8	20	12	16	28	4	20	4	8	12	12	20	8	12
2.85		12	20	20	8	12	20	8	16	12	0	24	20	8	12	12	4	20	24	16	16	24	16	16	12	12	12	16	8	20	20	4	12	16	4	12	20	8	16	32	4	20	8	8	8	8	24	4	24
2.875		12	20	8	8	8	24	8	20	20	0	16	20	8	16	16	4	4	32	8	4	24	12	12	4	8	16	12	4	20	12	8	16	12	4	8	8	4	16	32	4	4	8	8	12	4	20	12	28
2.9		12	20	8	8	8	20	4	20	16	0	8	28	12	8	16	8	8	20	12	0	24	12	16	8	4	16	4	8	20	28	12	16	16	4	8	16	4	16	32	12	4	12	8	8	4	20	12	12
2.925		12	20	16	8	8	12	0	20	16	0	12	20	12	8	12	8	16	24	4	12	12	8	16	4	8	16	12	12	12	24	12	12	12	8	12	16	8	12	32	8	8	12	12	4	4	20	12	16
2.95		16	20	16	12	0	20	0	16	24	8	16	12	4	8	8	4	16	24	0	12	16	8	16	4	4	8	12	12	8	20	20	16	12	16	20	8	16	20	28	0	12	4	8	4	12	12	12	24
2.975		16	24	12	12	8	16	4	12	20	12	8	16	4	12	12	8	16	16	8	4	20	8	12	4	4	4	16	8	28	32	16	12	12	16	24	12	12	24	32	0	16	4	16	0	12	12	12	20
3		12	16	24	12	8	16	8	20	12	4	12	20	4	16	4	12	20	20	8	4	12	8	8	0	12	16	24	0	24	16	8	16	12	20	16	16	8	24	32	12	24	12	16	4	20	16	12	20
3.025		8	16	28	12	8	16	8	20	16	8	16	24	4	8	4	12	8	16	8	8	12	8	4	0	16	16	24	8	8	12	12	20	12	8	8	12	8	16	28	12	20	12	4	12	16	24	8	16
3.05		12	24	24	12	8	12	4	12	20	12	16	20	4	8	4	4	8	8	12	20	12	4	12	0	16	12	32	12	12	16	12	16	4	8	12	8	12	12	32	0	12	8	0	16	8	28	8	20
3.075		12	16	20	8	0	20	4	12	16	8	16	24	0	8	4	0	12	20	8	16	16	8	12	4	16	16	24	4	16	24	4	16	12	16	12	8	8	16	40	4	24	4	12	12	16	24	12	20
3.1		4	16	16	0	0	20	8	16	12	8	12	24	0	16	4	0	12	32	8	8	24	4	4	4	12	12	16	16	16	28	4	16	12	12	12	8	0	16	36	8	28	4	12	8	12	16	16	16
3.125		12	16	20	8	0	28	8	24	8	8	16	24	4	16	4	4	8	32	4	4	20	8	8	4	16	12	12	16	24	16	4	12	0	12	16	4	0	16	32	12	24	8	8	16	12	12	12	16
3.15		12	8	16	8	4	28	4	24	16	12	16	20	4	12	4	8	16	24	4	8	16	8	16	4	12	16	12	0	20	20	4	12	4	12	20	8	4	28	28	8	20	8	8	12	12	20	12	16
3.175		12	8	4	8	12	16	4	12	16	12	16	20	4	8	0	12	24	20	8	16	20	0	16	4	8	16	16	8	12	24	12	12	8	4	12	12	4	20	28	4	16	12	8	8	12	20	16	16
3.2		12	16	12	8	8	24	8	12	8	12	16	32	16	12	4	12	20	20	4	16	16	12	12	4	8	12	24	12	20	20	16	12	4	8	8	12	4	16	40	4	12	16	8	12	8	20	20	12
3.225		12	16	12	8	4	20	8	8	16	8	8	20	12	16	4	4	16	20	8	20	20	16	8	0	4	16	20	4	24	16	12	20	4	8	8	20	4	32	36	4	16	8	0	8	8	16	20	20
3.25		16	16	12	16	12	20	16	12	24	4	12	16	0	8	0	0	16	20	8	28	20	16	8	4	8	12	16	4	20	12	8	16	8	8	4	16	0	20	28	8	24	8	4	8	12	20	16	16
3.275		8	24	28	16	8	28	12	16	20	12	16	24	0	4	4	4	16	24	4	16	16	12	16	8	8	20	12	4	16	16	12	12	8	12	8	12	12	8	28	8	20	12	8	16	12	24	12	16
3.3		12	12	28	20	8	28	0	12	8	8	16	20	4	8	4	8	8	20	12	16	28	8	20	4	4	16	8	8	20	16	12	16	8	4	8	12	16	12	28	4	16	8	12	16	16	24	12	12
3.325		20	12	28	16	12	32	0	20	0	0	12	24	12	16	8	12	12	12	8	24	20	12	16	4	4	8	16	8	24	16	4	16	4	8	4	16	8	24	24	4	28	4	12	12	8	28	24	8
3.35		12	28	20	8	8	24	4	16	8	4	4	16	8	12	8	8	16	24	4	16	20	8	12	4	8	20	12	8	20	16	0	20	8	12	8	16	16	24	28	8	24	0	16	12	8	28	16	24
3.375		4	20	12	12	8	16	12	8	20	8	8	12	4	8	4	0	12	20	8	20	28	4	8	8	4	20	12	8	20	16	8	16	8	8	12	16	28	20	36	8	20	4	20	16	12	32	4	24
3.4		12	16	8	8	8	24	16	8	16	4	12	20	8	12	4	12	16	12	12	16	24	8	12	8	4	8	16	4	28	16	12	16	0	12	4	24	20	20	28	4	16	8	24	12	12	28	8	12
3.425		16	20	16	4	8	20	12	8	8	4	20	12	12	12	8	12	16	12	12	16	28	16	16	0	4	8	20	4	24	16	4	24	8	8	4	20	8	16	20	4	16	8	20	12	16	16	8	20
3.45		8	12	20	8	8	12	16	16	16	12	16	16	8	8	8	4	8	8	4	16	20	12	12	0	4	8	28	0	8	20	12	16	12	0	4	20	4	16	32	4	16	8	4	12	12	4	8	16
3.475		8	12	12	8	8	16	12	12	16	8	12	16	4	4	0	4	12	20	8	16	24	8	8	4	4	8	32	16	12	16	16	12	12	12	4	20	8	8	40	8	12	8	12	12	8	12	8	16
3.5		12	12	8	8	8	24	4	8	4	4	12	16	8	16	0	4	8	28	12	20	24	8	12	4	4	24	20	16	28	12	8	28	8	16	4	20	12	8	28	12	20	4	12	20	12	16	8	28
3.525		4	16	4	12	12	24	8	20	4	4	8	20	16	20	0	8	4	24	12	12	24	4	8	4	8	20	24	12	24	20	8	24	0	4	4	20	12	20	24	8	20	12	12	8	8	16	8	20
3.55		8	28	16	12	12	20	4	20	8	4	16	20	16	8	4	8	4	20	12	8	28	4	8	12	8	8	20	20	20	16	4	12	0	0	8	20	16	12	28	8	16	12	12	4	8	16	4	20
3.575		16	16	16	8	12	32	8	16	12	8	20	24	8	8	4	12	12	16	8	24	20	0	12	16	8	8	4	16	24	4	0	20	4	0	12	16	16	16	24	12	8	4	8	8	12	16	8	20
3.6		20	0	12	12	12	32	16	12	20	8	16	20	4	12	4	8	12	24	4	16	24	4	12	12	12	12	16	16	16	12	0	24	16	0	8	12	4	20	32	8	8	8	12	8	12	20	12	24
3.625		20	8	24	8	12	32	16	8	24	20	12	16	12	20	16	4	4	20	0	8	16	12	16	8	12	20	20	12	20	20	0	24	16	4	8	12	8	12	40	8	4	4	12	12	12	20	16	24
3.65		20	8	24	4	24	32	8	12	24	16	4	20	16	20	16	8	8	24	8	8	20	16	12	8	4	12	8	8	24	20	8	24	12	8	12	16	12	16	28	20	4	4	16	12	8	12	16	20
3.675		16	12	24	4	16	20	0	16	20	16	4	20	4	16	8	8	16	28	8	8	32	8	12	12	0	8	12	8	16	24	8	24	12	4	12	28	4	16	24	16	8	4	12	8	12	16	12	16
3.7		12	16	24	12	12	24	4	12	8	20	12	20	8	16	12	4	20	20	4	20	24	0	16	12	8	12	28	4	12	20	0	20	8	8	20	24	8	16	32	8	12	0	4	8	16	16	16	20
3.725		16	20	8	12	16	28	8	12	12	8	8	24	12	12	12	16	20	24	12	12	20	0	24	12	12	8	24	0	24	20	4	20	8	12	12	24	8	24	36	8	16	8	16	12	16	12	16	20
3.75		24	20	0	4	16	20	4	20	8	8	4	28	4	4	12	20	20	20	8	4	20	4	20	8	4	4	16	4	32	20	8	16	8	4	20	28	8	24	28	4	20	16	16	8	8	20	16	20
3.775		20	8	4	12	16	16	8	24	8	12	12	16	4	4	16	4	20	12	0	16	12	4	8	8	12	8	16	4	20	16	4	12	12	4	28	20	8	16	24	4	24	8	0	12	4	24	12	20
3.8		16	8	8	8	12	16	8	20	24	8	12	12	8	4	8	4	16	20	4	20	24	8	12	16	12	20	20	4	24	8	4	12	16	12	12	20	0	16	32	4	24	4	4	20	16	24	16	20
3.825		16	12	16	8	8	20	4	12	24	4	8	20	4	0	8	8	12	32	4	20	28	12	8	16	8	12	28	4	24	12	16	24	16	8	12	20	8	12	32	0	12	4	4	8	16	16	12	24
3.85		12	12	12	8	4	36	4	12	20	4	12	16	4	12	12	8	8	28	4	16	16	4	12	12	16	12	28	8	12	12	16	24	8	8	12	20	8	20	32	8	8	4	8	8	8	8	4	20
3.875		12	16	16	12	4	28	4	16	24	8	20	24	4	24	4	8	0	20	4	20	16	8	20	4	16	16	28	8	20	16	8	12	4	16	4	24	0	28	28	8	16	8	12	12	8	12	12	20
3.9		12	24	24	12	12	24	8	16	12	8	16	28	0	16	0	12	8	24	0	20	12	8	20	4	12	8	24	0	28	20	8	16	4	8	12	24	12	20	28	4	12	4	12	16	4	24	8	24
3.925		16	20	20	8	20	28	8	16	0	8	16	20	8	8	4	8	16	32	0	16	24	4	16	4	12	8	20	4	20	8	12	12	12	0	24	16	12	12	36	12	12	8	12	12	4	28	0	24
3.95		16	20	20	12	16	20	12	12	8	12	12	12	8	12	4	4	16	28	4	20	28	12	12	8	16	16	16	4	24	12	8	16	12	8	12	24	0	12	32	16	8	12	8	4	8	20	4	24
3.975		8	20	20	4	12	32	12	20	20	8	16	12	0	16	8	8	16	28	4	16	24	8	16	12	12	16	16	8	24	8	8	24	4	8	4	28	0	16	28	8	4	4	8	4	8	20	8	36
4		4	20	24	4	8	44	4	20	16	12	24	16	0	16	8	8	20	24	8	12	20	12	16	16	4	8	20	12	20	12	12	16	8	8	4	24	4	20	36	0	12	4	4	12	8	24	4	32
4.025		12	24	24	4	8	28	0	8	16	16	12	16	0	12	8	4	16	28	12	16	12	16	16	12	8	4	28	12	28	20	4	20	16	12	8	20	12	20	32	12	16	12	0	20	8	24	4	24
4.05		12	16	24	4	4	20	8	16	20	16	8	16	0	12	8	4	8	40	4	20	16	8	12	8	8	4	32	8	24	16	12	16	16	8	12	8	12	12	36	16	16	8	8	8	8	16	16	24
4.075		4	12	16	8	4	28	12	12	28	12	8	16	0	12	8	16	8	32	8	12	12	8	8	12	4	8	24	12	20	24	16	16	16	4	12	12	4	16	44	8	20	0	8	4	16	20	16	24
4.1		0	20	4	8	8	24	4	8	24	12	8	16	4	12	8	16	12	28	16	16	8	12	8	12	12	8	20	12	16	24	16	24	20	4	12	16	4	20	36	8	12	4	4	8	12	28	8	28
4.125		0	24	8	8	12	16	0	12	16	8	8	12	8	16	0	16	12	32	8	16	16	8	12	8	12	12	8	12	16	16	16	16	12	8	8	24	16	28	24	8	4	12	12	8	8	16	16	28
4.15		4	20	8	4	12	24	8	16	24	4	12	12	4	16	0	8	4	32	0	12	20	4	12	0	8	16	12	24	20	16	8	16	4	4	16	24	16	28	28	8	12	8	12	12	4	16	20	20
4.175		4	16	12	4	12	28	12	20	16	8	8	12	4	12	4	4	8	28	4	16	12	8	8	4	8	16	24	12	20	24	16	20	12	0	16	12	12	16	32	8	16	8	8	12	8	20	12	16
4.2		4	12	12	8	8	24	8	8	12	4	4	16	12	4	4	4	12	12	4	24	4	4	8	12	0	16	20	4	24	16	16	20	12	4	4	4	12	16	24	12	16	8	8	4	8	20	16	16
4.225		16	8	4	4	8	28	12	4	20	0	8	16	16	8	8	8	12	16	12	24	12	4	8	12	0	16	12	12	20	16	4	16	16	12	8	4	12	20	28	8	16	4	8	4	12	20	16	20
4.25		16	16	20	8	20	28	24	16	16	0	16	12	16	12	12	12	16	24	16	20	28	12	4	16	4	12	12	12	20	16	12	12	20	20	20	12	12	20	36	0	16	16	16	16	12	16	12	20
4.275		12	24	20	16	12	24	16	24	12	12	16	20	12	16	4	16	16	20	8	24	32	8	12	16	16	8	16	12	24	12	20	16	4	16	20	20	4	20	36	8	12	20	12	20	4	16	12	20
4.3		8	20	8	12	12	24	4	16	20	16	12	24	12	12	4	12	16	12	8	16	24	4	24	12	12	8	8	8	20	20	20	28	8	12	12	20	4	16	36	12	12	8	8	16	0	16	8	20
4.325		0	16	20	8	12	24	4	16	12	12	12	20	8	8	4	0	12	12	8	8	24	8	16	16	4	8	8	4	16	12	12	28	12	16	4	20	4	12	24	4	20	4	8	12	4	16	8	24
4.35		0	20	24	8	4	24	0	24	4	12	4	12	0	12	0	0	12	12	8	8	24	12	8	12	8	16	8	8	24	20	8	24	12	16	4	16	4	20	28	4	16	4	0	4	4	8	12	16
4.375		12	24	20	4	8	16	0	16	12	12	12	8	4	12	4	0	20	20	8	12	20	8	16	4	8	24	12	16	20	20	12	20	12	12	16	8	8	12	36	8	8	4	8	4	4	8	12	16
4.4		12	24	20	8	4	20	4	8	20	8	20	20	4	16	4	0	20	16	4	16	28	4	20	0	8	20	28	16	16	20	4	12	16	12	20	16	8	12	36	12	16	8	8	8	8	12	12	28
4.425		12	24	12	16	8	28	4	16	28	8	20	24	0	8	8	4	16	20	0	12	28	12	16	12	4	12	28	4	28	20	0	12	12	20	8	16	8	24	32	12	12	8	4	4	12	16	8	20
4.45		16	12	16	12	12	28	4	24	32	12	16	8	4	4	8	12	16	32	4	12	20	8	12	12	0	12	16	8	16	24	4	20	12	12	4	12	8	24	24	8	12	4	4	4	12	20	8	16
4.475		12	4	16	12	8	24	4	16	24	8	12	20	8	8	12	12	12	32	4	8	20	8	12	4	4	12	16	16	20	24	4	24	20	4	12	12	4	24	32	12	24	0	4	12	8	20	12	16
4.5		8	8	4	12	8	20	4	12	20	8	20	28	8	8	16	12	20	28	0	8	20	12	16	8	4	4	24	12	24	12	4	20	8	12	8	16	8	24	40	16	20	8	4	12	8	16	4	20
4.525		12	16	8	8	4	16	4	16	16	12	12	12	8	12	8	8	24	20	0	20	20	12	20	8	8	8	20	4	20	16	4	20	4	8	8	24	12	28	28	12	16	8	12	8	8	20	8	24
4.55		20	28	16	8	0	20	0	12	8	20	12	20	12	16	16	12	8	8	4	12	24	8	24	20	8	16	12	0	28	16	4	28	12	4	16	16	12	20	20	4	24	0	16	4	4	24	8	24
4.575		8	16	20	12	8	32	0	20	12	12	20	28	16	12	16	12	12	8	4	16	20	0	20	24	12	20	12	8	28	24	8	20	16	8	24	12	8	12	32	4	24	0	4	4	4	8	4	20
4.6		4	12	16	8	16	28	0	20	16	8	16	16	16	12	8	0	20	8	4	20	12	0	8	12	20	16	20	12	24	24	4	16	12	4	16	16	4	24	40	8	16	4	16	4	4	8	8	12
4.625		12	20	12	12	12	32	4	12	8	16	20	12	12	16	4	0	12	4	4	12	12	4	8	4	20	12	24	8	20	24	0	20	4	8	4	12	4	24	28	8	16	4	16	4	0	24	20	16
4.65		8	20	12	12	8	32	4	12	4	12	16	16	12	12	4	8	4	4	4	8	16	12	16	8	12	16	28	4	16	20	8	20	0	8	8	16	4	24	20	4	8	0	8	4	4	20	20	20
4.675		12	12	12	4	12	28	0	8	8	4	20	12	8	12	8	12	16	4	12	4	16	8	12	16	8	8	28	8	20	16	8	20	8	8	8	16	16	20	32	12	8	8	12	0	12	16	8	20
4.7		12	12	16	4	12	24	0	16	16	8	24	20	4	8	8	8	16	4	12	8	20	4	12	16	8	8	20	8	28	24	8	16	12	8	4	12	16	24	40	20	16	8	12	8	12	16	4	20
4.725		4	20	16	4	8	20	8	20	16	12	20	28	8	8	8	4	12	8	8	12	20	8	16	8	8	16	20	8	20	16	8	20	8	8	8	20	8	24	36	8	8	8	16	8	4	16	0	16
4.75		4	16	8	8	12	28	12	12	4	16	20	20	4	16	4	4	12	20	4	16	12	4	16	0	8	12	20	12	24	12	12	20	12	12	12	20	4	24	24	4	8	12	12	0	8	12	8	20
4.775		8	20	8	12	16	28	12	12	12	16	12	16	8	12	4	4	12	20	0	12	12	4	16	8	8	12	16	8	32	16	12	16	16	8	12	20	4	24	24	8	16	8	8	12	12	12	8	20
4.8		8	16	8	12	12	16	12	16	12	12	20	12	12	12	8	0	16	28	4	4	20	4	16	12	16	20	16	8	24	16	8	20	12	12	8	12	8	28	32	8	20	4	8	20	8	12	4	24
4.825		16	16	4	4	8	20	12	12	12	12	20	12	12	16	8	0	12	28	4	8	16	4	12	8	16	20	12	4	28	12	12	20	8	12	4	4	12	28	36	8	20	8	8	12	8	12	8	20
4.85		16	24	12	0	12	32	12	16	20	8	8	16	8	8	12	4	20	16	12	12	12	8	8	4	8	12	12	4	28	16	8	12	8	12	16	12	12	20	36	4	16	12	8	8	4	12	4	20
4.875		4	24	16	8	12	24	16	12	12	4	12	12	0	20	12	8	16	20	12	12	16	4	8	4	8	16	8	16	28	16	4	12	16	16	16	8	12	20	32	0	8	8	8	4	4	12	4	20
4.9		8	24	12	8	8	24	16	12	16	8	12	12	12	20	8	16	8	16	4	16	12	0	20	12	16	20	12	16	28	12	4	20	16	16	20	16	16	20	28	8	8	4	16	8	4	16	8	16
4.925		8	24	12	0	12	32	4	28	24	16	20	16	16	12	4	20	20	12	8	16	12	12	28	12	16	8	20	12	12	16	8	24	4	12	20	24	8	20	28	12	12	4	12	16	0	20	4	24
4.95		12	16	12	12	8	28	4	24	24	8	16	24	4	16	0	12	20	20	12	8	8	12	24	12	8	4	20	8	24	20	8	28	4	16	20	16	8	16	36	8	8	12	4	12	4	20	4	24
4.975		8	20	12	12	0	20	8	12	12	12	8	16	0	16	8	8	12	20	8	8	12	4	20	8	12	12	28	4	32	28	12	20	4	12	20	12	12	8	36	12	8	8	12	8	4	20	4	20
5		8	16	16	4	16	16	4	8	4	12	12	16	4	20	16	8	16	20	12	12	28	8	16	0	12	16	20	8	24	28	8	24	4	0	16	16	8	8	32	12	12	8	8	8	8	16	8	16
5.025		12	20	8	4	16	12	4	4	12	4	8	28	16	16	12	12	16	24	20	12	24	4	20	0	8	12	16	8	24	24	8	36	8	12	16	20	8	24	36	8	12	12	8	8	12	16	20	16
5.05		12	24	8	8	4	20	12	8	16	16	20	24	12	16	8	12	20	20	8	16	12	4	20	0	8	16	20	4	24	28	12	24	8	20	16	20	4	28	32	12	12	12	12	8	8	16	20	24
5.075		12	16	12	16	8	28	16	8	12	20	20	20	4	8	8	8	16	32	4	8	16	8	16	8	8	16	20	0	24	24	4	12	12	8	8	28	4	24	20	8	20	8	8	12	8	20	12	24
5.1		8	24	8	8	12	24	16	12	16	8	20	16	12	12	8	8	12	40	8	8	28	8	12	8	4	12	24	12	28	20	8	8	8	4	8	28	8	24	24	8	16	4	4	8	8	24	12	20
5.125		4	28	4	4	16	28	16	28	24	4	16	20	8	20	8	12	12	32	4	12	16	4	12	4	0	12	24	16	24	32	8	12	12	12	12	16	12	24	28	8	12	12	4	8	8	24	12	20
5.15		8	16	0	4	20	36	12	24	20	4	4	32	0	8	4	16	8	24	4	16	12	4	8	4	8	8	20	8	8	24	8	12	12	12	12	12	8	28	24	4	8	12	4	20	8	28	16	12
5.175		12	20	4	12	16	28	8	12	24	4	12	24	4	12	4	8	8	24	8	16	28	12	8	4	16	12	24	8	12	12	16	8	8	12	12	16	8	28	24	8	8	12	4	16	8	16	28	20
5.2		8	20	20	12	12	24	16	16	24	8	12	20	8	12	4	4	16	32	4	12	28	16	8	12	12	12	28	16	28	16	12	16	8	20	8	16	8	24	36	12	12	12	12	8	8	4	16	24
5.225		8	16	20	8	12	28	12	20	16	16	16	16	12	4	4	16	12	28	0	12	24	12	0	8	8	12	28	16	24	20	8	24	4	20	12	8	12	20	40	8	4	4	16	20	4	16	4	20
5.25		12	20	24	12	8	28	0	16	16	16	20	24	12	8	4	16	4	16	4	16	20	8	4	0	4	16	32	4	16	20	8	20	4	12	12	8	20	24	32	8	8	8	12	20	4	20	8	20
5.275		12	16	28	12	4	16	4	12	8	12	16	24	8	8	8	12	12	16	12	12	20	12	12	12	4	16	28	0	12	16	8	12	16	8	12	20	8	28	32	12	16	12	4	8	16	16	8	16
5.3		8	16	16	8	8	12	12	16	16	8	16	20	8	12	8	12	12	16	12	16	16	12	16	16	12	20	24	4	20	24	4	20	16	8	20	24	4	16	36	16	12	4	8	4	12	20	4	20
5.325		12	8	24	4	12	20	8	8	20	4	16	24	8	12	4	4	4	12	4	16	8	4	24	12	20	20	24	16	24	16	4	24	4	8	12	16	12	16	40	16	12	4	8	8	12	16	0	16
5.35		12	12	24	8	8	32	4	12	12	12	12	20	8	12	4	12	4	12	4	8	16	4	20	12	12	12	24	20	16	12	4	20	8	8	16	8	8	28	36	8	16	8	8	8	16	12	4	8
5.375		4	20	12	12	4	20	8	16	20	8	8	20	0	12	12	12	12	20	8	8	12	8	8	8	0	4	24	16	20	20	12	20	16	8	24	4	8	20	28	8	16	4	12	0	8	20	8	8
5.4		8	24	12	20	8	16	12	12	16	4	12	24	8	12	8	8	16	24	8	8	12	8	16	8	4	4	20	8	16	16	20	12	12	8	12	4	12	12	28	4	12	4	4	4	4	20	16	8
5.425		8	24	12	8	8	36	16	16	12	12	8	20	8	12	4	8	8	20	12	8	24	8	12	12	16	16	20	8	16	16	16	8	4	8	16	20	8	20	32	12	12	8	0	8	8	12	16	12
5.45		8	20	8	8	4	28	20	16	24	20	8	12	0	8	12	4	8	12	12	4	20	8	16	8	20	16	20	8	16	16	16	12	4	4	16	20	8	20	36	12	16	8	4	12	12	16	12	16
5.475		12	12	12	8	4	24	8	8	24	20	8	16	0	4	12	4	12	20	8	12	24	4	24	4	12	8	12	4	12	16	8	16	8	4	8	8	4	20	32	8	8	12	8	16	8	16	12	20
5.5		8	16	12	4	12	32	12	4	20	12	12	20	8	4	12	4	12	20	8	12	28	4	20	8	12	8	12	12	8	20	8	16	12	8	12	16	8	24	20	4	16	12	12	16	12	8	8	12
5.525		12	20	4	12	16	32	12	8	20	12	24	12	8	8	8	8	24	20	12	8	20	8	20	4	12	8	20	8	12	20	16	24	8	8	16	16	8	24	24	8	20	4	8	12	8	8	16	12
5.55		12	12	8	8	16	28	4	8	16	16	20	20	4	4	4	12	24	28	8	8	20	8	16	8	4	12	20	8	20	12	12	24	16	8	12	16	8	20	36	12	12	8	4	4	4	8	24	24
5.575		8	16	12	8	16	28	8	8	20	12	16	20	4	8	8	8	16	32	0	12	16	8	24	20	0	16	8	12	20	16	12	16	16	12	4	28	16	16	36	12	16	8	4	4	12	20	12	16
5.6		12	24	16	12	8	24	4	8	28	8	8	12	4	8	4	4	20	36	4	20	8	12	16	16	8	12	4	8	24	16	8	16	8	8	4	32	20	16	32	8	16	4	8	12	8	16	12	12
5.625		24	24	20	8	12	28	4	16	24	12	12	24	4	8	0	12	16	32	8	20	16	12	16	16	8	4	16	4	20	8	12	16	12	8	20	24	16	12	28	0	12	4	16	12	8	8	16	12
5.65		16	16	16	8	16	20	8	12	20	16	12	28	8	12	4	12	8	16	12	12	28	4	20	20	0	8	20	4	24	16	16	4	12	12	20	24	8	20	24	4	8	0	12	8	16	20	12	20
5.675		8	20	20	8	8	20	12	12	20	8	16	20	16	8	8	8	16	24	16	8	32	4	8	8	4	16	16	8	24	24	4	8	16	12	8	24	8	24	28	16	8	0	4	8	8	24	16	20
5.7		12	12	12	8	4	36	12	20	12	4	20	20	12	12	8	4	20	36	12	16	24	4	16	4	4	24	20	4	16	12	8	28	12	16	16	12	4	16	36	12	12	4	0	4	20	20	16	16
5.725		8	12	8	8	8	28	8	16	16	8	16	20	12	16	8	4	16	32	12	16	16	8	24	8	4	24	16	0	16	8	8	36	4	12	16	4	4	16	24	12	20	8	12	4	24	20	12	24
5.75		12	20	12	4	8	24	12	20	12	8	28	16	12	12	12	4	12	28	8	16	24	8	28	8	4	12	12	4	16	8	0	16	8	12	12	12	12	20	16	12	24	4	20	8	8	24	4	12
5.775		8	12	20	8	16	28	12	12	16	8	24	16	12	12	8	0	4	20	4	20	20	8	28	8	4	12	16	4	16	8	4	12	12	16	8	20	16	20	24	8	20	4	12	8	8	24	4	8
5.8		8	16	20	12	12	24	8	12	20	4	16	12	12	8	4	8	12	16	8	12	20	12	20	12	8	20	16	4	16	16	12	16	16	12	4	20	12	20	24	8	12	12	8	8	8	20	8	20
5.825		8	16	12	8	4	32	12	20	12	4	12	12	8	8	16	16	24	24	8	4	20	8	16	8	8	16	16	4	24	20	12	16	20	8	8	16	16	24	28	4	12	8	12	8	12	12	4	20
5.85		8	12	16	16	8	32	12	16	20	12	12	12	16	8	16	12	12	16	8	12	20	8	8	0	4	12	24	0	28	28	8	12	16	8	8	8	12	16	36	8	20	0	12	12	12	16	12	20
5.875		8	20	24	20	12	24	4	20	24	12	20	16	20	12	8	4	0	12	8	24	20	4	4	4	8	8	20	8	32	24	4	4	8	8	20	16	4	12	32	8	16	12	4	8	8	20	12	12
5.9		8	20	16	12	16	24	8	20	16	8	16	28	12	16	4	0	12	24	4	16	20	4	16	4	20	0	16	12	24	20	4	16	8	8	16	24	12	16	16	0	8	20	8	4	4	16	4	12
5.925		12	12	16	8	8	32	8	20	8	4	20	24	12	16	4	8	20	28	12	8	28	16	12	0	16	12	16	8	20	20	4	16	4	16	0	20	12	16	20	4	12	8	12	12	4	16	8	16
5.95		8	16	20	8	4	20	8	20	8	8	16	20	16	12	12	8	20	36	20	12	24	12	8	4	12	20	16	4	24	20	0	16	4	16	12	20	8	12	36	8	20	4	8	12	16	20	4	16
5.975		8	16	16	12	4	24	12	8	8	12	16	24	12	12	8	4	12	32	12	12	20	8	16	8	12	16	12	12	24	24	8	28	12	12	20	28	4	20	28	8	16	8	12	16	16	28	4	16
6		8	12	12	8	12	28	4	12	8	12	20	16	12	24	4	8	12	20	4	12	28	16	20	12	8	20	12	12	32	16	16	28	8	8	8	16	4	24	24	12	8	4	8	20	12	24	4	16
6.025		12	16	20	12	12	24	4	20	16	16	12	20	12	16	4	4	20	8	0	12	24	8	16	12	12	16	20	4	24	16	8	24	4	8	4	16	8	20	32	12	12	4	12	20	12	20	8	20
6.05	odor on	8	16	24	16	8	24	12	24	20	12	12	16	16	12	0	12	24	12	8	8	12	8	16	8	12	8	8	8	28	24	4	16	8	8	4	24	16	24	32	4	12	8	12	16	4	16	8	16
6.075	odor on	8	12	16	8	16	24	16	20	12	20	12	12	24	8	0	16	28	16	20	12	20	16	12	16	4	12	12	8	20	16	8	12	12	16	8	20	16	16	28	0	8	12	4	16	4	20	0	12
6.1	odor on	12	20	12	12	20	28	8	16	4	32	16	28	16	8	0	4	16	20	12	12	32	8	8	16	0	8	12	8	16	12	4	8	16	16	8	20	12	16	36	4	16	8	8	20	12	24	4	16
6.125	odor on	8	20	8	8	16	24	4	12	16	20	20	16	16	16	4	12	12	28	4	4	32	4	20	12	4	8	12	12	28	20	4	12	8	0	0	28	12	24	32	12	20	4	4	12	16	40	16	24
6.15	odor on	4	8	8	4	12	24	8	16	24	16	12	20	12	16	12	12	12	28	4	8	24	8	12	12	12	20	28	12	16	32	16	20	4	4	20	36	16	12	28	12	12	8	0	20	24	72	36	20
6.175	odor on	4	12	8	4	8	28	12	28	24	16	4	36	0	8	12	4	16	24	12	20	16	8	12	8	12	28	32	4	20	32	16	12	16	4	24	36	16	12	36	12	12	16	8	48	36	96	48	20
6.2	odor on	8	12	12	4	12	28	12	16	24	8	16	20	8	4	4	8	24	24	12	20	16	8	16	12	12	16	28	16	24	16	4	8	16	4	20	36	12	24	36	12	16	12	12	64	52	100	60	32
6.225	odor on	12	20	20	12	12	24	4	12	24	16	20	20	8	8	0	12	20	24	4	16	24	4	12	16	16	12	24	20	20	20	12	12	4	8	24	36	20	24	36	4	16	8	16	68	60	76	60	36
6.25	odor on	16	36	24	8	8	28	8	16	28	20	12	20	12	8	4	16	12	24	16	24	32	0	20	16	12	24	24	8	28	32	12	8	4	8	24	44	20	24	40	4	24	16	16	72	60	60	48	36
6.275	odor on	16	32	32	8	16	28	8	20	28	28	12	20	12	4	8	12	16	28	20	16	32	8	16	8	12	20	32	8	32	24	12	4	16	16	28	40	16	20	36	8	28	12	12	60	52	52	52	36
6.3	odor on	12	12	32	16	16	32	0	24	32	20	20	24	4	0	8	8	24	24	12	0	24	8	12	12	16	12	36	16	20	28	16	12	16	20	24	36	24	16	36	8	20	8	20	40	52	48	48	32
6.325	odor on	16	20	28	12	16	36	0	16	32	4	20	24	8	4	4	4	16	24	16	12	24	0	16	12	16	16	36	20	16	36	4	12	8	20	24	36	28	24	36	16	24	20	24	40	56	52	36	36
6.35	odor on	28	28	32	8	12	28	8	16	32	16	20	32	8	4	4	8	8	28	20	16	36	0	24	4	8	24	40	12	12	28	4	8	4	32	24	36	20	16	36	24	24	16	20	44	44	60	36	40
6.375	odor on	24	20	32	4	4	32	12	12	32	20	20	28	8	4	12	16	20	32	16	4	36	0	24	4	4	24	40	12	12	24	12	12	12	28	24	28	24	12	44	16	20	8	16	40	40	52	40	28
6.4	odor on	20	16	28	12	12	32	8	12	32	12	20	28	8	4	12	12	28	28	20	12	28	4	16	4	4	16	36	8	24	24	8	16	16	12	24	24	28	24	36	12	16	8	28	32	40	40	40	28
6.425	odor on	16	20	28	24	8	40	16	12	28	12	24	20	8	4	4	8	24	20	20	16	28	8	16	8	8	8	32	16	24	28	8	16	12	12	28	32	16	16	40	12	12	12	32	32	44	52	28	36
6.45	odor on	24	20	32	16	12	40	16	4	28	20	8	16	16	8	0	16	20	16	20	8	32	8	16	8	12	8	28	24	20	28	8	12	16	12	28	36	12	20	40	16	20	20	28	36	48	52	20	40
6.475	odor on	24	20	36	12	16	28	20	16	24	20	8	16	12	12	8	16	16	24	12	16	24	12	8	12	12	8	32	12	16	28	4	8	8	8	24	36	16	24	32	12	16	16	16	32	40	48	24	28
6.5	odor on	12	28	36	16	16	28	24	28	28	24	20	24	0	12	16	8	12	24	12	16	24	20	4	8	16	12	32	4	20	32	8	8	4	20	24	28	12	16	24	8	4	16	20	32	28	44	28	24
6.525	odor on	24	16	28	12	16	32	12	20	40	16	24	32	12	8	8	4	8	20	20	12	32	12	4	0	8	16	32	8	20	28	4	8	12	28	24	28	8	20	24	8	4	16	24	24	36	40	32	36
6.55		28	12	20	12	20	28	12	16	32	8	12	12	12	8	0	0	8	28	16	12	32	12	12	8	12	20	24	12	20	28	12	16	12	12	24	36	24	20	36	4	12	8	8	20	36	44	36	28
6.575		28	24	20	12	24	24	16	20	28	16	16	16	12	4	4	4	16	36	20	12	28	8	8	12	16	24	20	8	24	28	12	12	8	16	20	28	20	12	32	12	12	4	16	40	32	44	36	20
6.6		24	24	20	12	20	32	16	16	20	16	16	24	12	8	4	20	20	32	16	16	24	4	12	8	12	16	32	12	24	24	8	16	12	20	16	28	16	16	32	16	8	12	24	44	36	48	28	24
6.625		16	20	20	12	16	28	16	8	16	16	20	20	4	16	0	20	20	36	20	12	28	4	20	16	16	12	32	8	20	20	8	16	12	20	20	32	16	24	40	8	8	16	12	20	24	32	24	24
6.65		16	20	28	12	4	32	8	16	16	8	24	16	4	8	8	8	20	36	24	16	28	4	12	16	12	12	28	12	24	28	4	8	16	16	16	24	4	24	40	8	8	8	12	4	8	8	12	16
6.675		16	16	24	8	16	36	8	16	8	8	12	20	4	12	8	8	24	24	8	20	24	8	16	8	12	20	12	16	24	28	8	12	16	4	16	8	8	28	40	12	8	8	12	0	0	0	0	12
6.7		20	20	8	12	12	20	16	12	4	8	20	28	8	20	8	8	20	28	8	16	16	4	12	8	12	24	8	12	16	16	8	20	12	0	16	12	4	28	24	20	8	20	8	0	0	0	0	16
6.725		8	20	4	24	8	28	12	12	8	4	12	20	8	20	12	8	8	32	16	16	16	8	12	8	8	24	24	8	20	24	8	20	8	0	8	16	4	20	20	16	12	16	12	0	0	0	0	12
6.75		4	12	12	20	16	28	12	12	8	12	12	16	8	24	12	12	12	32	12	12	24	16	16	8	8	20	16	8	12	24	4	16	8	0	4	12	4	12	20	0	8	4	12	0	0	0	0	4
6.775		8	16	16	16	8	20	8	16	8	8	12	24	8	12	12	8	12	28	12	8	24	12	16	8	8	12	4	8	12	8	8	16	12	0	4	12	4	12	24	4	8	4	8	0	0	0	0	4
6.8		4	16	16	12	4	16	4	8	12	4	12	20	12	12	8	4	8	20	12	16	24	4	20	12	4	24	4	12	16	8	8	20	16	8	12	12	12	12	28	8	12	8	4	0	0	0	0	12
6.825		0	20	16	8	8	12	4	8	8	12	12	8	12	16	8	12	8	20	12	20	20	8	24	12	8	16	12	16	12	16	0	20	12	8	12	12	12	20	28	8	12	8	0	0	0	0	0	16
6.85		4	28	12	16	12	16	0	16	16	16	8	16	4	4	8	8	16	28	16	20	16	8	20	16	12	8	16	4	24	12	8	16	4	4	8	16	4	16	36	8	12	8	8	0	0	0	0	8
6.875		4	20	12	12	16	20	4	20	24	8	12	28	16	8	4	4	20	28	12	20	24	8	12	20	12	16	12	4	24	4	8	12	8	12	4	16	0	12	32	4	8	8	8	0	0	4	0	4
6.9		4	20	16	8	12	20	8	28	16	0	16	20	16	16	4	8	12	24	20	20	20	8	12	16	4	12	8	8	16	8	0	4	12	8	0	16	8	28	28	0	12	8	4	0	4	4	0	4
6.925		4	24	8	20	8	16	8	24	12	4	16	20	0	12	4	8	8	28	20	20	16	8	16	8	0	8	12	12	24	20	8	16	8	4	8	16	12	16	28	8	12	4	4	0	8	4	0	4
6.95		0	20	4	20	12	20	8	12	8	4	8	20	4	12	8	4	12	24	8	12	20	12	20	4	8	8	28	8	24	20	12	16	8	8	8	16	8	16	24	8	24	0	0	0	8	8	0	12
6.975		0	20	16	8	8	16	8	12	12	8	4	24	8	16	12	0	16	24	8	20	24	12	12	12	12	8	24	8	16	12	8	8	12	12	0	20	4	20	36	8	20	4	0	4	4	16	0	12
7		16	20	16	12	0	20	8	12	16	12	12	20	8	20	8	0	12	20	8	24	28	16	12	16	16	16	12	12	24	16	8	8	8	12	4	8	0	16	40	8	4	4	4	4	0	24	0	16
7.025		16	16	4	16	0	24	8	12	16	12	12	20	4	20	12	4	8	12	8	28	24	20	16	8	12	12	20	8	20	20	8	20	4	16	4	12	0	12	24	4	16	4	12	0	0	12	0	16
7.05		8	20	8	8	4	16	8	8	12	12	8	28	4	20	8	8	8	20	12	20	24	12	12	8	4	4	24	8	12	24	4	20	8	16	4	24	12	12	28	4	20	4	12	4	4	8	12	12
7.075		8	16	16	4	12	16	12	12	8	12	8	24	8	12	4	12	12	16	16	8	20	8	12	20	12	4	20	8	16	32	4	16	8	12	12	16	12	20	36	4	12	0	8	16	12	12	20	20
7.1		4	20	20	0	16	20	12	20	12	12	16	16	12	8	8	8	16	16	8	16	20	12	16	12	8	4	16	12	24	24	8	20	8	8	20	16	12	16	32	8	16	8	12	12	8	12	8	16
7.125		8	24	12	0	20	32	8	12	8	12	16	8	12	8	8	8	8	12	8	16	24	4	16	4	8	8	8	12	16	24	16	16	16	8	12	12	20	16	32	4	20	8	16	0	8	16	4	12
7.15		4	16	0	16	16	32	12	12	12	20	8	20	8	0	4	12	8	16	16	12	24	4	24	8	8	12	16	8	12	20	16	24	12	12	8	8	8	24	40	4	8	0	12	4	8	20	4	12
7.175		0	16	12	20	4	28	12	8	20	16	12	16	8	4	8	4	20	24	12	16	24	8	24	4	4	16	28	8	24	16	8	24	12	8	12	16	4	24	36	4	4	8	4	12	0	16	4	20
7.2		4	12	16	4	8	20	8	8	12	12	12	8	8	4	12	4	16	20	12	16	12	4	16	4	12	16	20	8	16	28	4	20	16	12	16	8	4	20	28	0	8	8	8	12	0	12	4	24
7.225		8	8	8	4	12	24	4	12	16	16	12	16	8	8	4	8	12	12	12	16	12	0	20	8	12	8	16	12	20	20	8	24	12	12	8	4	4	24	24	4	8	4	12	8	0	12	0	8
7.25		12	16	12	16	12	24	8	12	20	12	20	24	8	16	16	8	12	12	16	16	20	4	24	4	8	8	24	12	28	16	8	20	12	12	4	16	4	28	32	12	16	8	4	8	0	12	0	8
7.275		12	24	12	24	12	20	12	12	8	12	12	24	4	8	20	12	16	16	12	16	24	4	20	4	8	8	16	8	16	20	8	16	12	8	16	12	8	32	36	16	24	8	12	4	0	12	4	16
7.3		4	20	4	20	4	16	8	4	8	16	12	20	8	8	12	16	16	12	4	16	20	4	8	4	12	12	8	4	20	20	8	16	12	4	12	16	12	24	40	12	12	4	12	4	4	8	8	12
7.325		0	24	8	12	0	20	8	8	8	12	12	20	8	16	16	16	16	16	8	16	12	8	16	4	8	12	12	0	20	24	0	12	16	8	12	20	12	12	32	4	12	4	4	8	8	16	4	12
7.35		4	24	12	12	0	28	16	16	8	4	4	16	0	20	8	8	20	16	8	16	12	4	24	4	8	8	20	8	12	20	8	16	12	8	16	8	12	24	36	4	16	8	8	8	8	16	0	16
7.375		4	20	4	12	12	16	12	20	20	4	8	16	0	24	4	4	16	20	8	20	12	8	16	16	12	16	16	12	28	16	8	12	12	8	16	16	8	16	28	12	16	4	4	8	16	16	0	20
7.4		4	20	16	4	12	24	8	20	12	8	8	12	4	16	8	12	8	20	12	20	20	8	20	16	12	16	20	4	24	12	8	4	8	16	20	20	8	12	20	8	20	0	4	4	12	20	8	16
7.425		12	28	28	12	0	32	8	24	0	4	4	16	4	8	4	8	16	12	8	12	24	4	24	8	12	12	28	4	20	8	8	12	4	24	16	16	12	16	36	0	8	8	8	4	8	16	12	16
7.45		8	20	20	16	4	24	0	28	16	0	4	16	0	8	0	4	20	8	8	16	20	8	24	12	12	20	20	8	32	16	8	20	4	16	12	20	12	16	36	0	12	8	8	4	12	16	4	24
7.475		4	16	20	8	12	20	8	20	24	4	4	16	0	16	0	8	16	12	16	20	20	8	12	8	12	20	12	12	28	16	8	28	4	16	8	16	4	12	28	0	20	4	4	4	12	20	0	20
7.5		8	16	20	8	12	20	12	12	12	8	0	12	0	12	4	8	20	16	8	8	28	4	16	12	8	16	12	8	16	12	4	24	4	16	16	16	8	16	24	8	12	4	0	12	8	20	4	20
7.525		8	24	12	12	8	20	8	8	8	4	16	12	8	16	8	4	16	12	0	8	24	4	16	24	4	24	16	4	20	16	8	12	8	8	20	24	8	20	20	8	8	0	4	12	4	12	16	12
7.55		4	28	8	16	8	16	8	16	16	4	20	16	8	16	8	4	20	12	4	16	24	8	8	16	4	16	12	8	16	20	12	12	8	4	12	16	0	12	24	0	12	4	4	4	8	20	16	16
7.575		4	16	8	8	8	20	8	20	24	8	12	16	4	4	8	4	16	16	8	12	24	8	16	4	12	8	16	8	12	24	12	20	4	12	12	16	4	20	36	0	12	4	4	8	8	24	12	24
7.6		12	16	12	4	12	36	12	24	16	8	16	24	8	8	4	4	12	28	8	8	12	12	12	4	16	16	16	4	24	24	12	20	4	16	16	20	4	20	36	4	12	4	8	12	4	16	8	16
7.625		8	24	16	8	8	36	8	20	12	8	12	24	4	4	4	4	20	28	8	16	16	8	8	12	20	16	8	8	24	20	8	8	0	8	16	24	8	20	28	12	8	4	8	16	4	16	4	24
7.65		8	20	12	8	12	28	0	8	8	12	4	20	4	4	8	0	16	20	4	16	20	8	16	16	16	12	16	16	28	12	4	8	8	4	12	24	8	16	28	8	12	4	4	12	4	12	8	20
7.675		8	16	12	8	12	32	0	16	4	8	16	24	8	8	12	4	16	16	0	12	24	16	20	16	12	24	20	8	20	12	12	12	12	8	8	12	8	8	24	0	16	4	4	0	4	4	4	16
7.7		4	20	8	4	8	32	0	24	16	16	20	20	4	4	8	4	20	20	4	16	28	8	12	24	8	24	20	0	16	20	8	16	8	8	12	4	12	8	28	4	12	4	12	0	4	8	4	20
7.725		8	12	12	4	8	32	8	24	20	20	8	16	8	8	4	0	16	20	12	12	28	0	16	12	8	12	24	0	12	16	4	20	16	0	16	8	8	12	40	8	12	8	8	8	8	12	4	16
7.75		4	12	12	4	4	28	12	16	12	12	12	12	12	16	8	0	16	20	12	8	16	8	16	0	8	8	16	0	12	4	12	12	12	8	12	16	4	16	40	8	12	4	8	16	20	16	4	20
7.775		8	16	12	12	16	20	4	8	12	20	8	16	8	12	4	4	12	24	8	8	20	12	16	8	4	8	12	8	24	4	8	4	4	8	12	12	4	16	28	8	12	4	8	16	12	12	12	20
7.8		12	20	24	20	12	24	16	8	16	24	12	28	8	12	16	4	12	20	4	16	36	8	20	8	8	16	16	12	12	20	0	8	12	0	20	8	8	20	28	8	12	8	4	8	12	0	12	20
7.825		8	28	20	12	0	28	20	20	16	16	16	24	4	8	20	4	8	24	0	16	24	8	8	4	8	16	20	12	16	28	8	12	16	4	16	8	8	24	36	8	8	8	4	8	16	8	8	12
7.85		8	20	16	8	0	16	16	20	20	8	8	16	0	0	8	4	8	24	4	8	16	12	8	8	8	8	32	8	24	24	12	12	12	8	8	12	8	16	32	8	12	4	8	8	16	20	4	16
7.875		8	16	12	8	8	12	12	16	20	12	16	8	4	4	8	4	16	16	4	16	12	16	16	8	12	4	32	0	20	28	4	12	4	4	12	8	8	16	32	4	12	0	16	8	8	20	0	20
7.9		4	24	12	8	8	24	8	24	28	8	12	12	16	4	12	4	20	12	4	20	12	12	20	8	8	12	20	0	20	20	4	8	4	8	20	8	8	24	28	12	4	0	12	12	4	20	12	24
7.925		0	20	16	4	4	28	8	12	28	4	8	20	12	8	8	4	20	16	16	20	24	8	20	8	8	12	16	0	20	16	12	8	8	12	20	12	4	24	16	12	8	0	12	4	12	16	16	16
7.95		4	16	16	8	12	24	8	8	24	4	8	20	0	8	4	4	16	16	12	24	20	4	12	4	12	4	12	4	16	16	12	16	8	8	16	12	4	24	24	0	12	0	12	4	8	16	4	8
7.975		8	16	12	12	8	24	12	16	24	0	12	24	4	8	8	4	16	16	4	12	16	4	12	4	4	4	16	8	20	20	8	12	12	4	20	16	8	16	32	4	16	8	4	4	4	12	8	16
8		4	20	16	12	8	20	16	12	20	4	12	28	8	12	4	8	20	20	4	8	24	4	16	12	4	8	20	4	24	28	8	8	12	0	8	16	12	16	28	4	16	12	8	0	12	20	8	20
8.025		8	28	12	12	12	24	12	16	16	16	12	32	4	4	0	4	20	24	4	12	12	8	12	12	12	8	8	0	24	28	4	12	8	12	16	12	8	20	36	4	12	4	12	4	8	20	12	16
8.05		12	20	8	4	4	28	8	12	8	12	12	24	8	4	8	4	24	20	4	16	12	12	16	4	12	16	12	8	24	24	8	8	4	16	16	8	4	20	32	4	16	4	12	16	4	16	16	16
8.075		12	12	16	0	4	28	16	12	12	8	8	16	8	8	8	8	24	12	0	20	24	8	12	0	8	16	28	12	24	16	12	0	8	8	12	12	4	20	32	4	12	4	8	12	8	28	8	24
8.1		12	8	12	8	8	24	12	20	12	8	16	16	8	4	4	4	16	20	4	16	24	8	0	4	8	4	24	4	20	24	8	12	8	4	12	16	8	16	32	4	16	0	4	0	4	24	4	20
8.125		16	20	20	12	8	20	0	8	16	0	12	16	12	8	12	0	12	36	4	16	20	4	8	8	16	12	16	4	16	28	4	20	0	0	8	16	8	16	28	12	16	0	12	8	8	24	4	24
8.15		12	28	20	12	8	20	4	4	24	0	12	16	12	16	12	8	12	28	0	12	20	4	20	8	16	20	20	8	24	20	8	12	4	8	20	16	4	8	32	12	8	0	8	8	8	20	8	24
8.175		8	20	8	20	4	16	12	8	16	0	16	16	12	8	8	8	12	28	0	8	24	4	16	8	4	12	24	8	24	8	16	16	12	8	12	12	12	12	28	0	16	8	4	4	4	16	8	20
8.2		16	20	12	16	4	28	12	8	12	4	12	24	8	4	8	4	16	24	4	8	28	8	12	4	0	8	24	4	28	4	16	16	8	4	12	8	8	16	28	4	16	8	4	4	12	20	12	28
8.225		12	12	20	4	4	36	8	16	16	12	12	28	4	8	8	12	28	12	8	12	28	8	20	8	4	8	20	4	24	8	16	8	12	8	16	16	8	16	40	4	20	4	4	0	12	20	16	24
8.25		8	12	16	4	4	28	4	16	20	12	12	24	8	8	12	8	20	16	4	12	20	12	20	12	4	8	16	12	24	4	12	16	12	8	20	12	12	24	36	0	16	4	12	8	12	20	8	20
8.275		8	24	8	8	12	24	0	12	28	12	12	24	12	8	4	4	4	24	8	12	20	8	16	4	12	12	16	12	28	12	4	16	0	12	24	12	8	28	32	0	24	4	12	12	8	20	8	16
8.3		4	20	8	8	12	24	0	16	32	12	12	20	4	12	0	12	4	16	8	8	24	4	16	8	20	12	24	4	24	12	4	16	4	12	12	24	8	28	36	4	28	4	4	4	0	24	8	12
8.325		8	12	8	4	12	24	12	12	24	12	8	28	0	16	0	8	8	16	4	12	24	4	20	8	8	8	28	4	20	12	8	16	8	8	12	20	8	28	28	8	16	8	8	8	0	20	12	20
8.35		12	16	12	8	20	20	12	16	16	8	8	20	8	8	4	0	16	16	4	20	16	0	20	4	4	20	24	4	20	16	4	12	8	12	24	16	12	32	20	8	16	12	12	12	8	8	16	24
8.375		8	24	12	8	16	20	0	28	16	0	12	8	8	8	12	4	24	8	4	16	12	4	16	4	16	20	16	0	24	12	8	16	8	12	20	20	16	24	32	4	16	8	8	4	12	16	4	12
8.4		4	28	16	8	8	28	0	20	16	4	12	12	8	8	8	8	16	16	4	8	24	8	24	4	20	12	12	8	16	16	16	12	12	4	16	24	8	24	32	0	12	8	4	12	12	24	12	12
8.425		0	20	16	16	16	24	8	8	12	4	8	16	12	12	4	4	12	20	4	20	28	4	24	8	12	16	20	20	24	16	8	16	12	0	16	24	8	24	28	4	12	8	4	16	12	16	16	20
8.45		4	20	12	12	12	24	12	12	12	4	16	24	12	16	8	4	12	8	8	20	20	12	8	16	8	12	24	12	32	20	4	16	12	8	12	24	12	24	28	8	16	4	8	4	8	4	8	16
8.475		8	28	12	8	8	20	8	12	12	4	20	32	12	12	8	8	12	8	4	16	12	20	8	12	12	16	16	4	24	16	8	12	16	12	4	32	12	28	28	4	8	16	8	12	12	12	8	20
8.5		12	28	8	12	12	16	12	16	8	8	12	28	4	12	12	12	8	16	4	16	12	8	20	4	16	20	16	8	20	16	8	20	16	8	12	32	8	24	36	4	0	16	8	12	16	16	4	20
8.525		12	24	8	8	8	24	8	16	16	8	4	20	0	12	20	8	16	28	4	0	20	8	20	16	8	8	20	8	12	24	8	20	16	12	12	24	8	24	36	8	8	4	16	4	8	8	0	16
8.55		8	20	12	8	4	24	4	20	24	4	12	28	8	16	12	8	20	28	8	16	24	8	20	12	8	8	16	4	8	32	8	16	12	16	16	28	16	24	24	4	12	4	12	8	4	8	0	16
8.575		4	16	12	8	0	12	8	24	16	8	12	24	12	20	4	12	4	20	8	20	24	4	20	8	12	8	20	0	20	28	12	12	16	16	20	24	8	28	24	0	16	4	0	8	8	16	4	16
8.6		0	20	12	4	12	16	12	16	16	4	8	16	16	12	8	8	8	20	0	12	20	4	8	8	8	8	20	8	24	16	8	8	16	12	16	16	12	20	28	0	12	8	8	8	8	20	4	20
8.625		8	20	20	8	16	24	12	16	20	0	12	20	20	8	4	16	16	24	4	12	20	0	4	8	4	20	20	8	16	16	4	12	12	4	16	16	16	16	36	4	4	8	8	8	12	20	8	20
8.65		20	16	20	12	12	28	8	12	12	8	4	24	12	20	4	12	12	32	16	4	24	0	4	8	4	16	20	0	20	16	4	16	8	4	8	12	12	24	40	8	8	8	4	4	12	16	16	12
8.675		16	12	12	12	16	28	12	20	12	8	8	16	12	16	8	4	16	32	12	16	16	0	8	4	8	16	12	8	16	20	4	16	12	12	12	8	16	20	40	8	8	4	4	4	8	12	12	16
8.7		8	12	8	4	12	24	16	24	16	4	16	16	8	16	8	16	20	24	8	20	8	4	16	4	12	16	8	8	4	16	8	24	12	12	24	20	8	20	32	4	16	0	12	4	12	20	4	16
8.725		16	12	20	0	8	20	16	8	20	4	16	16	4	16	8	12	8	24	8	16	12	4	16	12	8	12	12	4	8	24	4	20	0	12	24	32	8	16	32	4	20	4	16	0	16	16	8	16
8.75		16	12	16	8	12	16	8	16	20	8	12	8	8	12	12	4	8	24	0	16	20	0	8	16	8	20	16	12	12	36	0	8	0	16	16	24	12	12	32	4	16	8	4	12	8	4	16	24
8.775		12	16	8	8	8	16	8	20	12	12	8	16	8	16	12	12	12	24	4	4	20	4	4	8	16	16	16	12	20	28	0	8	8	8	16	16	12	16	24	4	8	4	4	12	4	8	16	20
8.8		12	16	16	0	4	16	12	16	12	12	12	20	4	12	4	12	8	32	8	12	20	12	12	12	8	16	20	8	32	24	12	12	12	0	8	8	8	8	32	8	12	0	4	12	8	20	12	16
8.825		8	24	16	8	4	16	4	20	12	16	16	12	0	4	12	8	8	16	12	16	24	16	12	12	8	16	20	4	20	24	12	16	4	4	8	16	4	12	32	12	16	8	4	20	4	16	8	16
8.85		12	28	8	8	8	24	4	12	4	8	8	24	0	8	16	4	12	8	16	4	20	12	12	8	12	20	12	12	20	24	4	16	0	4	8	24	4	20	24	12	8	8	4	8	0	8	12	24
8.875		8	16	4	12	8	24	8	16	8	12	12	28	4	8	4	12	12	20	8	12	16	4	12	4	16	16	16	16	24	16	12	12	4	0	8	20	8	16	24	12	12	0	4	4	20	16	8	16
8.9		8	12	8	24	8	16	8	20	8	20	12	16	8	4	4	16	16	24	8	16	20	8	8	8	12	0	24	12	16	20	12	12	4	8	12	16	8	20	32	20	16	0	8	12	20	16	8	8
8.925		12	20	8	16	8	28	8	16	8	12	4	16	12	4	12	12	24	16	12	20	28	12	16	12	4	0	28	8	24	24	4	8	4	16	20	8	8	16	32	24	8	4	8	12	4	16	12	16
8.95		8	20	8	4	0	36	8	24	8	12	12	16	12	4	12	8	20	20	8	20	28	4	20	12	4	12	32	8	28	8	4	8	12	12	20	20	8	20	28	16	8	4	12	8	8	24	12	8
8.975		4	12	24	4	8	36	8	28	0	8	20	16	16	8	8	8	16	28	8	8	24	8	12	12	0	16	20	16	20	20	4	24	8	4	8	24	8	24	24	16	12	4	16	12	4	16	12	20
9		4	12	28	4	8	28	4	24	4	4	16	16	12	12	8	12	12	24	12	12	32	12	16	12	0	20	12	12	20	24	12	32	0	12	8	20	8	16	24	16	16	16	8	8	12	20	4	28
9.025		12	16	8	8	0	20	0	16	12	8	16	16	8	12	4	8	4	24	16	16	32	12	16	12	4	24	24	4	20	12	12	20	4	16	8	20	8	12	28	12	20	16	4	8	16	24	4	16
9.05		12	20	0	8	4	28	0	16	12	8	12	12	8	4	4	12	12	24	12	12	12	8	4	16	4	8	20	8	20	20	0	16	4	12	8	24	16	8	28	8	16	8	12	12	4	16	16	16
9.075		12	28	0	8	8	36	8	16	16	8	8	20	8	4	4	16	24	24	12	12	20	4	16	12	8	16	8	8	24	16	4	20	8	12	12	28	12	16	32	0	20	4	8	8	8	20	16	12
9.1		12	24	8	16	16	32	12	16	16	12	20	28	12	8	0	12	16	20	12	8	20	8	28	4	12	20	12	8	24	16	4	20	16	8	8	24	4	24	28	0	12	4	0	8	20	28	4	16
9.125		4	16	12	12	16	28	8	20	4	16	16	12	4	12	0	12	12	24	8	12	20	8	28	12	4	8	12	12	24	32	0	12	8	12	8	20	0	24	32	8	4	4	12	4	16	24	0	20
9.15		12	12	8	4	12	28	12	8	8	12	12	8	8	20	4	16	20	24	4	16	28	8	24	8	4	8	20	4	24	32	12	12	0	12	4	8	0	12	32	12	16	8	16	0	12	20	8	20
9.175		8	20	12	8	8	20	8	12	16	12	12	16	8	12	4	16	16	16	0	8	20	4	12	4	8	12	24	4	24	20	12	16	0	8	8	8	8	16	24	8	20	12	8	12	8	20	12	20
9.2		4	24	12	12	4	16	8	16	20	12	16	20	4	4	4	16	16	28	8	8	16	0	16	4	8	16	12	4	20	12	0	16	4	8	16	16	12	28	28	8	16	8	8	12	0	12	8	16
9.225		8	16	16	4	8	20	8	16	16	8	16	24	8	12	8	8	16	36	16	4	20	8	12	4	4	12	8	8	16	12	0	16	16	8	8	12	4	20	32	16	20	8	8	8	4	8	4	20
9.25		4	24	12	0	8	32	8	20	12	16	8	16	12	12	12	4	8	20	8	8	24	8	12	8	4	12	8	12	16	12	0	12	16	8	12	12	0	20	32	12	20	4	12	8	4	16	0	28
9.275		8	24	16	12	12	28	8	24	24	12	8	20	16	8	16	4	12	16	4	20	20	0	20	12	8	16	12	4	16	16	0	16	8	4	16	12	4	20	24	0	12	0	4	8	4	24	8	24
9.3		8	20	28	20	12	20	8	20	24	4	8	24	12	4	12	4	16	24	8	16	12	8	16	12	4	20	20	12	20	20	4	12	12	12	12	4	8	20	28	0	8	12	0	8	12	24	12	12
9.325		12	24	20	12	8	28	16	12	16	8	8	16	4	12	4	8	16	16	8	4	16	8	16	8	4	16	20	16	20	20	8	4	12	16	12	12	12	24	36	8	8	16	4	0	12	16	4	8
9.35		12	20	12	8	8	32	20	16	16	4	12	20	0	12	8	4	20	8	16	8	32	4	12	8	12	8	16	4	24	28	8	4	4	4	8	20	12	24	28	8	12	8	8	0	8	16	4	16
9.375		0	16	4	8	8	28	12	8	16	4	16	24	4	8	12	4	20	16	12	12	32	8	12	16	12	8	24	12	24	20	4	12	4	0	8	12	12	16	28	4	20	8	8	4	16	20	4	12
9.4		4	12	8	12	12	32	4	12	16	4	20	24	8	16	8	12	20	16	0	16	24	4	12	16	8	8	28	16	16	16	0	16	16	12	8	8	8	20	36	4	16	8	12	4	20	16	8	8
9.425		12	12	12	8	12	32	12	20	20	0	20	12	4	8	8	8	16	24	0	20	20	4	12	8	8	8	20	12	24	24	8	12	12	20	4	16	4	28	36	8	16	12	8	0	8	12	8	12
9.45		20	12	8	8	4	28	12	12	20	0	20	16	0	4	8	8	8	32	4	16	20	4	12	8	4	12	16	12	32	12	20	12	12	12	4	16	8	20	24	8	20	8	4	0	0	8	0	8
9.475		16	16	4	8	12	24	4	12	20	0	24	20	8	4	12	16	16	20	12	12	16	8	12	4	8	12	12	16	28	16	12	12	16	12	4	16	8	12	20	4	16	8	4	8	8	12	12	20
9.5		12	24	0	4	12	16	4	12	16	0	16	20	12	4	12	8	16	12	8	12	20	16	12	8	12	8	20	16	28	24	8	12	8	12	12	12	8	24	28	4	8	12	8	16	16	16	12	28
9.525		20	20	12	12	4	20	4	16	12	0	20	20	8	4	12	8	12	20	4	16	20	12	8	16	8	8	20	8	24	16	4	16	16	12	16	4	4	20	28	4	8	12	20	12	12	16	4	20
9.55		20	24	16	12	16	28	4	20	12	0	20	16	4	4	8	12	20	16	8	8	20	8	8	12	8	12	16	4	16	12	4	20	12	8	4	8	4	16	20	12	8	12	16	8	12	8	16	12
9.575		16	28	4	4	16	28	4	12	12	4	16	16	0	4	4	12	20	8	8	8	20	8	12	8	4	16	28	8	20	4	4	24	0	12	12	12	8	12	16	8	4	8	4	4	8	12	20	8
9.6		8	24	16	0	4	24	4	8	12	4	20	16	0	12	12	12	16	8	8	8	12	4	12	8	4	16	32	12	24	12	12	24	8	16	24	8	16	8	16	0	16	8	0	8	8	20	8	16
9.625		8	12	28	4	8	28	0	8	16	8	20	28	8	12	8	12	16	12	8	8	28	0	8	8	8	16	24	8	28	16	12	24	8	8	12	16	16	16	24	4	20	4	0	8	8	16	16	16
9.65		16	12	20	8	16	20	4	12	20	16	12	24	16	4	0	16	16	24	8	12	28	8	4	8	8	20	16	8	20	4	4	12	16	8	8	28	4	16	36	4	16	0	0	8	4	16	20	16
9.675		8	20	20	8	8	16	8	16	16	12	4	16	16	12	12	8	20	28	4	12	20	12	8	8	4	20	16	12	12	16	4	8	16	12	12	28	4	20	28	8	12	0	8	16	4	16	12	24
9.7		8	24	16	12	0	28	4	12	24	16	12	16	12	12	12	8	16	24	0	12	28	8	16	0	4	20	20	12	20	20	12	12	8	4	16	20	16	16	16	8	16	8	8	16	0	16	20	20
9.725		16	24	8	20	0	32	4	8	24	16	16	12	12	8	8	8	4	24	12	16	24	8	12	4	12	20	24	8	16	16	12	12	12	4	16	12	12	16	32	8	28	12	4	16	4	12	16	20
9.75		12	24	12	12	8	20	8	16	8	4	12	12	16	8	12	8	8	36	12	12	16	12	8	8	12	16	20	8	8	20	4	12	16	8	4	12	4	24	44	12	24	4	8	12	16	12	8	16
9.775		8	24	20	8	8	20	8	20	16	8	12	24	12	8	12	8	8	36	0	4	20	12	8	4	8	24	16	12	12	24	12	16	12	8	16	12	8	20	32	8	16	4	8	4	16	12	12	12
9.8		12	12	24	12	8	20	4	20	28	8	16	16	4	8	12	4	12	24	4	4	20	8	16	4	16	20	16	12	16	20	8	16	4	8	16	16	12	16	32	8	12	4	4	8	16	16	12	16
9.825		8	8	20	4	16	20	0	16	24	4	12	12	8	4	8	12	20	16	8	12	24	8	16	4	12	12	12	12	16	20	8	16	8	8	8	24	16	16	32	4	12	8	8	12	16	16	4	24
9.85		8	16	12	8	12	24	8	16	16	8	20	20	16	8	4	8	12	20	16	16	24	12	4	12	4	4	8	12	16	20	12	16	8	12	16	16	16	28	32	0	24	12	8	4	8	12	12	28
9.875		16	16	12	12	4	16	12	24	24	4	24	16	8	16	8	0	20	24	20	8	12	16	16	12	8	12	12	4	16	12	4	4	12	8	20	12	12	32	36	0	24	8	4	8	12	16	12	20
9.9		16	16	12	4	8	24	4	20	24	8	16	16	4	20	12	8	16	20	12	8	12	12	24	8	8	16	16	4	16	16	8	4	8	4	16	20	16	24	32	8	16	8	8	16	24	20	0	16
9.925		12	16	8	16	12	32	4	12	12	20	8	16	8	12	4	8	12	20	8	12	20	12	16	8	16	8	24	4	16	20	16	16	8	12	12	12	12	28	32	8	20	8	8	8	16	16	0	20
9.95		12	12	12	20	12	24	12	8	16	28	12	24	12	8	16	4	20	24	12	12	24	12	12	4	12	16	24	8	20	20	8	16	8	12	12	12	4	20	32	4	24	12	8	4	4	12	0	16
pb1a, firing rate (Hz)
exposure cond.	E2-hexenal
n		5					9									9									9									9									9
stimulus, 2-butanone (log[conc.])		solvent (0)	solvent (0)	solvent (0)	solvent (0)	solvent (0)	-10	-10	-10	-10	-10	-10	-10	-10	-10	-9	-9	-9	-9	-9	-9	-9	-9	-9	-8	-8	-8	-8	-8	-8	-8	-8	-8	-7	-7	-7	-7	-7	-7	-7	-7	-7	-6	-6	-6	-6	-6	-6	-6
time (s)
1.025		12	12	16	8	4	12	8	16	20	8	8	8	4	28	20	25	12	16	12	4	0	4	20	4	4	8	20	4	4	8	16	20	16	8	24	20	12	8	12	4	16	8	16	12	28	8	15	12
1.05		16	16	20	12	8	16	8	16	28	8	4	8	4	24	12	20	12	12	0	4	10	8	24	4	8	8	24	4	8	8	16	24	12	8	12	20	4	4	8	4	12	8	12	20	12	12	5	16
1.075		16	20	16	12	8	20	12	16	24	12	0	16	0	24	16	20	20	20	4	4	15	4	16	12	12	4	24	8	4	4	12	20	20	12	8	16	4	0	16	12	16	16	12	12	16	4	10	12
1.1		12	12	8	8	4	20	4	16	20	8	4	24	0	28	16	25	20	24	16	8	10	4	16	20	8	8	16	12	0	4	16	16	8	12	8	24	8	0	8	16	32	20	8	12	20	4	10	16
1.125		24	16	4	12	4	20	8	8	20	8	4	12	4	24	12	15	12	20	12	4	5	8	16	8	8	12	16	12	8	4	20	28	24	12	4	28	4	4	12	8	28	16	4	20	12	4	5	12
1.15		28	24	16	8	4	12	12	20	24	8	8	8	16	20	24	10	12	20	0	4	5	8	20	8	4	8	20	8	8	4	12	28	24	8	8	16	8	4	12	4	20	12	4	20	16	4	10	4
1.175		16	28	16	0	0	8	8	20	24	8	12	16	16	20	24	5	16	20	4	12	15	4	20	12	4	16	20	12	0	0	12	16	16	8	20	16	12	0	4	4	24	12	4	20	20	8	5	8
1.2		12	24	8	4	4	16	8	12	24	12	4	12	4	24	20	10	16	24	8	8	15	8	20	4	8	16	28	12	4	4	16	16	20	4	16	20	4	4	12	4	32	20	8	24	20	8	5	4
1.225		12	12	16	4	4	12	8	8	20	12	8	8	4	20	16	15	12	20	8	0	0	8	24	0	4	8	24	0	4	16	12	24	24	8	12	24	4	12	8	4	28	16	4	16	12	4	10	8
1.25		12	0	16	0	8	12	12	8	16	8	8	12	12	28	8	15	8	8	8	4	10	8	24	0	0	8	20	8	0	12	8	20	20	12	12	28	8	12	12	4	24	8	4	16	24	4	10	16
1.275		12	16	16	8	12	16	12	20	28	8	4	12	12	32	12	10	8	24	8	12	10	4	28	0	8	12	24	8	4	8	8	20	12	4	16	24	4	4	16	8	36	16	4	16	28	8	15	8
1.3		8	24	12	16	8	16	4	20	20	4	8	12	12	28	8	10	12	24	8	12	5	8	36	4	12	12	20	8	8	12	4	16	20	4	20	20	4	0	8	8	28	8	4	4	20	4	15	0
1.325		8	8	12	12	8	20	12	12	16	0	8	16	16	32	8	10	12	16	4	8	10	8	32	4	4	16	16	16	4	8	4	16	32	8	20	20	4	4	12	8	24	0	4	8	20	8	20	0
1.35		8	8	20	8	8	16	16	20	20	8	4	12	8	32	16	15	8	24	0	8	5	0	28	4	0	16	20	8	4	4	8	24	28	8	16	24	8	8	12	4	24	4	0	16	24	16	15	4
1.375		12	8	28	4	8	16	8	20	28	12	4	8	8	28	16	15	8	20	4	12	10	4	24	4	0	4	28	4	4	8	4	16	12	12	8	28	8	4	8	8	12	20	4	20	36	8	10	4
1.4		12	4	16	8	12	16	12	16	36	8	4	4	16	24	16	15	16	24	8	8	15	4	20	0	0	8	32	8	4	12	0	12	16	20	12	24	8	0	8	8	12	16	4	16	28	4	15	4
1.425		12	8	4	8	8	12	12	16	24	16	8	4	20	28	16	15	16	24	8	0	5	8	20	4	8	8	24	4	4	8	4	12	20	16	8	20	12	4	8	4	24	12	4	16	24	8	5	16
1.45		16	8	12	8	8	16	0	8	16	16	12	12	12	28	16	10	12	28	8	8	10	8	12	8	8	16	20	8	0	8	12	16	12	8	4	28	8	4	12	4	32	12	8	20	28	12	5	12
1.475		20	8	8	8	12	16	4	12	20	8	12	12	12	24	12	15	16	20	12	8	15	4	20	12	0	20	20	8	4	8	8	28	16	12	12	20	8	0	8	0	20	8	4	24	24	8	10	8
1.5		20	16	12	12	12	12	4	12	20	8	8	4	16	20	20	15	20	24	12	4	10	12	36	20	8	12	20	0	12	8	0	28	24	8	12	24	8	4	8	4	16	12	0	28	16	4	5	12
1.525		8	20	12	16	8	12	4	8	28	4	4	4	4	28	24	20	16	32	8	8	20	12	28	16	12	8	24	8	8	8	4	24	16	4	8	24	8	8	12	4	28	8	4	16	20	8	5	8
1.55		8	16	12	12	12	8	16	16	28	8	8	8	4	32	16	20	24	16	12	4	15	12	20	12	4	8	24	8	4	12	12	20	12	8	16	16	16	4	12	4	20	8	12	12	32	12	5	8
1.575		16	8	16	8	16	12	20	20	16	16	4	12	4	20	16	15	28	20	12	0	0	12	28	8	4	12	20	8	8	8	16	20	20	4	20	24	12	8	16	8	12	16	12	12	24	12	0	8
1.6		12	12	8	4	8	8	12	16	24	8	12	8	0	16	12	10	12	24	4	0	0	12	24	4	12	16	16	8	4	0	8	24	20	8	12	20	4	12	12	12	16	20	8	4	24	8	0	12
1.625		4	16	4	4	4	8	8	8	28	8	12	4	4	20	24	10	4	20	4	4	5	12	20	12	16	16	20	4	4	4	4	20	12	12	20	16	4	8	8	12	24	16	4	8	28	12	5	12
1.65		8	16	8	0	4	8	12	12	28	8	4	8	12	20	28	15	8	16	12	4	15	8	24	8	8	12	20	12	8	16	8	16	16	12	20	24	8	8	16	4	24	12	8	16	20	16	10	8
1.675		20	20	24	4	8	20	12	16	28	4	8	16	8	28	20	15	16	16	8	4	10	8	20	0	12	8	16	8	4	12	12	24	28	16	8	28	8	4	12	8	16	4	8	16	12	12	10	12
1.7		12	12	24	8	8	32	16	12	24	8	8	12	4	32	24	10	16	24	0	8	5	8	20	4	12	4	20	4	0	0	8	28	28	8	4	20	4	8	0	8	16	4	0	20	24	12	5	12
1.725		8	20	16	4	4	12	20	12	20	4	12	0	4	32	20	5	12	28	4	4	10	4	20	12	4	12	24	4	8	8	8	24	16	0	8	8	4	8	8	0	20	8	4	20	28	12	5	8
1.75		16	20	20	0	0	8	12	8	20	4	8	4	4	28	12	10	4	32	8	0	15	4	16	16	16	20	20	0	8	12	8	28	8	4	16	20	4	4	16	8	20	16	8	16	16	12	15	8
1.775		12	12	12	4	12	8	20	8	28	8	4	8	8	28	8	20	12	28	12	0	15	8	20	12	12	24	20	8	0	4	0	24	16	4	16	32	8	4	12	16	20	20	8	20	16	16	15	8
1.8		16	16	12	8	12	4	20	8	16	8	12	8	8	32	12	20	16	20	8	8	10	4	24	8	4	20	24	12	12	4	8	20	24	8	16	20	8	0	12	8	24	12	12	20	20	8	10	16
1.825		16	8	28	8	0	4	16	12	16	4	12	16	12	24	16	10	8	28	4	12	5	0	20	12	4	12	20	4	12	4	12	28	16	16	28	20	16	4	16	4	20	12	12	20	24	8	10	12
1.85		12	12	20	12	4	8	12	16	28	4	12	12	12	20	16	5	8	32	4	8	0	8	16	12	0	20	20	4	0	4	8	24	12	12	24	16	12	4	16	8	16	16	8	20	28	8	10	8
1.875		16	16	4	8	8	16	4	16	20	12	12	0	12	20	8	5	12	20	8	8	5	8	24	8	4	20	16	4	8	8	16	16	20	8	12	16	0	4	8	8	16	24	8	12	24	4	5	12
1.9		20	8	12	4	4	12	8	16	20	12	8	4	12	24	4	10	12	20	16	4	10	0	24	8	4	12	20	0	8	12	16	16	20	8	12	28	0	8	8	8	12	12	12	16	24	16	0	4
1.925		12	8	16	8	0	12	8	12	16	12	8	8	4	24	16	10	16	24	8	4	5	0	20	8	0	8	20	0	0	16	12	12	8	4	8	20	4	4	8	8	20	0	8	16	32	20	10	8
1.95		12	12	12	12	4	12	12	8	24	8	12	8	8	28	20	10	28	20	16	12	10	0	28	8	8	12	16	0	4	8	12	16	8	4	8	12	8	8	8	4	28	0	0	8	24	12	10	8
1.975		16	12	8	12	12	12	12	12	28	4	12	16	8	32	20	5	24	20	16	8	15	0	20	4	8	16	16	4	8	12	8	20	16	12	4	24	4	8	8	0	32	4	4	12	16	12	5	0
2		12	8	16	8	8	16	8	16	20	12	8	16	8	32	16	0	16	24	4	8	5	8	16	0	4	8	16	8	4	12	12	20	20	8	8	24	0	8	8	8	20	8	8	16	16	12	5	8
2.025		16	8	20	4	0	16	8	8	24	12	12	8	12	24	8	0	12	20	12	16	10	8	32	4	8	4	24	4	0	8	12	20	28	4	12	16	4	8	16	8	12	12	4	16	12	4	5	12
2.05		12	12	12	4	0	12	4	12	24	12	16	8	8	20	8	0	16	16	12	8	20	4	28	4	4	12	20	4	16	8	12	12	20	4	8	16	12	0	20	0	24	8	8	16	16	4	10	8
2.075		16	8	16	8	8	8	8	16	16	12	12	4	16	24	16	5	12	28	4	12	15	4	24	4	0	12	24	12	16	0	12	12	16	4	4	16	8	4	12	4	28	4	12	20	20	4	10	12
2.1		16	8	16	8	8	4	8	16	16	0	8	16	12	28	24	5	8	24	8	12	5	4	24	8	8	8	28	8	4	8	8	12	24	4	8	16	4	4	4	12	20	8	8	16	28	8	20	8
2.125		16	8	12	4	8	0	4	12	20	0	12	16	4	24	20	0	12	12	8	8	5	12	20	8	12	12	24	4	12	16	12	20	16	4	16	12	8	4	8	8	16	12	4	16	24	8	15	8
2.15		20	12	12	0	12	8	4	12	16	8	8	4	8	20	16	0	4	24	12	12	5	12	20	12	8	12	20	4	12	8	16	28	12	12	12	16	12	16	8	0	20	16	4	16	20	0	0	8
2.175		8	16	20	4	8	12	8	16	24	12	0	4	12	24	16	5	4	28	12	8	5	8	24	16	12	12	20	4	4	4	8	24	20	8	8	20	12	20	4	8	20	12	4	16	28	4	5	4
2.2		4	4	20	4	16	12	12	12	24	8	12	4	8	24	20	10	12	16	4	12	10	8	24	12	8	4	16	12	8	4	4	24	16	8	12	16	8	12	4	12	16	8	4	16	24	8	15	8
2.225		4	4	24	0	16	12	12	16	20	8	12	8	0	20	28	15	12	20	4	8	10	4	16	12	0	8	20	16	8	12	12	16	20	16	8	20	0	8	8	4	12	4	4	12	28	12	10	12
2.25		8	12	20	0	4	8	12	12	20	8	0	12	4	20	28	15	8	28	0	4	5	8	20	12	4	12	28	12	4	16	12	8	20	8	8	28	4	12	8	8	16	4	0	12	28	16	15	16
2.275		12	12	12	0	0	20	4	4	16	12	12	16	4	16	16	15	12	20	12	8	10	8	24	16	8	12	32	4	8	12	4	8	12	8	12	28	4	12	4	8	24	16	4	16	20	8	15	16
2.3		8	12	8	0	4	24	8	4	20	8	16	8	4	20	12	20	12	24	12	8	10	0	32	16	12	8	28	0	4	20	8	16	20	12	8	16	0	8	4	8	28	12	4	12	20	0	5	12
2.325		4	20	12	4	4	12	16	8	20	4	4	4	8	32	16	20	12	24	8	8	5	0	20	12	12	8	20	0	0	12	12	28	16	4	4	20	0	12	12	12	24	12	0	12	24	4	10	8
2.35		8	16	12	4	0	12	20	20	16	8	12	4	8	24	20	10	8	24	12	8	10	4	20	12	4	16	24	4	0	8	4	20	16	4	8	28	0	8	12	4	16	16	0	20	16	8	5	16
2.375		12	8	4	0	0	16	12	24	24	8	12	4	4	28	16	10	12	24	8	4	15	12	32	12	0	16	16	8	0	20	0	12	24	8	12	24	4	0	8	4	20	4	4	20	16	4	10	12
2.4		12	8	8	8	4	12	8	12	28	8	0	12	16	32	8	25	12	16	8	4	5	8	16	12	0	8	16	12	4	12	4	20	16	8	8	20	4	4	8	12	20	4	4	20	16	0	10	4
2.425		16	8	12	12	16	16	8	12	28	8	4	12	16	16	8	20	4	20	4	8	5	0	20	4	4	16	24	12	8	4	4	24	4	12	16	20	8	12	8	8	24	8	0	16	8	0	0	12
2.45		20	8	12	4	12	16	8	16	28	8	8	12	0	12	24	5	12	16	0	12	5	0	32	8	8	16	20	8	8	12	0	20	0	8	16	24	12	16	4	0	28	8	4	12	20	0	10	12
2.475		20	8	16	0	4	8	12	8	24	4	8	12	8	16	24	15	20	12	12	8	5	8	36	12	4	12	16	4	4	12	0	16	4	8	12	20	12	8	8	8	20	16	12	12	20	0	10	8
2.5		12	4	20	8	4	8	4	12	16	0	8	4	12	16	12	15	12	24	16	8	15	12	32	4	4	16	20	4	4	4	8	16	8	8	12	24	16	0	16	8	12	16	8	16	16	4	15	12
2.525		8	8	12	16	8	8	16	16	16	8	12	4	8	24	8	5	0	20	12	12	15	8	28	8	4	12	20	8	8	12	16	24	12	0	12	24	12	0	16	8	16	8	4	20	20	8	20	12
2.55		4	8	8	12	16	8	20	16	24	8	8	4	8	28	8	15	8	16	8	8	5	12	32	20	0	8	24	8	4	16	8	28	16	0	16	20	8	8	12	16	20	4	8	24	16	4	10	12
2.575		8	8	4	4	12	12	4	16	24	4	8	12	12	24	12	20	20	24	8	12	5	12	24	16	0	8	28	4	0	8	0	24	20	4	20	28	8	8	4	8	16	8	4	20	16	4	5	8
2.6		24	16	8	8	8	20	0	16	28	4	8	12	8	24	12	25	16	24	8	8	10	4	24	8	4	8	24	12	0	12	4	28	20	4	16	20	4	0	4	4	16	16	4	8	24	4	10	0
2.625		16	16	16	12	8	16	8	16	20	4	4	0	4	20	8	20	8	28	8	8	10	8	32	8	4	8	20	16	0	20	8	20	12	0	8	12	4	4	8	8	20	16	12	16	20	8	15	12
2.65		4	8	16	8	4	12	12	8	24	4	8	8	12	24	20	15	12	24	12	8	20	8	28	8	8	8	20	8	4	16	8	12	8	4	12	16	8	8	8	8	20	12	8	24	16	8	5	12
2.675		4	0	8	8	4	16	4	16	28	0	8	12	8	32	32	20	16	20	4	8	15	8	24	8	8	12	24	12	8	12	4	24	16	12	16	20	4	4	8	4	28	4	0	8	20	0	0	4
2.7		8	8	12	8	8	12	0	16	20	8	8	8	8	24	16	15	24	24	8	8	5	8	24	8	0	16	20	12	4	16	4	28	28	8	20	20	0	8	4	4	24	8	4	12	24	4	0	8
2.725		12	20	20	8	4	4	4	4	16	16	16	16	8	24	12	10	16	24	12	4	10	4	24	8	0	16	20	4	0	12	8	28	24	4	16	24	4	8	4	4	12	12	4	16	28	8	5	12
2.75		16	12	16	4	4	8	8	12	16	8	12	12	4	24	16	10	12	16	4	4	5	8	28	8	0	16	28	8	4	16	8	28	16	4	12	20	4	20	8	4	20	4	0	20	24	4	10	8
2.775		16	4	12	8	4	12	4	12	24	12	4	4	8	16	20	10	20	20	0	8	0	4	24	12	0	20	28	12	8	24	4	24	12	0	16	12	4	24	4	8	24	4	8	20	16	4	10	4
2.8		12	16	12	8	4	12	0	12	28	16	12	8	12	24	24	15	12	24	4	8	5	4	24	16	4	16	16	4	4	16	0	16	16	4	16	20	12	8	16	8	24	4	16	16	16	4	15	12
2.825		12	16	24	0	4	16	16	12	20	8	12	4	8	32	20	15	8	24	4	4	15	8	32	12	8	12	16	4	4	16	4	16	16	8	12	28	8	12	20	4	32	4	16	12	20	0	15	12
2.85		12	8	20	0	4	16	16	4	24	4	12	4	8	24	8	5	12	20	4	12	15	12	20	8	12	12	28	20	8	16	4	20	12	8	16	24	0	12	4	8	24	8	12	12	16	4	10	16
2.875		16	20	16	8	12	16	4	12	28	8	12	12	8	20	4	15	8	24	4	8	10	12	12	8	12	12	24	16	8	4	0	20	20	8	16	20	4	8	4	8	16	4	12	20	16	4	5	12
2.9		16	24	20	8	12	12	8	12	20	4	4	8	12	32	8	15	12	32	4	0	5	4	20	8	8	16	12	4	4	4	0	24	24	4	12	16	12	4	12	4	16	8	16	16	12	4	10	4
2.925		16	12	12	4	4	12	12	12	20	4	12	8	16	32	16	5	16	12	4	0	5	0	24	12	8	16	20	4	0	12	8	28	12	4	12	20	16	8	8	4	24	12	12	8	16	4	10	4
2.95		20	12	12	12	4	16	24	20	20	8	16	20	4	20	24	10	16	16	4	0	5	0	20	8	4	16	32	4	8	8	12	28	20	4	12	24	8	16	4	0	32	12	8	12	20	4	5	0
2.975		16	12	16	12	8	8	16	16	20	8	12	12	8	24	20	10	20	24	4	4	15	0	24	16	4	12	32	4	8	12	4	20	24	4	16	20	0	12	8	4	20	12	8	20	16	8	10	4
3		16	8	12	8	8	8	4	12	16	8	12	16	8	28	16	5	16	16	0	4	15	8	32	20	8	16	20	12	4	12	0	16	4	8	16	24	8	8	12	8	16	8	12	12	20	4	10	12
3.025		28	8	12	8	4	12	8	20	20	8	8	16	8	24	16	15	16	16	4	4	5	8	24	12	12	12	12	16	4	8	0	20	0	8	12	16	8	4	12	12	24	8	8	16	28	4	15	8
3.05		16	12	24	4	4	4	4	12	28	8	8	0	12	28	12	15	20	16	8	12	15	4	32	16	8	0	24	12	0	16	4	24	8	4	8	12	8	0	4	8	32	16	0	16	24	8	10	4
3.075		12	12	20	4	12	8	0	16	24	12	8	8	8	32	12	5	24	16	12	8	20	4	32	8	8	16	20	8	0	8	12	28	12	4	16	24	12	8	12	4	16	16	4	4	16	8	5	8
3.1		16	8	12	4	8	16	8	20	20	12	8	12	4	24	12	10	16	16	12	4	15	0	24	8	8	20	24	0	4	4	8	24	20	12	12	16	4	8	16	4	12	8	8	16	20	4	15	8
3.125		8	8	8	0	12	12	16	8	24	8	8	12	0	24	4	15	24	24	8	4	5	0	16	20	0	8	24	4	4	4	4	16	24	8	12	12	0	0	8	4	20	16	4	16	24	0	15	8
3.15		12	8	8	0	12	12	8	4	20	4	4	16	8	32	12	10	16	32	12	0	5	4	20	16	0	16	16	4	8	4	8	24	12	4	16	24	0	4	8	12	28	16	4	12	24	4	10	12
3.175		16	4	24	0	0	12	4	8	20	4	4	8	8	24	20	20	0	28	12	4	10	4	24	4	4	12	24	0	8	8	8	24	12	12	12	24	4	4	16	8	24	16	8	16	24	8	5	12
3.2		8	0	20	4	4	8	8	8	28	8	16	4	12	24	8	30	4	24	8	8	5	0	24	12	4	8	24	0	4	12	8	20	16	8	20	20	8	8	16	8	12	20	4	8	28	4	5	4
3.225		0	4	16	4	8	12	4	16	20	4	12	4	12	24	8	20	12	24	8	4	0	4	36	24	12	8	24	4	8	12	4	16	20	0	12	20	4	8	8	8	16	8	4	16	28	4	10	4
3.25		12	12	16	0	4	20	0	16	24	4	12	0	4	24	12	15	8	16	12	0	10	4	28	16	12	4	20	8	12	12	8	20	12	8	4	24	8	0	8	4	16	4	8	20	28	8	10	12
3.275		20	8	8	4	4	16	0	12	24	4	16	4	8	24	16	10	4	24	12	0	15	4	20	4	0	8	16	8	8	16	12	28	8	8	4	20	8	0	8	4	28	12	8	8	24	8	10	8
3.3		16	12	8	4	8	12	4	16	20	4	8	12	4	24	20	20	16	28	8	4	10	8	24	4	4	16	16	8	8	8	8	24	12	0	4	20	0	0	4	8	28	12	8	16	24	12	5	0
3.325		16	16	12	4	4	16	8	16	16	12	12	16	4	24	16	20	16	20	12	12	10	12	24	8	4	12	28	4	8	4	8	20	12	4	4	12	0	8	4	4	16	8	4	16	28	12	10	4
3.35		12	8	20	8	8	20	20	16	12	16	12	16	8	12	16	10	12	24	8	12	10	12	24	16	4	4	24	8	0	4	12	20	20	4	4	20	0	8	12	0	16	8	0	8	24	4	15	8
3.375		8	12	24	4	12	24	20	16	24	8	8	12	8	20	16	5	16	28	4	4	20	4	28	20	8	8	20	16	0	12	8	24	20	8	12	28	4	0	12	0	16	4	8	16	16	8	10	4
3.4		12	16	12	8	8	24	12	16	24	4	16	8	8	32	12	0	8	28	8	0	20	4	28	12	8	8	28	8	4	12	4	16	16	8	8	16	12	4	8	0	20	8	8	12	16	12	5	4
3.425		16	8	12	8	4	16	16	8	20	12	8	8	4	28	16	5	8	24	4	4	10	12	24	12	8	8	16	4	8	0	0	16	20	4	8	24	8	4	16	8	20	8	8	16	24	16	0	8
3.45		8	8	20	12	0	8	8	8	20	12	4	16	8	32	12	5	20	24	4	4	10	8	20	12	4	4	12	16	4	8	8	20	12	12	8	28	0	4	16	8	16	4	16	12	28	12	10	12
3.475		4	16	12	12	8	8	8	20	20	0	12	16	8	28	4	5	16	28	8	4	5	4	16	8	4	0	16	12	0	8	12	24	8	8	0	20	8	4	4	0	20	12	16	8	24	0	15	12
3.5		8	8	8	12	8	20	16	16	24	0	16	12	0	20	8	5	8	28	8	4	5	8	24	12	4	8	24	12	4	4	4	20	12	12	4	20	12	4	8	8	20	16	8	12	28	4	5	12
3.525		4	4	8	12	4	16	12	8	24	0	12	12	4	28	8	10	8	28	8	0	10	12	40	12	4	8	24	16	4	12	8	8	12	12	16	24	12	4	12	12	12	8	0	4	24	4	0	8
3.55		4	4	12	8	4	16	12	16	24	0	8	12	4	28	16	10	8	24	8	4	15	8	32	4	8	8	28	4	4	12	20	16	28	0	28	20	12	4	8	8	16	12	0	8	20	8	5	8
3.575		12	8	20	8	8	24	16	12	28	4	8	12	8	20	20	5	12	20	8	4	15	4	16	16	4	8	28	8	4	12	16	24	20	4	24	16	4	4	4	12	28	20	0	20	36	8	5	8
3.6		12	16	20	4	12	20	16	12	24	16	8	4	8	20	20	15	20	28	4	4	10	8	20	16	4	0	20	8	0	16	8	24	8	4	20	16	4	4	8	12	20	20	0	16	32	8	10	4
3.625		12	12	20	8	4	12	12	24	20	12	4	0	8	28	16	15	12	20	8	12	10	4	24	8	8	4	24	8	0	12	8	16	8	0	16	24	8	4	16	16	12	16	4	12	20	8	10	4
3.65		4	12	16	4	0	12	12	16	16	4	8	0	8	36	12	5	12	16	8	8	5	4	32	12	4	8	20	16	4	4	4	12	8	0	16	28	12	4	12	16	24	12	4	20	20	4	0	12
3.675		8	16	12	4	4	16	12	16	20	8	8	8	0	32	12	10	12	20	4	0	15	8	28	8	8	16	16	12	4	0	12	28	8	4	12	28	12	4	8	4	24	12	4	12	20	8	10	12
3.7		8	16	12	4	4	16	16	12	24	4	0	12	4	20	8	15	4	20	8	8	15	4	20	4	12	20	28	12	4	4	16	24	12	8	8	20	12	0	8	4	20	8	8	8	24	4	10	4
3.725		8	12	16	0	4	20	12	8	24	12	0	16	8	20	16	10	8	24	4	8	10	4	24	12	8	16	20	16	8	8	4	20	12	8	20	20	8	8	4	12	16	12	8	16	28	0	10	8
3.75		8	16	20	4	4	20	0	12	24	16	8	16	16	24	28	5	8	24	0	4	15	4	24	16	8	8	20	8	4	8	4	24	12	8	20	20	12	12	4	8	16	12	4	12	20	12	10	8
3.775		8	12	16	8	0	16	4	16	20	8	12	4	16	28	20	10	12	28	0	8	5	4	32	16	4	4	28	12	0	4	8	20	20	4	12	20	16	12	4	0	16	12	4	20	24	12	5	8
3.8		12	4	12	4	0	12	8	16	28	16	8	4	12	40	16	15	20	24	8	4	0	12	28	16	8	8	20	16	0	12	4	16	24	8	16	20	8	12	0	0	12	12	4	16	16	8	5	4
3.825		12	8	12	0	8	12	8	16	32	12	12	8	12	28	28	10	20	24	12	0	0	8	28	4	12	4	28	8	4	16	8	20	12	8	20	24	4	4	4	0	24	12	8	4	16	8	5	4
3.85		12	12	4	0	8	12	8	16	28	4	12	4	4	20	28	10	16	24	8	4	15	0	24	8	4	8	20	8	4	12	12	20	8	0	16	16	12	4	12	0	28	4	8	12	20	4	5	12
3.875		12	8	12	4	0	16	8	8	24	8	8	4	0	36	16	10	8	20	4	4	15	4	24	16	4	8	16	12	8	12	8	12	20	4	16	12	16	12	12	4	28	4	12	12	16	8	5	20
3.9		8	8	20	4	4	12	8	12	20	4	12	8	0	28	8	10	12	28	4	4	10	4	24	16	8	0	12	8	8	8	8	16	16	8	20	12	4	12	4	4	28	8	12	20	20	4	5	12
3.925		8	8	16	8	12	4	4	12	28	4	12	12	4	24	12	10	12	32	8	16	15	0	20	20	8	0	16	12	12	4	8	16	12	8	24	24	4	8	0	4	20	8	4	24	16	0	0	8
3.95		12	4	16	8	8	4	8	8	28	16	8	20	8	24	16	5	12	24	4	12	10	4	24	16	8	8	32	12	16	4	4	24	16	4	24	24	12	8	4	8	20	12	4	8	16	4	5	8
3.975		12	8	16	0	0	16	8	4	20	12	12	12	16	20	12	10	12	16	0	4	15	4	24	12	4	12	24	8	8	8	12	24	12	12	12	24	12	8	12	4	12	12	4	16	12	8	5	4
4		8	4	12	4	8	20	0	4	28	8	12	4	16	28	8	10	8	28	4	4	10	4	20	12	4	16	20	12	8	8	12	32	12	16	12	24	4	12	8	0	16	4	4	20	24	8	0	8
4.025		4	8	12	4	12	20	0	8	28	12	4	4	12	16	16	5	12	28	12	0	10	20	20	16	8	20	32	8	8	12	0	24	24	8	20	20	4	8	0	8	24	8	8	16	32	12	5	8
4.05		8	20	12	4	4	16	8	16	32	4	8	12	12	20	20	5	8	16	8	0	15	16	28	24	8	8	24	4	4	16	4	16	20	4	12	32	12	4	0	12	20	16	8	20	12	12	10	4
4.075		4	12	20	12	4	8	12	24	20	4	12	20	8	36	8	15	8	12	0	4	5	12	32	12	12	8	16	8	4	8	12	20	12	8	16	20	16	8	8	8	28	12	8	12	20	4	5	0
4.1		8	0	28	8	4	8	12	12	20	12	4	8	12	28	12	15	8	20	8	4	5	12	32	4	8	12	28	12	8	4	8	12	12	12	20	20	12	8	8	8	20	16	8	8	28	4	15	4
4.125		8	4	20	0	4	8	12	12	32	8	8	4	12	12	24	10	8	24	16	0	15	4	28	8	0	12	28	4	4	8	8	24	12	8	12	28	8	4	8	4	4	20	0	12	24	8	15	4
4.15		8	4	8	4	4	8	12	16	20	8	12	8	8	20	16	15	8	24	8	0	10	8	20	4	0	8	20	4	4	4	12	28	16	12	20	20	4	8	12	0	8	8	4	16	24	8	0	4
4.175		8	16	16	4	0	8	16	12	16	12	4	8	12	32	12	20	8	28	4	0	5	8	20	0	4	4	20	12	16	12	4	24	20	8	24	16	4	12	4	8	12	4	8	8	16	8	0	8
4.2		4	20	24	8	8	8	12	20	20	8	0	8	16	28	16	15	16	20	4	4	10	12	20	8	8	12	28	8	16	16	0	28	20	4	16	24	16	12	12	16	24	12	12	0	16	8	0	8
4.225		8	16	12	12	8	12	4	16	28	8	4	8	20	28	12	5	20	16	4	4	10	8	24	16	4	8	16	8	0	8	4	24	12	4	24	32	16	8	20	12	32	16	12	16	24	4	0	8
4.25		8	12	20	12	0	12	8	8	28	4	4	12	16	32	20	5	16	20	4	4	10	8	24	8	4	4	16	8	8	4	4	20	16	4	16	20	8	0	8	4	20	12	4	20	24	8	10	8
4.275		12	12	20	8	8	8	8	12	24	0	4	16	16	28	16	5	12	16	12	12	10	8	20	12	4	12	16	4	16	4	0	24	16	8	8	20	4	4	8	4	28	20	0	12	24	12	10	8
4.3		16	12	16	4	8	12	0	20	28	0	8	12	16	20	8	10	16	24	16	12	15	0	24	24	0	12	20	12	12	16	4	20	12	12	12	20	4	4	12	4	24	16	0	16	32	8	5	12
4.325		20	12	28	8	4	20	8	20	24	4	12	4	12	20	16	10	16	20	12	4	15	0	20	24	4	8	24	8	4	12	8	16	20	16	16	24	4	4	12	0	16	4	4	16	28	8	15	16
4.35		16	12	20	4	8	12	12	16	24	8	8	8	8	32	12	10	8	16	16	8	15	0	24	20	8	16	16	0	4	4	4	20	12	12	16	20	8	4	12	4	24	12	4	12	16	4	15	16
4.375		20	16	12	4	4	16	12	20	28	12	8	12	12	32	12	10	8	20	8	8	15	4	16	12	4	12	20	12	16	8	0	20	8	16	16	16	8	0	8	8	24	16	4	8	20	8	5	8
4.4		16	12	16	20	8	24	12	16	24	12	8	4	12	24	20	5	16	16	4	12	10	8	16	16	0	12	16	12	12	8	4	12	8	12	12	24	8	4	8	8	12	8	8	12	28	8	0	4
4.425		8	8	20	20	12	16	8	12	24	8	4	12	12	24	24	5	12	20	12	12	5	4	24	16	4	16	24	4	4	8	8	16	16	16	12	20	12	4	8	12	16	8	4	8	20	8	10	8
4.45		8	12	28	8	4	12	4	16	24	4	12	16	12	32	12	10	4	20	16	8	0	4	20	20	8	12	24	12	8	8	8	20	12	16	24	28	8	0	12	8	24	16	0	0	24	8	20	16
4.475		20	8	28	8	0	8	0	20	24	8	12	8	8	24	4	10	8	20	8	4	5	12	24	24	12	16	16	12	4	8	4	24	12	4	12	24	8	8	12	4	20	16	0	4	28	0	10	12
4.5		24	8	20	4	4	20	4	16	24	8	4	12	12	24	16	10	12	20	4	4	10	16	16	16	8	16	16	8	4	8	12	28	16	4	4	20	8	12	4	4	20	16	0	4	20	4	0	8
4.525		12	16	12	4	8	20	4	20	20	0	12	12	8	20	20	5	16	24	4	16	20	8	20	16	8	16	20	16	4	16	12	12	12	4	8	20	8	16	8	4	20	16	0	8	16	8	10	16
4.55		12	20	12	12	4	12	8	20	20	8	16	4	0	24	16	15	8	20	4	16	15	4	28	16	8	24	24	12	4	16	0	16	16	4	8	20	12	16	12	4	20	8	4	8	20	8	15	8
4.575		20	20	16	16	0	12	12	12	28	8	4	4	8	28	12	20	4	20	8	8	15	8	28	12	8	20	20	4	4	16	4	28	20	0	8	28	8	12	4	0	24	4	12	16	24	4	10	16
4.6		20	12	12	12	0	16	16	16	24	8	12	20	16	20	16	10	8	24	8	4	15	12	32	8	8	12	24	16	0	16	8	16	12	4	16	16	4	8	12	4	24	12	8	20	24	4	10	20
4.625		12	12	12	12	0	16	20	12	12	12	16	20	8	24	20	10	8	16	12	4	5	12	28	8	8	16	24	12	8	4	8	8	12	4	16	20	4	4	24	12	16	16	0	8	28	8	5	4
4.65		16	16	12	16	8	12	12	16	20	4	8	8	12	28	16	10	20	12	12	12	10	4	28	8	16	16	20	0	16	4	8	16	12	4	12	24	8	12	12	8	20	12	4	8	16	8	5	0
4.675		8	8	12	8	8	12	12	20	32	4	12	8	16	24	12	15	16	20	12	12	5	4	28	12	12	12	24	8	16	8	8	16	16	4	12	20	16	8	0	8	24	20	8	20	12	8	5	8
4.7		4	12	12	16	4	8	16	12	24	4	16	4	12	28	20	15	16	16	8	20	5	8	32	16	8	16	20	8	12	8	12	20	24	4	12	28	12	0	4	8	20	16	4	32	24	4	0	8
4.725		12	12	8	16	4	16	16	12	24	0	12	8	12	28	20	5	28	20	4	20	15	4	24	12	8	16	20	4	4	4	8	20	16	4	24	20	12	4	8	0	12	12	4	16	24	0	5	8
4.75		12	12	8	8	4	12	8	16	28	4	8	12	8	16	12	5	16	28	8	12	15	0	16	8	8	16	28	12	4	0	8	16	12	12	20	16	8	12	8	4	8	20	4	12	24	4	10	12
4.775		8	20	8	12	4	12	4	24	24	8	8	4	8	20	16	15	12	16	16	8	15	4	28	12	4	24	24	16	8	12	12	12	20	16	12	24	4	8	16	12	20	12	0	12	20	4	5	12
4.8		16	12	12	8	4	24	12	32	20	12	4	12	12	24	24	30	16	24	12	0	15	8	24	16	8	16	20	16	4	12	8	16	20	8	16	20	8	4	12	12	24	16	8	4	20	0	5	8
4.825		16	4	12	4	4	16	12	20	20	8	8	24	16	16	24	30	12	28	4	12	5	12	24	24	8	4	28	8	12	0	4	28	20	12	24	12	20	4	0	4	20	16	12	8	20	0	10	12
4.85		12	8	12	4	4	8	8	8	20	8	8	16	12	24	16	15	4	20	8	12	0	8	32	16	0	0	24	0	12	8	4	20	16	12	24	20	16	0	8	8	24	16	4	12	24	4	10	16
4.875		16	12	16	16	4	16	4	16	24	16	4	16	8	28	12	15	12	20	8	4	5	8	32	12	4	4	20	8	0	16	12	24	12	4	12	24	4	16	8	12	24	24	4	8	20	8	10	4
4.9		16	8	12	12	4	16	12	12	24	8	8	12	8	32	16	20	20	24	4	4	10	12	20	12	8	12	20	8	0	8	16	20	16	0	12	24	4	16	8	8	24	16	12	12	24	4	10	8
4.925		12	8	8	0	4	8	12	4	28	0	12	8	8	36	12	10	16	28	4	0	10	4	20	8	8	8	16	4	0	8	8	24	16	4	12	32	8	16	20	4	16	12	8	16	24	4	5	8
4.95		8	12	8	0	4	8	12	16	20	4	4	12	12	32	8	10	12	16	4	4	10	8	24	12	8	0	24	8	8	16	8	24	12	8	12	20	8	16	12	0	12	8	4	12	16	4	5	4
4.975		16	16	16	4	4	16	12	20	16	4	0	12	12	28	16	25	4	16	4	8	5	8	24	4	4	4	16	12	12	12	16	12	16	8	8	16	0	8	4	8	20	12	8	16	24	4	15	16
5		12	20	16	8	4	20	8	20	24	4	0	8	4	24	16	25	4	24	0	4	10	4	28	0	0	12	16	12	4	4	12	20	20	8	8	24	0	20	4	16	28	20	8	8	24	8	10	20
5.025		8	16	12	8	8	12	12	20	20	8	4	4	8	24	16	25	12	28	0	4	10	4	24	12	4	12	28	8	4	8	8	12	20	4	12	24	4	16	8	16	32	12	16	8	20	8	10	12
5.05		8	16	16	12	4	4	8	20	32	8	4	16	8	20	16	25	12	28	4	4	0	4	20	20	4	12	24	8	4	12	4	8	16	8	16	20	4	20	8	8	20	8	12	8	20	4	15	4
5.075		8	16	8	16	4	8	8	20	32	8	8	16	12	16	12	25	4	24	4	0	5	8	24	20	0	16	24	4	8	12	8	16	8	8	24	28	4	16	4	4	20	16	8	12	16	4	10	4
5.1		12	12	8	8	4	8	12	20	20	4	12	4	12	28	12	30	16	24	0	12	10	8	24	16	4	16	20	12	8	12	12	20	12	8	20	28	4	0	4	8	24	28	12	24	20	12	10	16
5.125		12	8	8	4	0	0	12	16	24	12	4	12	0	32	16	25	16	28	8	12	10	12	20	20	4	12	12	20	0	8	12	24	16	12	16	20	0	4	4	12	32	24	16	28	24	12	15	16
5.15		12	8	12	12	4	12	4	16	24	12	8	16	0	32	20	15	8	24	8	0	10	12	24	24	4	8	20	12	0	4	4	24	16	4	16	20	0	4	12	8	28	12	16	24	24	8	10	4
5.175		12	8	20	16	4	16	4	24	20	0	12	4	4	28	16	10	12	28	8	4	15	4	28	20	8	8	28	12	0	12	8	20	8	8	16	16	4	4	8	0	16	16	12	20	28	20	15	8
5.2		16	4	20	12	4	8	12	16	28	4	8	4	16	16	20	10	12	28	8	12	15	4	28	12	12	20	20	12	4	16	8	16	8	8	12	24	4	4	4	0	20	20	12	16	28	20	10	12
5.225		20	4	24	12	4	12	12	16	28	12	4	12	12	28	16	10	20	16	4	8	10	12	16	12	8	24	20	8	4	4	0	12	16	0	16	20	4	4	8	8	16	12	8	12	28	8	5	4
5.25		24	8	12	8	4	20	8	20	16	12	4	8	4	24	16	10	16	16	8	0	10	12	16	20	8	16	24	8	0	4	4	16	16	4	20	16	4	4	12	8	16	8	4	8	24	8	10	4
5.275		16	12	12	4	4	16	12	12	8	8	8	8	12	24	16	10	12	24	8	4	5	4	20	16	12	12	24	4	0	4	4	20	20	8	20	24	0	0	8	8	32	12	0	4	20	8	5	12
5.3		4	24	20	8	8	16	12	8	24	12	16	20	12	28	12	10	16	24	12	8	5	0	16	20	8	16	16	4	8	0	8	20	16	4	20	24	8	4	8	12	20	24	8	8	16	16	0	16
5.325		12	16	12	12	12	16	8	16	24	8	16	12	8	32	20	10	12	16	20	8	15	0	24	12	4	20	24	8	8	8	12	16	12	0	16	20	8	4	12	4	20	24	12	8	20	12	5	12
5.35		20	4	16	8	8	4	8	16	24	12	4	4	16	28	20	20	8	24	12	8	10	12	24	8	0	20	28	4	8	16	4	24	16	4	12	20	4	4	12	4	36	16	4	4	20	4	10	4
5.375		16	4	24	12	12	8	4	16	28	12	8	16	16	16	12	25	8	20	8	4	5	16	16	8	4	12	20	4	8	8	0	20	20	16	12	20	4	12	8	4	28	12	4	12	20	4	20	0
5.4		12	8	20	16	8	12	4	20	24	4	16	16	8	20	16	15	12	24	16	4	5	8	24	4	8	4	20	12	0	8	4	20	24	12	16	24	4	12	0	0	20	4	4	20	20	4	15	0
5.425		16	16	20	8	8	8	4	16	28	8	20	8	8	32	12	10	16	32	12	16	10	4	24	16	4	12	16	8	8	12	12	20	12	4	12	16	4	12	12	0	16	0	4	8	24	8	10	8
5.45		16	12	28	8	12	4	8	12	20	8	12	16	4	32	12	10	12	16	8	12	10	4	24	20	0	20	20	12	8	4	16	16	16	4	12	12	0	8	12	4	24	4	8	4	24	4	10	8
5.475		8	8	20	4	12	4	16	12	28	8	8	16	0	24	16	10	4	20	4	0	15	4	28	12	4	16	20	12	0	4	16	28	24	0	12	24	8	0	0	12	20	4	8	8	16	0	5	4
5.5		4	8	16	8	12	12	12	8	24	4	8	4	8	28	12	5	8	28	8	0	25	8	20	8	12	8	24	4	4	4	12	20	16	0	12	20	12	4	8	16	12	4	8	12	20	0	10	4
5.525		12	16	20	12	4	8	12	16	20	4	4	16	12	28	8	10	8	32	12	0	10	12	24	4	8	8	20	12	8	0	12	12	12	0	8	20	4	8	8	8	24	12	8	8	16	0	10	12
5.55		12	16	12	12	0	8	20	24	28	8	4	16	12	24	8	15	4	24	4	0	10	4	32	8	0	4	12	8	8	0	8	20	16	0	16	24	8	4	4	12	28	12	8	4	20	0	15	16
5.575		8	20	12	12	4	12	12	16	20	12	0	0	8	28	8	10	8	24	4	0	20	4	28	12	8	0	24	4	4	8	0	24	16	4	16	20	8	4	4	12	20	12	16	12	24	12	15	4
5.6		16	20	12	12	4	12	8	16	24	8	12	12	4	28	8	10	12	24	8	0	10	12	24	8	16	12	20	8	4	8	12	24	24	4	4	20	4	12	8	4	32	8	16	12	24	12	10	4
5.625		8	12	16	12	4	12	12	20	24	8	16	16	8	28	8	20	16	20	8	16	5	12	24	4	12	20	16	8	4	4	16	24	16	4	4	16	4	8	16	12	28	8	8	12	20	0	10	4
5.65		4	16	24	12	4	8	8	20	16	12	12	12	4	28	4	15	20	12	12	16	5	8	28	0	8	8	20	4	4	8	8	24	16	8	8	20	0	8	12	12	24	12	4	20	24	0	15	8
5.675		8	12	20	12	0	4	4	24	20	8	16	8	0	24	12	10	24	20	16	4	10	8	28	8	8	4	24	8	4	16	12	24	20	8	8	20	4	8	8	8	24	12	8	12	32	8	10	20
5.7		8	8	12	12	4	12	4	20	20	12	12	8	8	28	16	15	20	28	12	8	20	8	20	12	8	4	24	16	0	12	12	24	8	12	16	20	8	4	12	8	16	12	12	12	16	8	5	12
5.725		4	12	8	16	4	16	8	20	20	12	8	16	8	32	12	15	16	28	12	4	10	8	16	20	4	16	20	12	0	4	4	20	8	8	16	24	8	12	12	8	20	8	8	20	20	0	10	4
5.75		0	12	8	16	4	8	8	20	28	12	8	8	0	32	4	10	16	24	12	4	5	4	28	24	0	20	24	4	4	8	12	24	12	0	16	24	4	12	12	8	20	4	8	8	28	0	5	16
5.775		12	8	12	8	4	4	16	16	24	12	4	8	8	24	16	10	20	16	8	12	15	8	24	12	4	4	28	12	4	8	8	24	12	8	20	32	4	8	12	4	20	4	4	4	24	4	0	12
5.8		20	12	20	8	4	8	16	24	16	8	4	8	12	20	24	10	20	24	4	12	10	8	20	16	8	4	24	12	0	8	0	20	12	8	12	28	4	8	4	4	20	12	4	16	28	4	10	12
5.825		12	16	20	12	4	12	4	20	24	8	8	4	4	24	12	5	8	28	8	8	5	4	32	20	8	12	24	12	8	4	4	20	16	0	16	16	4	12	4	4	16	16	8	20	20	0	15	16
5.85		4	16	12	16	4	12	0	16	28	8	8	8	12	20	8	10	8	24	16	8	10	8	28	8	8	8	20	16	8	4	4	20	20	0	28	12	12	8	4	8	20	8	8	16	8	4	10	12
5.875		8	16	4	12	8	12	8	12	24	16	8	4	16	24	8	15	12	28	12	8	15	8	16	0	8	4	16	8	0	8	4	16	16	4	16	28	12	4	0	16	12	12	4	16	20	8	10	12
5.9		12	8	8	4	12	16	12	16	24	12	8	12	8	32	8	15	12	20	8	12	15	4	12	8	16	4	24	12	0	8	8	12	24	4	8	24	4	16	0	8	8	12	4	16	28	4	5	4
5.925		4	4	12	8	12	20	8	20	24	8	4	12	8	28	16	10	20	24	4	8	10	0	28	12	12	8	28	12	4	12	4	24	28	0	16	16	4	12	4	4	12	4	8	16	20	0	10	4
5.95		8	4	4	8	8	8	4	16	24	8	4	12	4	32	20	10	16	24	8	0	15	0	28	12	4	12	28	8	4	12	0	20	12	16	20	16	12	4	16	8	4	8	8	16	20	0	15	4
5.975		12	4	12	4	12	8	0	12	20	12	4	12	12	28	20	15	8	16	12	0	15	4	16	16	4	4	24	8	0	8	4	20	8	16	12	16	8	4	16	4	8	16	4	12	24	4	15	12
6		8	12	20	0	8	12	4	20	24	12	4	4	16	16	28	10	12	20	8	4	15	4	12	8	12	0	20	8	8	12	8	24	20	8	4	20	4	4	12	4	16	16	0	16	24	8	15	12
6.025		12	16	20	4	4	8	8	16	24	4	4	8	8	12	20	5	16	12	8	12	10	4	24	4	16	0	16	4	8	8	8	16	16	8	12	16	8	4	16	8	16	8	8	20	16	8	5	4
6.05	odor on	16	12	20	12	8	8	8	8	20	4	0	4	12	12	8	5	20	20	12	8	5	4	32	8	12	8	20	4	0	8	4	20	12	12	16	20	4	4	12	12	24	12	12	12	20	4	10	8
6.075	odor on	12	8	8	12	12	12	4	16	28	4	4	8	12	24	12	10	24	24	16	12	15	0	24	16	16	8	20	4	0	16	0	20	8	12	16	24	12	4	4	8	20	12	4	12	24	4	20	8
6.1	odor on	4	12	12	4	8	16	4	16	24	8	8	12	4	24	20	20	16	20	12	16	15	4	28	16	8	8	20	4	4	12	0	16	12	8	12	24	20	4	12	8	20	12	0	16	16	8	15	12
6.125	odor on	8	12	16	4	4	8	4	8	24	8	4	4	8	28	16	10	12	20	4	8	5	8	28	12	4	8	20	4	4	8	12	24	20	16	24	20	8	4	16	16	24	8	0	8	24	8	10	16
6.15	odor on	12	8	8	4	4	8	12	4	28	4	0	8	12	32	20	5	16	20	8	12	10	8	28	12	12	16	20	0	8	4	12	28	16	8	20	20	4	0	12	16	16	12	8	16	32	4	25	12
6.175	odor on	12	8	16	4	8	8	16	4	24	0	8	12	4	20	24	10	12	20	8	12	10	12	20	16	8	20	16	16	12	16	4	20	12	8	12	20	12	12	8	12	20	32	16	24	24	8	35	24
6.2	odor on	12	16	20	4	12	8	8	8	20	4	8	8	12	28	16	15	12	20	0	8	5	8	4	12	0	8	20	20	4	16	4	24	16	16	20	24	12	24	12	12	16	32	24	24	28	20	40	36
6.225	odor on	12	16	24	4	4	12	12	16	24	8	0	4	12	28	12	15	16	24	8	8	15	4	28	8	4	16	24	12	4	16	8	16	24	12	20	20	4	16	12	8	12	32	40	36	44	20	60	24
6.25	odor on	12	20	20	8	8	12	12	8	28	8	4	16	8	28	16	10	12	24	8	16	15	4	32	12	12	12	12	8	12	16	8	20	16	12	16	20	12	16	12	8	20	40	44	36	44	20	55	28
6.275	odor on	12	16	12	16	12	12	16	16	28	8	8	16	12	32	20	25	16	24	0	16	10	0	16	8	20	16	20	8	16	16	12	20	20	16	16	24	12	16	16	8	16	44	44	36	40	28	55	36
6.3	odor on	20	16	24	16	12	8	24	20	36	8	8	4	4	24	20	25	12	24	4	8	10	12	28	16	16	16	24	8	12	20	12	20	20	16	24	24	4	12	12	8	12	44	44	36	36	16	55	28
6.325	odor on	20	24	20	12	12	20	28	16	28	4	8	8	8	24	16	20	8	12	8	8	15	12	28	16	12	4	24	16	16	8	0	16	24	16	24	28	8	12	8	16	24	36	36	36	40	20	40	32
6.35	odor on	8	20	8	8	8	28	16	12	16	8	16	12	8	24	12	25	12	20	8	8	10	4	24	20	16	16	20	16	12	12	8	8	28	16	24	32	8	16	8	16	16	24	36	40	44	40	45	40
6.375	odor on	12	20	8	4	8	20	12	8	20	8	12	16	0	20	16	15	4	24	8	8	0	4	24	20	12	16	20	12	4	8	8	20	32	12	20	20	16	16	4	12	12	28	36	32	40	28	45	36
6.4	odor on	20	24	20	12	12	12	24	20	24	0	4	12	8	24	20	15	12	24	8	12	10	0	20	12	16	12	28	12	8	12	0	24	20	12	12	16	16	12	8	4	24	44	32	32	32	24	50	20
6.425	odor on	12	28	28	8	16	12	12	16	20	4	12	8	12	32	24	10	16	24	8	12	10	4	20	12	24	16	20	4	8	12	4	24	12	16	16	20	16	12	12	4	24	40	28	40	32	36	40	16
6.45	odor on	12	24	16	16	12	20	12	12	24	4	12	8	8	24	20	10	16	16	12	8	5	8	24	12	16	16	24	12	8	4	8	24	20	16	24	24	12	16	12	12	24	24	28	32	36	36	35	20
6.475	odor on	12	20	20	20	8	16	20	12	24	0	4	12	0	28	16	20	16	24	8	8	10	16	24	16	8	8	28	12	16	8	12	20	16	12	20	28	0	20	12	8	20	24	24	28	40	36	40	20
6.5	odor on	8	20	24	16	8	8	16	8	24	4	12	12	4	36	12	15	16	28	12	8	15	12	16	16	12	4	24	16	16	12	12	12	24	4	20	20	8	12	8	4	24	28	20	32	32	32	40	20
6.525	odor on	16	20	12	16	16	16	20	4	24	8	16	4	4	28	20	15	20	20	8	8	15	0	20	20	12	16	16	12	16	16	12	16	20	8	20	20	8	8	8	16	24	28	28	36	32	28	35	16
6.55		16	12	12	16	20	16	24	16	24	8	8	8	4	28	24	15	16	16	0	12	5	0	24	20	8	20	12	4	16	8	20	16	12	24	20	24	8	12	8	12	16	36	20	40	36	28	30	20
6.575		16	12	20	20	8	16	20	20	36	12	8	12	4	24	16	15	16	24	8	12	0	4	28	12	8	12	28	4	8	8	16	12	20	16	16	32	12	16	8	8	24	32	8	24	36	28	30	24
6.6		16	16	20	20	4	16	20	20	20	8	12	8	8	24	16	10	24	20	12	8	10	4	20	4	12	8	28	4	16	16	4	12	16	8	20	28	8	16	12	8	20	20	16	16	36	24	30	24
6.625		16	20	16	16	12	8	24	20	20	8	16	12	16	28	16	10	20	16	12	12	10	4	20	12	16	4	20	4	12	12	12	12	24	12	24	16	16	16	16	8	16	20	20	28	32	28	20	16
6.65		12	24	20	8	8	8	16	12	28	16	12	16	16	28	12	10	8	24	8	12	5	8	20	20	12	8	28	4	4	8	16	20	32	8	16	24	12	12	20	8	16	20	12	20	28	20	10	4
6.675		0	24	24	8	12	12	12	20	28	12	12	16	16	32	12	10	12	32	0	8	10	12	24	16	16	8	24	16	8	8	4	36	16	8	4	28	8	4	12	0	16	8	4	8	24	20	10	12
6.7		4	20	28	12	12	12	16	20	24	4	8	8	8	28	8	10	8	28	4	8	10	8	36	16	24	4	12	12	4	8	8	28	16	8	12	20	20	8	4	8	28	8	0	16	16	28	5	16
6.725		12	28	24	16	8	4	12	16	16	16	12	4	4	24	8	0	8	28	4	8	10	0	28	8	16	16	16	8	0	4	12	16	12	4	16	20	16	12	12	12	36	8	0	16	8	24	5	4
6.75		8	20	16	16	12	8	12	12	28	20	12	8	12	20	20	5	16	28	8	8	5	4	20	8	4	20	24	16	8	12	4	16	8	4	8	28	12	4	12	8	24	0	0	12	8	24	10	0
6.775		0	8	16	12	8	20	8	8	28	16	4	16	12	20	24	5	12	20	12	4	10	8	20	16	12	20	24	8	12	16	4	16	12	12	4	28	16	0	16	4	20	0	0	16	8	12	15	0
6.8		4	12	16	16	12	16	8	12	20	16	16	20	4	24	20	5	12	24	12	8	15	4	16	20	16	16	28	8	12	4	4	20	12	8	12	20	16	0	12	0	28	0	0	12	12	4	10	0
6.825		8	12	16	12	12	12	12	16	20	4	12	12	8	28	8	10	12	24	16	8	5	0	12	20	12	8	20	16	12	8	4	24	12	4	20	8	20	0	0	8	12	0	0	8	12	4	5	0
6.85		4	8	12	4	4	8	4	20	24	8	4	4	8	28	12	10	4	24	16	4	0	0	20	8	8	8	16	28	4	12	4	12	12	4	16	16	16	0	8	8	12	8	0	8	12	12	5	8
6.875		0	12	8	8	8	4	4	20	16	16	8	8	8	24	16	5	4	32	12	8	0	8	20	8	0	16	24	32	4	12	4	8	16	4	12	28	8	4	12	4	20	12	0	4	20	20	0	8
6.9		12	20	8	12	8	8	4	20	16	12	8	12	20	28	16	10	12	24	12	12	10	8	20	20	4	16	20	24	4	16	4	16	12	4	8	20	8	12	4	4	16	8	0	4	24	20	5	0
6.925		16	12	12	8	4	12	4	20	20	8	4	8	16	28	24	10	12	24	12	12	10	0	24	20	8	4	24	16	4	12	8	16	8	4	12	24	12	8	12	0	20	8	0	12	24	20	5	0
6.95		8	20	16	0	8	12	12	20	24	8	4	8	8	20	16	15	16	24	12	4	5	0	28	12	8	8	28	16	4	8	12	12	16	4	20	24	16	0	12	0	24	8	0	8	16	12	5	0
6.975		8	24	12	4	8	16	12	20	24	16	8	16	12	24	8	15	12	24	12	4	10	8	36	12	4	8	16	12	4	8	8	20	24	4	20	24	20	4	8	8	24	4	0	8	16	0	5	4
7		4	16	4	8	8	16	12	20	16	12	12	16	12	28	12	10	8	24	8	16	10	8	28	12	0	12	16	12	8	8	4	32	16	8	12	24	12	8	12	8	28	8	0	12	24	4	0	16
7.025		0	12	8	12	8	8	16	12	24	8	16	4	4	24	12	10	8	24	16	16	20	8	20	12	4	16	24	20	8	8	4	28	12	4	12	20	0	12	8	12	20	16	8	4	24	8	5	12
7.05		8	8	16	8	4	16	12	4	24	16	12	4	12	24	12	5	12	20	12	4	15	12	24	8	4	12	20	16	4	8	12	12	20	4	16	24	4	8	8	24	8	12	8	8	20	8	10	0
7.075		8	8	20	8	0	16	8	12	24	8	8	12	20	24	8	15	20	28	12	8	0	4	20	8	8	16	24	8	0	12	8	8	20	8	16	24	4	0	4	16	16	16	0	12	12	4	5	12
7.1		4	12	12	16	0	16	8	16	24	4	8	12	12	28	8	20	8	28	16	8	5	0	16	8	16	12	24	12	4	12	8	12	20	4	16	24	8	4	12	12	24	12	0	12	16	4	0	16
7.125		8	16	12	16	4	12	12	12	28	12	8	8	16	20	16	10	0	24	8	4	10	0	20	0	8	4	20	20	4	12	16	20	24	8	16	16	16	4	16	12	20	4	0	8	20	8	0	8
7.15		4	16	12	12	4	4	12	16	32	8	4	8	16	20	12	10	8	16	8	4	5	8	28	4	8	4	20	16	0	12	16	20	20	20	12	16	8	4	12	12	16	4	0	0	20	12	10	0
7.175		4	12	20	4	0	12	4	16	24	4	0	8	8	28	12	15	12	20	4	8	5	8	28	16	8	4	24	8	0	4	8	16	12	16	16	28	8	8	12	8	12	0	8	12	24	16	15	4
7.2		8	8	24	8	4	8	4	12	24	4	4	4	8	24	16	10	12	28	8	8	10	4	24	16	12	4	32	0	4	4	8	24	8	12	20	16	8	8	4	0	16	8	8	16	12	8	15	8
7.225		8	8	16	12	8	8	8	16	20	4	4	4	8	20	16	20	8	24	8	0	10	12	36	8	20	8	28	16	4	8	12	16	12	16	16	12	4	4	4	12	20	8	0	12	12	0	25	4
7.25		12	8	12	4	8	8	4	8	24	12	0	8	8	20	8	25	12	24	8	8	10	12	32	8	8	4	20	16	0	12	12	20	16	8	12	8	8	0	12	16	20	8	8	8	24	0	20	4
7.275		8	8	16	0	4	8	4	0	24	8	8	8	16	24	16	15	20	16	16	8	10	4	24	8	4	8	20	4	0	12	8	20	8	4	20	20	12	8	8	8	12	8	8	4	24	0	10	8
7.3		0	12	16	4	0	12	8	4	16	12	8	4	12	20	16	20	8	20	12	0	15	0	28	20	8	12	24	4	4	4	16	20	16	4	16	24	12	12	8	8	0	8	0	12	20	0	10	12
7.325		8	16	16	8	4	4	4	16	20	16	0	4	12	20	12	25	16	24	4	0	15	0	24	24	12	12	28	4	8	16	12	24	20	0	8	20	4	4	8	8	20	20	4	12	20	8	10	8
7.35		8	12	16	4	8	12	0	16	16	8	0	8	12	20	20	25	20	24	0	4	5	8	20	16	8	8	20	12	8	16	4	16	16	0	12	32	12	0	4	8	24	16	12	8	20	8	5	4
7.375		16	8	8	4	12	28	4	16	24	8	0	4	8	20	16	25	8	20	4	4	10	12	24	8	0	4	20	16	8	4	4	20	16	4	8	24	16	0	4	4	16	8	8	20	24	0	5	8
7.4		16	16	8	8	12	16	8	20	24	8	0	0	12	16	12	10	8	20	4	4	10	4	28	8	4	8	20	8	4	8	8	24	16	4	12	16	4	12	4	4	28	12	0	24	24	0	10	4
7.425		4	12	8	4	4	4	8	8	20	16	0	8	12	20	12	5	12	24	0	4	15	4	28	8	8	8	20	0	4	4	8	24	16	0	8	32	8	12	12	8	20	8	4	20	16	16	5	4
7.45		8	4	8	4	8	12	12	8	24	16	0	20	8	24	12	10	12	24	0	4	15	8	36	12	8	16	20	8	8	4	0	20	16	4	12	32	8	4	8	12	8	4	8	16	16	16	5	8
7.475		16	12	12	8	8	8	12	8	28	12	8	12	8	28	12	20	16	28	4	4	5	12	28	12	8	16	20	12	8	12	0	28	20	4	16	32	4	4	12	8	16	8	8	8	20	8	5	8
7.5		20	16	16	8	4	12	8	8	28	20	8	4	16	32	8	15	20	20	8	0	5	8	24	12	4	12	24	4	4	8	4	24	16	0	8	28	8	0	16	0	16	12	4	12	16	12	5	8
7.525		8	12	12	4	8	20	12	12	16	20	12	12	12	28	8	5	24	20	8	0	10	8	28	24	0	16	20	4	8	8	4	20	24	4	12	12	8	0	8	8	20	16	4	12	16	4	15	4
7.55		0	12	8	8	8	16	8	12	16	8	12	8	8	24	8	15	20	24	12	8	10	16	28	24	4	16	24	8	8	12	4	16	16	4	20	20	12	0	12	12	20	12	4	16	32	4	15	0
7.575		0	12	16	12	8	16	4	12	20	12	8	4	12	28	0	20	8	20	8	8	10	8	32	12	8	12	20	8	0	12	4	16	12	0	16	32	12	0	12	12	12	4	0	16	20	4	5	4
7.6		4	8	20	4	8	16	8	8	20	12	16	8	8	28	4	20	12	24	4	4	10	4	24	12	8	8	12	12	8	8	0	24	16	12	8	20	4	0	4	12	16	4	4	12	16	4	5	16
7.625		12	4	20	8	8	8	8	8	20	0	12	4	12	16	12	10	12	20	4	4	5	8	20	20	4	12	12	12	12	12	4	12	12	12	16	16	0	0	16	12	16	12	4	12	28	8	10	16
7.65		12	12	20	12	12	4	4	12	12	0	8	8	12	16	20	5	12	20	0	0	10	12	24	12	0	20	20	12	4	12	4	16	16	0	12	20	4	4	20	8	20	8	0	12	16	4	10	8
7.675		8	16	20	12	8	4	0	16	24	4	8	12	8	24	24	15	8	24	0	4	5	12	32	8	0	20	24	8	4	8	4	28	16	4	12	24	4	4	8	8	20	4	0	12	12	4	10	12
7.7		8	16	16	12	8	8	8	16	24	4	8	16	12	24	20	10	20	20	8	4	5	8	24	16	4	12	28	4	12	4	4	24	16	12	20	28	0	4	8	8	16	8	4	12	16	8	10	12
7.725		4	20	16	8	8	12	8	8	20	4	4	16	8	16	12	10	20	20	12	0	5	8	28	16	12	16	32	4	8	4	12	20	8	12	20	16	8	4	12	8	16	8	4	12	20	4	15	4
7.75		4	12	16	8	0	12	0	8	24	4	4	4	0	12	8	15	16	16	4	8	0	8	36	16	8	16	16	12	8	8	12	20	8	12	12	12	8	4	16	16	20	16	4	8	28	4	10	4
7.775		8	8	12	8	4	8	8	16	16	0	12	4	8	24	16	15	20	16	4	8	0	4	28	24	8	8	20	16	8	16	4	20	20	12	0	24	0	8	16	8	20	16	4	4	24	8	5	8
7.8		12	12	24	8	8	8	8	20	28	0	12	12	12	32	16	15	24	20	4	0	0	8	28	20	8	12	24	8	0	20	8	24	16	4	16	20	0	8	16	4	20	16	0	0	16	8	10	12
7.825		20	16	24	12	4	8	0	28	32	4	8	12	4	24	12	20	28	28	4	4	10	16	24	20	8	20	20	8	0	16	12	24	20	4	16	20	4	8	12	12	28	24	8	8	16	8	10	12
7.85		12	16	12	8	8	8	0	16	16	4	4	12	0	20	12	20	24	24	8	12	15	8	24	16	16	16	28	8	0	8	8	24	20	4	4	20	4	4	20	12	20	20	8	8	20	12	15	8
7.875		12	12	12	4	8	12	4	12	24	4	0	12	8	28	12	5	16	24	16	8	10	4	24	16	8	8	24	8	4	4	12	20	16	4	8	16	4	4	20	8	20	16	0	16	16	16	10	8
7.9		16	20	12	8	4	12	4	16	28	12	12	8	8	28	20	5	16	24	16	0	10	12	24	12	4	16	16	16	12	12	16	12	20	8	8	24	8	8	8	8	16	20	8	20	16	12	15	8
7.925		16	24	16	4	4	8	4	20	20	12	12	4	0	24	16	15	8	20	4	0	5	8	28	16	8	12	16	12	8	12	16	20	16	12	8	16	8	8	8	4	12	16	12	4	20	8	20	4
7.95		24	12	16	0	0	8	12	20	20	8	4	8	12	24	12	10	4	24	4	4	5	0	28	20	4	8	28	4	0	8	12	20	12	8	12	24	16	8	20	4	24	4	8	8	12	0	10	12
7.975		16	16	16	0	4	16	8	12	20	4	12	8	16	28	12	10	16	24	8	8	10	0	32	16	12	20	32	4	8	4	0	20	20	8	24	24	20	8	24	4	20	12	4	16	16	0	5	12
8		16	24	16	8	12	12	4	20	28	8	12	8	8	24	8	10	12	28	8	8	15	0	32	20	12	12	28	4	12	4	8	24	16	8	20	20	12	12	12	4	20	16	0	16	20	0	0	8
8.025		16	20	12	8	12	12	8	16	20	12	8	8	4	20	12	5	8	20	8	8	10	4	28	12	8	4	16	4	12	8	8	16	16	4	12	28	8	8	4	12	32	8	0	8	20	4	0	12
8.05		12	16	20	4	12	16	4	8	20	12	4	4	4	24	12	10	12	16	8	8	10	4	28	12	8	8	20	8	8	12	8	20	20	0	12	20	4	4	0	16	20	8	12	8	24	4	0	12
8.075		16	12	16	8	8	12	8	12	28	12	12	8	8	20	12	15	20	16	16	8	15	4	20	16	4	8	16	12	8	16	8	20	20	0	16	8	4	8	16	8	20	12	12	12	24	4	5	12
8.1		12	12	12	12	0	4	12	16	16	4	16	8	16	28	16	15	24	20	12	8	10	12	20	16	8	8	20	8	12	12	4	20	32	4	12	20	8	4	16	4	28	12	4	12	20	4	5	8
8.125		4	8	16	8	0	12	8	20	20	4	8	4	12	28	16	15	16	28	12	8	10	8	24	12	4	8	28	12	4	12	4	16	20	8	8	32	12	4	4	4	16	4	4	16	20	4	0	8
8.15		4	4	12	0	12	12	8	16	24	4	4	4	8	20	16	10	20	24	16	4	10	8	20	8	4	8	24	8	4	12	4	16	16	8	12	28	8	8	4	8	12	8	0	8	20	8	10	8
8.175		4	8	20	4	12	0	12	8	20	0	0	12	4	28	20	15	28	16	4	8	5	8	24	16	4	8	24	4	16	16	4	16	12	8	16	24	16	8	12	12	16	16	0	4	16	4	10	16
8.2		12	8	20	4	8	4	8	12	24	8	4	12	0	36	20	25	28	16	4	12	10	0	24	12	4	4	16	12	12	16	0	16	8	4	24	20	16	12	12	16	20	20	4	8	28	0	5	16
8.225		16	8	16	0	16	4	8	8	28	8	4	12	8	32	16	15	24	16	8	12	15	4	28	12	8	4	20	12	12	4	0	8	12	0	16	20	0	8	4	16	20	16	4	8	24	4	5	8
8.25		8	8	28	4	16	4	4	4	20	8	0	12	12	20	16	10	20	16	4	8	5	4	36	16	4	4	24	8	12	0	12	8	12	8	12	20	0	8	4	8	16	16	4	8	16	4	0	12
8.275		12	12	24	8	8	8	4	12	16	8	4	8	4	24	12	10	12	20	4	4	5	0	28	12	4	0	16	12	4	4	12	12	12	8	12	24	4	12	4	4	16	12	8	8	16	8	5	16
8.3		12	12	20	12	4	8	4	12	20	0	8	12	8	28	8	15	12	20	12	12	15	8	12	16	8	0	24	12	4	12	4	20	12	0	20	20	8	8	8	4	24	16	8	16	16	12	5	12
8.325		8	16	20	8	8	4	0	12	20	4	4	12	12	24	8	10	12	12	8	12	15	8	12	24	8	4	28	16	4	12	4	24	16	0	28	20	4	12	8	8	16	16	4	12	16	4	15	8
8.35		12	16	12	0	8	4	8	20	20	4	0	8	4	32	16	15	8	20	12	4	5	0	16	20	4	8	16	16	8	8	8	12	16	4	12	28	4	16	16	4	16	12	0	4	16	0	15	8
8.375		8	8	12	8	4	12	12	20	24	12	4	16	0	32	16	20	12	28	20	0	0	8	20	12	4	12	20	4	4	12	8	20	20	8	0	28	12	8	20	4	20	20	0	8	28	4	0	8
8.4		12	12	12	8	4	16	8	16	24	12	4	20	0	24	12	15	12	16	12	8	5	8	28	8	8	16	20	8	4	12	4	16	32	12	8	20	8	0	12	20	20	16	4	12	20	8	10	8
8.425		16	12	16	4	4	12	4	12	24	4	0	12	4	20	16	15	16	24	12	12	5	4	32	12	8	8	28	12	4	8	8	16	24	8	16	20	4	4	8	16	20	8	4	12	8	8	10	16
8.45		8	16	16	4	0	8	4	12	20	12	8	4	8	16	12	10	12	28	12	8	5	4	24	16	4	0	24	8	4	16	4	24	16	4	16	24	4	4	12	0	12	12	0	12	12	8	5	16
8.475		8	12	16	0	8	16	4	16	16	8	12	4	4	20	16	5	0	28	4	8	10	4	24	16	0	16	16	12	4	20	4	20	16	8	8	20	4	4	12	4	12	16	8	8	12	4	5	8
8.5		16	12	12	4	12	20	0	12	24	12	8	8	4	24	16	15	8	28	12	8	5	4	28	12	4	16	20	16	0	12	8	16	16	4	8	16	4	4	4	8	12	8	8	0	20	8	5	12
8.525		16	20	12	8	4	16	0	20	12	12	8	8	8	20	8	15	16	20	12	12	5	4	20	12	8	0	24	12	0	8	8	16	16	8	16	20	0	8	0	8	20	16	4	8	36	8	15	16
8.55		12	8	12	4	0	16	8	24	20	8	8	8	4	28	8	5	8	20	8	8	5	8	24	12	8	4	24	8	4	4	8	24	12	8	12	20	4	12	12	8	20	20	8	12	32	0	10	16
8.575		16	8	12	4	0	8	16	12	32	16	8	4	4	28	8	15	8	20	12	12	0	4	24	4	8	8	20	8	12	4	4	20	20	4	8	16	8	8	20	8	16	16	8	20	20	4	5	12
8.6		12	12	12	4	4	0	8	8	20	8	16	4	8	20	12	20	16	24	4	12	0	8	28	4	16	4	28	8	12	8	0	24	28	8	12	20	8	8	12	8	24	12	4	20	20	4	10	4
8.625		20	12	8	4	8	4	0	16	24	8	12	8	4	24	12	15	12	24	12	4	15	12	36	16	12	12	24	8	8	8	4	24	28	8	8	24	8	4	20	8	20	8	0	16	24	4	5	0
8.65		16	8	16	4	4	4	8	20	32	8	0	8	4	24	8	15	8	12	16	8	15	8	28	20	4	20	16	8	4	8	4	20	20	8	12	20	4	0	20	12	24	8	4	16	24	8	5	12
8.675		16	4	16	0	0	0	12	12	20	4	0	16	8	24	8	20	8	20	4	12	5	16	28	20	4	8	32	8	8	8	4	20	20	4	12	20	8	0	8	12	24	16	4	12	28	8	15	12
8.7		16	8	16	4	0	4	4	12	20	4	8	16	8	32	8	20	12	28	4	12	10	16	24	12	0	4	24	4	8	4	12	20	20	8	8	20	12	8	16	4	12	16	4	16	20	12	15	0
8.725		12	12	16	4	8	12	0	12	24	8	12	12	8	32	12	20	12	24	8	12	15	4	20	8	4	12	20	4	4	0	8	24	12	8	8	16	8	8	16	8	12	8	8	16	16	12	5	12
8.75		16	8	8	0	8	12	0	16	20	12	8	12	8	20	12	10	12	20	8	12	15	4	24	16	4	12	20	8	8	4	0	12	12	8	0	16	12	0	12	12	24	8	4	16	28	0	10	12
8.775		8	12	12	0	8	12	8	16	28	12	4	4	8	24	12	10	20	24	4	4	10	8	28	16	0	8	12	16	4	8	0	12	8	8	8	20	12	8	12	4	20	16	8	16	24	4	10	8
8.8		12	8	8	0	16	16	8	12	24	8	8	16	8	28	12	20	16	24	4	4	5	4	32	12	0	8	20	16	0	4	4	16	8	8	12	20	4	8	8	0	12	20	12	12	20	12	0	8
8.825		20	0	8	0	16	16	4	16	20	4	8	20	12	24	4	10	12	16	8	8	5	0	28	12	0	16	24	12	0	4	8	20	16	8	4	16	8	4	8	4	12	12	4	24	24	12	0	0
8.85		16	4	12	4	12	8	4	8	24	8	4	8	8	24	12	10	16	16	4	4	10	0	24	12	0	20	24	8	4	12	4	24	20	4	16	20	12	4	8	4	12	16	0	24	24	12	10	0
8.875		20	12	12	8	8	12	4	16	24	8	8	4	0	24	12	5	8	24	4	0	10	12	12	8	4	12	24	16	4	12	0	12	16	8	24	28	12	0	8	4	24	16	4	16	20	16	15	0
8.9		16	16	12	4	8	20	8	20	20	8	4	8	8	32	8	5	4	24	12	4	5	12	8	16	4	4	24	16	0	4	0	16	16	8	12	20	8	4	4	4	28	12	8	16	24	12	5	4
8.925		12	8	20	0	8	12	12	4	24	4	8	16	12	32	16	10	12	28	8	8	10	4	24	12	4	4	24	4	4	4	0	16	16	4	20	20	0	12	4	0	20	16	4	12	28	12	5	12
8.95		20	8	20	0	8	16	16	12	32	4	12	12	8	36	8	10	12	20	12	4	10	8	32	4	4	12	20	8	4	16	0	8	4	4	16	24	8	8	8	8	20	8	8	12	20	8	5	8
8.975		20	8	8	0	8	28	12	20	24	8	8	8	12	28	0	15	12	12	12	0	10	4	32	4	0	12	28	8	4	12	4	16	12	8	12	16	16	8	8	12	24	8	8	12	20	8	0	0
9		24	4	4	0	12	12	8	12	24	8	4	8	8	12	20	15	20	20	4	4	10	4	20	0	4	12	28	8	4	8	4	20	28	8	16	28	12	12	12	4	16	8	4	8	16	8	5	4
9.025		20	12	12	0	8	12	8	8	24	4	0	12	4	28	24	15	12	24	4	4	5	8	20	8	4	16	20	12	0	12	0	16	20	8	8	28	8	4	12	8	12	4	8	12	16	4	10	16
9.05		12	12	16	0	0	24	20	12	20	4	0	8	8	32	4	15	4	28	8	4	15	4	24	12	0	16	28	12	8	8	8	20	16	8	16	20	8	0	12	8	16	16	12	16	20	8	5	12
9.075		12	8	8	0	0	16	16	12	24	8	0	0	16	20	16	5	12	24	8	4	10	12	24	4	0	16	28	4	8	16	8	20	20	12	16	20	4	4	8	4	12	16	12	12	16	4	10	8
9.1		20	8	8	0	8	8	8	8	24	12	4	8	12	28	20	10	12	20	0	0	10	12	28	4	0	16	20	4	0	16	4	20	16	12	8	24	0	8	8	8	12	8	8	12	20	4	10	12
9.125		16	12	16	0	12	16	24	12	32	12	4	8	4	32	8	20	8	20	8	0	10	8	20	8	4	12	12	12	8	12	8	28	12	4	8	32	8	8	12	8	20	16	8	12	16	4	5	12
9.15		8	20	16	4	8	16	16	12	28	4	4	8	12	24	4	15	8	24	12	0	5	12	28	12	4	4	20	8	12	8	4	32	16	4	20	28	12	4	12	4	28	12	16	12	20	4	5	8
9.175		16	24	12	4	4	16	8	8	20	4	8	16	12	32	8	15	8	24	4	0	20	8	24	12	4	12	24	4	4	4	4	24	20	4	24	20	4	4	8	4	24	0	12	8	20	8	5	4
9.2		8	16	20	4	8	12	8	20	16	4	4	8	4	28	12	15	8	20	4	8	20	4	20	12	8	16	16	8	0	8	8	24	16	0	20	20	4	12	0	4	12	8	4	8	12	4	10	8
9.225		8	16	24	4	8	4	4	20	16	0	0	0	12	20	12	20	8	20	4	12	5	4	16	16	4	16	24	12	4	8	4	20	12	4	16	24	12	8	16	8	8	12	16	12	16	8	5	12
9.25		12	20	16	0	4	8	16	16	24	8	8	8	8	24	16	20	8	16	4	4	10	4	16	16	4	16	28	12	4	4	8	12	8	16	12	20	20	8	16	16	16	4	12	20	16	12	0	8
9.275		12	12	16	0	8	12	20	20	16	16	8	20	0	20	16	5	12	20	8	12	15	4	20	12	8	8	16	12	0	8	12	20	12	12	24	24	16	8	0	8	16	8	0	12	16	8	0	0
9.3		12	8	16	12	8	12	12	12	16	8	0	16	4	16	12	0	8	24	16	12	5	12	24	4	4	8	32	16	4	16	4	24	12	0	28	20	8	8	8	8	12	12	0	12	16	4	5	4
9.325		16	12	16	12	4	8	12	16	24	8	0	4	4	28	8	10	8	20	12	8	10	16	28	8	4	12	32	8	8	12	12	24	8	4	20	16	4	16	12	12	16	12	0	20	12	4	10	4
9.35		20	20	20	8	8	16	12	20	24	8	8	8	4	24	12	10	16	28	0	8	10	12	24	12	8	16	16	12	8	8	16	20	8	8	16	24	8	12	8	12	20	12	4	12	12	4	15	8
9.375		8	20	20	8	16	16	8	24	24	0	16	8	4	20	20	0	16	20	8	4	5	0	16	8	4	16	28	20	8	16	8	24	8	12	16	20	8	4	8	8	16	8	4	12	20	0	20	12
9.4		4	8	16	4	8	12	12	20	24	8	8	0	8	24	20	10	16	12	8	8	10	8	16	12	0	8	20	16	4	12	8	20	16	12	24	16	8	4	12	0	20	12	0	12	20	4	10	8
9.425		12	8	4	8	4	16	20	4	20	8	4	8	8	20	16	10	12	16	4	12	5	12	24	16	8	8	12	12	4	4	8	12	16	8	16	20	12	8	12	8	24	8	0	4	24	4	10	4
9.45		16	16	4	4	4	20	12	8	24	8	12	16	8	28	12	5	12	20	12	8	10	12	20	16	12	16	24	8	8	8	8	24	16	8	4	16	12	8	4	8	12	4	0	8	24	0	20	0
9.475		12	8	12	8	4	20	4	8	28	12	12	12	12	28	12	20	8	24	8	4	10	12	24	12	4	20	28	12	4	12	8	16	20	8	16	20	8	8	0	8	20	12	4	16	16	0	15	4
9.5		8	4	12	12	4	20	4	16	24	8	12	4	4	28	12	15	4	32	8	4	5	8	28	4	4	24	32	8	0	12	8	20	12	4	16	24	12	8	4	16	24	8	4	12	24	0	5	8
9.525		4	16	12	4	0	16	4	20	24	8	12	0	8	24	20	5	8	24	12	8	10	4	20	8	4	20	24	0	4	4	8	32	16	8	12	20	16	8	12	8	20	4	4	4	28	12	5	20
9.55		8	12	8	0	4	0	8	16	20	4	8	16	12	28	24	10	12	12	12	8	15	8	24	12	8	16	16	0	8	4	8	20	20	12	16	24	16	4	12	12	20	8	8	8	24	20	15	16
9.575		12	16	8	0	4	16	8	20	20	4	4	20	8	28	8	10	12	20	8	0	5	16	24	16	12	12	24	8	4	4	8	16	12	8	12	28	16	0	12	20	20	16	12	12	24	8	15	0
9.6		4	24	8	0	4	20	4	16	24	4	0	8	8	20	8	10	12	20	4	4	5	12	20	20	4	12	24	12	0	8	4	16	4	4	20	24	20	0	8	12	16	16	8	16	24	4	10	0
9.625		12	16	12	0	4	4	4	16	20	0	12	8	12	28	12	15	16	24	8	8	5	8	16	16	4	8	20	12	8	16	4	16	12	4	20	16	16	4	0	8	16	8	4	16	12	4	5	8
9.65		12	12	16	4	0	4	8	12	24	4	16	8	12	32	12	20	12	24	4	4	0	4	20	12	8	0	24	12	12	8	12	28	20	4	12	20	4	8	0	8	20	8	8	12	20	8	0	12
9.675		8	4	8	4	8	8	8	4	24	8	4	4	8	20	16	20	8	28	0	0	5	8	20	4	8	4	24	12	4	8	12	36	24	0	12	24	8	4	8	12	24	8	4	12	28	12	15	8
9.7		16	12	12	8	12	12	4	12	20	12	4	8	4	20	16	20	12	28	4	4	10	8	16	16	4	4	24	16	0	12	8	20	20	16	12	24	12	0	16	8	20	8	8	8	20	4	15	4
9.725		12	20	12	8	4	20	4	16	24	8	8	8	4	28	16	10	20	12	8	4	5	4	20	16	8	4	20	12	0	8	8	12	16	16	16	28	12	12	20	12	12	4	8	16	20	0	0	4
9.75		8	12	12	12	4	16	12	12	24	0	4	12	8	28	16	15	20	20	4	0	5	8	20	8	8	12	20	12	0	4	12	16	24	0	16	24	4	12	12	12	12	4	4	20	24	4	10	4
9.775		8	8	20	12	8	20	12	20	24	4	8	16	12	24	16	25	20	24	4	8	5	8	28	16	0	8	20	12	0	0	12	20	24	0	8	20	8	4	4	4	20	8	4	12	24	4	15	4
9.8		12	12	16	4	8	16	12	20	24	12	8	8	8	20	20	10	16	20	4	8	10	8	32	12	0	4	16	16	0	8	8	16	20	4	8	20	12	16	8	4	20	12	0	8	20	0	10	12
9.825		12	12	20	8	8	4	12	16	28	8	0	8	4	24	16	10	16	16	8	0	20	4	28	20	0	12	28	12	4	12	8	16	16	12	8	20	8	16	12	8	20	20	8	8	20	4	10	12
9.85		12	12	24	8	8	20	8	20	24	8	16	4	12	24	8	20	20	24	8	4	10	4	28	20	8	16	28	8	4	8	16	20	16	12	8	12	16	8	8	12	24	12	12	16	24	4	5	4
9.875		12	12	16	8	4	20	12	24	24	8	16	12	8	24	4	10	16	28	8	8	0	12	32	8	12	16	16	16	4	4	12	16	20	4	8	20	16	8	4	4	24	4	4	24	24	0	10	12
9.9		16	12	12	12	4	12	12	20	24	8	4	20	8	20	12	10	12	20	20	4	10	12	20	8	8	12	20	12	8	4	0	20	20	4	4	28	4	8	8	4	20	8	0	16	24	0	20	12
9.925		12	8	8	12	4	12	4	20	20	12	8	12	12	28	12	15	8	24	12	0	15	8	8	8	8	8	20	16	4	8	4	24	16	8	0	20	0	4	4	4	20	12	0	20	16	0	10	12
9.95		12	8	8	12	4	12	8	16	28	8	8	4	4	36	12	15	16	24	4	4	5	4	20	8	8	8	16	12	4	8	8	28	20	8	8	24	8	0	8	4	24	16	0	24	16	0	5	16
ab4a ORN axons (DL5 glomerulus), dF/F
exposure cond.	solvent
n		8								6						8								8								8								8								7
stimulus, E2-hexenal (log[conc.])		solvent (0)	solvent (0)	solvent (0)	solvent (0)	solvent (0)	solvent (0)	solvent (0)	solvent (0)	-12	-12	-12	-12	-12	-12	-11	-11	-11	-11	-11	-11	-11	-11	-10	-10	-10	-10	-10	-10	-10	-10	-9	-9	-9	-9	-9	-9	-9	-9	-8	-8	-8	-8	-8	-8	-8	-8	-7	-7
time (s)
0.242756		-0.100203	-0.0052163	0.0911328	0.0095173	0.0177699	0.144287	0.0383124	0.0629547	0.00935781	-0.0468254	-0.0287287	-0.0195472	0.00499419	0.0725478	0.00695298	-0.0338014	-0.0283904	-0.0220606	-0.0460235	-0.0434548	0.00359377	-0.00571136	-0.00239244	0.0848671	-0.0127144	-0.0664375	-0.0027114	-0.0560726	0.0204892	-0.0261841	-0.0195683	0.0363998	-0.040628	-0.0890692	0.0802473	-0.110502	0.0393988	-0.0357278	0.0364546	0.000264713	-0.0019853	-0.0237064	-0.00410032	-0.0819099	0.068721	0.0111036	-0.000823844	-0.00214178
0.326881		-0.125242	0.0389887	0.0569885	0.0423354	-0.0152589	0.0805911	-0.014024	0.0096478	0.044834	-0.156299	-0.0772753	-0.00874131	0.031096	0.0285828	0.0127084	-0.0255561	0.010685	-0.00348474	0.0329198	-0.0579055	-0.0463032	-0.0350842	0.0522706	0.0547435	0.00810961	-0.0333483	0.0209398	-0.0187431	0.0390583	-0.0657019	-0.014625	0.0329237	-0.0431058	-0.0634733	-0.0408592	-0.0384743	0.0198372	-0.025138	0.0115862	0.00836226	-0.026353	0.000287321	-0.0266669	-0.107956	0.0196254	0.0100855	-0.0414675	0.0451414
0.411039		-0.125465	0.0570065	0.0929338	0.00658223	-0.0199406	0.0814655	0.0428608	0.0442214	0.0213798	-0.0952073	-0.0449214	-0.0327894	0.0285212	0.0257215	0.0106748	0.00242928	0.0197626	-0.0547582	-0.0251075	-0.0276682	0.00843253	0.00966303	0.0428503	0.0878568	-0.0475047	-0.0173038	0.0360605	-0.0857718	0.042047	-0.0544427	0.0110949	0.0216123	-0.0825849	0.00349953	-0.0312739	-0.109459	0.0227037	-0.00924598	0.0304998	0.0837509	-0.0250008	0.0115233	-0.045459	-0.0890566	0.0123584	0.00596943	-0.0654755	0.0520338
0.495164		-0.0777126	0.0232667	0.0198966	-0.0344668	-0.00515826	0.141985	0.0265951	-0.00218549	-0.0369038	-0.0402709	0.0122645	-0.0620821	0.03004	-0.01912	0.032334	-0.0416119	-0.0285343	0.0059686	0.0419109	-0.050865	-0.01098	-0.029455	-0.0152428	0.0469084	-0.0205962	-0.0100919	0.0397874	-0.0293033	0.0666097	-0.0648335	0.0306876	0.00318995	-0.0547129	-0.0291821	0.0206645	-0.0932987	-0.00856302	-0.0114856	0.025667	0.0588368	-0.0337234	-0.0171515	0.000450534	-0.0868462	0.0326529	-0.0051927	-0.0378478	0.0351663
0.579322		-0.0449872	-0.0518776	-0.0411867	0.00226295	0.00435643	0.0850433	-0.0157536	-0.00173844	-0.0596834	-0.109661	-0.0417197	-0.0522927	0.039897	-0.00627681	-0.00482559	-0.049428	-0.0370085	-0.0398047	-0.0516269	0.0480595	0.00572773	0.0196784	-0.0335472	-0.00717481	-0.0412973	-0.000931049	0.0289618	-0.0709437	0.0105754	-0.0390744	0.0407366	-0.0177366	-0.0365949	-0.0367665	0.0133564	-0.0696387	0.0340399	-0.0232329	-0.0624544	0.023496	-0.0107245	0.0733602	0.0512496	-0.112636	0.00178369	0.0585843	-0.0118316	0.0749353
0.663447		-0.0427167	0.00213916	-0.0429716	-0.11066	0.0390511	0.0862412	-0.0139556	-0.0186643	-0.0196876	-0.0784231	-0.0439861	-0.0283571	-0.0158436	-0.0269286	0.0171457	-0.057317	-0.0472395	0.0649766	0.0267332	0.00116212	0.0664778	0.0145815	-0.00185286	0.0151416	-0.0585131	0.0645704	-0.0422161	-0.0685895	0.0175259	0.00974809	0.0390908	0.0125101	-0.00305439	0.000917658	-0.0249737	-0.0467346	-0.0273047	-0.0287495	0.0269697	0.0491247	-0.0269654	-0.000584354	0.00459185	-0.111474	-0.00569943	0.0576511	0.0417517	0.0497728
0.747605		-0.0794007	-0.0097615	-0.0159221	0.012688	0.0157217	0.0777352	-0.0075647	-0.0603556	0.00231394	-0.0886564	-0.000157605	-0.0176116	0.0310319	-0.00532131	-0.0207162	-0.0759686	0.00285118	-0.0704869	-0.00212966	0.0471797	0.0280584	-0.055421	-0.0393947	-0.0015005	-0.00327065	-0.0250921	0.00427985	-0.0783334	-0.0397534	-0.0588933	0.0263459	0.0425894	-0.0191509	0.0529852	0.0236919	-0.101672	-0.0214118	-0.056299	0.00965751	0.0483863	-0.107388	-0.0254691	0.0164912	-0.159677	0.0231607	0.056122	0.0135491	0.0368706
0.83173		-0.0630913	0.00856327	0.0217336	-0.045225	0.00848063	0.0456295	0.0109868	-0.0469255	0.0177856	-0.144525	0.0126232	-0.0469773	0.00827565	-0.0247068	0.00325903	0.00337943	-0.022631	-0.0589364	-0.0263351	0.0130251	-0.0446308	-0.0499837	0.0189458	-0.013604	-0.0132835	-0.00883622	-0.055777	-0.0288065	0.0252853	0.00720223	0.0292607	-0.04278	-0.0951548	-0.0163952	0.0241763	-0.129956	0.00297407	-0.0275008	-0.0221118	0.0654987	-0.116738	0.0371016	0.0278681	-0.180708	-0.0259224	0.0129336	0.00899533	0.00871998
0.915888		-0.0592753	0.0170032	0.0132285	-0.0720572	0.0174786	0.0539219	0.0422742	-0.0145538	-0.0443448	-0.119341	-0.0384697	0.00415658	0.0261191	-0.0210087	0.0196659	0.00216195	-0.0445291	-0.0591403	-0.0232396	-0.00873493	-0.0406841	-0.0247826	0.00431212	0.0442698	-0.0319053	0.0272434	0.0433799	-0.0178437	-0.042387	-0.0260949	-0.0354009	0.0131199	-0.149565	0.0564173	-0.0482788	-0.135582	-0.0139907	-0.0477669	-0.00313314	0.0753062	-0.184238	-0.0801485	0.00664039	-0.117768	-0.0213095	-0.00775481	0.0336356	-0.00163072
1.00001		-0.0589542	-0.0188915	0.0195198	0.0234277	0.0279905	0.0538983	-0.00974171	0.00855023	0.0279278	0.00114953	-0.0312458	0.0600807	0.0332589	-0.0250404	-0.0141824	-0.00563155	-0.0209743	-0.0184555	-0.00955801	-0.102046	-0.0498678	-0.0408191	0.0556687	0.0239659	-0.00716169	-0.0138417	0.0363035	0.005362	-0.00403171	0.0239306	0.00373836	-0.0303724	-0.0584937	-0.0136813	-0.018994	-0.158553	-0.0233333	-0.0312386	-0.0293361	0.0810738	-0.156819	0.0394194	0.00613454	-0.105291	0.0138279	0.00573485	0.02849	0.0391528
1.08417		-0.0196952	-0.0486838	0.0268669	-0.0261111	0.0236153	-0.0254577	-0.00313327	-0.0165802	-0.0132312	0.0240367	-0.0337469	0.0270984	-0.0256928	-0.0324762	-0.0306056	-0.053265	-0.0136697	-0.0320877	-0.040303	-0.0159259	-0.0369287	-0.0139773	-0.00367922	-0.00780621	-0.00677191	0.0342026	-0.0245805	-0.0495318	-0.0215307	0.0289044	0.00585364	0.00309977	-0.0460166	0.0145795	0.0402804	-0.126413	-0.00325102	-0.0504352	-0.0703881	0.0366706	-0.0986068	-0.0910088	-0.0843479	-0.173407	-0.00402421	0.0358432	-0.0429968	0.00409344
1.16833		-0.0679326	-0.0478114	0.0208791	-0.0539243	0.0370768	0.0369354	0.0443725	0.043806	-0.0768855	-0.0310367	-0.00168697	0.0560485	-0.0207516	0.0240342	-0.0329022	-0.10333	-0.0184675	-0.0046642	0.0187987	-0.0401044	-0.0669253	0.00798357	0.0268413	-0.0221271	0.0138329	-0.0116609	-0.0161576	-0.0481223	-0.0523652	0.0449164	-0.00734885	0.0596963	-0.0334329	0.0273257	-0.0883064	-0.127833	0.0179722	-0.0694046	-0.0242169	0.0375307	-0.0471729	0.00027282	-0.0165898	-0.112709	-0.0525243	0.0192918	-0.0476038	0.0315609
1.25245		-0.0373112	-0.0644377	0.0268793	0.0118841	0.0192722	0.00705753	0.0395797	0.0612339	-0.0372466	-0.0379875	-0.0477215	0.0206342	-0.0586587	0.0229218	0.0162204	-0.0726357	-0.0463571	-0.0744941	0.0748467	-0.00580622	-0.023489	0.00160069	0.0235092	-0.0266617	-0.0086037	-0.0330579	0.00886622	-0.041028	0.022265	0.0521008	-0.0291562	0.038386	-0.0297695	-0.047797	0.00949604	-0.0832859	0.00677308	-0.0601968	-0.0743074	0.0571403	-0.00802409	-0.0382457	-0.0200003	-0.11734	-0.0608038	0.0146091	0.0013504	0.0093293
1.33661		-0.0952963	-0.0467512	-0.0243129	0.000353991	0.00811387	-0.00632343	-0.0165097	0.0322779	-0.0258599	-0.0165957	-0.0187225	0.0163939	-0.0584822	0.00788474	0.022988	-0.0959833	-0.0429212	-0.0506857	0.0452125	0.0422315	0.00114032	-0.00547805	-0.0178998	-0.00787524	0.0399218	-0.000847657	-0.0194913	-0.0232856	0.0241447	0.00939387	0.0373081	0.0149767	0.018897	-0.0209498	0.0259649	-0.087099	0.0251978	-0.0475189	-0.0721225	0.019423	-0.0588089	0.00624653	0.00897082	-0.106072	-0.0337809	0.0160894	0.0339692	-0.0238778
1.42074		-0.130656	-0.0162737	-0.0493404	-0.0324862	0.0293129	-0.0196441	-0.0174839	0.00280656	-0.0446508	-0.076377	-0.0348431	0.0266867	-0.0402678	-0.0885752	0.0244423	-0.0672265	-0.0587074	-0.0474853	0.0325964	0.0263939	0.00614823	-0.00112709	0.0294411	-0.0349068	0.0437248	-0.0707843	-0.000265263	-0.024197	0.0117172	-0.0341764	0.00495167	-0.00489702	0.0384536	0.0208773	-0.0296639	-0.0530201	0.0242696	-0.00550917	-0.0427341	0.0330393	-0.022817	0.00294716	0.0136893	-0.131321	-0.0256773	0.0347866	0.0404147	-0.0307523
1.5049		-0.101822	-0.0306817	-0.0228221	-0.0446404	-0.0139919	-0.0122543	0.00499731	-0.00291449	-0.0590993	-0.102987	0.0136856	0.00382683	-0.0740503	-0.0127693	0.0278437	-0.0459722	-0.00462095	-0.039961	0.0171839	0.0362641	0.055923	-0.0400003	0.022594	-0.010189	0.0523595	0.00399226	-0.0372169	0.00854274	0.0274907	0.0574466	0.0566215	-0.0813358	0.0581076	0.0589915	-0.0179481	-0.044593	-0.0165208	0.00822122	-0.0617993	-0.0342026	-0.0585747	0.0087009	0.0571161	-0.0859042	-0.0503811	-0.0254534	0.0189175	-0.0498168
1.58902		-0.00368838	-0.0200929	-0.0265686	-0.0182976	0.00561056	0.00830902	0.0160983	0.0305094	-0.0533492	-0.00835412	-0.0255211	-0.0287929	-0.098539	0.000303332	0.00158273	-0.0589379	0.0300678	0.0799746	0.0141309	0.0222232	0.0167523	-0.0510042	-0.0196819	-0.0298021	0.063346	-0.00253644	-0.0348	0.0537128	0.0294858	-0.00296712	0.05935	-0.0219583	0.0189998	0.0126157	-0.0178639	-0.0329707	-0.0319421	0.0232439	-0.0557315	0.0301135	-0.0462338	0.0248399	0.0291739	-0.051114	-0.103198	-0.0233536	0.064201	-0.0465656
1.67318		0.0258898	-0.0436602	-0.0172291	0.0608989	0.0187893	-0.035125	-0.00771673	-0.053879	0.0200472	-0.0949814	0.0753871	-0.0309489	-0.049901	-0.0507842	0.0623925	-0.0276749	0.0253425	-0.00793238	0.0298111	0.0303643	0.0219915	-0.0166217	-0.023405	0.0166325	-0.00866562	0.0199601	-0.00773881	0.0396066	-0.0085181	0.00792059	0.0989961	-0.00863355	-0.0395982	0.0542702	-0.0540624	0.0310919	-0.015475	-0.0142552	-0.0634392	-0.0178963	-0.100065	-0.00950825	0.0434333	0.0134707	-0.0461964	-0.0968144	0.0396578	-0.0369735
1.7573		0.027013	-0.020608	-0.0377416	-0.00769951	-0.0376951	0.0114824	0.0630964	-0.045757	-0.0468685	0.0169036	0.00517144	-0.0165469	-0.0611105	0.00415117	0.0316511	-0.0663076	0.0419642	0.0445782	0.0602032	0.0474165	0.0433688	-0.0289563	-0.0459149	0.0240486	0.0368001	-0.0120465	0.00303391	0.0426986	0.0596147	-0.0106658	0.0458876	-0.0300012	-0.0634922	0.0181018	-4.37865e-05	0.0727893	-0.00902931	-0.0302286	-0.0425284	-0.019596	-0.0984413	0.0374019	-0.00942124	0.0381267	-0.121269	-0.0358925	0.018764	-0.0520446
1.84146		0.0167959	-0.00277507	-0.0789042	-0.0640566	0.0159894	0.0100221	0.0313571	-0.0841534	-0.0427161	-0.0278595	-0.0178022	-0.0206887	-0.0381768	-0.0417501	0.0465045	-0.0709451	0.0512751	0.0388218	0.0467787	0.0750375	0.00873563	0.0101265	0.0400442	0.034155	0.0550638	0.0209562	0.0342703	-0.0379234	0.0506149	-0.0335283	0.0376317	-0.0553846	-0.117301	0.0280468	-0.000958931	0.139215	-0.0266645	-0.0593055	-0.0656292	-0.0394696	-0.0941148	0.0726086	-0.0784199	0.0247193	-0.125418	0.0371131	-0.0025138	-0.0219452
1.92559		0.0750937	-0.0506961	-0.097788	-0.00901643	-0.0473931	-0.055243	-0.0249569	-0.0518748	-0.0103897	-0.0719439	0.0174653	-0.0805385	-0.0196089	-0.0266291	-0.0210458	0.00259441	0.0659192	0.0752796	0.06755	0.0367135	-0.00405852	-0.0314783	-0.00318267	-0.0105439	0.0631847	-0.000566843	-0.0156932	0.00571965	0.0394693	-0.0420136	0.0362056	-0.0728831	-0.076926	-0.00964507	-0.0211814	0.085978	-0.0584995	-0.0221593	-0.0998195	-0.038944	-0.081575	0.0717437	-0.018723	0.050188	-0.113534	0.0578155	0.0165664	-0.0251023
2.00975		0.09061	-0.0151798	-0.00677678	0.0278301	-0.00319508	0.0115136	-0.0591994	0.00630556	-0.00565631	-0.0450157	0.0256684	0.00933457	-0.0323161	-0.0384042	-0.000767812	0.0176974	0.0604123	0.00670343	0.0165197	0.0831489	-0.0312452	0.0238898	0.00775667	-0.0533001	0.149391	0.0736533	-0.041791	-0.00149749	0.0555134	-0.0207079	0.0182428	-0.0900056	-0.0366203	-0.0591917	-0.0715671	0.00413907	-0.0414948	-0.0964232	-0.0401162	-0.0362151	-0.0686411	-0.008403	-0.0832208	0.0684739	-0.0813192	0.0668232	-0.00191571	0.0248407
2.09387		0.061763	-0.00548839	-0.0728333	-0.00756734	0.029311	0.0148128	-0.0476866	-0.0198419	0.0372421	-0.0317052	-0.0524871	0.0453592	-0.0376344	-0.00264693	-0.0425601	-0.0119845	0.0766762	-0.070608	0.00325964	0.0447405	-0.0549846	-0.0124436	0.00090565	0.0078671	0.172393	0.0845535	-0.0695022	-0.0366327	0.0146155	-0.0692281	-0.0467247	-0.0807328	0.0253015	0.0349058	0.00402448	-0.0393983	0.0185601	-0.102758	-0.075487	-0.0346882	-0.0173958	-0.0801171	-0.0712475	0.0894149	-0.105868	0.0342742	-0.0472179	0.0779647
2.17803		0.0391226	0.0180379	-0.0634619	0.0322404	-0.00304529	0.0583413	0.00797165	-0.0391296	0.000989088	-0.0745577	-0.0179999	-0.00392507	-0.00690835	0.0265395	-0.0549162	-0.00173782	0.0495614	0.0454796	0.00106375	0.0573058	-0.0104272	0.0118784	0.0411683	-0.0724377	0.134173	0.0456966	0.00992636	0.0296981	0.01104	-0.0645127	-0.0509156	-0.0983002	0.0303492	-0.0233314	-0.0170792	-0.028395	0.000456393	-0.0633058	-0.0531737	-0.0470465	0.0168918	0.0950539	-0.0696534	0.0612062	-0.0466577	-0.00264079	-0.0593949	0.0649034
2.26219		-0.00869098	0.0111352	-0.0215765	0.0575873	-0.0125299	0.0482545	0.00120144	-0.0327043	-0.0304722	-0.0906296	-0.00709421	0.0364778	-0.040808	-0.0377193	-0.0505822	0.0528145	0.0642743	-0.0141555	0.0421023	-0.0370732	-0.045359	0.0193954	0.0227774	0.00669444	0.0955017	0.0266508	-0.0152081	0.0853028	0.0201572	-0.0674302	-0.0908085	-0.0336345	0.0413703	0.022629	-0.00506546	-0.0141691	-0.012668	-0.0346306	-0.0294893	-0.0387283	0.00625278	0.0424027	0.00446976	0.0403376	-0.106067	-0.00013696	-0.0420698	0.0809818
2.34631		0.00917342	0.0282043	-0.0555122	-0.00211485	0.00211165	0.0629657	-0.0108707	-0.0147546	-0.0226072	-0.0595306	-0.0343568	-0.025489	-0.0392431	0.00983903	-0.0149111	0.0203503	0.0542657	-0.0147937	0.0717163	0.00808205	0.00597005	-0.0373839	0.068617	0.0711449	0.0464202	0.00694989	-0.0197029	0.0948777	0.0183436	-0.0125918	-0.0580399	-0.0692717	0.0108821	0.0566008	-0.0674425	-0.04498	-0.0184909	-0.0349122	-0.0246284	-0.0298771	0.0125376	-0.0177933	-0.00576144	0.0108146	-0.057678	-0.0295533	-0.0168184	0.0740749
2.43047		0.0377433	0.0270133	-0.0353927	0.002956	0.0332062	0.0472557	-0.0355791	-0.0293424	-0.0175136	0.0133547	-0.0646413	-0.024303	-0.0435458	-0.00562725	-0.0212869	-0.0432889	0.0374428	-0.0555468	0.0227113	-0.027662	-0.0253196	-0.0409018	0.0321801	0.0142355	0.00357922	0.00582059	0.00693768	0.0598309	0.0428306	-0.016632	-0.0372067	-0.0848196	0.0130797	-0.0105509	0.0254515	-0.00698029	0.0469325	0.0348461	-0.0329694	-0.0349511	0.0688957	0.0881433	-0.010106	0.00020123	-0.0807125	-0.0285402	0.0314969	0.0485984
2.5146		0.0405779	-0.00648097	0.018402	0.0147826	-0.0317176	0.0135291	-0.00889964	0.000592495	0.0322013	-0.0159145	-0.0200016	-0.094772	-0.0203794	0.00223696	-0.0324235	0.0334953	0.052995	-0.0168975	0.0130797	-0.0177183	-0.0563452	-0.0491879	0.0113598	0.0228778	0.022953	0.0913556	-0.000719251	0.0390786	0.00308763	-0.09141	-0.0133399	0.00769994	-0.0249299	0.0272862	0.0266398	0.0190321	-0.0530569	0.0117834	-0.00120307	-0.0499524	0.016885	0.0531067	-0.0489933	0.0178999	-0.0773894	-0.017838	0.077896	0.0101389
2.59875		0.000933027	0.029596	0.00736532	0.052921	-0.0399838	0.0224759	0.0204955	0.0199801	0.0355031	0.0115926	0.0168361	-0.0610389	-0.00480813	-0.0374347	-0.030643	-0.0103505	0.04188	-0.00757636	-0.02158	-0.0722321	0.0146867	-0.0186528	-0.0055235	0.037505	-0.039671	-0.0146123	-0.06126	0.0829512	0.0172803	-0.0914084	-0.00625919	0.0116709	0.0113736	0.0219352	-0.034065	-0.0228486	-0.0299362	0.00235301	0.0228634	-0.0592574	-0.026239	0.0772038	-0.0114511	-0.0200099	-0.0209187	-0.00348363	0.0820444	-0.0263445
2.68288		-0.0147561	0.0150383	-0.0371323	0.0625779	-0.0365471	-0.017144	0.0298141	0.0103681	0.0183158	0.015106	-0.0304394	-0.0597049	-0.0487046	-0.0102553	-0.0198776	0.00153923	-0.024622	-0.0628567	0.0003974	-0.0170434	0.0270858	-0.00338516	-0.00449726	-0.0577542	-0.045145	-0.0355719	0.0226507	0.0799112	0.0128685	-0.0287455	0.0130583	0.0151395	-0.0174399	0.0333825	-0.0274154	0.0130436	-0.0750075	-0.0299557	0.0524763	-0.0415904	0.0463816	0.0795089	0.0163726	0.00808245	-0.0244757	-0.0200677	0.0325954	-0.0222802
2.76704		-0.0322066	-0.023804	0.00324474	0.0477201	0.0198456	-0.0304086	-0.0294068	-0.00239859	-0.0111451	-0.00305407	-0.0124855	0.00555731	-0.0421698	0.0384379	-0.00915664	-0.0597711	-0.0168622	0.0111803	0.0247052	-0.0473623	0.000183238	0.0303896	-0.00959608	-0.0174453	-0.0212417	-0.0507701	0.00608721	0.0294715	0.0498745	-0.0535356	0.0245826	0.00922293	-0.0264877	0.025811	-0.0165096	0.00841868	-0.0891564	-0.00890544	0.0420271	-0.0418811	-0.00280775	0.187774	0.00945125	0.0851689	-0.0715903	-0.0601313	0.0392872	-0.0211892
2.85116		0.0101807	-0.0112605	-0.021322	0.0548785	-0.0122497	-0.01518	-0.0294905	0.0480419	-0.0608942	-0.0157986	-0.0146928	-0.0349047	-0.0570456	-0.0186338	0.0111479	-0.0133357	-0.0156728	-0.00812264	0.0601576	0.00500928	0.0467844	0.0226991	0.0316206	-0.0394685	-0.0702981	-0.0463202	0.0624783	0.0597351	0.024544	-0.0276221	0.0216008	-0.00906331	-0.024285	0.0438347	0.0267306	-0.0231355	-0.0450292	-0.0444482	0.0300227	-0.0904298	0.0349859	0.0596085	0.0693313	0.0858459	-0.0252811	-0.0301725	-0.012993	0.0207908
2.93532		-0.0133493	0.00259787	-0.0344482	-0.0411749	0.00970091	0.0329959	-0.00256043	0.0424431	-0.0142558	-0.072072	-0.0358243	0.0640705	-0.0042418	-0.0163748	0.00153258	0.0285793	0.0313226	-0.0133455	0.0512941	-0.0211459	-0.0112452	0.016355	0.0511323	-0.0115797	-0.0632949	0.0357986	0.00437207	0.092449	-0.01918	-0.0666495	0.0233351	-0.0470348	-0.0265927	-0.0336601	0.0346392	-0.0413271	-0.0840962	-0.015618	0.0525707	-0.117178	-0.026656	0.0417475	-0.0109462	-0.0120667	-0.112867	-0.0464069	-0.106358	0.023361
3.01944		0.0229449	-0.00124396	-0.0468427	0.0193044	0.0277643	-0.0183271	-0.0708794	0.0129311	-0.0534026	-0.00641892	0.0207601	0.0209328	0.0306595	-0.0037452	-0.00211752	0.0193512	-0.013161	0.0201622	0.038254	0.0147233	-0.00918205	0.0115876	0.0115994	-0.0664208	0.000688688	-0.0933988	0.0343623	0.0513092	-0.0223263	-0.0388497	0.018732	-0.0437145	-0.072443	0.0745579	0.00479368	-0.0353944	-0.0487755	0.0340412	0.0346112	-0.111584	-0.0258509	-0.0426829	-0.00153612	-0.0909734	-0.0602718	-0.0605428	-0.0899403	0.0344737
3.1036		0.00912299	0.0142672	-0.0396492	-0.00195607	0.0533119	-0.0340449	0.0335535	0.034285	0.0182132	-0.113791	-0.0423357	0.0456427	0.0362063	-0.0299743	0.0173598	-0.0324106	-0.0406795	-0.0239547	0.0185007	0.105415	0.00847631	0.0159881	-0.0110403	0.00602698	0.0262848	0.000171589	0.0396849	0.0041465	-0.0414726	0.0137943	-0.000694975	-0.112858	-0.0417257	0.100118	-0.00123583	0.0072873	-0.0448731	0.0172731	0.0215066	-0.107004	-0.0204737	-0.0407518	0.00744596	-0.0340331	-0.0122994	-0.0247722	-0.108374	-0.00257318
3.18773		-0.0292197	0.00624393	-0.0423425	0.0154808	0.0487746	-0.0297842	-0.0201265	-0.00101914	-0.0160764	0.00300768	-0.010589	0.0349665	0.0505505	-0.0493405	-0.0181809	-0.0213833	-0.0668911	0.000287806	-0.0225087	0.100216	0.0388112	0.0168124	0.00294853	-0.0375934	0.015357	0.0356481	-0.00512283	0.0172571	-0.0339904	-0.0194295	-0.0144359	-0.0666125	0.0174486	0.120392	0.0337424	0.0351306	-0.0130933	-0.0224708	0.104893	-0.0766415	-0.00731688	-0.0194376	-0.0235396	-0.0197376	-0.0358314	-0.013496	-0.0733674	-0.0082282
3.27189		-0.0271648	0.048242	0.00331014	-0.0336738	0.0231996	-0.0339308	-0.0210868	0.0266935	-0.000582407	-0.0329586	-0.0273242	0.000227856	0.0416175	-0.0289117	-0.0192758	0.0558046	-0.0686389	-0.00517619	-0.0166311	0.0617509	0.01322	0.0616747	0.00193169	0.0037008	-0.0894905	-0.0548023	0.0411068	-0.00369849	0.0200813	-0.0387555	0.000640175	-0.0262795	0.06138	0.0775926	-0.0254989	0.106824	0.0227965	0.0235649	0.0747329	-0.0422638	0.0316319	0.00925715	-0.0706337	-0.00318254	-0.0808727	-0.0296461	-0.161393	-0.0332983
3.35601		0.0239121	0.0519356	-0.0482978	-0.0188845	-0.0604968	-0.00402966	-0.00332972	-0.0468485	-0.0567678	0.0267369	0.00909108	-0.0260437	0.0309785	-0.00387336	-0.0229814	0.000375953	-0.0129426	-0.0760671	-0.000709919	0.0326452	0.0393153	-0.00787647	-0.0765288	-0.0465119	-0.0802643	-0.0477725	0.0892523	0.0247876	0.00109635	-0.0330287	0.0043879	-0.0471002	0.0397068	0.0434642	-0.0936216	0.0950619	0.00114358	0.0368223	0.0498732	-0.0381756	0.0074293	0.000426333	-0.0783835	-0.0477861	0.00730387	-0.0109893	-0.0448028	-0.0275693
3.44017		0.0389484	-0.056816	-0.0678536	-0.0655762	-0.0145143	-0.0119318	-0.0145653	-0.00931844	-0.0281633	-0.0390118	-0.0720943	-0.0148932	0.0651547	0.00308278	0.0382423	0.0082629	-0.0784622	-0.0198649	-0.0146002	-0.00835769	0.0269346	-0.0299937	-0.0575081	-0.0105154	-0.00637561	-0.00490973	0.00106888	0.0102388	-0.00685392	-0.0381825	0.00823199	0.0313824	0.0490835	0.025753	-0.116182	0.0471077	0.0207953	0.0293795	0.0414901	-0.018622	-0.0434023	0.0443116	-0.01972	-0.0129129	0.000421108	-0.0175497	-0.00487444	-0.0176428
3.52433		0.0355894	-0.00425461	-0.0295771	-0.00132145	-0.0464178	-0.0502303	-0.0257457	-0.00292128	-0.0769318	0.00568435	-0.042513	0.0335031	-0.00194409	0.0736036	0.0597275	-0.000688111	-0.0571899	-0.0222561	0.0158946	0.0182821	0.045147	-0.0503849	-0.0494393	-0.0509874	-0.00508675	-0.00482153	0.0660643	-0.0268206	-0.0382639	0.0140703	-0.0308615	0.0102615	0.0479135	0.0202322	-0.117609	0.0784515	-0.0393414	0.0409505	0.0752353	0.016599	-0.0358053	0.0191889	-0.0552812	-0.020126	0.0472278	-0.0634028	-0.0168759	0.0250665
3.60845		0.0644263	-0.00900916	-0.0161952	0.028212	-0.00290896	-0.014931	0.0288026	-0.022798	-0.0233081	-0.0423911	0.0268215	-0.00913301	0.0309782	0.0666689	0.0161442	-0.0178329	-0.0172643	-0.0802621	-0.00194945	0.0120915	0.021028	-0.0333897	-0.0272022	-0.0149339	-0.0165715	-0.0638074	0.0209111	0.00359377	-0.0020401	0.0302329	-0.0413814	0.12661	0.0592464	0.0563166	-0.0498632	0.0633088	-0.0479231	0.0451423	0.0317348	0.0337778	-0.0749115	0.00617598	-0.0910551	-0.0370299	-0.0111074	-0.0589014	0.00509013	0.041666
3.69261		0.0907798	-0.0204876	0.0434585	-0.0489496	-0.0242393	0.0139356	0.0007925	0.0378951	-0.0722458	-0.0949286	0.0249599	0.00270478	0.0115445	0.00692824	0.0831951	-0.00695176	-0.056959	-0.025243	-0.00881022	-0.00152428	0.0909376	-0.0222511	0.0188274	-0.0396335	-0.11326	-0.0450862	0.0323151	0.0272023	0.0106726	0.0528033	-0.0748114	0.00418748	0.0458576	-0.0745777	-0.0727348	0.0870582	-0.0401292	0.00273372	0.0264904	-0.041447	-0.0329741	-0.053803	-0.052564	-0.0267755	0.0466872	-0.102785	0.0719622	0.0282887
3.77674		0.0310126	-0.0417669	0.00846935	-0.00704249	-0.0275145	0.0287029	-0.0258187	0.0308249	-0.0486234	0.0678487	0.0111279	0.000926268	-0.00516763	0.0109273	0.043033	-0.0215231	-0.0886906	0.0771048	-0.0470246	-0.00976212	0.0285886	0.00239431	-0.075326	0.00727215	-0.0429941	0.0327618	0.0480452	0.0264839	-0.0277058	0.0352381	-0.0625364	0.0224609	0.0876195	-0.0295616	-0.0502917	0.158171	-0.0361388	-0.018118	0.0205122	0.00716076	-0.000178725	-0.0164606	-0.00855234	0.0467703	0.0318714	-0.101428	0.00408287	0.0430782
3.86089		0.0337261	0.0343453	-0.0157417	-0.0492856	-0.00493032	-0.0182953	0.00542334	0.0431569	-0.00243153	0.0215575	0.0193926	-0.0227678	-0.00673002	-0.0513435	0.029981	0.0219616	-0.0426748	-0.0276922	0.000102227	-0.00966931	0.0275337	0.0197468	-0.00819206	0.0512086	-0.00436651	0.104103	0.0219817	-0.00522985	-0.0705444	0.0555986	-0.0651141	0.025	0.132786	0.0418983	-0.0668727	0.129277	-0.0190343	-0.00427782	-0.020086	0.0128508	0.0222218	-0.0203468	-0.0373106	0.0350401	0.0456856	-0.130121	-0.051878	0.0172196
3.94502		-0.00125264	0.00523607	-0.0350645	-0.0287409	0.0193039	-0.0210185	-0.0284056	0.0206533	-0.0740935	-0.0208322	0.0249249	-0.0271627	0.00201226	-0.0404879	0.0192496	-0.0229619	-0.0808361	0.0195325	-0.0567274	-0.0501254	0.0341299	0.0126748	-0.110165	0.00113215	-0.0066779	0.00368363	0.0052294	0.000630388	0.016074	0.0608458	-0.0753066	0.0765734	0.113742	0.0341714	0.0179019	0.143505	0.00214648	0.00225981	0.0484824	0.0175609	0.01873	0.00401785	0.0643064	0.112614	0.0765913	-0.107947	0.0235847	-0.0127617
4.02918		0.017188	-0.0179819	0.00529244	0.0260788	-0.00381581	-0.00803727	-0.00871494	6.88329e-05	-0.0338001	-0.070301	-7.62041e-05	0.0730761	-0.0279653	-0.0611549	-0.037175	-0.0271369	-0.0752753	0.00197234	-0.00220187	-0.0363553	0.074366	0.0192951	-0.0185293	-0.0165463	-0.00886773	-0.0191709	-0.0432545	0.0134341	-0.0472515	0.0514447	-0.101596	0.0619474	0.0880035	0.0121851	-0.0905684	0.0651547	-0.0440208	0.0129651	0.0362007	-0.00201585	0.0384921	-0.0203634	0.0318777	0.057525	0.0654961	-0.083409	0.0347385	-0.0347438
4.1133		0.0250951	0.0263385	-0.0111675	-0.0581066	0.00986427	0.00590706	-0.0316096	0.00229212	-0.01048	-0.0189691	0.0723691	0.00704939	-0.0443513	-0.0122614	-0.0733242	-0.0243097	-0.0511779	0.0153356	-0.0235857	0.00704045	0.031509	0.00386734	0.0207854	-0.0141382	-0.0904419	-0.0388065	-0.0330799	-0.000376919	-0.0614345	0.0365325	-0.0707262	0.0627885	0.0446936	-0.0282274	0.0295976	0.0447762	-0.0282206	0.0304602	0.0438112	-0.0231777	0.0438914	-0.0470867	0.0679973	0.00909925	0.0411187	-0.0622557	0.0146369	-0.0315634
4.19746		0.0123805	0.00123766	-0.0499269	-0.0451819	0.00614195	0.020355	-0.0197623	0.0216045	-0.0124321	0.0521841	0.00404768	0.0578996	-0.0490403	-0.0409942	-0.0207863	-0.0232696	-0.0120762	-0.0509225	-0.000751921	-0.0292211	0.0575941	0.0262712	-0.0466582	0.0211269	0.00269776	-0.0337404	-0.0137543	0.0100235	-0.0124598	0.068735	0.0175642	0.0451771	-0.0137805	-0.0842666	0.0457423	-0.0424613	-0.0185571	0.0167542	0.053336	0.0361779	0.0322843	-0.0918652	0.0693376	0.149406	0.0262745	-0.0469271	0.0283873	0.00780776
4.28159		0.0407461	0.00179089	-0.072716	0.0216709	-0.0126979	-0.0040389	-0.0522919	0.0171962	0.0412441	-0.0278087	0.043782	-0.0537463	-0.010691	-0.0287755	-0.0430843	-0.00986359	-0.0578711	0.0301098	0.0098686	-0.0620058	0.0890006	0.000791751	-0.0323734	0.00372993	-0.0602615	0.0186399	0.010075	-0.0446385	0.00794378	0.0131306	-0.0476865	0.000101434	-0.0112758	-0.0302808	0.123293	-0.0466895	-0.0512781	0.0287578	-0.0098085	0.000694484	0.0215713	-0.0476141	0.0120518	0.152088	0.0477093	-0.0668714	0.0703133	0.0161039
4.36574		0.050011	0.0384086	-0.043943	-0.00421207	0.00450672	-0.0343243	0.00490027	-0.0280965	0.00432631	-0.0664424	0.0657805	-0.0455507	0.0106768	-0.00495422	-0.0576803	0.0318543	0.0214798	-0.00819436	-0.0245901	-0.058221	0.0454629	0.0316619	0.0682983	0.0272878	-0.00248082	0.00356301	-0.0268146	-0.0712421	0.0239159	-0.0379571	-0.0036469	0.00478208	-0.0119602	-0.0320143	-0.0155412	-0.000707289	-0.0504805	0.0061458	-0.00984431	0.0287062	0.0484826	-0.0336148	0.0779972	0.0648827	0.0983236	-0.0132884	0.0732424	0.0337981
4.44987		0.0398751	0.037726	0.0399318	-0.0754953	-0.0293134	0.00777569	0.0619469	-0.0258033	-0.0352784	0.00354968	0.0652487	-0.0780264	0.000717434	0.0175191	-0.0726339	0.0119483	-0.0441702	0.0620034	-0.0508636	0.00511107	0.0384935	0.0474495	0.0513684	0.00299552	-0.0153582	0.0131439	0.00131726	0.00410955	-0.0229576	0.0363024	0.0407244	-0.00576894	-0.0260342	-0.0990056	0.0091801	-0.0344107	-0.0682092	-0.00963578	0.00734831	-0.00932622	0.0365512	-0.12359	0.118803	0.0753401	0.088094	-0.0249429	0.0320098	0.0327017
4.53403		-0.0146804	0.00142459	0.0135397	-0.0266198	-0.00980667	-0.0359714	0.0437012	-0.0381569	-0.0357732	-0.100372	0.00466036	-0.0805041	0.0276186	0.00704007	-0.0578604	0.0542581	-0.0591262	0.101498	-0.0567711	-0.0359263	-0.0342734	0.011304	0.0154189	0.0230882	0.0656618	0.0483023	0.00488087	0.0493306	-0.0660824	0.0329808	0.0413439	-0.049081	-0.00319229	-0.114358	0.000833223	-0.0756118	0.0106492	0.0120805	0.0212694	0.0297913	0.0676706	-0.138839	0.0933219	0.123044	0.0930567	0.00887176	0.0506613	0.0104561
4.61818		0.00579184	0.000880911	0.0330779	-0.0472365	-0.00564562	-0.0826289	0.0321404	-0.00110696	-0.0389984	-0.0653215	0.0650045	-0.0298804	0.0386197	-0.00120685	-0.016584	0.0561095	0.0147503	0.147495	-0.0492933	-0.0439551	-0.0165445	0.0475415	0.0516186	0.0104461	0.00313773	-0.00698146	0.00668489	0.00105876	-0.0780557	0.0919922	0.048191	-0.0432865	0.0429108	-0.0516072	0.0174342	-0.0850565	0.0216707	0.03046	0.0211006	-0.00406246	0.0803307	0.00425188	0.0792112	0.0839694	0.040251	0.0680869	-0.0700541	0.0237292
4.70231		0.0179572	0.0505109	0.0645137	-0.0405062	0.0102612	-0.0914441	0.055131	0.0102106	-0.111232	0.00461888	0.00863392	0.00169483	0.0231615	0.0247413	0.0565303	0.0408239	-0.0323909	0.169377	-0.0491286	-0.0277074	0.0257239	0.0458678	0.0322572	-0.00952614	0.00632541	0.0271517	0.00997676	-0.0151442	-0.0160337	0.0723687	-0.0225867	-0.0423187	0.0624539	-0.120797	-0.0447414	0.0167069	0.0242084	0.058649	0.0348686	-0.0227443	0.0722466	-0.0472732	0.0436908	0.138405	0.0800696	0.0847916	-0.0138811	0.053847
4.78647		-0.0345628	0.0793499	0.0907442	0.0420018	-0.0020256	-0.0270702	0.0677749	0.037551	-0.0478048	0.14147	0.00358922	0.00480814	0.0461164	0.0237586	0.00178896	0.00185597	-0.0122698	0.104379	-0.044536	-0.0265225	0.00884513	0.0366499	0.0605238	0.0329048	0.0357063	0.0620321	0.0442738	0.0591824	-0.021633	0.0707038	0.0274139	-0.0924038	0.0572866	0.0192142	-0.0207791	0.0520937	0.0297964	0.0445318	0.0720365	0.0282841	0.0460271	-0.0390209	0.0191504	0.125895	0.0764115	0.0964826	0.0482954	0.0207373
4.87059		0.0256063	-0.0204326	0.157861	0.0684899	0.00579758	-0.0570513	0.054915	0.0168426	-0.0631862	0.022765	-0.0084107	-0.00480803	0.019136	0.0347158	0.0376449	0.0432331	0.00804582	0.0614611	-0.0551364	-0.0630697	-0.0161819	0.0158439	0.0494418	0.0759611	0.0260189	0.0414358	0.0636271	-0.0537631	-0.0115952	0.033404	0.010652	-0.0187029	0.0553909	-0.0334889	-0.0774904	-0.00596593	0.0543935	-0.00797597	-0.0256972	0.074399	0.0123586	-0.0489009	0.00658924	0.0681415	0.079406	0.0895569	0.0034215	0.00831114
4.95475		0.0154173	0.0301191	0.1667	0.0263107	-0.0331138	-0.0669954	0.0452642	0.00769491	-0.00130011	0.0994729	-0.053696	-0.0267116	0.0397379	0.0603221	0.0052222	0.0419023	0.0240958	-0.0167023	-0.0553576	-0.0586386	0.0141356	0.0387231	0.0655234	0.0479298	0.0360008	0.0180511	-0.00402732	-0.0799346	0.00400465	0.0343734	0.053304	-0.0241049	0.00904935	0.0425775	-0.0157258	0.00748642	0.0468437	0.0281317	-0.00902961	0.0729694	0.0863295	-0.0820098	-0.0170861	0.071618	0.0657155	0.106286	0.0172826	0.0166607
5.03888		0.0179487	-0.0115467	0.076677	0.0360122	0.0499741	-0.0502232	0.0539808	-0.00418392	0.0623502	0.138135	-0.0297453	-0.0127964	0.0445019	0.0488786	-0.0144956	0.0426442	-0.00376099	-0.038222	-0.0521302	-0.0393401	-0.0210173	0.0551231	-0.0171306	-0.013828	0.0392408	0.0445144	-0.016023	-0.0589046	0.0210815	0.0106484	0.0156813	-0.0226693	-0.016345	-0.0133194	-0.0468293	0.0733763	0.0649421	0.0094735	-0.0386391	0.103186	0.0756462	0.00462978	0.00996075	0.0329627	0.100872	0.0592845	0.0424351	-0.0127909
5.12303		0.0719376	0.0191124	-0.0120989	0.000357898	-0.00139099	-0.0245856	0.0218685	0.052458	0.0867197	0.133588	0.000117577	-0.0187941	0.0499016	0.0363291	-0.00642216	0.0609965	-0.0177852	-0.0119863	-0.0701782	-8.78235e-05	-0.0068729	0.0244297	0.0118515	-0.0249306	-0.033017	0.00910597	-0.0137569	-0.0061623	0.00713964	-0.000527341	-0.0120171	-0.035207	-0.0142357	0.0420006	-0.0318864	0.0148564	-0.0158538	0.00556421	-0.01625	0.0601984	0.0996506	-0.0697887	0.0318859	0.113795	0.0714208	0.0467838	0.0760234	0.00936054
5.20716		-0.00392362	0.0194256	0.00196348	0.0255543	0.0368033	-0.0308108	-0.0111416	0.0162328	0.128398	0.205903	0.0414953	0.0559358	0.0560174	0.0906472	-0.014095	0.0437146	0.0227504	-0.0934075	-0.0432135	-0.00979776	-0.0668519	0.0316641	-0.0399241	0.0239363	-0.00980758	0.0220496	-0.0655546	-0.00021197	-0.0480626	0.0249759	0.00469151	0.0533413	-0.0392007	-0.0486657	0.00979671	0.0530292	0.0116529	-0.000129275	-0.0393774	0.0459333	0.0634469	-0.0502628	0.0208031	0.137943	0.0999069	0.0703109	0.0363702	-0.00292914
5.29132		0.0295639	-0.0137477	0.0550195	0.0250132	0.0252071	-0.00880433	-0.0477962	-0.00104537	0.115224	0.107683	0.0295131	0.0178526	0.0132732	-0.0123979	0.0373492	0.0689366	0.0115079	-0.0140883	-0.0873346	0.0047745	-0.0099911	-0.000268549	-0.000682935	-0.0174835	0.000120705	0.0151712	0.00779006	-0.00649832	-0.042415	0.0492214	0.0197375	0.0756632	-0.00533289	-0.0233241	0.0717245	0.0402955	0.0761541	0.0132273	-0.0373706	0.0046488	0.0802487	0.0157706	-0.00367707	0.161464	0.0807533	0.0346218	0.0496864	-0.0173104
5.37544		0.0371689	0.0411192	-0.00193951	0.0163357	-0.00422283	-0.074124	-0.0343501	0.014557	0.143418	0.0689142	0.150068	0.098182	0.013265	0.0435735	0.0129519	0.054297	0.0485275	-0.0631054	-0.0318663	-0.0349266	-0.0364915	-0.00809361	-0.0382301	-0.0151768	-0.00468535	-0.0309718	-0.0145564	-0.0211193	-0.0170278	-0.00046843	0.0279647	0.130208	-0.0209226	0.013466	0.122703	0.0515595	0.0451101	-0.00467522	-0.0187658	0.0529936	0.103543	-0.0887795	-0.0395971	0.0392745	0.0956459	0.0413805	0.0338783	-0.0231917
5.4596		-0.00665666	-0.00796514	0.0447566	0.0344887	-0.00173725	-0.0788792	-0.0184146	-0.0367332	0.128259	0.0981236	0.0744736	0.105092	0.0681285	0.0108129	-0.00405096	0.0878228	0.0753223	-0.00744333	-0.0351935	0.0211333	-0.00568896	-0.0382069	-0.0338873	0.000815755	-0.0372697	-0.0332413	-0.0393081	0.0237148	0.0110772	-0.016984	-0.0273249	0.111135	0.00160447	0.0473628	0.0857813	0.0876061	0.0616543	-0.0165158	-0.00265018	0.0163099	0.0568052	0.0412522	-0.0341716	0.0745762	0.0432394	-0.0212847	0.00768757	-0.0328394
5.54373		-0.0228677	0.00493852	0.0120723	0.0270851	-0.0030892	0.0162331	-0.023879	-0.0658426	0.0679803	0.156717	0.0517083	0.0528851	0.045706	0.0195043	-0.0153749	0.111186	0.0924157	-0.0565381	-0.0279495	0.0118759	-0.0294275	-0.00758537	-0.016023	0.00595241	0.00630935	-0.102954	-0.100937	0.0378997	0.0133943	0.0231714	-0.00616677	0.105489	-0.0383136	-0.000278087	0.124083	0.117168	0.0451001	0.0135082	-0.00353842	-0.0122897	0.0354895	-0.0531109	-0.0120231	-0.0205609	0.0442283	-0.0200601	-0.0402435	-0.0840511
5.62788		0.0681023	-0.0385124	0.00232043	0.0196325	-0.00304822	0.0114337	0.0170577	-0.00275559	0.0114389	0.164742	-0.00131188	0.0325743	0.00608611	-0.00128837	-0.0279767	0.122807	0.135809	0.0411566	0.0232014	0.0224059	-0.0681923	-0.0225784	-0.0213556	-0.0578659	-0.018558	0.0106316	-0.0203004	-0.00756927	-0.0249485	0.0162609	-0.00760582	0.0710711	0.0138045	0.0281002	0.125962	0.080828	0.124381	0.065693	0.0215378	0.00202057	0.000972977	-0.0121083	-0.0535221	-0.00861289	0.0160274	0.00550367	0.0162963	-0.0899812
5.71204		0.0451696	-0.0107498	-0.00982662	0.0336443	0.0104334	-0.0920448	-0.0562957	-0.0113242	0.0394216	0.104578	0.0106575	0.0538551	0.0108228	0.0401887	0.047886	0.0715769	0.0765314	-0.0282423	0.0704231	0.0438328	-0.0822395	-0.00581182	-0.0355963	-0.0711625	-0.0376743	0.0102939	-0.0194766	-0.0111553	0.0125446	0.0210453	0.000290301	0.0434356	0.0447542	0.020294	0.0745806	0.0946701	0.0714383	0.112336	-0.0120237	-0.0418701	-0.0657369	0.0369109	0.057121	-0.0103879	0.0352488	0.0554578	-0.079591	-0.122132
5.79617		0.0892704	0.0191313	0.0456038	0.073115	-0.0369474	-0.0516691	-0.068066	-0.0417719	0.083677	0.262222	0.0402972	0.04311	0.0474697	0.00592483	0.0305887	0.0615428	0.0869227	0.0582542	0.0738592	-0.00694353	-0.0836243	0.00628849	-0.0496009	-0.0642306	-0.046886	-0.00281727	-0.00826382	-0.061834	0.032478	0.0496428	0.023468	0.0109004	0.00398969	-0.0709146	0.107351	0.0255528	0.0785403	0.108541	0.0366342	-0.021176	-0.10858	-0.0341218	0.0260543	-0.0449738	-0.00354724	0.023722	-0.075783	-0.135092
5.88033		0.036179	-0.0029156	0.034225	0.0630734	-0.0333523	-0.0448151	-0.0367133	-0.0135687	0.167466	0.215009	0.0114574	0.0393226	0.0238184	0.00298971	0.00200047	0.0174265	0.06663	0.0924186	0.0595904	0.0916332	-0.0627813	0.0214602	-0.00764688	0.00485164	-0.0164686	0.0118527	0.00477592	0.0164596	-0.0123732	0.00678451	0.0520434	0.0741423	0.018516	-0.0882886	0.116194	-0.00353413	0.111793	0.10323	-0.00666675	0.00497868	0.0497997	0.0727808	-0.0444605	-0.0599929	0.0236706	0.0464597	0.00221162	-0.0893817
5.96445		0.0120125	-0.0125123	0.0278194	-0.00301895	-0.0742133	-0.0242702	0.0262605	0.0641606	0.210339	0.268502	0.00558385	0.0429045	-0.0329329	0.0278355	0.037561	0.0046587	0.060015	0.1422	0.0495698	0.0276171	-0.0121594	0.0249434	-0.0475388	0.0523808	-0.017502	-0.0357716	-0.032697	0.0011179	-0.0247581	0.0453667	-0.00574951	0.0400565	0.0966443	-0.0380408	0.094967	-0.0498994	0.086526	0.15703	0.0780653	-0.0129545	0.526658	0.243992	0.0551815	-0.0674523	-0.0363663	0.121621	0.00250635	-0.0969931
6.04861	odor on	0.0919961	0.0465382	-0.0111168	0.0456366	0.00828468	-0.0170135	-0.025572	0.049422	0.272417	0.23082	0.0245246	0.0189925	-0.0235895	0.0322463	0.0529665	0.0170739	0.0783281	0.0856219	-0.00353638	0.0847494	-0.0942376	0.0010539	-0.0450905	0.0097194	-0.00712046	-0.00107247	-0.0791491	0.00723776	-0.0634123	0.0154729	0.15987	0.084707	0.27484	-0.033276	0.119431	-0.0127433	0.181494	0.38574	0.31903	-0.103948	0.765586	0.551142	0.0702847	0.0255089	-0.0133389	0.464196	0.284235	-0.120135
6.13273	odor on	0.0807127	0.109886	-0.0126926	0.188581	0.0227854	0.0409011	-0.00672596	0.107504	0.253621	0.170642	0.0675333	0.0348982	0.019399	0.132881	0.0926907	0.000161701	0.250257	0.260966	0.00924052	0.146408	-0.0378856	0.106015	-0.0163245	0.0935259	0.123987	0.159005	-0.0611076	-0.00319098	0.0254746	0.0935471	0.256761	0.0852072	0.384469	-0.0139639	0.0784678	0.154036	0.388834	0.713726	0.466988	0.0702061	1.03498	0.926672	0.206398	1.08902	0.583904	1.24004	1.04601	-0.0449914
6.21689	odor on	0.201889	0.220253	0.0218019	0.273454	0.036596	0.100222	0.0413165	0.258051	0.226484	0.272935	0.0937843	0.0648873	0.0997885	0.234097	0.13995	0.0947549	0.343872	0.364699	-0.00298275	0.277095	-0.000166102	0.222035	0.0944644	0.141956	0.259169	0.344021	-0.000716598	0.16257	0.106912	0.299405	0.350254	0.1278	0.58814	0.168055	0.33021	0.426297	0.739921	1.01494	0.738739	0.847076	1.59265	1.583	0.812704	1.75646	1.37404	1.72778	2.10222	0.874153
6.30102	odor on	0.206033	0.236293	0.0669291	0.253407	0.0565936	0.156524	0.107881	0.281695	0.160709	0.121617	0.21444	0.114832	0.0911375	0.32879	0.209241	0.181211	0.369344	0.351742	0.155307	0.336544	0.0936026	0.343318	0.0929581	0.38845	0.365388	0.51718	0.15223	0.234147	0.237361	0.452057	0.651979	0.416983	0.926916	0.717496	0.517821	0.828807	1.00591	1.26768	1.25754	1.82572	2.10264	2.17242	1.20149	2.08732	1.813	2.02429	2.88756	2.06396
6.38517	odor on	0.2101	0.312716	0.112242	0.331278	0.106919	0.178205	0.178776	0.368728	0.132062	0.166049	0.251138	0.15677	0.149778	0.39769	0.199969	0.187526	0.418091	0.462846	0.152775	0.365331	0.205838	0.405922	0.207779	0.529521	0.505465	0.662409	0.304116	0.309238	0.396794	0.576341	0.846924	0.800302	1.2711	1.13079	0.822701	1.1692	1.2718	1.40687	1.64247	2.26819	2.44274	2.41781	1.54022	2.20235	2.15567	2.05528	3.29076	2.54122
6.4693	odor on	0.27973	0.366543	0.110668	0.341029	0.108402	0.234348	0.28014	0.407401	0.105713	0.0920741	0.236584	0.175803	0.18241	0.395632	0.212039	0.234186	0.416594	0.481323	0.174702	0.399139	0.236162	0.454929	0.283943	0.651215	0.571578	0.802251	0.266584	0.416043	0.499498	0.694155	1.01265	1.17624	1.46641	1.38703	0.952142	1.38729	1.45119	1.38158	1.78631	2.46064	2.47037	2.61638	1.67644	2.29306	2.31542	2.14164	3.46294	2.86712
6.55346		0.370343	0.3572	0.0892449	0.298034	0.236612	0.285575	0.360616	0.429346	0.0609551	-0.0334669	0.332557	0.178277	0.234329	0.44336	0.255578	0.257377	0.398516	0.423674	0.208174	0.503651	0.334364	0.493802	0.294384	0.643033	0.678736	0.731326	0.334676	0.525061	0.628356	0.709518	1.09021	1.44451	1.55381	1.68019	1.13513	1.49659	1.46285	1.2931	1.89815	2.64461	2.43098	2.54643	1.78042	2.21074	2.42932	2.10283	3.49644	2.89782
6.63758		0.280342	0.318496	0.07528	0.143509	0.288284	0.213391	0.338767	0.383394	0.0304292	-0.0316828	0.321741	0.19404	0.232297	0.351192	0.213073	0.196814	0.332155	0.369294	0.280324	0.574031	0.415017	0.422285	0.350025	0.635592	0.685156	0.681302	0.418875	0.534879	0.621484	0.693255	1.11183	1.80056	1.57526	1.67868	1.19355	1.40415	1.35022	1.17177	1.92926	2.69347	2.25508	2.5088	1.75826	2.02998	2.43024	1.8605	3.39102	2.92841
6.72174		0.209791	0.181333	0.053248	0.256181	0.294326	0.188998	0.303567	0.271876	0.0255703	-0.149212	0.326879	0.159237	0.201566	0.235722	0.167885	0.152531	0.187667	0.245191	0.255021	0.568609	0.363449	0.333408	0.285299	0.558514	0.5742	0.56571	0.453388	0.445543	0.545884	0.575601	1.05232	1.80992	1.44104	1.64279	1.20674	1.15979	1.16686	0.957982	1.784	2.42492	1.97667	2.19039	1.72039	1.72813	2.24005	1.61117	3.10356	2.82911
6.8059		0.14653	0.104725	0.0614079	0.142515	0.187381	0.163468	0.288788	0.143116	0.00895119	-0.0208829	0.235931	0.117448	0.152531	0.193112	0.131708	0.156577	0.0936532	0.196314	0.152878	0.402795	0.368462	0.260049	0.266547	0.46978	0.442533	0.445036	0.349667	0.322703	0.475876	0.448429	0.863862	1.69347	1.15967	1.35476	1.13609	0.981237	1.02702	0.74862	1.57048	2.15053	1.59579	1.88839	1.58975	1.43811	2.09776	1.33166	2.76808	2.46286
6.89002		0.13966	0.0249952	-0.0228345	0.146928	0.14457	0.104103	0.230595	0.125539	-0.0013046	-0.0365996	0.15033	0.0899644	0.152822	0.160722	0.103041	0.0701051	0.0297642	0.0928492	0.141259	0.295301	0.212791	0.204883	0.273322	0.31855	0.357174	0.372227	0.309191	0.279895	0.376135	0.356255	0.73153	1.60849	0.929747	1.06822	0.957198	0.836343	0.875954	0.461334	1.40636	1.67415	1.22117	1.42079	1.49073	1.16908	1.80028	1.01834	2.36334	2.11707
6.97418		0.116562	0.0034186	-0.0343011	0.154175	0.165372	0.0824057	0.186932	0.047643	-0.00637009	-0.0162519	0.132281	0.0309649	0.0507533	0.108369	0.11705	0.00580006	0.0213495	0.102218	0.117984	0.247477	0.224227	0.140094	0.123004	0.224625	0.258591	0.28486	0.265656	0.301478	0.35599	0.288334	0.558006	1.39523	0.683192	0.908734	0.848579	0.634128	0.688186	0.334716	1.16171	1.34309	0.903706	1.1475	1.3588	0.881145	1.6145	0.778897	1.94935	1.80723
7.05831		0.0185946	-0.0313121	-0.0319236	0.122134	0.160857	0.065716	0.144254	0.0154442	-0.022827	-0.0429253	0.13324	-0.0107539	0.0238736	0.0310896	0.0897206	0.0250146	0.00133854	0.0588366	0.0900885	0.165434	0.218215	0.0851787	0.135331	0.165009	0.198373	0.19828	0.139565	0.229792	0.270334	0.206243	0.39387	1.12792	0.488782	0.57776	0.661135	0.426626	0.49777	0.220137	0.941377	0.961677	0.659023	0.769004	1.1745	0.645024	1.33268	0.588513	1.72231	1.48926
7.14247		-0.038877	0.0479842	-0.0870245	-0.00072341	0.198188	-0.0216439	0.141575	0.00608073	-0.0478378	0.0612841	0.111148	0.0140424	-0.0187534	0.0346245	0.0808829	-0.0289716	0.0229483	-0.00261882	0.0628759	0.09832	0.102376	0.103243	0.122097	0.0795223	0.211382	0.133187	0.223239	0.2648	0.233954	0.129882	0.279622	0.803135	0.377494	0.360109	0.507788	0.318237	0.422305	0.13745	0.702748	0.63631	0.4083	0.527276	0.966659	0.431641	1.07853	0.383494	1.3545	1.13982
7.22659		0.0551027	0.0350526	-0.0360798	-0.00953227	0.187751	-0.0322968	0.106521	0.0106093	0.00280097	0.0979971	0.0216238	-0.0204415	-0.0458592	0.0804269	0.0273534	-0.0409732	-0.0417867	0.0100031	-0.00898701	0.00905168	0.0803665	0.113798	0.099834	0.00819941	0.152806	0.0359163	0.146905	0.210857	0.124872	0.089787	0.162282	0.59181	0.174823	0.259213	0.474449	0.261206	0.286737	0.0280426	0.544016	0.366302	0.225996	0.327381	0.793761	0.285048	0.871361	0.199398	1.04474	0.879379
7.31075		0.0719905	-0.00178931	-0.0180858	-0.0637215	0.185759	0.0110436	0.111432	-0.0776014	-0.0793848	0.00300365	-0.0332317	-0.0319141	-0.0740115	0.0243108	0.0494104	-0.0209923	-0.0171653	-0.0529927	0.0386639	-0.00689893	0.0694424	0.0712772	0.0801702	-0.0169383	0.114146	0.0456673	0.0792048	0.102183	0.0786756	0.0708072	0.151545	0.383069	0.0835499	0.161617	0.40652	0.139417	0.221325	0.00876999	0.358554	0.172519	0.0840723	0.206568	0.599197	0.116295	0.64091	0.11529	0.700978	0.628571
7.39487		0.0438645	0.0534644	0.0232679	0.0194644	0.154657	0.0261175	0.0713293	-0.106416	-0.0553545	0.107155	0.0339258	-0.0743506	-0.119406	0.0128371	0.0435391	-0.0432671	-0.0307622	-0.0536534	0.0029047	-0.0408243	-0.00345034	0.0971192	0.0657365	0.0233392	0.0770238	0.0434639	0.0958811	0.0630431	0.061245	0.0400548	0.0368524	0.254639	-0.0239819	0.0435771	0.243473	0.0789712	0.116545	-0.031883	0.215384	0.0349119	-0.0268884	0.0397057	0.445966	0.0229963	0.506411	-0.0438893	0.58515	0.467169
7.47903		-0.0385685	-0.0119274	-0.0843581	0.0106511	0.135108	0.0594239	0.0652154	0.0134557	-0.0081974	0.142154	0.0783141	0.00266546	-0.0813685	0.0037466	0.063792	0.0493019	-0.0438777	-0.034763	-0.00712641	0.0171958	-0.013659	0.0714127	0.0591027	-0.0516483	0.00486494	-0.0228947	0.0943841	0.0114704	0.0408568	0.0179218	-0.028724	0.145875	-0.0747466	0.0189381	0.176531	0.0312443	0.0371992	-0.0892897	0.167285	-0.129432	-0.121597	0.025449	0.256212	-0.0617355	0.380876	-0.0980673	0.351571	0.31083
7.56316		-0.0302794	-0.0294609	-0.0651771	0.0015557	0.160757	0.0631389	0.0210277	-0.0758013	-0.0523496	0.230626	0.0153884	-0.02099	-0.0745112	-0.0738704	-0.026548	0.0755613	-0.00678532	-0.0492815	0.010304	-0.0311284	0.0655065	0.0476935	0.122935	-0.0397597	0.0438488	-0.0137199	0.0539149	0.0174203	0.024571	0.0439674	0.00659722	0.0879314	-0.0710888	-0.0450401	0.147778	-0.0218719	0.0157108	-0.118071	0.0259201	-0.194892	-0.150046	-0.0908907	0.129629	-0.145879	0.22986	-0.116895	0.197291	0.203154
7.64732		-0.0187492	0.00270746	-0.049751	-0.00123383	0.116932	0.0382505	0.017829	-0.0286344	-0.040563	0.201753	0.0536861	-0.0148251	-0.0797698	-0.0465911	0.0156798	0.0627611	-0.00635997	-0.143492	-0.0229325	-0.0390243	0.046405	0.0906655	0.105638	-0.0727974	0.0247187	0.0326489	0.0746274	0.00148092	0.00697059	0.0123882	-0.0759975	0.0423967	-0.122102	0.0062923	0.0745057	-0.088648	-0.0220591	-0.0990443	-0.0206424	-0.23753	-0.211137	-0.17355	-0.0246583	-0.18529	0.0986114	-0.184057	0.0973056	0.0819806
7.73144		0.0932033	-0.0180352	-0.045756	-0.0893286	0.129293	0.0190007	0.015986	-0.0429228	-0.0411572	0.183692	0.0074676	-0.035197	-0.0483625	-0.0171661	-0.0185822	-0.0480679	-0.0257111	-0.0372081	0.0181603	0.0038803	0.0632688	0.0585944	0.00438746	-0.0515718	0.0710667	-0.038895	0.0660899	-0.0643335	-6.11136e-05	0.0165738	-0.072548	-0.0402081	-0.1324	-0.0242187	0.0678887	-0.0745775	-0.0524419	-0.0336548	-0.0875726	-0.272427	-0.225457	-0.227205	-0.0930791	-0.243606	0.0251924	-0.203796	0.0806635	-0.0195726
7.8156		0.0444953	0.0218419	-0.0243659	-0.0221776	0.0936413	0.0786812	0.0479468	-0.0908575	-0.0293744	0.105016	-0.0217511	0.0209439	-0.0794208	-0.0289637	-0.00785529	-0.0343932	-0.0259489	-0.00357497	0.0492197	-0.0263908	0.0185265	0.00906065	0.0704305	-0.052842	0.0124412	-0.00291739	0.0432873	-0.00247756	0.0194669	0.0413203	-0.0656207	-0.0166774	-0.149259	-0.10912	0.00396631	-0.0929743	-0.103997	-0.0318397	-0.180286	-0.325105	-0.272205	-0.234354	-0.168648	-0.288989	-0.00572532	-0.261724	-0.0262663	-0.0548577
7.89972		0.0309753	-0.0428659	0.0195803	0.0473845	0.0876371	0.068025	0.0226143	-0.0916848	-0.0366527	0.136769	-0.0665378	-0.0692983	-0.074867	-0.0808563	0.0125639	-0.0738489	0.0201873	-0.0826269	0.0844324	-0.0255696	-0.0717972	0.058492	0.0894696	-0.0346079	0.0417409	0.03305	0.0452484	-0.0112901	-0.0180006	0.0589387	-0.119175	-0.0398963	-0.159559	-0.11182	-0.0187063	-0.137846	-0.102035	-0.101582	-0.180642	-0.317948	-0.12456	-0.252882	-0.189646	-0.256434	-0.0572224	-0.247248	-0.0519292	-0.106066
7.98388		0.0201348	-0.0271637	0.0150882	-0.0434491	0.0513995	0.0987565	-0.0254988	-0.0512326	-0.0417459	0.133005	-0.000894886	-0.0146788	-0.0811837	-0.101335	0.0189836	-0.0325164	0.0294091	-0.0688346	0.0376712	-0.00577625	-0.0370865	0.0591514	0.113493	-0.0212815	0.074591	0.0180367	-0.000922011	-0.0634412	0.0471618	0.058784	-0.168489	-0.082624	-0.146653	-0.105659	-0.046062	-0.0178053	-0.100179	-0.147044	-0.187569	-0.348415	-0.318199	-0.295629	-0.210175	-0.298866	-0.134522	-0.264686	-0.0297621	-0.144669
8.06804		0.0196205	0.0316944	0.00786674	0.0149724	0.100878	0.137283	0.0427811	-0.0328346	-0.000846134	0.193904	-0.00246223	-0.0441234	-0.00993999	-0.017459	0.0795347	-0.0613628	0.0250287	-0.113538	-0.00202158	0.0175988	-0.0558176	0.0744021	0.0164627	-0.0431517	0.0288912	0.0416257	0.0280143	-0.0623672	-0.00944101	0.0511315	-0.0917873	-0.066839	-0.114555	-0.135972	-0.103479	-0.132971	-0.0797235	-0.0561063	-0.220392	-0.389924	-0.378	-0.303336	-0.232225	-0.309312	-0.191242	-0.250991	-0.0999998	-0.171918
8.15216		0.0207018	-0.0181009	-0.0669278	-0.00929084	0.0939348	0.0648469	-0.0203101	-0.00727799	0.0343033	0.126646	-0.0430006	0.0332178	-0.0125764	-0.0249841	-0.00104828	-0.0470703	0.0547712	0.00250349	0.0532547	0.0752043	0.00130675	0.0590437	-0.0449902	-0.0664011	-0.0502721	0.0220663	0.00590686	-0.0590059	0.0411403	0.0445689	-0.093728	-0.0276788	-0.0682375	-0.0975218	-0.0010156	-0.0862104	-0.0850695	-0.027772	-0.255898	-0.339554	-0.325278	-0.24458	-0.273445	-0.322005	-0.13351	-0.27962	-0.168364	-0.177959
8.23632		0.00291875	0.0172426	-0.0131596	-0.010042	0.0729114	0.0263027	-0.00138327	0.00093288	0.0560155	0.0384046	0.0138886	-0.0790473	-0.0574338	-0.0156096	0.0575843	-0.0770458	0.0182646	0.0299872	-0.0207076	0.114911	-0.0154354	0.0392026	-0.0127442	-0.0579159	-0.00726675	0.0091864	0.0807028	0.0318193	0.04534	0.0476173	-0.0795833	-0.0387945	-0.0236886	-0.0769011	-0.12791	-0.0365618	-0.0934314	-0.106008	-0.261368	-0.345642	-0.351459	-0.22762	-0.277757	-0.283011	-0.222498	-0.260849	-0.117341	-0.189637
8.32045		0.0235594	0.0371784	-0.00954265	0.000917993	0.058447	0.0786341	0.063357	0.0373657	0.0823557	0.0615653	-0.00473784	-0.0542383	-0.0872947	-0.0467691	0.0156365	-0.0207124	0.0157646	-0.0468551	0.0376252	0.0707133	0.04976	0.00167117	0.0200447	-0.0291697	-0.0348075	-0.0602991	0.129703	-0.0233734	0.0203117	-0.012563	-0.00783013	-0.0523378	-0.0591732	-0.188298	-0.091353	-0.0273521	-0.117479	-0.0749957	-0.247853	-0.343365	-0.345702	-0.283734	-0.285199	-0.322666	-0.269045	-0.233591	-0.135379	-0.178531
8.40461		-0.00688571	0.00388223	-0.00427374	-0.0811196	0.154721	0.0252246	0.0136505	0.0147248	0.0771383	0.0639994	-0.0502576	-0.0255392	-0.0605081	-0.0618432	0.0364764	-0.0507759	0.0976015	-0.0342347	0.011497	0.0747626	0.0519518	-0.00860414	-0.0286694	-0.060718	-0.0116253	-0.0373204	0.0831263	-0.0154608	0.042062	0.0517766	-0.0735111	-0.105426	-0.0831775	-0.0521045	-0.0363207	-0.0366934	-0.0910896	-0.0277726	-0.272417	-0.326243	-0.364642	-0.307972	-0.349249	-0.286198	-0.304854	-0.226251	-0.1586	-0.146153
8.48873		-0.0770898	-0.0358879	-0.0866468	-0.0229272	0.151098	-0.0694281	0.0122515	0.0423519	0.0564932	0.0678629	0.0208491	-0.0189049	-0.0364738	0.00536169	-0.0110857	0.00085183	0.01738	-0.0538319	0.033612	0.0555038	-0.0786161	0.0376809	-0.0433948	-0.0447982	-0.0532905	-0.00401289	0.0929895	-0.0523715	0.0766228	0.0494263	-0.163196	-0.111928	-0.0846106	-0.163051	-0.0386236	-0.0366322	-0.0978525	-0.0888489	-0.278088	-0.343223	-0.367492	-0.231055	-0.319746	-0.279669	-0.25062	-0.226454	-0.136681	-0.181391
8.57289		-0.00416231	-0.0235532	-0.040098	0.00376214	0.171633	0.0134073	0.0321632	-0.0168013	0.0697525	0.0865492	0.00435438	-0.0468632	-0.0390905	-0.0038628	0.0125215	0.00678582	-0.0227946	-0.0396498	-0.00734227	0.0367289	-0.0700526	0.0371042	-0.032567	-0.0440578	-0.0101788	-0.0425441	0.148171	0.00239524	0.0647838	-0.00450968	-0.0804441	-0.128702	-0.126678	-0.120241	0.00346372	-0.0110474	-0.116811	-0.0702496	-0.275723	-0.303382	-0.333352	-0.26197	-0.307612	-0.318816	-0.258933	-0.237131	-0.170487	-0.169134
8.65701		-0.0252208	0.0191876	-0.00528599	-0.0134906	0.11105	-0.0480774	0.0234469	-0.0155911	0.0745564	0.0405268	0.0912889	-0.0190797	-0.001901	-0.0204302	0.0214914	-0.0143972	0.0323636	0.0227765	0.0100705	0.09688	-0.0670313	0.0530416	-0.0322399	-0.042893	-0.00648134	0.00653764	0.163607	-0.00967077	0.0358218	0.034382	-0.0660486	-0.0610922	-0.136792	-0.114838	-0.00932493	-0.00217815	-0.09951	-0.0878313	-0.277521	-0.321433	-0.27862	-0.225028	-0.303036	-0.280466	-0.282306	-0.260134	-0.192397	-0.22872
8.74117		-0.036958	0.00994233	-0.0590894	-0.0598433	0.101276	-0.059674	0.0591733	-0.0410601	0.0454351	0.0205424	0.0457015	-0.00120118	0.0228601	-0.0339258	0.0420298	0.0336226	0.0159284	0.0724273	-0.0137855	0.168924	-0.0224337	0.0743875	-0.077849	-0.04716	0.00232799	-0.00997189	0.153324	-0.00103775	0.0395343	0.0153338	-0.0744264	-0.00804216	-0.113615	0.0275274	-0.111222	-0.109387	-0.103057	-0.120033	-0.240524	-0.264356	-0.285381	-0.223406	-0.32645	-0.30949	-0.27351	-0.266226	-0.186746	-0.222134
8.8253		-0.0743422	0.125363	0.00348561	-0.0385895	0.163775	-0.033229	0.00988918	-0.0485058	-0.00439947	0.0310238	-0.0419957	-0.00290315	0.0328384	0.00430094	0.00161251	0.0220098	0.0064304	-0.00240291	-0.000803532	0.161498	-0.0754643	-0.00441941	-0.00660663	-0.071578	0.0136614	0.0160451	0.0928431	0.0333685	0.0150577	0.0218512	-0.0269868	0.0377136	-0.127782	-0.0776222	-0.00696879	-0.011994	-0.0919321	-0.112485	-0.244993	-0.25789	-0.269908	-0.238778	-0.347956	-0.277719	-0.291341	-0.270952	-0.178434	-0.224406
8.90946		-0.103378	0.0968075	-0.0128185	-0.00017774	0.156767	-0.00698206	0.066652	0.0182188	-0.0346445	0.000341805	-0.00654071	0.0113793	0.0244204	0.0208352	0.0456674	0.032442	0.00985953	-0.00732254	0.0200157	0.140549	-0.062378	0.024627	0.0310251	-0.00568437	0.0059271	-0.0365851	0.12721	0.0520932	-0.0136243	0.0265469	-0.0681729	-0.00983944	-0.0747853	-0.121226	0.015122	-0.0914735	-0.0371773	-0.0847686	-0.211079	-0.272243	-0.236922	-0.220909	-0.332859	-0.23528	-0.288626	-0.240556	-0.196155	-0.210186
8.99358		-0.00928877	0.111226	-0.0594178	0.0822772	0.126132	0.023521	0.0677004	0.0978686	-0.0262784	0.0459547	0.0186216	0.0520465	-0.0131242	0.020016	-0.0218248	0.0580059	-0.0334431	0.0373855	-0.0458794	0.100377	-0.0152614	0.0025949	0.0212194	-0.0516242	-0.00458514	0.00343075	0.0914821	0.0551614	0.00736084	0.0540297	-0.0911048	0.0016188	-0.0676962	-0.117764	-0.0217552	-0.147004	-0.025065	-0.143623	-0.196575	-0.254552	-0.264071	-0.213695	-0.386148	-0.200136	-0.271406	-0.226168	-0.231318	-0.231244
9.07774		-0.0231216	0.0253067	-0.0207156	-0.000597284	0.0838221	0.035764	0.0537278	0.0515315	-0.0121833	0.0766546	0.0136783	0.0282318	-0.0637301	-0.000746673	0.0527382	0.090844	-0.0322074	0.0982892	-0.0957709	0.118851	0.0304371	0.0524777	-0.0549601	-0.0622141	0.0447872	0.00020766	0.0845024	0.0184192	-0.0218227	0.0346809	-0.102347	0.0535621	-0.0949659	-0.0413822	0.0230605	-0.0915143	-0.0625172	-0.152573	-0.192891	-0.267681	-0.28265	-0.180416	0.0493765	-0.195604	-0.302598	-0.218044	-0.216315	-0.260671
9.1619		0.00797219	0.0220062	-0.0541392	0.0836524	0.0468405	0.0590011	0.0205143	0.0439563	-0.01739	0.0451078	0.0602817	0.0857591	0.0115489	0.00414749	-0.000741325	0.111552	-0.0590787	0.129832	-0.0243437	0.0184409	0.0591598	0.0643908	-0.0519933	-0.0400122	0.057096	0.061538	0.0761467	0.00794444	-0.00291259	0.0470334	-0.103084	0.00329853	-0.103076	-0.00823333	-0.0210309	-0.111817	-0.0207169	-0.191026	-0.230576	-0.2411	-0.230346	-0.202647	-0.113452	-0.176526	-0.273041	-0.231323	-0.206753	-0.261828
9.24602		-0.0345281	0.0820262	-0.00673086	0.0297208	0.0447929	0.0410733	0.0449572	0.0065498	0.0438831	0.0765557	0.064154	0.145947	-0.0155346	0.0135867	0.0193506	0.0617008	-0.042779	0.00864641	-0.05555	-0.00150098	0.0370802	0.0662563	-0.0368267	-0.0391212	0.0189985	-0.0125384	0.0431585	-0.0470899	-0.0136712	0.0669085	-0.0912626	-0.0121391	-0.0191354	0.0220429	-0.00980007	-0.126583	-0.0223701	-0.16621	-0.21458	-0.25969	-0.209471	-0.241091	-0.24081	-0.0977229	-0.282542	-0.166364	-0.245165	-0.290257
9.33018		-0.0119365	-0.00768756	0.0608622	0.055352	0.0393194	-0.0209486	0.0323259	-0.0396687	0.0459984	-0.0330654	0.115067	0.114075	-0.0563179	-0.0128444	0.0406139	0.0609699	0.00993875	0.0484668	-0.0232516	-0.0025032	0.0131919	0.114255	-0.0129506	-0.00187927	0.0163647	-0.068033	0.133547	-0.0255363	0.0227977	0.0360809	-0.101667	0.0349108	0.0456845	-0.0945926	-0.0371468	-0.0947682	-0.0427222	-0.136928	-0.219716	-0.21962	-0.221917	-0.231026	-0.242056	-0.163446	-0.279274	-0.178627	-0.21724	-0.293546
9.41431		-0.0418285	0.0602316	-0.000318093	0.0777263	0.0581028	-0.0571103	0.102529	0.000914502	0.0436228	0.0114828	0.0531006	0.161555	-0.022057	-0.0801125	0.0238569	0.0626195	0.0339773	0.0981945	-0.0747189	0.0347291	0.0411884	0.0953874	0.0569921	0.0238456	0.00711096	-0.0779477	0.116219	-0.00973873	0.000686809	0.0600538	-0.0706674	0.0344878	-0.0880624	-0.0722972	-0.0443965	-0.0829051	0.000909961	-0.148112	-0.206885	-0.22162	-0.200469	-0.206553	-0.0936447	-0.227926	-0.256535	-0.195714	-0.225105	-0.288516
9.49846		-0.0307825	0.059633	-0.03644	0.0859429	0.0484851	-0.0873792	0.0505602	0.0411519	0.0300739	0.0338833	0.0594549	0.110681	0.0346053	-0.0930353	0.0166295	0.0468004	-0.00846766	0.0854306	-0.0380214	0.0127974	0.0448006	0.0267156	-0.0618346	0.0123717	-0.0290951	0.0519462	0.120773	-0.0121969	0.0100849	0.0215489	-0.0188306	0.108994	-0.065865	-0.0460429	0.0229228	-0.0977005	-0.0109988	-0.0852906	-0.169436	-0.174832	-0.209402	-0.0998399	-0.39091	-0.18462	-0.276019	-0.204466	-0.164822	-0.292879
9.58259		-0.0286498	-0.027928	-0.0327193	0.059597	0.0530821	-0.003245	0.0319555	0.088386	0.0515679	-0.0151856	0.129224	0.111355	0.0324048	-0.0690635	0.0273798	0.0517902	0.0599832	0.0850758	-0.000159828	0.0546623	0.0392548	0.0530451	-0.0478887	0.028111	0.000155049	0.0666666	0.139089	0.0355773	-0.0196139	-0.0192314	-0.0088371	0.123102	-0.0437086	0.0354241	0.0283864	-0.0907867	-0.0560266	-0.0110876	-0.173625	-0.110532	-0.166587	-0.196591	-0.223325	-0.211227	-0.255661	-0.202904	-0.179888	-0.247699
9.66675		-0.0164836	-0.0436429	-0.0270787	0.0607894	0.0978375	0.008927	0.00324017	0.0461892	0.0456525	-0.0699817	0.0853606	0.150053	0.0510651	-0.0829116	0.0234542	0.0727844	0.0599496	0.103081	-0.0179489	-0.022611	0.05259	0.0172845	-0.028182	0.00167713	0.00050858	0.0064273	0.119959	-0.0232759	0.0132459	0.0284731	-0.0832157	0.075348	-0.0815347	-0.0393259	-0.0265259	-0.0902944	0.00769429	0.0325904	-0.16248	-0.206689	-0.179365	-0.147671	-0.380224	-0.194473	-0.269058	-0.218284	-0.228448	-0.224323
9.75087		-0.0131604	-0.0130289	0.00396915	0.122841	0.0195449	0.0246726	-0.0163642	0.0477507	0.0603038	-0.0665673	0.105399	0.112138	0.037497	-0.0491582	0.0279936	0.0530203	0.0232984	0.0784733	-0.0254307	0.0235441	-0.0342994	-0.0176688	-0.0358441	-0.0216631	-0.0189535	0.0574384	0.0515508	0.0372767	0.0346038	0.0394329	-0.0506742	0.0938739	-0.0640962	0.0097532	-0.00163165	-0.0239265	0.00726661	0.0101403	-0.191265	-0.209641	-0.195778	-0.0608374	-0.111978	-0.125387	-0.273154	-0.197564	-0.19421	-0.218835
9.83503		-0.000368287	-0.000529048	-0.0157435	0.070708	0.046787	0.00831843	0.0320784	0.0724954	0.075569	0.0469435	0.126362	0.0454108	-0.0243529	-0.0181913	0.0115191	0.0940361	0.0348909	0.0293707	-0.0767941	0.0097975	0.0334076	0.0400598	-0.064883	-0.0264346	-0.0262874	0.00539298	0.0364031	0.033694	0.00585981	0.0268511	-0.0627281	0.0493542	-0.095683	0.0552908	-0.0750257	-0.0461832	0.00670732	0.0411499	-0.219175	-0.178973	-0.188817	-0.13834	-0.230417	-0.120455	-0.200769	-0.15682	-0.23836	-0.224029
9.91915		0.0120377	-0.00556644	-0.0207367	0.114452	0.071065	0.00271818	0.0460969	0.045304	0.111227	0.0434861	0.0895078	0.0428729	0.00132255	-0.00614796	0.0406289	0.0710137	-0.0416967	0.0269128	-0.0583179	0.0745325	-0.0384762	0.0270642	-0.0365761	0.00181042	-0.00287574	0.0136027	-0.000108542	0.0521271	-0.0474551	-0.00921029	-0.0744527	0.00849231	-0.0846479	-0.0318743	0.0234383	-0.0318394	-0.0249463	0.0281217	-0.209332	-0.237785	-0.204749	-0.108372	-0.211582	-0.110813	-0.240713	-0.215917	-0.213205	-0.237352
10.0033		-0.0114211	0.0567334	-0.0593104	0.0305297	-0.00712252	0.0587872	0.0700908	0.036097	0.142203	0.0444428	0.0356335	0.0605499	-0.0266275	0.0225081	0.0475657	0.0753033	-0.0140079	-0.00404029	-0.0568805	0.0635138	-0.0442215	0.0374784	-0.00175071	0.0760255	0.0437108	0.0595932	0.0119216	0.024068	-0.0247149	0.0354893	-0.0433646	0.0400018	-0.0907238	-0.0255429	-0.0738678	-0.0373423	-0.0400377	-0.0297307	-0.167065	-0.174903	-0.203877	-0.105914	-0.305947	-0.160506	-0.191008	-0.225384	-0.229915	-0.217577
10.0874		-0.0101629	0.036955	-0.048652	0.0603365	0.0103291	0.0478499	0.105589	0.0120561	0.202798	0.0184995	0.115616	0.0723343	0.00460372	0.043127	0.0311206	0.0421478	0.0193089	-0.00502413	0.0162948	0.0394776	0.0161035	0.0527397	-0.025448	0.0519205	0.0552229	0.00560109	0.0592469	-0.0149282	-0.0528314	0.000260745	-0.0289509	0.00889542	-0.0790057	-0.00856062	-0.0597726	-0.116517	-0.0366125	0.0162293	-0.167691	-0.148973	-0.18537	-0.144652	-0.193794	-0.211709	-0.234322	-0.254818	-0.231489	-0.211533
10.1716		0.0286559	0.0294094	-0.00776896	0.035179	-0.0207808	0.00410997	0.10065	0.0397591	0.176306	0.0413793	0.117821	0.159682	0.00579513	0.0600837	0.0334702	0.0188617	0.040323	-0.00316596	-0.029155	-0.0106486	0.0352661	0.0465729	-0.0202927	-0.023817	-0.0182755	0.0325412	0.0145384	-0.0130339	0.00659423	0.027161	-0.0803772	-0.0115663	-0.0496223	-0.0208694	-0.0739124	-0.0738861	-0.00679868	-0.060529	-0.171495	-0.13747	-0.175798	-0.106893	-0.254034	-0.25024	-0.185174	-0.222447	-0.226331	-0.207377
10.2558		-0.0149105	0.0425225	0.0032082	-0.0352452	0.0166027	-0.000639098	0.0668643	0.0561876	0.181313	-0.0596161	0.130788	0.165476	0.0685219	0.045398	-0.00804073	0.0416713	-0.0803747	-0.0154606	0.00956541	0.0108777	0.0637602	0.0165157	0.002921	0.0539632	-0.0108129	0.0238506	0.015698	0.0137982	-0.0152194	-0.00554119	-0.0831016	0.0291351	-0.0254648	-0.0390228	-0.0857154	0.00618228	-0.0124564	-0.0553615	-0.154659	-0.132162	-0.255075	-0.0503203	-0.228884	-0.20597	-0.19095	-0.246498	-0.232054	-0.210268
10.3399		0.0147938	0.0397729	-0.0305983	0.106503	-0.0483433	-0.0168831	0.0622622	0.0196422	0.14111	-0.0407128	0.162049	0.0434173	0.0646565	-0.00372481	0.0165833	0.000336641	-0.00468608	-0.016807	0.0350844	0.0016924	0.027638	0.0616284	-0.0279496	0.0295857	0.0405949	-0.0134046	0.0358888	-0.0131798	-0.00288849	-0.00433135	-0.0984571	-0.0202979	-0.0168945	-0.0442175	-0.0779497	-0.0310324	-0.0195185	-0.0188002	-0.163149	-0.0729639	-0.248265	-0.147531	-0.10737	-0.139352	-0.238916	-0.225959	-0.242212	-0.218174
10.424		-0.00146487	0.0842735	-0.0244415	-0.0111012	0.0211717	-0.0374194	0.0276426	0.0404564	0.0941263	-0.0174299	0.122551	0.150647	0.0781558	0.0178104	0.0387814	0.0483267	0.0491618	-0.0473904	0.0484909	0.0184611	0.0384693	0.0523985	0.00879261	-2.18639e-05	0.00377067	0.141979	-0.0230259	-0.0375551	-0.0491108	-0.0217978	-0.0771697	-4.57651e-05	-0.00425659	-0.0428374	-0.0641364	-0.00448916	-0.0191747	0.011733	-0.19599	-0.095626	-0.233877	-0.0750072	-0.107051	-0.160731	-0.230893	-0.213124	-0.263904	-0.243733
10.5082		0.0212371	0.0884847	0.105449	0.0574236	-0.00327659	-0.0319933	0.0517652	0.0119027	0.123454	0.0162725	0.143327	0.161727	0.0276115	0.00147375	0.0351548	0.0407298	0.0461511	0.0620125	0.0474593	0.0345999	0.0185294	0.0251659	-0.0456512	-0.0130542	0.0620335	0.0145733	-0.0096214	-0.000769587	0.00517594	0.00197733	-0.0116667	0.107858	-0.0257239	-0.0311611	0.0566468	-0.0127136	-0.0319913	-0.0569827	-0.156444	-0.0814062	-0.207791	-0.0847785	-0.158594	-0.150713	-0.22262	-0.200386	-0.254043	-0.229953
10.5923		0.0155125	0.064456	0.12516	-0.0543859	-0.0676769	0.039045	0.0538504	-0.000811427	0.10481	0.0551746	0.13243	0.130405	0.0248176	-0.0057039	0.0330768	-0.0382333	0.0488678	0.00218922	0.0626519	0.0747049	-0.0333507	0.0513094	-0.0182596	0.00367832	0.0890041	0.0382325	0.00148564	0.0577447	-0.000977948	0.0162424	0.0286034	0.115334	-0.0414341	-0.078735	0.0589283	0.00975455	-0.0175903	-0.063466	-0.174539	-0.0809371	-0.180098	-0.114446	-0.248371	-0.12659	-0.183863	-0.187669	-0.255443	-0.224259
10.6764		0.0474756	0.160561	0.163703	-0.0305722	0.00710881	0.0702433	0.0734002	0.018941	0.0874804	0.103621	0.208539	0.177482	-0.0300436	-0.0126113	0.0271656	0.00233326	0.0155636	0.00833255	0.0516645	0.056865	-0.00901211	0.0464244	0.0212862	-0.0616537	0.0678065	0.0429734	0.0034541	0.127225	0.0142557	0.0307277	-0.0658247	0.066083	-0.0334272	0.0262788	-0.0529463	-0.0143408	-0.0233617	-0.0643019	-0.115031	-0.0903245	-0.155229	-0.112323	-0.220424	-0.138137	-0.170969	-0.213856	-0.276971	-0.185222
10.7606		0.0117787	0.136867	0.1374	-0.00479124	0.00871094	0.0439234	0.113063	0.0335018	0.107083	0.182859	0.157835	0.123615	-0.0282824	0.0126408	0.0114788	-0.0224301	-0.0144965	-0.0532377	0.030821	0.0872696	0.0183134	0.0351167	-0.0246004	-0.0157713	0.104878	0.0176851	0.0309425	0.108903	-0.0694648	0.0280279	-0.0878984	0.0727935	0.000411592	0.0797684	0.0126004	0.011664	0.0233997	-0.0507086	-0.146305	-0.0764752	-0.142716	-0.0842109	-0.247154	-0.0727277	-0.144698	-0.15681	-0.217378	-0.204857
10.8447		-0.0585011	0.182094	0.150432	-0.00335981	0.0299006	0.0390438	0.0732892	-0.0168046	0.173404	0.243009	0.123403	0.184282	-0.0191822	0.0218444	0.0217446	-0.0175266	-0.0261452	-0.019933	0.00567617	0.115054	0.065995	0.0296168	0.0513137	0.0189491	0.0153869	0.0251364	0.0705058	0.122046	-0.0106439	0.0228545	-0.0776395	0.094092	-0.0140221	0.0175943	0.0321485	0.0280283	-0.0195936	-0.0761231	-0.105184	-0.10988	-0.11365	-0.0696776	-0.238373	-0.137379	-0.126467	-0.149911	-0.243405	-0.166391
10.9289		0.00358143	0.205287	0.121365	-0.0481781	0.00606887	-0.029998	0.087872	-0.0233415	0.154641	0.0938165	0.134718	0.27723	0.00540152	0.0103691	0.0235902	0.0300897	-0.0575209	0.0336266	0.0236347	0.127192	0.00726107	0.0218815	0.033561	0.00621544	0.0915975	0.0108241	0.082448	0.167457	-0.0548679	0.0523109	-0.0779828	0.10475	-0.0249601	-0.00493943	-0.00312229	-0.0215796	0.0262005	-0.0937693	-0.0961592	-0.137058	-0.0706106	-0.0579831	-0.249749	-0.118828	-0.0553436	-0.131279	-0.274169	-0.162276
11.013		0.0284267	0.130555	0.0521902	-0.0461667	-0.0108483	0.00696013	0.110421	0.0319559	0.0925825	0.164996	0.138979	0.213671	0.0225439	0.0337802	0.00566373	0.00484268	-0.0054265	-0.00236661	-0.00157666	0.121906	0.0367449	0.045091	0.051115	0.0142755	0.0482087	0.0677363	0.0854672	0.188848	-0.024205	0.00792585	-0.073299	0.0445464	-0.0496845	0.0911406	-0.0518569	0.0274263	0.0180596	-0.0574368	-0.108213	-0.0808929	-0.0720833	-0.0911106	-0.222791	-0.171873	-0.0717715	-0.126178	-0.249553	-0.0906805
11.0972		0.011196	0.165874	-0.0367984	0.00552845	0.0306604	0.0370568	0.0936369	-0.0059384	0.0768588	0.219033	0.115267	0.150048	0.0540714	0.0106836	-0.00534133	0.0224276	0.0245574	0.0812811	0.0118284	0.055816	0.0208648	0.0164169	-0.020827	-0.0231726	0.141454	-0.00738124	0.0384673	0.143576	-0.00869585	0.0206332	-0.0856824	0.0577681	-0.0456778	0.0543119	-0.0455152	0.0123718	0.000616912	-0.0521438	-0.120569	-0.0732561	-0.0531964	-0.177204	-0.245306	-0.174249	-0.0712081	-0.149467	-0.220723	-0.0968293
11.1813		0.0441006	0.178192	-0.0553858	0.0607851	0.00193658	-0.0621585	0.0676094	-0.0169055	0.108471	0.0050898	0.0510798	0.117384	0.0704688	0.0804495	0.0110726	0.0481468	0.069495	0.00709934	-0.00198208	0.0223839	-0.0438475	0.0201539	-0.00118716	0.0290447	0.117714	-0.075711	0.153501	0.153704	0.0572019	-0.017859	-0.0706943	0.0282218	-0.0553114	-0.0687209	-0.0589554	0.0181775	-0.0230768	-0.0437167	-0.202324	-0.131729	-0.0755469	-0.107735	-0.19856	-0.156042	-0.11244	-0.0784023	-0.242855	-0.109596
11.2655		0.10385	0.133014	-0.0469901	0.00927464	-0.0447615	-0.0449401	0.0599664	-0.0401469	0.0953871	0.0498576	0.05261	0.0824559	0.00905612	0.105331	0.0178809	0.0425344	0.111849	0.0971438	-0.0375778	0.0357475	-0.0548402	0.111334	0.014417	0.0278689	0.046406	0.0706769	0.129847	0.154871	0.0361332	0.00072013	-0.061605	0.0695886	0.0740563	0.0125681	-0.0670608	-0.0129861	0.0242518	-0.0116282	-0.167181	-0.0686236	-0.0931759	-0.0763248	-0.191876	-0.167249	-0.0915183	-0.080435	-0.227845	-0.101661
11.3496		0.0211109	0.0889053	-0.031678	0.0550091	0.0283694	0.0728513	-0.0029021	-0.0166622	0.0894809	-0.0194005	-0.00705457	0.0471548	0.0867208	0.0989964	0.0667412	0.100351	0.168063	0.029127	-0.0528996	0.0257543	-0.00437821	0.0213114	0.0162246	0.00843646	0.0905379	-0.0214615	0.0910616	0.169254	0.000129709	0.0286885	0.0201274	0.0222864	-0.020598	0.0204579	-0.0018294	0.0359231	-0.00917092	-0.000317735	-0.134639	-0.108772	-0.126584	-0.117589	-0.167965	-0.147034	-0.156938	-0.0911979	-0.237319	-0.152149
11.4337		0.00936546	0.0847509	-0.055497	0.00933828	0.0564004	0.0553146	0.0254462	-0.0293717	0.0534274	-0.102458	-0.0210764	0.0583723	0.0399907	0.0638563	0.0750129	0.0876512	0.155996	-0.0248954	-0.0304195	0.0158538	-0.0184195	0.0268797	0.0205837	-0.00732391	0.0706587	-0.0174684	0.11623	0.168445	0.00806725	0.0639373	-0.0233993	0.0809123	0.00452253	-0.0176664	-0.0291163	0.0115778	0.00310702	-0.025777	-0.161802	-0.124319	-0.0973379	-0.00544318	-0.186147	-0.165315	-0.122129	-0.0643195	-0.196335	-0.187584
11.5179		-0.0211916	0.0737092	-0.0584289	-0.0208357	0.0383189	0.0804477	0.0315789	0.0293164	-0.0284924	0.105993	0.0567507	-0.00680744	0.0356423	0.0301582	0.0578931	0.0912458	0.134335	-0.033883	-0.022914	0.0445326	-0.0979572	0.0509952	0.0770039	0.0059451	0.0477187	0.0855078	0.0985518	0.104568	-0.00448663	0.0558106	-0.0163761	0.0345755	-0.0175192	0.0705718	0.0120928	-0.0179071	0.0150437	0.0174542	-0.161727	-0.126036	-0.0895477	-0.0431438	-0.157399	-0.154854	-0.0989065	-0.102024	-0.306035	-0.138288
11.602		-0.0168526	0.10816	-0.052434	-0.0231015	-0.00174911	0.0242218	0.0348351	0.0128192	-0.0479347	-0.0395055	-0.0106993	-0.0275229	0.0189682	0.0156033	0.0353022	0.0832235	0.125505	0.0204903	-0.0293161	0.01291	-0.0581003	-0.0165981	-0.00514884	0.0486832	0.0208389	0.0644602	0.0691844	0.151498	-0.00269154	0.0249521	-0.0698895	0.0692863	0.0112999	0.056386	0.045364	0.0275098	-0.00314501	0.0627604	-0.113329	-0.100561	-0.147016	0.0196414	-0.210207	-0.131906	-0.10601	-0.11359	-0.195966	-0.157335
ab4a ORN axons (DL5 glomerulus), dF/F
exposure cond.	E2-hexenal
n		8								6						8								8								8								8								7
stimulus, E2-hexenal (log[conc.])		solvent (0)	solvent (0)	solvent (0)	solvent (0)	solvent (0)	solvent (0)	solvent (0)	solvent (0)	-12	-12	-12	-12	-12	-12	-11	-11	-11	-11	-11	-11	-11	-11	-10	-10	-10	-10	-10	-10	-10	-10	-9	-9	-9	-9	-9	-9	-9	-9	-8	-8	-8	-8	-8	-8	-8	-8	-7	-7
time (s)
0.242756		-0.021164	0.0168815	-0.0231348	-0.037817	-0.00962159	-0.0228155	-0.00279321	0.00363373	-0.039586	2.82851e-06	-0.0980869	-0.0149513	-0.0586016	-0.00285047	-0.0181766	0.0521772	0.0034506	-0.00636677	0.0249852	0.0262017	-0.0100484	0.0108539	-0.0417904	-0.0409543	0.0386528	-0.0191079	0.0010892	-0.0383767	0.102345	0.0117611	0.0467695	0.0142648	0.161248	0.0164202	-0.0808957	0.0677582	0.00997181	-0.0385398	0.00793388	-0.0238999	-0.0178867	0.0238394	0.00791226	-0.0490453	-0.0104953	-0.000775355	-0.0162792	0.0774798
0.326881		-0.0132245	0.0360988	-0.00138549	-0.0305072	-0.0250691	-0.0167745	0.00658945	0.0234533	-0.0638906	-0.0438264	-0.0587325	-0.0430006	-0.0455713	0.00227712	-0.0297302	0.043891	0.00404542	0.0136594	-0.034392	0.0301657	0.0584183	0.0125327	0.0143191	-0.0160186	0.0762769	-0.00627383	-7.26813e-05	-0.0413606	0.0437605	-0.00736431	-0.0238579	-0.0127939	0.128499	0.0493521	-0.0912432	0.0628379	-0.0327703	-0.0203792	-0.0498113	0.0113217	-0.046073	-0.0218589	0.0615066	0.0232905	0.0428782	-0.017072	-0.0565408	0.0532058
0.411039		-0.0286203	-0.0273064	0.0502246	-0.035266	-0.101365	-0.0211707	-0.00671116	0.0498452	-0.0669044	-0.0285908	-0.0302005	0.0145689	-0.064594	-0.0047984	-0.0203429	0.0165999	-0.00152926	-0.0215828	-0.00508886	-0.0160011	-0.04017	0.00332883	-0.0215279	-0.0388422	0.128054	0.0302971	-0.0149073	-0.0315501	0.0611547	0.024638	-0.0336867	-0.0108306	0.120964	-0.0376327	-0.064536	0.0475685	-0.0500274	-0.0463771	-0.000203127	0.0229232	-0.0178129	-0.050415	0.0419702	0.0287721	-0.0143957	0.0310951	-0.0198675	-0.00368154
0.495164		-0.0282729	-0.0682977	0.0943688	-0.0418136	-0.102962	0.0263632	0.0374749	-0.01666	-0.0871002	-0.0516393	-0.0556731	0.00355513	-0.0136625	0.0146654	-0.0655756	-0.0204744	0.0325518	-0.0449325	-0.0304817	-0.0117753	0.00786878	-0.0241492	-0.0274121	-0.0975109	0.0961269	0.04145	-0.0554945	-0.0216924	-0.0306081	-0.0703928	-0.0676821	-0.00995525	0.0650115	-0.0207537	-0.0637518	-0.00225102	-0.0378136	-0.0485169	-0.0163009	0.0212444	-0.0362131	-0.0813662	-0.00717585	0.0126118	-0.0464506	0.0879193	-0.0105542	-0.0181674
0.579322		-0.0261385	0.0100576	0.0412764	-0.0728466	-0.0678028	0.0154272	0.0533531	-0.0206665	-0.0320155	-0.0467881	-0.0392778	0.024755	-0.0429538	0.00944093	-0.0177998	-0.0103688	-0.0432999	-0.0238249	-0.0279158	0.00936455	-0.0217381	0.0548611	-0.0519364	-0.0252356	0.130709	-0.012321	-0.0144058	0.0111012	-0.0255014	-0.00514718	-0.0298095	-0.0202738	0.0370493	0.0144571	-0.0586303	-0.0514157	-0.104308	-0.0670082	0.0141083	0.017051	0.0128775	-0.0666052	0.0524477	0.0156385	-0.0261739	0.0552784	-0.0673057	0.000577543
0.663447		-0.0742818	-0.0243342	0.00973771	0.0121783	-0.0723221	-0.0391126	0.0683416	-0.0127718	-0.00538271	-0.0203099	-0.0171102	-0.0345989	-0.0298497	0.0178674	-0.0505027	-0.00776436	-0.0384484	0.0393066	-0.0698976	-0.0314412	-0.0721314	0.0337168	-0.0377135	-0.0512833	0.065854	-0.00585792	-0.0532126	0.0184183	0.0199701	-0.0288364	-0.0229942	0.0100457	0.0295697	-0.000883843	-0.0380123	-0.0142831	-0.1012	-0.0801204	-0.0135364	-0.0336658	0.018615	-0.0969602	0.0211499	0.0107343	-0.0198289	0.0472383	-0.0851519	-0.0306319
0.747605		-0.0549005	-0.0349057	0.0237696	-0.0260724	-0.0478235	-0.0185597	0.0632205	0.023847	-0.0193519	0.0185732	-0.0107939	0.013234	-0.0643736	0.0336207	0.024996	0.0126834	-0.0460052	0.00558199	-0.0596935	-0.0370649	0.00920354	0.0417273	0.0362127	-0.0288372	0.075478	-0.0193233	-0.00172554	0.0208079	-0.0411249	-0.00314863	-0.0449639	0.00520215	0.0330712	-0.0193755	-0.0392096	-0.0395033	-0.0438355	-0.0719298	-0.0324368	0.0581852	-0.0112231	-0.130579	0.0358966	-0.0200333	0.0214692	0.0420867	-0.0377804	0.02771
0.83173		-0.0256552	-0.0521249	0.00377645	0.0274605	-0.0442554	-0.00328944	0.0476118	-0.0197033	0.0467634	-0.0036705	-0.0347503	0.0153485	-0.0744402	-0.0260354	-0.0290416	0.00604775	-0.0460727	0.0338206	-0.0474504	-0.0244737	0.0211668	0.0151865	0.0679402	-0.00349561	0.101919	-0.00873887	-0.104623	0.0103151	-0.0447661	0.0630177	-0.041252	0.0185336	-0.0814057	0.0429384	-0.0342125	-0.0125064	-0.151407	-0.0774845	-0.0271778	0.0429004	0.0731189	-0.122186	-0.0200323	0.0414627	-0.0353209	0.0389225	-0.0460105	0.0153333
0.915888		0.0238762	-0.0573991	-0.0618241	0.0251434	-0.0475963	0.0116886	0.0721912	-0.0283767	-0.0013294	-0.018567	-0.0104199	-0.00285273	-0.0220102	-0.00249532	-0.0184609	-0.0203884	-0.00188743	0.0303875	-0.0704681	-0.0280968	0.0206648	-0.0179613	0.0436046	-0.00426959	0.0652097	-0.0147316	-0.0996786	-0.0108772	0.031089	-0.0821853	-0.0352907	0.0169224	-0.0389575	0.0289624	-0.112785	-0.00152781	-0.0998409	-0.0626867	-0.0144259	0.051831	0.0774168	-0.128041	-0.034748	0.00480435	-0.0328794	0.043281	0.0774304	0.00912308
1.00001		-0.0320932	0.014964	-0.0692095	0.0127343	-0.0173248	0.0233245	0.0217503	-0.0340822	-0.0392986	-0.0616497	-0.0288188	-0.0256985	-0.0309158	-0.0385302	0.0224631	-0.00107271	-0.0266426	0.0530777	-0.0446731	-9.25339e-05	-0.00373069	0.0539473	0.0986672	0.0360755	-0.00606619	-0.0272868	-0.090438	0.0120336	0.0584964	-0.0702277	-0.0131644	-0.0147141	-0.0186213	-0.0328156	-0.136297	0.0505251	-0.0923573	-0.0671406	0.0438871	-0.025943	-0.014691	-0.109358	-0.0161763	0.00523609	-0.0972208	-0.0169899	0.0640177	0.0221252
1.08417		0.0106415	-0.0400943	-0.0358742	0.0255649	-0.0140785	0.0114087	-0.0462307	0.00581978	-0.0292958	-0.0216193	-0.0181209	-0.036518	-0.0426646	-0.00526269	-0.0286692	0.0531924	-0.0240568	0.0507519	-0.025411	-0.0264245	-0.0784149	-0.0297059	0.0109097	0.0324172	0.0527282	-0.0334724	0.00309359	0.0384248	0.0413438	-0.00380071	-0.0393836	-0.0289541	0.037118	-0.0765495	-0.140734	0.0719531	-0.0908654	-0.0419251	0.0848345	-0.0283709	0.03358	-0.0679064	-0.0433454	-0.0329504	0.0163794	-0.0860754	-0.0478688	0.016124
1.16833		0.0168531	-0.0969596	-0.000250265	-0.00845995	-0.037141	-0.0283326	-0.00454547	0.0321684	-0.00745552	-0.0102893	-0.0191208	-0.0596742	-0.0416943	-0.056957	-0.00879543	0.0270822	-0.0480834	0.088146	-0.0167482	-0.0159436	-0.0373235	-0.0593432	0.0260527	0.00212674	-0.00820192	-0.0548386	0.00803756	0.0493846	-0.0431218	-0.0627476	0.0147417	-0.0439705	-0.0488972	-0.0447495	-0.133566	0.0748329	0.0220964	-0.0367662	0.10007	-0.0678293	0.0011762	-0.00890627	-0.006243	-0.0294331	-0.0666314	-0.050438	-0.0436125	0.0132556
1.25245		0.0070384	-0.0666317	-0.00737877	0.0333134	-0.0195275	-0.0132653	0.0161881	-0.0271631	-0.0574545	-0.0568653	0.0520593	-0.019851	-0.0376642	0.0273711	-0.00458672	0.0778189	-0.0374633	0.0257755	-0.0385985	0.0521357	-0.0131165	-0.0510214	-0.0524004	0.0271309	0.0248122	0.00380549	-0.0605951	-0.0181062	-0.0290377	-0.0454015	0.03052	-0.0566499	-0.0492955	-0.0126877	-0.086236	0.080388	-0.0521906	-0.0749857	0.0887546	-0.0594795	0.0562995	-0.00809377	-0.0104957	-0.0315492	-0.0245456	-0.107427	-0.0655962	0.00111956
1.33661		-0.0259144	-0.0402759	-0.0354759	-0.0270056	-0.01385	-0.0208629	-0.0169788	0.00453894	-0.0930386	-0.0305002	0.051355	-0.066991	0.0232713	0.0303616	-0.0442117	0.049912	-0.0226998	-0.00963204	0.0153762	0.0234875	0.0151036	-0.00449236	-0.0517358	-0.0218728	-0.00230774	-0.0350574	-0.0105881	0.0190282	-0.042143	-0.0202626	0.0182119	-0.105379	-0.0401301	0.0293602	-0.0467123	0.0724403	0.0365039	-0.0674751	0.0506838	-0.124136	0.0529507	0.0502091	-0.0269045	-0.0701974	-0.0248578	-0.124474	-0.0864931	0.0409048
1.42074		-0.0052392	-0.0457998	-0.00671277	0.024515	-0.0426329	-0.0266019	0.0299644	-0.00779497	-0.0248693	-0.0292464	0.0650358	-0.0323241	0.0747282	0.0209022	-0.0459671	-0.0144704	-0.0011476	-0.0237969	0.0206696	0.0466674	0.00722028	-0.0493334	-0.0386947	0.00708203	0.0178318	-0.00602918	0.0506375	0.00586942	-0.0340577	-0.0530356	-0.0337665	-0.0596608	-0.00142505	-0.0186015	0.00532538	0.0568013	-0.0686621	-0.0526237	0.0751087	-0.020924	0.0769685	0.0637063	0.0137873	-0.0313192	-0.00110592	-0.109514	-0.10235	-0.0187388
1.5049		0.000322553	-0.0521555	-0.0219147	-0.015969	-0.0505212	-0.017116	0.00912567	-0.0236933	-0.00868672	-0.0511833	0.086205	-0.0562793	0.0508147	-0.0168866	-0.0614352	-0.0846358	0.030246	-0.0247083	0.000684148	0.0323362	-0.00547632	-0.000415598	-0.00269899	0.000685765	-0.0112631	0.00667313	-0.0100293	0.00384779	-0.00286197	-0.0481861	-0.0228169	-0.0504999	-0.037043	0.0498793	0.0205174	0.0489297	-0.0795272	-0.0228408	0.0378682	-0.0523557	0.0760528	0.0816874	-0.0100822	-0.0504748	0.0308627	-0.0819296	-0.0911422	-0.0262409
1.58902		-0.0138492	-0.0326125	-0.0504557	0.0403556	-0.0536713	-0.00057139	0.0263677	-0.00885013	-0.042819	-0.0222248	0.106045	-8.98938e-05	-0.0245432	0.031549	-0.0547824	-0.0473268	-0.0202188	0.00848609	0.00442058	0.0491204	-0.0447175	-0.00753397	-0.0555238	-0.0159369	-0.0737226	0.0367936	0.0024914	-0.0130432	-0.021335	-0.0438656	-0.0415197	0.0120805	-0.0526124	0.0497097	0.0266386	0.0583348	-0.0290157	-0.0126213	0.0370927	-0.0156629	-0.0045888	0.086851	-0.0638862	-0.0501921	0.0169579	-0.0571929	-0.127831	-0.0192304
1.67318		-0.0318487	-0.038682	-0.00243905	0.0455681	-0.0917914	0.0164167	0.0438199	-0.0424096	-0.107012	-0.0175284	0.0331139	-0.0139056	0.00946552	-0.0223511	-0.00748137	-0.0508772	-0.0287707	0.0136658	0.0158855	0.00575512	-0.0359879	0.0177179	0.0353663	-0.0441997	0.0286668	0.00346331	-0.0426311	-0.00235265	-0.0160305	-0.00548803	-0.0418488	-0.0482102	-0.0201638	0.0273012	0.0774882	0.0492194	-0.0309082	0.0150094	-0.0116492	-0.00956102	-0.0274176	0.0285519	-0.0637821	-0.00797266	0.00445918	-0.0972384	-0.130044	-0.0538046
1.7573		-0.0204199	-0.029551	0.0220406	0.0267418	-0.00745638	-0.00205336	0.0754278	-0.00221114	-0.041221	-0.00766909	0.0168816	-0.0215874	0.0014938	-0.00369	-0.0147146	0.0322202	0.00363117	-0.00631753	-0.0222491	-0.0148448	-0.0494442	-0.0226586	-0.0407986	-0.0846866	-0.0020108	0.0275265	-0.0225554	-0.0208417	-0.0410536	0.0195774	-0.0174311	-0.0645294	0.0093072	0.00494618	0.0803567	-0.0041412	-0.0866631	0.00315003	0.0221985	0.0457231	-0.0019656	0.0617863	-0.0454708	-0.00792219	-0.00130663	-0.0661495	-0.138328	-0.069617
1.84146		-0.0204085	0.0704871	-0.057838	0.0961091	-0.0312342	-0.0149607	0.0490205	-0.075881	-0.0100275	-0.00267122	-0.0796943	0.0426337	0.0112246	-0.0738787	-0.0619165	0.0232676	0.0155956	-0.00655548	-0.00969491	0.0102694	0.0236764	-0.00355383	-0.00978249	-0.0479327	0.0581989	-0.0426961	-0.0399462	-0.0667235	-0.0868163	-0.0515756	-0.0398606	-0.110391	0.0162273	0.00825727	0.0753692	-0.0351015	-0.0165845	0.0853759	0.0150536	0.0229147	-0.000415077	0.0593131	-0.0873496	-0.0394834	-0.00205473	-0.0403097	-0.104222	-0.0687318
1.92559		0.00441468	0.0751041	-0.0193142	0.0269987	-0.0558766	0.00846043	0.0162579	-0.0500782	-0.0424879	-0.00334022	0.0284223	0.0664807	0.0659351	-0.0391707	-0.0195284	0.0193375	0.00853353	0.0134425	0.00789544	-0.0363775	0.000378258	0.0312944	-0.0501475	-0.0238923	0.0579549	-0.055818	0.0223908	-0.000760773	-0.0768224	-0.0584927	-0.0188628	-0.0688624	-0.0500791	-0.0164043	0.0647129	-0.0480517	0.0416933	0.112727	-0.000534225	0.000884919	0.00120798	0.0895149	-0.103005	-0.0139711	0.00371253	-0.0530831	-0.144083	-0.071008
2.00975		-0.00794963	0.00365984	-0.0508849	0.0526036	-0.0561911	-0.0252662	-0.0104961	-0.0215875	-0.0442628	-0.0173324	-0.0206715	0.0297114	0.0389832	-0.0609435	-0.0363725	0.0462196	0.0304455	-0.00968275	0.0868311	-0.0191649	-0.0199213	0.00773962	-0.0447172	-0.0327982	0.088	-0.0126737	-0.0133389	0.016001	0.00304628	0.0318907	-0.0169192	-0.0791629	-0.0256879	0.000519952	0.0702087	-0.0634178	-0.0237731	0.00288356	-0.0623227	-0.052772	-0.0966387	0.10936	-0.108923	0.00656382	0.0117163	0.00716321	0.00486894	-0.106651
2.09387		-0.0621087	0.0528846	-0.0671376	0.0209412	-0.0156151	0.0112021	-0.0452284	-0.0412443	-0.0396075	0.0110093	-0.0548748	0.0526955	0.0715165	-0.0176186	0.000361864	0.0122916	0.0278686	-0.00879004	0.00183174	0.00939897	-0.0640418	-0.0509028	-0.0413052	-0.0270089	0.0501321	-0.0399671	-0.00447307	-0.0144393	0.0386837	-0.00559912	0.0962159	0.0199238	-0.0431783	0.0167706	0.0524589	-0.0613447	0.00354927	-0.0140594	-0.0272773	-0.048617	-0.0446709	0.109905	-0.0397286	0.0298255	-0.010896	0.0023315	-0.012368	-0.0825016
2.17803		-0.0283729	0.00416377	-0.00385454	-0.0241238	-0.0163653	-0.0118204	0.0391471	0.00619615	-0.0381933	0.0117895	0.0251796	0.0381253	-0.0277155	-0.038137	0.000605907	0.00510503	0.0125979	0.024663	-0.000183783	-0.0529307	-0.00350904	-0.0222287	-0.00933397	-0.0285272	0.0590645	-0.0180947	-0.011523	0.0327096	-0.0235774	-0.0191442	0.0630495	-0.0498803	-0.0633523	-0.00646063	0.0397807	-0.0991076	-0.016208	0.00133999	-0.0621979	-0.0722574	0.00543133	0.116328	-0.0263382	0.0859654	-0.00475114	0.0249997	0.0910274	-0.0231878
2.26219		0.00707596	-0.0124323	-0.0215159	0.0251264	-0.0333059	-0.024365	0.0097342	0.0152485	-0.0341025	-0.0291611	-0.000434644	0.0479661	-0.0203947	-0.0459171	0.00889649	0.0323151	0.0327072	0.0469456	0.0199056	-0.0452914	-0.0424994	0.00747353	0.00381793	-0.013059	0.00534298	-0.0274062	0.0221513	0.0104599	-0.0652199	0.0629554	0.0427139	-0.0268227	-0.0163866	-0.00876028	-0.0233545	-0.0862652	0.0423266	-0.0417342	-0.0460765	-0.0186355	0.0166774	0.101636	-0.0725317	0.0349604	-0.0668951	0.0224103	-0.0135546	0.0213028
2.34631		0.00973982	0.0321997	-0.0243792	-0.0269501	0.00395696	-0.0381624	0.0206593	0.00773041	-0.0391402	0.0264268	-0.0221073	0.0581947	-0.00413295	-0.0100312	-0.0282685	0.0448129	0.00984172	0.0322511	0.0312197	-0.0493646	-0.0136713	0.0208194	-0.00146592	-0.0386501	-0.0184134	-0.0596804	0.0209615	0.0218616	-0.0702766	0.0382528	0.0121371	-0.0132134	0.0211286	0.0562163	0.0433404	-0.114078	0.0478013	-0.0925767	-0.00838523	-0.0553442	0.0149545	0.0695355	0.000260737	0.0538779	-0.0853203	0.0772492	0.0207622	-0.0210144
2.43047		0.0215215	-0.0244258	-0.0174085	-0.00178701	-0.0102665	0.0162175	0.0154197	-0.0170321	-0.0395935	0.0637513	-0.0295175	0.0466095	-0.0427897	-0.0214735	0.0164912	0.0100362	-0.00723346	0.0387408	0.00472655	-0.0355008	-0.0549887	0.019216	-0.0111692	0.0341973	-0.00856037	-0.0453638	0.0409208	0.00745821	-0.0372533	-0.0134365	-0.0268327	-0.0403115	-0.0415521	0.0429827	-0.016625	-0.123445	0.00292956	-0.0576803	-0.0204047	0.0079505	-0.0228421	0.0452332	0.0101171	0.0841074	-0.0362618	0.0570252	0.0550484	-0.033712
2.5146		0.00992382	0.00179023	-0.0175936	0.0173528	0.00130102	-0.0395578	0.0243559	-0.0244306	-0.00324725	0.051235	0.0468207	0.00605793	0.0217455	-0.033989	-0.0109739	0.0280292	0.0383178	-0.00342793	-0.000558104	-0.00866834	0.00535149	0.0110817	0.0105955	-0.0432518	0.0148527	-0.072215	0.0220824	0.0110085	-0.0698115	-0.0223392	0.00510578	-0.0220093	0.0352695	0.0427079	-0.00835282	-0.0811651	0.0333056	0.0287145	-0.0647751	0.0457134	-0.0477596	0.0538068	-0.0246731	0.0685904	-0.0539621	0.021536	0.14922	0.00257078
2.59875		-0.00460342	0.0206902	-0.0556712	-0.0191797	-0.00759723	-0.00937178	0.0044193	-0.0361427	-0.0227922	0.0755859	0.0500306	-0.0247096	0.0949819	-0.0771789	0.0103657	0.0330041	-0.00591414	0.000237856	0.0336934	0.0238245	0.00505431	0.0257971	0.0266947	-0.0164752	0.0337222	0.00644131	-0.00943633	0.0521032	0.0313348	-0.0404301	0.0389407	-0.0044863	-0.00593651	0.105851	-0.00890181	0.00235937	0.00504595	0.0564424	-0.00660359	0.0602995	-0.0402238	0.0784564	-0.0388065	0.0153235	0.00434416	-0.0347863	0.178951	0.00318915
2.68288		-0.0190547	-0.0183094	-0.0392145	0.0169088	-0.0285761	-0.0238585	0.013623	-0.00194599	0.00831421	0.0699293	0.0328252	-0.0515778	0.0421264	-0.0226114	-0.0300013	0.00824968	0.0231893	-0.0153799	0.0251733	0.00462853	-0.00460542	-0.0147355	0.00863485	0.00951856	-0.0441346	-0.0214965	0.00436236	-0.0533925	0.0151621	-0.0845356	-0.00182405	-0.0110444	0.00737398	0.0519098	-0.031813	0.0221212	0.0300994	0.0210196	-0.0636684	0.0805159	-0.0104826	0.00173431	-0.0268792	0.0102069	-0.00237382	-0.0102555	0.0988619	-0.0163663
2.76704		-0.0128531	0.027866	0.0194679	0.00281907	0.017396	-0.0125349	-0.0354055	-0.0219936	0.0527097	0.0104616	-0.00345296	-0.0426577	0.0237141	-0.0531467	0.00927244	-0.0201588	-0.0293302	-0.0157562	0.0402788	0.00140222	-0.0441899	-0.0179649	0.0059229	-0.0122399	-0.0845291	-0.0359305	0.0234727	0.00111648	-0.0077653	0.0209934	-0.042067	0.0191504	-0.0245573	0.043902	-0.0287315	0.0245673	-0.0180665	0.0275766	-0.0266868	0.0274016	-0.0203184	0.0271363	-0.0309582	0.037695	0.0699834	-0.0445269	0.0272934	0.01614
2.85116		-0.0694704	0.104109	-0.071685	-0.01926	-0.00900109	0.00421364	-0.0997094	-0.0478054	0.0196481	-0.0125071	0.0547549	0.0108061	-0.0298259	-0.0326744	-0.00310252	-0.0279469	-0.00755964	-0.0384239	0.0451845	-0.019046	-0.0143341	0.0166327	-0.00930554	-0.0903703	-0.115729	-0.0383794	0.0760189	-0.00896928	0.0848822	-0.00335785	-0.0013481	-0.00328328	0.012848	0.00212994	-0.0474137	-0.0134124	0.0855807	-0.0387891	-0.075859	0.0098375	-0.0816915	0.0427599	0.0155423	0.0392984	0.00148259	0.0176051	0.0641123	-0.023279
2.93532		-0.076883	0.0804272	-0.0761203	0.0131399	0.0372914	0.0158644	-0.109768	0.0117884	0.00544831	0.0224753	0.0491786	-0.0278239	-0.0787943	-0.00463403	0.00491063	0.00788948	-0.0113364	-0.0355564	0.0338786	-0.0272029	-0.0432597	0.015931	-0.039688	0.0155089	-0.0938534	-0.0639265	0.0889847	0.013504	0.0178526	-0.000808535	-0.00472148	0.0175769	0.00279336	-0.0490749	-0.0571918	-0.000843843	-0.0327782	0.0141907	-0.034877	0.0193482	-0.0853457	0.0549571	-0.0153935	0.0359741	-0.0818093	-0.0230253	0.0542806	-0.0248628
3.01944		-0.0140292	0.102946	-0.00871457	0.011384	0.116401	0.0287278	-0.0344282	-0.0261607	-0.0669162	0.0259427	-0.00843528	-0.0524586	-0.0683347	-0.0262847	-0.0103378	-0.0553631	0.035073	-0.0222842	-0.0153794	-0.0350265	0.0591594	-0.0317903	0.00686145	-0.00486833	-0.0562778	-0.0301779	0.087688	0.0207142	0.00883653	0.000330691	0.0190686	0.0163604	0.0122434	0.0181408	-0.0233824	-0.0338098	-0.042363	-0.0255508	-0.0170418	0.0154529	-0.0575295	0.0916617	0.0353578	0.0200538	-0.0266505	0.023747	0.0416216	-0.0686677
3.1036		-0.0480499	0.0466055	0.00653286	-0.0262833	0.108054	-0.038359	-0.0359344	-0.0284079	0.0118205	0.0154264	-0.0159737	-0.00677909	-0.058419	8.38252e-05	0.0136026	-0.0565153	-0.0324868	0.0387828	0.0432185	-0.0386578	-0.0516112	0.0393813	-0.0263731	0.0678232	-0.0708933	-0.0128542	0.118356	0.00496045	-0.0177892	-0.0358091	0.0112272	-0.00764746	0.0195963	0.000680901	-0.0386142	-0.0205221	-0.0280673	-0.0620781	-0.0293986	0.00973692	0.00564888	0.0432529	0.0456064	-0.00570561	0.0196919	0.0382441	0.10711	-0.142068
3.18773		-0.0470555	0.0530809	0.0278689	-0.00268717	0.0897501	-0.0133627	-0.0210593	0.026948	-0.0471977	-0.0362951	0.0317596	-0.0100832	-0.05308	-0.0505871	0.0197403	-0.0219478	0.0551477	0.0219176	0.027962	-0.00981295	-0.0541778	0.0296842	-0.00603305	0.0325654	-0.057795	-0.0424899	0.0669781	0.060374	-0.103735	-0.0571318	0.0122447	0.018278	0.0144824	-0.0127449	-0.0277092	-0.0188282	0.0234156	-0.0330857	-0.032575	-0.00357955	-0.0281404	0.0466502	-0.0153797	0.0291139	-0.00847378	0.0507486	0.0565108	-0.14178
3.27189		0.0211563	-0.0449991	0.0533035	0.0107558	0.0100751	0.000598101	-0.0183789	0.0301259	-0.0383541	0.0174228	-0.0121542	-0.0279634	-0.0218398	-0.00232847	0.0224203	0.000449369	0.0281013	-0.00497087	0.074107	-0.0319202	-0.0145246	-0.0122752	0.0319461	0.0471226	-0.0594696	0.0119728	0.0791366	-0.00624002	0.00758833	-0.00870956	-0.0203748	-0.00282417	0.0515984	-0.0392999	-0.041915	0.0123569	0.0393414	0.0100232	-0.0395872	-0.0171555	-0.0879515	0.0316953	0.0695593	0.0266398	-0.0263607	0.0106644	0.0863803	-0.141257
3.35601		-0.0115091	0.1091	0.0717542	-0.0083294	-0.0334069	-0.00167399	-0.0298149	-0.00315324	-0.0281265	0.0285678	-0.0473531	-0.0421438	-0.0225175	-0.00836139	0.0579903	0.0136896	0.0560363	0.0168338	0.0621783	-0.0133638	-0.00242828	0.00447607	-0.00321859	0.087127	-0.104068	0.0180043	0.0347666	-0.0143528	0.00583232	-0.0743246	0.015581	0.0066657	-0.0117847	-0.0208907	-0.0913134	0.0346008	0.0223239	-0.0512094	-0.0376232	-0.0216287	-0.0671024	0.0494256	0.0644472	0.0462296	0.0176587	0.0100403	0.0728592	-0.0755047
3.44017		-0.00865876	-0.0120056	0.0849936	-0.0358567	-0.00195175	-0.0159003	0.00323741	0.0269817	-0.00749208	-0.0173175	-0.027808	-0.0352013	-0.0901124	0.0277355	0.0572673	-0.0076891	0.00889054	-0.0440978	0.0178739	-0.0185506	0.0075916	0.0250258	0.00197054	0.0899513	-0.0503377	0.0358592	0.0210697	-0.029824	0.0704333	-0.0496994	-0.0193448	-0.030081	0.0180951	-0.0189635	-0.0525044	0.00680916	0.0654554	-0.007109	-0.0646173	-0.00504072	-0.0297353	0.0139108	0.0253169	0.0484315	-0.0353934	0.0828111	0.0420752	-0.0595007
[truncated: 97 more rows]
[truncated: 51 more columns]
