# Supplementary material for: Chronic exposure to odors at naturally occurring concentrations triggers limited plasticity in early stages of Drosophila olfactory processing
Source: eLife. 2023 May 30;12:e85443. doi: 10.7554/eLife.85443 (PMC10229125; doi:10.7554/eLife.85443)
Supplement: Figure 7—source data 1. [file elife-85443-fig7-data1.xlsx]

## Sheet: Sheet1
DL5, firing rate (spikes/s)
exposure cond.	E2-hexenal					solvent
n	4					4
I (pA)	firing rate (spikes/s)					firing rate (spikes/s)
0	0	0	0	0		0	0	0	0
0.1	0	0	0	0		0	0	0	0
0.2125	0	0	0	0		0	0	0	0
0.325	0	0	0	0		0	0	0	0
0.4375	0	0	0	0		0	0	0	0
0.55	0	0	0	0		0	0	0	0
0.6625	0	0	0	0		0	0	0	0
0.775	0	0	0	0		0	0	0	0
0.8875	0	0	0	0		0	0	0	0
1	0	0	0	0		0	0	0	0
1.1125	0	0	0	0		0	0	0	0
1.225	0	0	0	0		0	0	0	0
1.3375	0	0	0	0		0	0	0	0
1.45	0	0	0	0		0	0	0	0
1.5625	0	0	0	0		0	0	0	0
1.675	0	0	0	0		0	0	0	0
1.7875	0	0	0	0		0	0	0	0
1.9	0	0	0	0		0	0	0	0
2.0125	0	0	0	0		0	0	0	0
2.125	0	0	0	0		0	0	0	0
2.2375	0	0	0	0		0	0	0	0
2.35	0	0	0	0		0	0	0	0
2.4625	0	0	0	0		0	0	0	0
2.575	0	0	0	0		0	0	0	0
2.6875	0	0	0	0		0	0	0	0
2.8	0	0	0	0		0	0	0	0
2.9125	0	0	0	0		0	0	0	0
3.025	0	0	0	0		0	0	0	0
3.1375	0	0	0	0		0	0	0	0
3.25	0	0	0	0		0	0	0	0
3.3625	0	0	0	0		0	0	0	0
3.475	0	0	0	0		0	0	0	0
3.5875	0	0	0	0		0	0	0	0
3.7	0	0	0	0		0	0	0	0
3.8125	0	0	0	0		0	0	0	0
3.925	0	0	0	0		0	0	0	0
4.0375	0	0	0	0		0	0	0	0
4.15	0	0	0	0		0	0	0	0
4.2625	0	0	0	0		0	0	0	0
4.375	0	0	0	0		0	0	0	0
4.4875	0	0	0	0		0	0	0	0
4.6	0	0	0	0		0	0	0	0
4.7125	0	0	0	0		0	0	0	0
4.825	0	0	0	0		0	0	0	0
4.9375	0	0	0	0		0	0	0	0
5.05	0	0	0	0		0	0	0	0
5.1625	0	0	0	0		0	0	0	0
5.275	0	0	0	0		0	0	0	0
5.3875	0	0	0	0		0	0	0	0
5.5	0	0	0	0		0	0	0	0
5.6125	0	0	0	0		0	0	0	0
5.725	0	0	0	0		0	0	0	0
5.8375	0	0	0	0		0	0	0	0
5.95	0	0	0	0		0	0	0	0
6.0625	0	0	0	0		0	0	0	0
6.175	0	0	0	0		0	0	0	0
6.2875	0	0	0	0		0	0	0	0
6.4	0	0	0	0		0	0	0	0
6.5125	0	0	0	0		0	0	0	0
6.625	0	0	0	0		0	0	0	0
6.7375	0	0	0	0		0	0	0	0
6.85	0	0	0	0		0	0	0	0
6.9625	0	0	0	0		0	0	0	0
7.075	0	0	0	0		0	0	0	0
7.1875	0	0	0	0		0	0	0	0
7.3	0	0	0	0		0	0	0	0
7.4125	0	0	0	0		0	0	0	0
7.525	0	0	0	0		0	0	0	0
7.6375	0	0	0	0		0	0	0	0
7.75	0	0	0	0		0	0	0	0
7.8625	0	0	0	0		0	0	0	0
7.975	0	0	0	0		0	0	0	0
8.0875	0	0	0	0		0	0	0	0
8.2	0	0	0	0		0	0	0	0
8.3125	0	0	0	0		0	0	0	0
8.425	0	0	0	0		0	0	0	0
8.5375	0	0	0	0		0	0	0	0
8.65	0	0	0	0		0	0	0	0
8.7625	0	0	0	0		0	0	0	0
8.875	0	0	0	0		0	0	0	0
8.9875	0	0	0	0		0	0	0	0
9.1	0	0	0	0		0	0	0	0
9.2125	0	0	0	0		0	0	0	0
9.325	0	0	0	0		0	0	0	0
9.4375	0	0	0	0		0	0	0	0
9.55	0	0	0	0		0	0	0	0
9.6625	0	0	0	0		0	0	0	0
9.775	0	0	0	0		0	0	0	0
9.8875	0	0	0	0		0	0	0	0
10	0	0	0	0		0	0	0	0
10.1125	0	0	0	0		0	0	0	0
10.225	0	0	0	0		0	0	0	0
10.3375	0	0	0	0		0	0	0	0
10.45	0	0	0	0		0	0	0	0
10.5625	0	0	0	0		0	0	0	0
10.675	0	0	0	0		0	0	0	0
10.7875	0	0	0	0		0	0	0	0
10.9	0	0	0	0		0	0	0	0
11.0125	0	0	0	0		0	0	0	0
11.125	0	0	0	0		0	0	0	0
11.2375	0	0	0	0		0	0	0	0
11.35	0	0	0	0		0	0	0	0
11.4625	0	0	0	0		0	0	0	0
11.575	0	0	0	0		0	0	0	0
11.6875	0	0	0	0		0	0	0	0
11.8	0	0	0	0		0	0	0	0
11.9125	0	0	0	0		0	0	0	0
12.025	0	0	0	0		0	0	0	0
12.1375	0	0	0	0		0	0	0	0
12.25	0	0	0	0		0	0	0	0
12.3625	0	0	0	0		0	0	0	0
12.475	0	0	0	0		0	0	0	0
12.5875	0	0	0	0		0	0	0	0
12.7	0	0	0	0		0	0	0	0
12.8125	0	0	0	0		0	0	0	0
12.925	0	0	0	0		0	0	0	0
13.0375	0	0	0	0		0	0	0	0
13.15	0	0	0	0		0	0	0	0
13.2625	0	0	0	0		0	0	0	0
13.375	0	0	0	0		0	0	0	0
13.4875	0	0	0	0		0	0	0	0
13.6	0	0	0	0		0	0	0	0
13.7125	0	0	0	0		0	0	0	0
13.825	0	0	0	0		0	0	0	0
13.9375	0	0	0	0		0	0	0	0
14.05	0	0	0	0		0	0	0	0
14.1625	0	0	0	0		0	0	0	0
14.275	0	0	0	0		0	0	0	0
14.3875	0	0	0	0		0	0	0	0
14.5	0	0	0	0		0	0	0	0
14.6125	0	0	0	0		0	0	0	0
14.725	0	0	0	0		0	0	0	0
14.8375	0	0	0	0		0	6.66667	0	0
14.95	0	0	0	0		0	6.66667	0	0
15.0625	0	0	0	0		0	0	0	0
15.175	0	0	0	0		0	0	0	0
15.2875	0	0	0	0		0	0	0	0
15.4	0	0	0	0		0	0	0	0
15.5125	0	0	0	0		0	0	0	0
15.625	0	0	0	0		0	0	0	0
15.7375	0	0	0	0		0	0	0	0
15.85	0	0	0	0		0	0	0	0
15.9625	0	0	0	0		0	0	0	0
16.075	0	0	0	0		0	0	0	0
16.1875	0	0	0	0		0	0	0	0
16.3	0	0	0	0		0	0	0	0
16.4125	0	0	0	0		0	0	0	0
16.525	0	0	0	0		0	0	0	0
16.6375	0	0	0	0		0	0	0	0
16.75	0	0	0	0		0	0	0	0
16.8625	0	0	0	0		0	0	0	0
16.975	0	0	0	0		0	0	0	0
17.0875	0	0	0	0		0	0	0	0
17.2	0	0	0	0		0	0	0	0
17.3125	0	0	0	0		0	0	0	0
17.425	0	0	0	0		0	6.66667	0	0
17.5375	0	0	0	0		0	6.66667	0	0
17.65	0	0	0	0		0	0	0	0
17.7625	0	0	0	0		0	0	0	0
17.875	0	0	0	0		0	0	0	0
17.9875	0	0	0	0		0	0	0	0
18.1	0	0	0	0		0	0	0	0
18.2125	0	0	0	0		0	0	0	0
18.325	0	0	0	0		0	0	0	0
18.4375	0	0	0	0		0	0	0	0
18.55	0	0	0	0		0	0	0	0
18.6625	0	0	0	0		0	0	0	0
18.775	0	0	0	0		0	0	0	0
18.8875	0	0	0	0		0	0	0	0
19	0	0	0	0		0	0	0	0
19.1125	0	0	0	0		0	0	0	0
19.225	0	0	0	0		0	0	0	0
19.3375	0	0	0	0		0	0	0	0
19.45	0	0	0	0		0	0	0	0
19.5625	0	0	0	0		0	0	0	0
19.675	0	0	0	0		0	0	0	0
19.7875	0	0	0	0		0	0	0	0
19.9	0	0	0	0		0	0	0	0
20.0125	0	0	0	0		0	0	0	0
20.125	0	0	0	0		0	6.66667	0	0
20.2375	0	0	0	0		0	6.66667	0	0
20.35	0	0	0	0		0	0	0	0
20.4625	0	0	0	0		0	6.66667	0	0
20.575	0	0	0	0		0	6.66667	0	0
20.6875	0	0	0	0		0	0	0	0
20.8	0	0	0	0		0	6.66667	0	0
20.9125	0	0	0	0		0	6.66667	0	0
21.025	0	0	0	0		0	6.66667	0	0
21.1375	0	0	0	0		0	6.66667	0	0
21.25	0	0	0	0		0	6.66667	0	0
21.3625	0	0	0	0		0	6.66667	6.66667	0
21.475	0	0	0	0		0	0	6.66667	0
21.5875	0	0	0	0		0	6.66667	0	0
21.7	0	0	0	0		0	6.66667	0	0
21.8125	0	0	0	0		0	0	0	0
21.925	0	0	0	0		0	0	0	0
22.0375	0	0	0	0		0	0	0	0
22.15	0	0	0	0		0	0	0	0
22.2625	0	0	0	0		0	6.66667	0	0
22.375	0	0	0	0		0	13.3333	0	0
22.4875	0	0	0	0		0	6.66667	0	0
22.6	0	0	0	0		0	0	0	0
22.7125	0	0	0	0		0	6.66667	0	0
22.825	0	0	0	0		0	6.66667	0	0
22.9375	0	6.66667	0	0		0	6.66667	0	0
23.05	0	6.66667	0	0		0	6.66667	0	0
23.1625	0	0	0	0		0	0	0	0
23.275	0	0	0	0		0	0	0	0
23.3875	0	0	0	0		0	6.66667	0	0
23.5	0	0	0	0		0	6.66667	0	0
23.6125	0	0	0	0		0	6.66667	6.66667	0
23.725	0	0	0	6.66667		0	6.66667	6.66667	0
23.8375	0	0	0	6.66667		0	0	0	0
23.95	0	0	0	0		0	0	0	0
24.0625	0	0	0	6.66667		0	6.66667	0	0
24.175	0	0	0	6.66667		0	6.66667	6.66667	0
24.2875	0	0	0	0		0	0	6.66667	6.66667
24.4	0	0	0	0		0	0	0	6.66667
24.5125	0	0	0	0		0	6.66667	6.66667	0
24.625	0	0	0	0		0	13.3333	6.66667	0
24.7375	0	0	0	0		0	6.66667	0	0
24.85	0	6.66667	0	0		0	6.66667	6.66667	0
24.9625	0	6.66667	0	0		0	13.3333	6.66667	0
25.075	0	0	0	0		0	13.3333	0	0
25.1875	0	0	0	0		0	6.66667	6.66667	6.66667
25.3	0	0	0	6.66667		0	0	6.66667	6.66667
25.4125	0	0	0	6.66667		0	13.3333	0	0
25.525	0	0	0	0		0	13.3333	0	0
25.6375	0	0	0	6.66667		0	0	0	0
25.75	0	0	0	6.66667		0	13.3333	0	6.66667
25.8625	0	0	0	6.66667		0	13.3333	13.3333	13.3333
25.975	0	6.66667	0	6.66667		0	0	13.3333	6.66667
26.0875	0	6.66667	0	0		0	0	0	0
26.2	0	0	0	0		0	6.66667	0	6.66667
26.3125	0	6.66667	0	6.66667		0	6.66667	0	6.66667
26.425	0	6.66667	0	6.66667		0	0	6.66667	6.66667
26.5375	6.66667	0	0	0		0	6.66667	6.66667	6.66667
26.65	6.66667	0	0	6.66667		0	13.3333	6.66667	6.66667
26.7625	0	0	0	6.66667		0	6.66667	13.3333	6.66667
26.875	0	6.66667	0	0		0	6.66667	6.66667	0
26.9875	0	6.66667	0	0		0	6.66667	6.66667	0
27.1	0	6.66667	0	0		0	0	6.66667	0
27.2125	0	6.66667	0	0		0	6.66667	0	0
27.325	0	0	0	6.66667		0	6.66667	6.66667	6.66667
27.4375	0	0	0	13.3333		0	13.3333	13.3333	6.66667
27.55	0	0	0	6.66667		0	13.3333	13.3333	6.66667
27.6625	0	0	0	0		0	6.66667	6.66667	6.66667
27.775	0	6.66667	0	0		0	6.66667	0	6.66667
27.8875	0	13.3333	0	0		0	0	0	13.3333
28	0	13.3333	0	6.66667		0	6.66667	0	6.66667
28.1125	0	6.66667	0	13.3333		0	13.3333	6.66667	0
28.225	0	6.66667	0	13.3333		0	13.3333	13.3333	0
28.3375	0	6.66667	0	6.66667		0	6.66667	13.3333	6.66667
28.45	0	6.66667	0	6.66667		0	6.66667	6.66667	6.66667
28.5625	0	13.3333	0	6.66667		0	13.3333	0	0
28.675	0	6.66667	0	0		0	13.3333	0	6.66667
28.7875	0	13.3333	0	0		0	13.3333	6.66667	6.66667
28.9	0	13.3333	0	0		0	6.66667	6.66667	6.66667
29.0125	0	6.66667	0	13.3333		0	13.3333	13.3333	13.3333
29.125	6.66667	6.66667	0	13.3333		0	13.3333	13.3333	6.66667
29.2375	6.66667	6.66667	0	6.66667		0	0	0	0
29.35	0	13.3333	0	6.66667		0	6.66667	0	6.66667
29.4625	0	6.66667	0	0		0	13.3333	6.66667	13.3333
29.575	0	0	0	0		0	20	6.66667	6.66667
29.6875	0	0	0	6.66667		0	13.3333	6.66667	0
29.8	0	6.66667	0	6.66667		0	6.66667	13.3333	6.66667
29.9125	0	13.3333	0	6.66667		0	13.3333	6.66667	13.3333
30.025	0	6.66667	0	6.66667		0	13.3333	0	6.66667
30.1375	0	6.66667	0	6.66667		0	6.66667	6.66667	6.66667
30.25	0	6.66667	0	13.3333		0	13.3333	13.3333	6.66667
30.3625	0	0	0	6.66667		0	13.3333	6.66667	6.66667
30.475	0	13.3333	0	6.66667		0	0	6.66667	13.3333
30.5875	6.66667	13.3333	0	6.66667		0	13.3333	13.3333	13.3333
30.7	6.66667	6.66667	0	0		0	13.3333	13.3333	6.66667
30.8125	0	6.66667	0	6.66667		0	6.66667	6.66667	6.66667
30.925	0	0	0	13.3333		0	20	6.66667	6.66667
31.0375	6.66667	6.66667	0	6.66667		0	13.3333	13.3333	0
31.15	6.66667	13.3333	0	6.66667		0	6.66667	6.66667	13.3333
31.2625	0	6.66667	0	6.66667		0	20	6.66667	20
31.375	0	0	0	0		0	13.3333	13.3333	6.66667
31.4875	0	20	0	6.66667		0	6.66667	13.3333	0
31.6	0	20	0	6.66667		0	20	6.66667	6.66667
31.7125	6.66667	0	0	6.66667		0	20	13.3333	13.3333
31.825	6.66667	6.66667	0	20		0	13.3333	13.3333	13.3333
31.9375	6.66667	20	0	13.3333		0	6.66667	0	13.3333
32.05	6.66667	13.3333	0	6.66667		0	20	13.3333	6.66667
32.1625	0	13.3333	0	20		0	20	20	0
32.275	0	13.3333	0	13.3333		0	6.66667	6.66667	6.66667
32.3875	0	6.66667	0	0		0	13.3333	6.66667	13.3333
32.5	0	20	0	13.3333		0	13.3333	20	13.3333
32.6125	0	13.3333	0	13.3333		0	6.66667	13.3333	6.66667
32.725	0	6.66667	6.66667	0		0	13.3333	6.66667	13.3333
32.8375	6.66667	13.3333	6.66667	6.66667		0	20	6.66667	13.3333
32.95	6.66667	13.3333	0	20		0	13.3333	0	6.66667
33.0625	0	13.3333	0	13.3333		0	13.3333	20	13.3333
33.175	6.66667	20	0	6.66667		0	20	20	13.3333
33.2875	6.66667	13.3333	0	20		0	20	0	6.66667
33.4	0	0	0	13.3333		0	6.66667	20	13.3333
33.5125	0	13.3333	0	6.66667		0	20	20	13.3333
33.625	0	20	6.66667	13.3333		0	20	0	0
33.7375	13.3333	13.3333	6.66667	20		0	6.66667	0	13.3333
33.85	13.3333	13.3333	0	13.3333		0	20	20	13.3333
33.9625	0	13.3333	0	20		0	20	20	6.66667
34.075	0	13.3333	0	20		0	20	0	6.66667
34.1875	6.66667	6.66667	0	6.66667		0	13.3333	13.3333	13.3333
34.3	6.66667	13.3333	0	13.3333		0	13.3333	20	20
34.4125	6.66667	13.3333	0	20		0	13.3333	6.66667	6.66667
34.525	6.66667	6.66667	0	13.3333		0	13.3333	20	6.66667
34.6375	0	20	0	6.66667		0	20	20	13.3333
34.75	6.66667	20	0	13.3333		0	20	0	13.3333
34.8625	13.3333	6.66667	0	6.66667		0	13.3333	13.3333	13.3333
34.975	6.66667	6.66667	6.66667	20		0	13.3333	20	13.3333
35.0875	13.3333	20	6.66667	20		0	20	13.3333	13.3333
35.2	13.3333	13.3333	6.66667	6.66667		0	20	13.3333	20
35.3125	0	6.66667	6.66667	20		0	20	13.3333	13.3333
35.425	0	6.66667	0	13.3333		0	20	13.3333	6.66667
35.5375	6.66667	6.66667	0	13.3333		0	20	13.3333	20
35.65	13.3333	20	0	13.3333		0	20	20	13.3333
35.7625	6.66667	13.3333	0	13.3333		0	13.3333	13.3333	6.66667
35.875	0	0	0	20		0	20	6.66667	20
35.9875	6.66667	13.3333	0	6.66667		0	20	13.3333	13.3333
36.1	6.66667	20	0	20		0	20	13.3333	6.66667
36.2125	0	13.3333	6.66667	20		0	20	20	20
36.325	6.66667	13.3333	20	20		0	13.3333	20	20
36.4375	13.3333	13.3333	13.3333	20		0	20	13.3333	13.3333
36.55	6.66667	13.3333	0	20		0	20	13.3333	13.3333
36.6625	6.66667	13.3333	0	20		6.66667	26.6667	13.3333	13.3333
36.775	13.3333	20	0	13.3333		6.66667	20	13.3333	13.3333
36.8875	6.66667	20	0	20		0	26.6667	20	13.3333
37	6.66667	13.3333	6.66667	20		0	20	13.3333	20
37.1125	20	13.3333	13.3333	20		0	6.66667	13.3333	13.3333
37.225	26.6667	13.3333	6.66667	20		0	20	20	6.66667
37.3375	20	13.3333	0	13.3333		0	26.6667	20	20
37.45	6.66667	13.3333	6.66667	13.3333		0	13.3333	20	20
37.5625	6.66667	20	6.66667	13.3333		0	13.3333	13.3333	13.3333
37.675	20	20	6.66667	13.3333		0	26.6667	13.3333	13.3333
37.7875	13.3333	20	6.66667	20		0	20	20	20
37.9	0	20	6.66667	20		0	20	20	20
38.0125	20	20	6.66667	20		0	33.3333	20	20
38.125	26.6667	13.3333	0	20		0	20	13.3333	13.3333
38.2375	6.66667	13.3333	0	20		0	13.3333	6.66667	20
38.35	6.66667	20	6.66667	20		0	20	20	20
38.4625	6.66667	20	13.3333	13.3333		0	20	20	13.3333
38.575	6.66667	20	6.66667	20		0	33.3333	20	20
38.6875	20	13.3333	6.66667	20		6.66667	26.6667	20	20
38.8	13.3333	20	6.66667	26.6667		6.66667	26.6667	13.3333	20
38.9125	6.66667	20	6.66667	20		0	26.6667	13.3333	20
39.025	13.3333	13.3333	6.66667	20		0	20	20	20
39.1375	6.66667	20	0	26.6667		6.66667	26.6667	20	20
39.25	13.3333	20	6.66667	20		6.66667	33.3333	20	13.3333
39.3625	20	20	13.3333	26.6667		0	26.6667	20	20
39.475	6.66667	13.3333	13.3333	20		0	20	20	20
39.5875	6.66667	13.3333	6.66667	20		0	26.6667	20	20
39.7	6.66667	20	0	20		0	26.6667	13.3333	20
39.8125	6.66667	26.6667	0	20		0	26.6667	20	13.3333
39.925	13.3333	20	6.66667	20		0	26.6667	20	20
40.0375	20	20	13.3333	20		0	20	26.6667	20
40.15	20	20	13.3333	26.6667		0	26.6667	20	20
40.2625	6.66667	20	6.66667	20		0	20	20	20
40.375	0	13.3333	6.66667	26.6667		0	20	20	26.6667
40.4875	0	20	13.3333	20		0	33.3333	20	20
40.6	20	26.6667	6.66667	20		0	20	20	20
40.7125	20	20	0	26.6667		0	20	20	20
40.825	0	20	13.3333	20		0	20	26.6667	13.3333
40.9375	13.3333	13.3333	13.3333	20		0	26.6667	20	20
41.05	13.3333	26.6667	6.66667	26.6667		6.66667	33.3333	20	20
41.1625	6.66667	20	13.3333	26.6667		6.66667	20	20	20
41.275	20	20	6.66667	20		0	20	20	26.6667
41.3875	13.3333	20	0	20		0	33.3333	20	20
41.5	0	20	13.3333	26.6667		0	26.6667	20	20
41.6125	6.66667	33.3333	20	33.3333		0	20	20	20
41.725	20	20	6.66667	20		0	26.6667	20	20
41.8375	13.3333	20	0	26.6667		0	26.6667	20	20
41.95	0	20	6.66667	33.3333		6.66667	26.6667	26.6667	20
42.0625	13.3333	20	20	20		6.66667	33.3333	20	26.6667
42.175	20	20	13.3333	33.3333		0	33.3333	20	26.6667
42.2875	6.66667	20	6.66667	26.6667		0	26.6667	20	26.6667
42.4	6.66667	13.3333	13.3333	26.6667		0	20	20	20
42.5125	13.3333	20	13.3333	33.3333		0	26.6667	26.6667	26.6667
42.625	13.3333	26.6667	13.3333	26.6667		0	33.3333	26.6667	20
42.7375	13.3333	20	6.66667	26.6667		0	26.6667	20	20
42.85	6.66667	20	20	33.3333		0	33.3333	20	33.3333
42.9625	6.66667	20	20	26.6667		0	33.3333	20	26.6667
43.075	6.66667	33.3333	0	20		0	33.3333	20	20
43.1875	20	20	13.3333	33.3333		6.66667	33.3333	33.3333	26.6667
43.3	20	20	20	33.3333		6.66667	26.6667	33.3333	20
43.4125	0	20	6.66667	20		0	40	20	20
43.525	6.66667	20	6.66667	26.6667		0	40	20	33.3333
43.6375	6.66667	20	13.3333	33.3333		0	33.3333	26.6667	33.3333
43.75	13.3333	20	13.3333	26.6667		0	33.3333	33.3333	20
43.8625	20	20	13.3333	26.6667		0	33.3333	26.6667	20
43.975	6.66667	20	6.66667	26.6667		0	33.3333	20	26.6667
44.0875	6.66667	20	20	33.3333		6.66667	33.3333	26.6667	20
44.2	13.3333	20	20	33.3333		6.66667	40	20	20
44.3125	13.3333	40	0	20		0	33.3333	20	26.6667
44.425	13.3333	26.6667	6.66667	26.6667		0	20	26.6667	26.6667
44.5375	13.3333	20	20	40		0	26.6667	20	26.6667
44.65	6.66667	20	20	33.3333		0	40	26.6667	33.3333
44.7625	6.66667	26.6667	13.3333	20		6.66667	40	33.3333	20
44.875	20	26.6667	13.3333	26.6667		6.66667	40	20	20
44.9875	20	20	20	40		0	40	20	26.6667
45.1	6.66667	33.3333	13.3333	26.6667		0	20	26.6667	26.6667
45.2125	6.66667	33.3333	6.66667	20		0	20	33.3333	40
45.325	13.3333	26.6667	13.3333	40		0	40	26.6667	20
45.4375	13.3333	20	13.3333	40		0	40	20	20
45.55	6.66667	20	20	26.6667		0	33.3333	26.6667	33.3333
45.6625	13.3333	33.3333	13.3333	20		0	33.3333	26.6667	26.6667
45.775	13.3333	33.3333	13.3333	33.3333		0	33.3333	26.6667	26.6667
45.8875	6.66667	26.6667	20	40		0	33.3333	26.6667	20
46	13.3333	26.6667	20	33.3333		0	40	26.6667	26.6667
46.1125	13.3333	26.6667	13.3333	33.3333		6.66667	33.3333	26.6667	33.3333
46.225	13.3333	33.3333	13.3333	40		6.66667	33.3333	33.3333	20
46.3375	13.3333	26.6667	20	33.3333		0	33.3333	26.6667	26.6667
46.45	13.3333	20	20	26.6667		6.66667	33.3333	20	33.3333
46.5625	13.3333	33.3333	13.3333	26.6667		6.66667	33.3333	33.3333	20
46.675	13.3333	40	13.3333	33.3333		0	40	26.6667	26.6667
46.7875	13.3333	20	13.3333	40		0	40	20	33.3333
46.9	6.66667	20	20	40		0	33.3333	33.3333	26.6667
47.0125	13.3333	33.3333	20	33.3333		0	26.6667	26.6667	20
47.125	20	26.6667	20	26.6667		6.66667	33.3333	26.6667	26.6667
47.2375	20	33.3333	20	33.3333		6.66667	40	33.3333	33.3333
47.35	13.3333	26.6667	13.3333	40		0	40	20	20
47.4625	6.66667	26.6667	20	33.3333		0	33.3333	26.6667	26.6667
47.575	20	33.3333	13.3333	33.3333		0	33.3333	40	33.3333
47.6875	13.3333	26.6667	20	26.6667		0	33.3333	33.3333	26.6667
47.8	13.3333	33.3333	13.3333	26.6667		0	33.3333	20	33.3333
47.9125	20	40	20	40		6.66667	40	26.6667	26.6667
48.025	13.3333	26.6667	20	40		6.66667	33.3333	40	20
48.1375	13.3333	20	20	40		0	40	26.6667	33.3333
48.25	20	33.3333	26.6667	40		0	46.6667	20	40
48.3625	13.3333	40	20	26.6667		6.66667	40	26.6667	26.6667
48.475	13.3333	33.3333	20	26.6667		6.66667	40	33.3333	20
48.5875	20	33.3333	13.3333	40		0	33.3333	33.3333	26.6667
48.7	13.3333	33.3333	13.3333	40		0	33.3333	20	33.3333
48.8125	13.3333	33.3333	20	33.3333		6.66667	40	26.6667	40
48.925	13.3333	33.3333	20	26.6667		6.66667	33.3333	33.3333	33.3333
49.0375	13.3333	26.6667	20	33.3333		0	33.3333	33.3333	20
49.15	13.3333	33.3333	20	40		6.66667	46.6667	33.3333	26.6667
49.2625	20	40	20	40		13.3333	46.6667	26.6667	40
49.375	13.3333	40	13.3333	40		6.66667	40	26.6667	33.3333
49.4875	13.3333	40	20	33.3333		0	40	33.3333	26.6667
49.6	20	26.6667	26.6667	33.3333		0	33.3333	33.3333	33.3333
49.7125	6.66667	26.6667	20	40		0	33.3333	20	33.3333
49.825	20	40	20	40		6.66667	46.6667	26.6667	26.6667
49.9375	20	40	13.3333	40		6.66667	46.6667	33.3333	26.6667
50.05	6.66667	40	20	33.3333		0	40	33.3333	33.3333
50.1625	20	33.3333	20	26.6667		0	40	33.3333	33.3333
50.275	20	33.3333	20	33.3333		0	33.3333	26.6667	33.3333
50.3875	20	40	20	40		0	33.3333	33.3333	33.3333
50.5	20	40	26.6667	40		0	40	40	33.3333
50.6125	20	40	20	33.3333		6.66667	46.6667	33.3333	33.3333
50.725	13.3333	40	20	33.3333		6.66667	46.6667	20	33.3333
50.8375	6.66667	33.3333	26.6667	40		0	40	33.3333	40
50.95	20	33.3333	20	33.3333		6.66667	40	40	33.3333
51.0625	13.3333	40	26.6667	26.6667		6.66667	33.3333	40	20
51.175	20	40	26.6667	33.3333		0	33.3333	33.3333	26.6667
51.2875	20	40	20	40		0	40	26.6667	40
51.4	6.66667	40	20	40		0	33.3333	26.6667	40
51.5125	20	40	26.6667	40		6.66667	33.3333	33.3333	26.6667
51.625	20	40	20	40		13.3333	40	40	26.6667
51.7375	13.3333	40	26.6667	40		6.66667	40	33.3333	40
51.85	20	40	33.3333	40		0	40	33.3333	40
51.9625	13.3333	40	26.6667	40		0	40	33.3333	33.3333
52.075	13.3333	46.6667	20	40		0	40	33.3333	26.6667
52.1875	26.6667	46.6667	26.6667	40		0	40	33.3333	26.6667
52.3	13.3333	40	26.6667	33.3333		6.66667	40	26.6667	40
52.4125	13.3333	46.6667	26.6667	33.3333		6.66667	40	33.3333	40
52.525	20	46.6667	26.6667	40		0	33.3333	33.3333	33.3333
52.6375	6.66667	40	26.6667	40		0	40	33.3333	26.6667
52.75	13.3333	46.6667	26.6667	33.3333		0	40	40	33.3333
52.8625	20	46.6667	26.6667	33.3333		13.3333	40	40	40
52.975	20	40	26.6667	33.3333		13.3333	40	26.6667	33.3333
53.0875	20	40	26.6667	33.3333		0	33.3333	26.6667	33.3333
53.2	13.3333	40	26.6667	40		0	33.3333	40	33.3333
53.3125	13.3333	46.6667	26.6667	40		6.66667	40	40	33.3333
53.425	13.3333	46.6667	26.6667	40		6.66667	40	40	33.3333
53.5375	20	40	33.3333	40		6.66667	40	40	33.3333
53.65	13.3333	46.6667	40	40		6.66667	46.6667	40	33.3333
53.7625	20	53.3333	20	40		0	40	40	33.3333
53.875	20	40	20	40		13.3333	33.3333	26.6667	40
53.9875	6.66667	40	40	40		13.3333	40	20	40
54.1	26.6667	46.6667	33.3333	40		0	40	33.3333	40
54.2125	20	53.3333	26.6667	40		0	40	40	33.3333
54.325	13.3333	53.3333	26.6667	40		6.66667	40	40	33.3333
54.4375	20	46.6667	33.3333	40		6.66667	40	40	33.3333
54.55	20	40	26.6667	40		0	40	33.3333	26.6667
54.6625	13.3333	40	20	40		6.66667	33.3333	33.3333	33.3333
54.775	6.66667	46.6667	40	40		6.66667	40	40	40
54.8875	20	53.3333	33.3333	40		0	46.6667	40	33.3333
55	20	53.3333	26.6667	40		13.3333	40	33.3333	33.3333
55.1125	20	53.3333	26.6667	40		13.3333	40	33.3333	40
55.225	13.3333	46.6667	26.6667	40		6.66667	40	40	40
55.3375	0	40	33.3333	40		6.66667	40	33.3333	33.3333
55.45	20	53.3333	26.6667	33.3333		0	46.6667	33.3333	33.3333
55.5625	20	60	26.6667	33.3333		13.3333	46.6667	40	33.3333
55.675	13.3333	46.6667	33.3333	33.3333		13.3333	40	40	33.3333
55.7875	20	53.3333	33.3333	33.3333		0	40	40	40
55.9	20	53.3333	26.6667	40		13.3333	40	33.3333	40
56.0125	20	53.3333	20	40		13.3333	46.6667	26.6667	40
56.125	13.3333	53.3333	33.3333	40		0	40	33.3333	40
56.2375	13.3333	40	40	40		0	33.3333	40	40
56.35	20	53.3333	26.6667	40		6.66667	40	46.6667	33.3333
56.4625	6.66667	60	26.6667	40		20	40	46.6667	33.3333
56.575	20	53.3333	33.3333	40		13.3333	40	40	33.3333
56.6875	26.6667	53.3333	26.6667	40		0	40	33.3333	33.3333
56.8	6.66667	46.6667	26.6667	33.3333		6.66667	40	33.3333	40
56.9125	20	53.3333	33.3333	33.3333		13.3333	40	40	40
57.025	20	60	26.6667	33.3333		6.66667	40	40	40
57.1375	13.3333	46.6667	26.6667	33.3333		6.66667	40	40	33.3333
57.25	20	53.3333	40	40		13.3333	40	40	33.3333
57.3625	20	53.3333	20	40		6.66667	46.6667	40	40
57.475	20	53.3333	20	40		0	46.6667	40	40
57.5875	6.66667	53.3333	40	40		6.66667	40	40	40
57.7	13.3333	46.6667	40	40		13.3333	40	40	33.3333
57.8125	20	53.3333	26.6667	40		6.66667	40	40	33.3333
57.925	13.3333	60	20	40		6.66667	40	33.3333	40
58.0375	20	53.3333	33.3333	40		13.3333	40	33.3333	40
58.15	20	46.6667	40	40		13.3333	40	40	40
58.2625	13.3333	53.3333	26.6667	40		6.66667	40	33.3333	40
58.375	13.3333	53.3333	26.6667	40		0	46.6667	33.3333	46.6667
58.4875	20	53.3333	33.3333	40		6.66667	46.6667	40	46.6667
58.6	20	53.3333	33.3333	40		6.66667	40	40	40
58.7125	13.3333	46.6667	33.3333	40		6.66667	40	40	40
58.825	20	53.3333	26.6667	40		6.66667	40	40	40
58.9375	20	53.3333	33.3333	40		0	40	40	40
59.05	13.3333	53.3333	33.3333	40		6.66667	46.6667	40	40
59.1625	13.3333	60	33.3333	40		13.3333	53.3333	40	33.3333
59.275	20	46.6667	26.6667	40		6.66667	46.6667	40	40
59.3875	20	53.3333	26.6667	40		0	40	40	33.3333
59.5	20	60	40	53.3333		6.66667	40	33.3333	33.3333
59.6125	26.6667	46.6667	26.6667	46.6667		6.66667	33.3333	40	40
59.725	20	53.3333	26.6667	33.3333		13.3333	40	46.6667	40
59.8375	13.3333	60	40	40		13.3333	40	40	40
59.95	26.6667	60	33.3333	40		13.3333	33.3333	40	40
60.0625	20	53.3333	26.6667	40		6.66667	26.6667	40	46.6667
60.175	13.3333	46.6667	26.6667	40		0	26.6667	40	46.6667
60.2875	20	60	26.6667	40		6.66667	40	40	46.6667
60.4	13.3333	53.3333	33.3333	40		13.3333	40	40	40
60.5125	13.3333	53.3333	33.3333	40		6.66667	40	40	40
60.625	13.3333	60	33.3333	40		6.66667	40	40	40
60.7375	20	46.6667	33.3333	40		20	40	40	40
60.85	13.3333	53.3333	33.3333	40		13.3333	46.6667	40	40
60.9625	20	60	40	40		0	33.3333	40	40
61.075	26.6667	60	33.3333	40		6.66667	33.3333	40	40
61.1875	20	53.3333	33.3333	40		6.66667	40	40	40
61.3	33.3333	46.6667	26.6667	40		13.3333	46.6667	40	40
61.4125	26.6667	60	26.6667	40		13.3333	53.3333	46.6667	40
61.525	26.6667	53.3333	40	40		6.66667	46.6667	46.6667	40
61.6375	26.6667	53.3333	33.3333	40		6.66667	40	40	40
61.75	20	60	20	33.3333		6.66667	40	46.6667	40
61.8625	33.3333	53.3333	26.6667	33.3333		6.66667	40	40	40
61.975	26.6667	53.3333	33.3333	40		13.3333	40	40	46.6667
62.0875	26.6667	53.3333	33.3333	53.3333		13.3333	46.6667	46.6667	46.6667
62.2	26.6667	60	40	53.3333		6.66667	46.6667	40	40
62.3125	20	53.3333	33.3333	40		6.66667	40	40	40
62.425	26.6667	46.6667	26.6667	40		0	46.6667	40	40
62.5375	26.6667	60	26.6667	40		0	46.6667	40	40
62.65	20	53.3333	33.3333	33.3333		13.3333	40	40	40
62.7625	26.6667	60	33.3333	33.3333		20	40	40	40
62.875	20	60	26.6667	40		6.66667	46.6667	40	40
62.9875	20	46.6667	33.3333	46.6667		6.66667	53.3333	40	40
63.1	26.6667	60	40	46.6667		6.66667	53.3333	40	46.6667
63.2125	20	53.3333	40	40		6.66667	46.6667	46.6667	46.6667
63.325	20	60	26.6667	40		6.66667	46.6667	46.6667	40
63.4375	20	60	20	40		13.3333	46.6667	40	40
63.55	20	40	33.3333	40		13.3333	40	46.6667	46.6667
63.6625	26.6667	53.3333	40	46.6667		6.66667	40	46.6667	53.3333
63.775	20	60	33.3333	40		20	40	40	53.3333
63.8875	13.3333	53.3333	20	33.3333		13.3333	40	46.6667	40
64	26.6667	60	26.6667	40		0	40	46.6667	40
64.1125	20	60	40	46.6667		13.3333	46.6667	40	40
64.225	20	46.6667	40	46.6667		13.3333	53.3333	40	40
64.3375	20	53.3333	26.6667	40		6.66667	53.3333	40	46.6667
64.45	20	60	20	40		6.66667	46.6667	40	46.6667
64.5625	20	53.3333	33.3333	40		6.66667	40	46.6667	40
64.675	13.3333	60	40	40		13.3333	40	46.6667	40
64.7875	20	60	26.6667	40		6.66667	40	46.6667	46.6667
64.9	20	46.6667	26.6667	40		6.66667	46.6667	46.6667	46.6667
65.0125	20	53.3333	33.3333	40		13.3333	53.3333	40	40
65.125	33.3333	60	33.3333	46.6667		6.66667	46.6667	40	40
65.2375	20	60	33.3333	46.6667		6.66667	46.6667	46.6667	46.6667
65.35	13.3333	53.3333	33.3333	46.6667		6.66667	46.6667	46.6667	46.6667
65.4625	20	53.3333	40	46.6667		13.3333	40	46.6667	46.6667
65.575	20	53.3333	33.3333	33.3333		13.3333	40	46.6667	40
65.6875	20	53.3333	20	33.3333		0	40	40	40
65.8	20	53.3333	26.6667	40		6.66667	40	46.6667	40
65.9125	20	60	40	40		20	46.6667	46.6667	40
66.025	20	53.3333	40	40		13.3333	53.3333	46.6667	46.6667
66.1375	20	53.3333	33.3333	40		13.3333	46.6667	53.3333	46.6667
66.25	20	60	26.6667	40		13.3333	46.6667	46.6667	46.6667
66.3625	20	53.3333	26.6667	40		6.66667	46.6667	40	46.6667
66.475	13.3333	46.6667	26.6667	46.6667		6.66667	40	40	40
66.5875	20	60	33.3333	46.6667		6.66667	40	46.6667	40
66.7	26.6667	53.3333	40	46.6667		13.3333	40	53.3333	46.6667
66.8125	20	46.6667	40	46.6667		13.3333	40	46.6667	46.6667
66.925	20	53.3333	20	40		6.66667	40	40	40
67.0375	26.6667	53.3333	20	40		6.66667	46.6667	46.6667	46.6667
67.15	20	53.3333	40	33.3333		20	46.6667	46.6667	46.6667
67.2625	20	60	40	40		13.3333	40	46.6667	46.6667
67.375	26.6667	53.3333	20	46.6667		0	46.6667	46.6667	46.6667
67.4875	20	53.3333	20	40		6.66667	53.3333	53.3333	40
67.6	20	60	40	40		20	46.6667	53.3333	40
67.7125	26.6667	53.3333	26.6667	40		13.3333	40	46.6667	40
67.825	20	60	20	40		0	40	40	46.6667
67.9375	20	60	33.3333	46.6667		0	40	40	46.6667
68.05	20	40	40	46.6667		6.66667	40	40	40
68.1625	26.6667	60	33.3333	40		20	40	53.3333	46.6667
68.275	26.6667	60	26.6667	40		13.3333	40	53.3333	53.3333
68.3875	20	53.3333	33.3333	40		0	46.6667	46.6667	46.6667
68.5	33.3333	60	40	46.6667		13.3333	46.6667	46.6667	46.6667
68.6125	20	46.6667	26.6667	46.6667		20	40	40	46.6667
68.725	20	53.3333	33.3333	40		6.66667	40	46.6667	40
68.8375	20	60	33.3333	40		0	46.6667	46.6667	40
68.95	20	53.3333	33.3333	40		20	46.6667	40	46.6667
69.0625	26.6667	46.6667	33.3333	46.6667		20	40	53.3333	46.6667
69.175	20	60	26.6667	40		0	40	53.3333	53.3333
69.2875	20	53.3333	26.6667	33.3333		0	40	40	53.3333
69.4	20	53.3333	26.6667	40		6.66667	46.6667	46.6667	40
69.5125	20	60	33.3333	46.6667		13.3333	46.6667	46.6667	46.6667
69.625	20	46.6667	40	46.6667		6.66667	46.6667	40	46.6667
69.7375	20	53.3333	33.3333	46.6667		6.66667	46.6667	40	46.6667
69.85	26.6667	60	26.6667	46.6667		13.3333	46.6667	53.3333	46.6667
69.9625	20	46.6667	26.6667	40		6.66667	46.6667	60	40
70.075	20	46.6667	33.3333	40		6.66667	40	46.6667	40
70.1875	26.6667	60	40	46.6667		6.66667	40	40	60
70.3	20	53.3333	26.6667	46.6667		13.3333	40	53.3333	60
70.4125	20	46.6667	26.6667	40		20	40	53.3333	40
70.525	20	53.3333	33.3333	40		6.66667	40	40	40
70.6375	20	53.3333	33.3333	40		0	40	40	46.6667
70.75	20	60	40	46.6667		0	46.6667	40	60
70.8625	20	53.3333	40	53.3333		20	46.6667	46.6667	53.3333
70.975	20	46.6667	33.3333	40		20	46.6667	60	40
71.0875	20	53.3333	26.6667	33.3333		0	46.6667	53.3333	40
71.2	20	53.3333	26.6667	46.6667		6.66667	40	40	46.6667
71.3125	20	46.6667	33.3333	46.6667		20	46.6667	40	53.3333
71.425	20	46.6667	40	40		13.3333	46.6667	46.6667	53.3333
71.5375	20	53.3333	33.3333	40		0	46.6667	53.3333	46.6667
71.65	20	60	33.3333	40		6.66667	46.6667	46.6667	40
71.7625	26.6667	53.3333	33.3333	46.6667		13.3333	53.3333	53.3333	53.3333
71.875	20	46.6667	33.3333	46.6667		6.66667	53.3333	46.6667	53.3333
71.9875	26.6667	46.6667	33.3333	46.6667		6.66667	40	40	53.3333
72.1	20	53.3333	26.6667	46.6667		20	40	40	46.6667
72.2125	20	53.3333	33.3333	33.3333		13.3333	40	60	53.3333
72.325	20	53.3333	40	33.3333		0	46.6667	60	53.3333
72.4375	20	46.6667	40	46.6667		6.66667	53.3333	40	40
72.55	26.6667	53.3333	20	46.6667		13.3333	53.3333	46.6667	46.6667
72.6625	20	53.3333	20	40		6.66667	46.6667	46.6667	46.6667
72.775	20	53.3333	40	46.6667		6.66667	40	46.6667	53.3333
72.8875	20	46.6667	40	46.6667		13.3333	46.6667	53.3333	53.3333
73	26.6667	46.6667	40	40		13.3333	46.6667	53.3333	40
73.1125	26.6667	60	26.6667	40		6.66667	40	46.6667	46.6667
73.225	20	53.3333	20	40		6.66667	53.3333	46.6667	53.3333
73.3375	20	46.6667	33.3333	46.6667		20	60	53.3333	53.3333
73.45	20	46.6667	40	53.3333		13.3333	53.3333	46.6667	46.6667
73.5625	26.6667	40	40	46.6667		6.66667	40	53.3333	40
73.675	20	46.6667	40	40		13.3333	40	60	53.3333
73.7875	20	60	40	40		6.66667	46.6667	46.6667	60
73.9	20	60	26.6667	46.6667		0	53.3333	40	46.6667
74.0125	20	46.6667	26.6667	46.6667		13.3333	53.3333	60	46.6667
74.125	33.3333	46.6667	33.3333	46.6667		13.3333	40	60	46.6667
74.2375	20	53.3333	33.3333	46.6667		6.66667	40	46.6667	46.6667
74.35	26.6667	53.3333	40	46.6667		6.66667	46.6667	40	53.3333
74.4625	20	46.6667	40	46.6667		13.3333	53.3333	60	53.3333
74.575	20	40	33.3333	40		13.3333	53.3333	60	46.6667
74.6875	26.6667	60	33.3333	40		0	46.6667	40	40
74.8	20	60	33.3333	53.3333		13.3333	46.6667	46.6667	53.3333
74.9125	26.6667	46.6667	26.6667	60		13.3333	40	60	60
75.025	20	46.6667	33.3333	46.6667		6.66667	53.3333	60	46.6667
75.1375	20	53.3333	40	40		13.3333	60	46.6667	40
75.25	26.6667	60	40	46.6667		6.66667	46.6667	53.3333	53.3333
75.3625	20	46.6667	40	46.6667		6.66667	40	60	60
75.475	20	46.6667	33.3333	53.3333		13.3333	46.6667	53.3333	46.6667
75.5875	20	53.3333	33.3333	46.6667		13.3333	53.3333	46.6667	53.3333
75.7	13.3333	53.3333	40	46.6667		6.66667	53.3333	60	53.3333
75.8125	26.6667	53.3333	26.6667	46.6667		6.66667	53.3333	53.3333	40
75.925	33.3333	53.3333	26.6667	46.6667		20	46.6667	40	60
76.0375	20	53.3333	40	46.6667		20	46.6667	46.6667	60
76.15	20	46.6667	40	46.6667		13.3333	46.6667	60	40
76.2625	20	46.6667	40	46.6667		6.66667	46.6667	53.3333	46.6667
76.375	20	53.3333	40	40		13.3333	46.6667	46.6667	60
76.4875	20	53.3333	40	53.3333		13.3333	53.3333	60	53.3333
76.6	26.6667	53.3333	26.6667	60		0	60	53.3333	40
76.7125	33.3333	53.3333	26.6667	46.6667		13.3333	46.6667	46.6667	53.3333
76.825	20	46.6667	33.3333	46.6667		13.3333	46.6667	53.3333	60
76.9375	20	46.6667	33.3333	46.6667		13.3333	53.3333	53.3333	53.3333
77.05	20	53.3333	40	46.6667		13.3333	53.3333	53.3333	53.3333
77.1625	13.3333	46.6667	40	53.3333		6.66667	53.3333	53.3333	46.6667
77.275	20	60	33.3333	46.6667		6.66667	46.6667	46.6667	53.3333
77.3875	26.6667	60	26.6667	40		6.66667	40	53.3333	60
77.5	26.6667	46.6667	33.3333	53.3333		20	53.3333	60	46.6667
77.6125	20	46.6667	40	53.3333		13.3333	53.3333	46.6667	46.6667
77.725	20	53.3333	40	46.6667		6.66667	40	46.6667	60
77.8375	26.6667	60	40	46.6667		13.3333	60	60	53.3333
77.95	20	53.3333	33.3333	53.3333		13.3333	60	60	53.3333
78.0625	26.6667	53.3333	20	60		6.66667	46.6667	46.6667	60
78.175	20	46.6667	26.6667	46.6667		13.3333	46.6667	53.3333	46.6667
78.2875	20	53.3333	40	40		13.3333	53.3333	66.6667	53.3333
78.4	20	60	40	53.3333		13.3333	53.3333	53.3333	53.3333
78.5125	20	46.6667	40	53.3333		20	46.6667	53.3333	46.6667
78.625	33.3333	46.6667	40	40		6.66667	46.6667	53.3333	60
78.7375	20	53.3333	40	40		0	46.6667	60	53.3333
78.85	20	60	33.3333	46.6667		20	53.3333	60	46.6667
78.9625	26.6667	53.3333	33.3333	60		20	46.6667	53.3333	60
79.075	20	46.6667	40	53.3333		0	46.6667	53.3333	60
79.1875	26.6667	53.3333	33.3333	46.6667		13.3333	53.3333	46.6667	46.6667
79.3	26.6667	46.6667	33.3333	46.6667		20	53.3333	60	46.6667
79.4125	20	40	40	46.6667		6.66667	53.3333	60	53.3333
79.525	20	60	40	46.6667		20	46.6667	53.3333	60
79.6375	20	60	33.3333	46.6667		20	53.3333	60	46.6667
79.75	33.3333	46.6667	33.3333	46.6667		0	53.3333	60	53.3333
79.8625	26.6667	53.3333	33.3333	40		20	40	53.3333	60
79.975	20	46.6667	40	60		20	46.6667	40	53.3333
80.0875	20	60	33.3333	60		6.66667	53.3333	60	46.6667
80.2	20	60	33.3333	40		6.66667	46.6667	60	53.3333
80.3125	26.6667	46.6667	40	46.6667		20	46.6667	46.6667	60
80.425	26.6667	46.6667	40	46.6667		20	53.3333	60	46.6667
80.5375	26.6667	46.6667	40	46.6667		13.3333	53.3333	60	60
80.65	26.6667	53.3333	40	60		6.66667	46.6667	60	60
80.7625	26.6667	53.3333	26.6667	53.3333		13.3333	46.6667	60	53.3333
80.875	20	53.3333	26.6667	46.6667		20	53.3333	46.6667	60
80.9875	20	60	40	53.3333		6.66667	46.6667	53.3333	53.3333
81.1	26.6667	53.3333	40	46.6667		6.66667	40	53.3333	46.6667
81.2125	26.6667	60	40	46.6667		20	53.3333	53.3333	53.3333
81.325	20	60	40	53.3333		13.3333	60	60	60
81.4375	20	46.6667	40	46.6667		6.66667	46.6667	53.3333	53.3333
81.55	26.6667	53.3333	40	46.6667		20	40	53.3333	53.3333
81.6625	26.6667	53.3333	40	53.3333		13.3333	53.3333	60	46.6667
81.775	20	53.3333	40	60		6.66667	53.3333	60	53.3333
81.8875	20	53.3333	33.3333	53.3333		6.66667	40	46.6667	60
82	26.6667	53.3333	26.6667	46.6667		6.66667	53.3333	53.3333	53.3333
82.1125	26.6667	53.3333	33.3333	46.6667		20	53.3333	60	53.3333
82.225	20	53.3333	40	46.6667		13.3333	40	53.3333	53.3333
82.3375	26.6667	53.3333	40	53.3333		13.3333	53.3333	53.3333	53.3333
82.45	26.6667	53.3333	40	46.6667		13.3333	60	60	53.3333
82.5625	20	53.3333	40	53.3333		0	53.3333	60	53.3333
82.675	26.6667	53.3333	40	60		13.3333	53.3333	53.3333	53.3333
82.7875	20	60	40	46.6667		13.3333	53.3333	53.3333	60
82.9	26.6667	60	40	46.6667		6.66667	53.3333	60	53.3333
83.0125	33.3333	53.3333	40	53.3333		20	53.3333	53.3333	53.3333
83.125	20	53.3333	26.6667	53.3333		13.3333	53.3333	53.3333	53.3333
83.2375	33.3333	53.3333	26.6667	46.6667		6.66667	53.3333	60	46.6667
83.35	33.3333	53.3333	40	53.3333		13.3333	46.6667	53.3333	60
83.4625	20	53.3333	40	60		20	46.6667	60	53.3333
83.575	26.6667	53.3333	40	46.6667		13.3333	60	60	53.3333
83.6875	26.6667	60	40	40		6.66667	60	53.3333	60
83.8	26.6667	60	40	53.3333		13.3333	46.6667	46.6667	53.3333
83.9125	33.3333	53.3333	40	53.3333		13.3333	46.6667	60	53.3333
84.025	20	53.3333	40	40		13.3333	60	66.6667	53.3333
84.1375	26.6667	53.3333	33.3333	53.3333		13.3333	53.3333	53.3333	53.3333
84.25	33.3333	53.3333	33.3333	60		6.66667	53.3333	60	53.3333
84.3625	20	60	40	46.6667		20	53.3333	60	53.3333
84.475	26.6667	60	40	46.6667		20	53.3333	53.3333	53.3333
84.5875	33.3333	46.6667	40	53.3333		6.66667	60	60	53.3333
84.7	26.6667	53.3333	40	60		20	53.3333	53.3333	60
84.8125	26.6667	60	26.6667	53.3333		20	60	53.3333	53.3333
84.925	20	46.6667	26.6667	53.3333		6.66667	60	60	46.6667
85.0375	26.6667	53.3333	40	53.3333		20	46.6667	60	60
85.15	33.3333	60	40	40		20	60	60	60
85.2625	26.6667	53.3333	40	60		6.66667	60	60	53.3333
85.375	26.6667	53.3333	40	60		20	53.3333	53.3333	53.3333
85.4875	26.6667	53.3333	40	46.6667		13.3333	60	60	60
85.6	20	60	40	53.3333		6.66667	53.3333	66.6667	60
85.7125	20	53.3333	40	53.3333		6.66667	53.3333	60	60
85.825	33.3333	53.3333	40	53.3333		13.3333	53.3333	60	53.3333
85.9375	26.6667	60	40	46.6667		20	53.3333	66.6667	53.3333
86.05	20	53.3333	33.3333	53.3333		6.66667	53.3333	60	60
86.1625	33.3333	53.3333	33.3333	60		13.3333	53.3333	60	53.3333
86.275	26.6667	53.3333	40	53.3333		20	53.3333	53.3333	60
86.3875	20	53.3333	40	46.6667		6.66667	60	53.3333	60
86.5	26.6667	60	33.3333	53.3333		13.3333	60	66.6667	53.3333
86.6125	26.6667	53.3333	33.3333	60		20	46.6667	66.6667	53.3333
86.725	26.6667	60	40	60		13.3333	46.6667	60	60
86.8375	26.6667	60	40	53.3333		6.66667	60	60	60
86.95	26.6667	46.6667	40	53.3333		13.3333	53.3333	60	60
87.0625	26.6667	53.3333	40	60		13.3333	53.3333	66.6667	53.3333
87.175	26.6667	66.6667	40	53.3333		13.3333	53.3333	60	60
87.2875	26.6667	53.3333	40	60		20	46.6667	60	60
87.4	26.6667	53.3333	40	60		6.66667	60	66.6667	60
87.5125	33.3333	53.3333	40	46.6667		13.3333	53.3333	60	60
87.625	26.6667	40	40	53.3333		20	53.3333	66.6667	53.3333
87.7375	26.6667	60	40	60		13.3333	53.3333	60	60
87.85	33.3333	60	40	53.3333		20	53.3333	60	53.3333
87.9625	33.3333	53.3333	40	53.3333		13.3333	60	60	53.3333
88.075	26.6667	53.3333	40	53.3333		20	53.3333	60	60
88.1875	26.6667	53.3333	40	53.3333		20	53.3333	60	53.3333
88.3	33.3333	60	40	60		0	53.3333	60	66.6667
88.4125	20	53.3333	40	53.3333		20	60	73.3333	60
88.525	26.6667	53.3333	40	53.3333		20	53.3333	60	53.3333
88.6375	33.3333	53.3333	40	60		0	40	60	60
88.75	26.6667	53.3333	40	53.3333		6.66667	60	66.6667	53.3333
88.8625	26.6667	53.3333	40	46.6667		20	60	60	60
88.975	26.6667	53.3333	40	60		13.3333	46.6667	60	53.3333
89.0875	20	53.3333	40	60		13.3333	60	60	60
89.2	26.6667	53.3333	40	53.3333		13.3333	60	60	60
89.3125	40	53.3333	40	60		13.3333	53.3333	53.3333	60
89.425	20	46.6667	40	60		20	53.3333	66.6667	60
89.5375	20	60	40	53.3333		6.66667	60	60	46.6667
89.65	33.3333	60	40	46.6667		13.3333	60	53.3333	60
89.7625	20	40	40	60		20	46.6667	66.6667	60
89.875	26.6667	53.3333	40	60		6.66667	53.3333	66.6667	60
89.9875	33.3333	60	40	53.3333		6.66667	53.3333	60	53.3333
90.1	33.3333	53.3333	40	60		20	53.3333	60	53.3333
90.2125	20	60	40	53.3333		20	60	60	60
90.325	20	60	40	53.3333		6.66667	53.3333	60	60
90.4375	33.3333	53.3333	40	60		0	60	66.6667	60
90.55	20	60	40	53.3333		20	53.3333	60	60
90.6625	26.6667	60	40	60		20	60	66.6667	60
90.775	40	46.6667	40	60		6.66667	53.3333	66.6667	66.6667
90.8875	33.3333	60	40	60		20	53.3333	60	60
91	20	66.6667	46.6667	53.3333		13.3333	60	66.6667	46.6667
91.1125	26.6667	46.6667	46.6667	53.3333		6.66667	53.3333	60	53.3333
91.225	33.3333	60	33.3333	60		20	60	60	60
91.3375	33.3333	60	33.3333	53.3333		20	60	66.6667	53.3333
91.45	20	53.3333	40	60		6.66667	46.6667	60	60
91.5625	20	53.3333	46.6667	60		13.3333	60	60	60
91.675	40	53.3333	53.3333	53.3333		20	60	66.6667	60
91.7875	26.6667	53.3333	46.6667	60		13.3333	40	60	53.3333
91.9	26.6667	53.3333	33.3333	53.3333		13.3333	60	60	53.3333
92.0125	33.3333	60	33.3333	66.6667		13.3333	60	66.6667	60
92.125	33.3333	46.6667	40	60		13.3333	53.3333	60	53.3333
92.2375	26.6667	60	46.6667	53.3333		13.3333	60	53.3333	60
92.35	26.6667	60	53.3333	53.3333		13.3333	46.6667	66.6667	53.3333
92.4625	33.3333	46.6667	46.6667	53.3333		13.3333	60	73.3333	60
92.575	26.6667	60	40	60		13.3333	60	60	60
92.6875	26.6667	60	40	60		13.3333	46.6667	60	60
92.8	33.3333	46.6667	40	60		13.3333	60	66.6667	60
92.9125	26.6667	60	40	53.3333		13.3333	53.3333	60	46.6667
93.025	26.6667	66.6667	40	60		20	53.3333	60	60
93.1375	40	46.6667	46.6667	60		13.3333	60	66.6667	60
93.25	33.3333	53.3333	46.6667	60		13.3333	66.6667	60	60
93.3625	26.6667	60	40	60		20	60	60	60
93.475	26.6667	53.3333	40	60		6.66667	53.3333	60	60
93.5875	26.6667	53.3333	40	60		20	60	66.6667	60
93.7	33.3333	53.3333	40	53.3333		20	60	66.6667	60
93.8125	33.3333	53.3333	40	60		6.66667	46.6667	60	60
93.925	26.6667	53.3333	53.3333	60		20	60	60	53.3333
94.0375	26.6667	53.3333	53.3333	60		20	60	66.6667	60
94.15	26.6667	60	46.6667	60		13.3333	60	60	60
94.2625	33.3333	60	46.6667	60		20	66.6667	60	53.3333
94.375	33.3333	46.6667	40	60		13.3333	60	66.6667	53.3333
94.4875	26.6667	60	40	60		13.3333	53.3333	60	60
94.6	26.6667	60	40	66.6667		13.3333	60	66.6667	60
94.7125	33.3333	53.3333	40	60		13.3333	60	66.6667	53.3333
94.825	33.3333	60	40	60		20	53.3333	66.6667	60
94.9375	20	46.6667	46.6667	60		6.66667	60	60	60
95.05	26.6667	53.3333	46.6667	60		13.3333	60	60	60
95.1625	40	60	40	53.3333		20	60	66.6667	60
95.275	40	53.3333	46.6667	53.3333		6.66667	53.3333	60	53.3333
95.3875	33.3333	60	46.6667	66.6667		20	60	66.6667	66.6667
95.5	26.6667	60	40	53.3333		20	60	60	60
95.6125	26.6667	60	40	60		6.66667	60	60	60
95.725	33.3333	53.3333	40	60		20	60	60	60
95.8375	33.3333	60	46.6667	60		13.3333	60	60	60
95.95	26.6667	60	53.3333	66.6667		20	60	66.6667	60
96.0625	26.6667	53.3333	46.6667	60		20	53.3333	60	53.3333
96.175	33.3333	60	40	60		6.66667	60	60	60
96.2875	40	53.3333	46.6667	60		20	60	66.6667	53.3333
96.4	26.6667	60	46.6667	60		20	53.3333	66.6667	60
96.5125	20	53.3333	40	60		13.3333	66.6667	60	60
96.625	33.3333	53.3333	40	66.6667		13.3333	60	73.3333	53.3333
96.7375	40	60	40	53.3333		13.3333	53.3333	60	60
96.85	26.6667	60	40	60		20	60	53.3333	60
96.9625	20	60	46.6667	66.6667		20	60	66.6667	60
97.075	33.3333	53.3333	46.6667	60		13.3333	53.3333	60	66.6667
97.1875	33.3333	60	46.6667	60		20	53.3333	60	60
97.3	33.3333	60	40	53.3333		13.3333	66.6667	73.3333	60
97.4125	40	60	46.6667	60		13.3333	53.3333	66.6667	53.3333
97.525	26.6667	60	46.6667	66.6667		20	60	60	60
97.6375	20	53.3333	40	66.6667		20	66.6667	66.6667	60
97.75	33.3333	60	40	60		20	60	60	60
97.8625	33.3333	60	46.6667	60		13.3333	60	60	60
97.975	33.3333	66.6667	46.6667	66.6667		20	53.3333	60	60
98.0875	33.3333	60	40	66.6667		13.3333	60	60	60
98.2	26.6667	53.3333	40	60		13.3333	60	66.6667	60
98.3125	26.6667	60	40	66.6667		20	60	66.6667	66.6667
98.425	33.3333	53.3333	46.6667	60		13.3333	60	66.6667	53.3333
98.5375	40	60	53.3333	60		20	53.3333	60	60
98.65	33.3333	60	46.6667	60		13.3333	53.3333	66.6667	60
98.7625	26.6667	60	40	53.3333		20	60	66.6667	60
98.875	33.3333	60	40	66.6667		20	60	60	60
98.9875	33.3333	60	40	66.6667		20	53.3333	66.6667	60
99.1	33.3333	60	46.6667	66.6667		20	60	66.6667	60
99.2125	33.3333	46.6667	46.6667	60		20	60	66.6667	60
99.325	26.6667	66.6667	53.3333	60		20	53.3333	60	60
99.4375	33.3333	66.6667	53.3333	60		13.3333	60	66.6667	53.3333
99.55	40	60	40	60		20	60	66.6667	60
99.6625	26.6667	60	40	66.6667		13.3333	60	60	60
99.775	26.6667	53.3333	40	66.6667		20	60	60	60
99.8875	40	60	40	66.6667		20	53.3333	60	60
100	20	33.3333	20	33.3333		6.66667	26.6667	33.3333	26.6667
0	0	0	0	0		0	0	0	0
0	0	0	0	0		0	0	0	0
0	0	0	0	0		0	0	0	0
0	0	0	0	0		0	0	0	0
0	0	0	0	0		0	0	0	0
0	0	0	0	0		0	0	0	0
0	0	0	0	0		0	0	0	0
0	0	0	0	0		0	0	0	0
0	0	0	0	0		0	0	0	0
0	0	0	0	0		0	0	0	0
0	0	0	0	0		0	0	0	0
0	0	0	0	0		0	0	0	0
0	0	0	0	0		0	0	0	0
0	0	0	0	0		0	0	0	0
0	0	0	0	0		0	0	0	0
0	0	0	0	0		0	0	0	0
0	0	0	0	0		0	0	0	0
0	0	0	0	0		0	0	0	0
0	0	0	0	0		0	0	0	0
0	0	0	0	0		0	0	0	0
DL5 PN, uEPSC (pA)
exposure cond.	solvent								E2-hexenal
n	7								5
time (ms)	I (pA)								I (pA)
0	0.128375	-0.517519	0.747675	-0.444786	1.26923	0.0440543	1.4881		0.542327	-0.30827	0.763447	0.210788	-0.315563
0.100001	0.228542	-0.689234	0.876461	-0.283803	1.01166	-0.471091	1.47522		0.671114	-0.617357	0.997604	0.365331	-0.104822
0.200002	0.3144	-0.753627	0.812068	-0.476983	0.882875	-0.406698	1.74567		1.05747	-0.617357	1.04444	0.159273	-0.151653
0.300003	0.328709	-0.517519	1.03744	-0.316	0.625303	0.301627	1.64264		1.12187	-0.771901	0.728324	0.0820017	-0.186777
0.400004	0.471805	-0.259946	0.973051	-0.251607	-0.0186286	0.430413	1.01159		0.735507	-1.08099	0.470751	0.0691231	-0.198485
0.500005	0.199923	-0.0667666	1.03744	0.134752	-0.46938	0.301627	1.17901		0.928686	-1.26129	0.6932	0.0691231	-0.584843
0.600006	0.128375	-0.0453022	0.973051	0.070359	-0.598167	0.494806	1.01159		0.220362	-1.05523	0.330257	-0.0339059	-0.760461
0.700007	0.0997558	0.104948	1.03744	0.327932	-0.404987	0.623592	0.805528		0.0915755	-1.1325	0.295134	0.365331	-0.842416
0.800008	0.128375	0.190806	1.10184	0.134752	-0.147415	0.172841	0.766893		0.477934	-0.977959	0.576122	0.365331	-0.666798
0.900009	0.0854463	0.40545	1.10184	0.0059659	0.496516	0.0440543	1.08886		0.349148	-0.823415	0.658077	0.339574	-0.842416
1.00001	-0.000411251	0.577165	1.06964	-0.380393	0.754089	-0.0203388	1.14037		0.349148	-0.462814	0.599537	0.159273	-0.479473
1.10001	0.0997558	0.491307	0.973051	-0.251607	1.20484	0.108447	1.44946		0.735507	-0.359785	0.775155	0.37821	-0.526304
1.20001	0.0138983	0.255199	0.683282	-0.444786	1.33363	-0.342304	1.4881		0.864293	-0.411299	0.810279	0.185031	-0.479473
1.30001	-0.100578	0.491307	0.393513	-0.573572	0.625303	-0.277911	1.46234		0.349148	-0.900687	0.728324	0.185031	-0.643383
1.40001	-0.04334	0.233735	0.168137	-0.476983	0.432123	-0.213518	1.61688		0.349148	-0.952201	0.751739	0.313817	-0.655091
1.50002	0.0854463	0.276663	0.200333	-0.251607	0.496516	0.237234	1.50097		0.671114	-0.694629	0.786863	0.532754	-0.701922
1.60002	-0.215055	0.383985	0.0715471	-0.155017	0.496516	0.301627	1.53961		0.0271824	-0.771901	1.03273	0.300938	-0.690214
1.70002	-0.100578	0.512772	0.13594	0.0381625	-0.0830217	0.237234	1.4881		0.284755	-1.02947	1.02102	0.236545	-0.71363
1.80002	-0.0862688	0.147877	0.522299	0.327932	0.754089	0.559199	1.64264		0.284755	-0.952201	1.02102	0.455482	-0.71363
1.90002	-0.04334	0.233735	1.10184	0.0059659	0.496516	0.687986	1.50097		0.671114	-1.02947	1.00931	0.674418	-0.737045
2.00002	-0.343841	0.21227	0.940854	-0.0262307	0.496516	0.430413	1.55249		0.155969	-1.39007	0.985896	1.06078	-0.889247
2.10002	-0.0576496	0.104948	0.618889	-0.12282	1.01166	0.301627	1.23052		1.12187	-1.85371	0.868818	1.09941	-0.819
2.20002	-0.172126	0.147877	0.618889	0.0381625	1.14045	0.494806	1.20477		0.220362	-1.95673	0.798571	1.13805	-0.819
2.30002	-0.186436	0.491307	0.490102	0.102556	0.818482	0.430413	1.05022		0.671114	-1.28705	0.974188	0.867598	-0.842416
2.40002	-0.315222	0.233735	0.264726	0.617701	1.01166	0.494806	1.05022		0.606721	-1.28705	0.950773	0.75169	-0.584843
2.50003	-0.0290304	0.255199	0.361316	0.682094	0.754089	0.559199	0.844164		1.05747	-1.26129	0.6932	0.28806	-0.596551
2.60003	0.114065	0.512772	0.618889	0.778683	0.689696	0.687986	0.8828		1.25065	-0.849172	0.353673	0.0948803	-0.409226
2.70003	0.0138983	0.491307	0.522299	0.617701	1.14045	0.623592	0.998708		2.02337	-0.565843	0.459043	-0.0725418	-0.491181
2.80003	-0.0147208	0.126413	0.296923	0.617701	1.26923	0.687986	0.805528		1.7658	-0.746143	0.142932	-0.175571	-0.362394
2.90003	-0.04334	-0.217017	0.13594	0.392325	1.46241	0.36602	1.03734		1.25065	-0.540085	-0.0561017	-0.36875	-0.38581
3.00003	-0.143507	-0.538983	0.0715471	0.360128	1.52681	0.0440543	1.41082		1.05747	-0.411299	0.0726846	-0.497536	-0.374102
3.10003	-0.315222	-0.689234	0.00715393	0.0059659	1.14045	-0.0847319	1.75855		0.671114	-0.437056	0.306841	-0.330114	-0.643383
3.20003	-0.444008	-0.882413	0.0393505	-0.187213	0.625303	0.172841	1.70703		0.606721	-0.334027	0.26001	-0.446022	-0.573136
3.30003	-0.40108	-0.667769	0.103744	-0.670162	-0.147415	-0.342304	1.97748		0.864293	-0.411299	0.412212	-0.227085	-0.760461
3.40003	-0.315222	-0.560447	-0.153829	-0.734555	-0.340594	-0.0203388	1.88733		1.12187	-0.127969	0.564414	-0.265721	-0.854124
3.50004	-0.172126	-0.259946	-0.282615	-0.670162	-0.404987	0.36602	1.26916		1.37944	0.000817001	0.6932	-0.175571	-0.737045
3.60004	-0.200745	-0.0667666	-0.121632	-0.509179	-0.404987	0.301627	0.818407		1.31504	0.155361	0.669784	-0.111178	-0.772169
3.70004	0.128375	0.083484	-0.314812	-0.187213	-0.276201	-0.213518	0.470684		1.44383	0.25839	0.763447	0.107759	-0.71363
3.80004	0.156994	-0.152624	-0.507991	0.134752	-0.0830217	0.301627	0.354777		1.83019	0.206875	0.903941	0.0433658	-0.573136
3.90004	0.114065	0.147877	-0.218222	0.295735	-0.340594	-0.0847319	0.0972041		1.57262	0.25839	0.880526	-0.162692	-0.502889
4.00004	0.0282079	-0.0453022	0.23253	0.424521	-0.726953	-0.406698	0.148719		1.05747	0.412933	0.798571	-0.0339059	-0.420934
4.10004	0.242852	0.0190909	0.32912	0.585504	-0.791346	-0.406698	0.122961		0.864293	0.43869	0.681492	-0.0210273	-0.245316
4.20004	0.199923	0.0405553	0.812068	0.521111	-0.46938	0.237234	0.251748		0.542327	0.618991	0.330257	0.0948803	-0.210193
4.30004	0.171304	0.0620196	1.06964	0.649897	-0.726953	-0.0847319	-0.0573394		0.477934	0.670506	0.318549	0.159273	-0.303855
4.40004	0.0711367	-0.174088	1.29502	0.199145	-0.984525	0.172841	-0.199004		0.993079	0.644748	0.318549	0.532754	-0.409226
4.50005	0.171304	-0.195553	1.19843	0.231342	-0.66256	0.687986	-0.14749		0.928686	0.825049	0.166347	0.442603	-0.561428
4.60005	-0.0862688	-0.560447	1.456	0.0059659	-0.66256	0.752379	-0.366426		0.993079	0.747777	0.213179	0.545632	-0.655091
4.70005	0.0425175	-0.13116	1.13403	0.102556	-1.2421	0.816772	-0.52097		0.7999	0.72202	0.435628	0.481239	-0.608259
4.80005	0.0568271	0.147877	1.00525	-0.380393	-1.2421	0.559199	-0.224762		0.220362	0.567477	0.599537	0.429725	-0.748753
4.90005	0.142685	0.319592	0.940854	0.0059659	-0.920132	0.752379	-0.108854		-0.0372108	0.206875	0.786863	0.545632	-0.760461
5.00005	-0.0290304	0.684487	1.03744	0.0059659	-1.1777	-0.0847319	-0.14749		0.284755	-0.0506975	0.903941	0.635783	-0.491181
5.10005	0.0425175	0.856202	0.651085	0.231342	-1.43528	-0.213518	0.174476		0.349148	-0.0506975	1.03273	0.429725	-0.514596
5.20005	-0.143507	0.534236	0.522299	0.166949	-1.37088	-0.728663	0.238869		0.349148	0.0265743	1.1381	0.403967	-0.619967
5.30005	-0.114888	0.233735	0.651085	0.360128	-0.791346	-0.471091	0.174476		0.671114	0.335661	0.950773	0.133516	-0.467765
5.40005	-0.157817	0.169342	0.522299	0.424521	-0.66256	-0.0847319	0.213112		0.542327	0.464448	0.939065	0.00472996	-0.479473
5.50006	-0.100578	-0.0667666	0.296923	0.070359	-0.211808	0.623592	0.174476		0.735507	0.412933	0.704908	-0.0725418	-0.643383
5.60006	-0.186436	0.0620196	0.32912	-0.0906238	0.110158	0.945558	-0.108854		0.7999	0.747777	0.786863	-0.00814866	-0.479473
5.70006	-0.114888	0.083484	0.586692	-0.187213	-0.0830217	1.26752	-0.0315821		0.477934	0.464448	0.646369	0.0948803	-0.432642
5.80006	-0.315222	0.40545	0.651085	0.0059659	-0.598167	1.78267	-0.250519		0.284755	0.490205	0.517583	0.416846	-0.374102
5.90006	-0.157817	0.534236	0.715478	0.070359	-0.855739	1.13874	-0.340669		0.542327	0.25839	0.482459	0.46836	-0.198485
6.00006	-0.186436	0.426914	0.651085	0.488914	-1.37088	1.20313	-0.43082		-0.0372108	0.181118	0.798571	0.403967	-0.233608
6.10006	-0.215055	0.233735	0.779871	0.553307	-1.88603	1.07434	-0.250519		0.413541	-0.205241	0.517583	0.352453	-0.374102
6.20006	-0.229365	-0.00237348	0.876461	0.553307	-1.37088	0.687986	-0.417941		1.12187	-0.359785	0.459043	0.236545	-0.54972
6.30006	-0.04334	-0.0667666	0.908658	0.553307	-1.04892	0.430413	-0.379305		1.37944	-0.514328	0.459043	0.0176086	-0.666798
6.40006	-0.0147208	-0.0667666	1.03744	0.456718	-1.37088	0.494806	-0.23764		1.37944	-0.617357	0.400504	-0.00814866	-1.01803
6.50007	0.214233	0.104948	1.456	0.327932	-0.791346	0.36602	0.148719		1.44383	-0.668872	0.400504	-0.0210273	-0.994618
6.60007	0.199923	0.0405553	1.19843	0.231342	-0.598167	-0.0203388	0.187354		1.12187	-0.668872	0.540998	-0.0339059	-1.01803
6.70007	0.357328	0.383985	1.23062	0.0381625	-0.855739	0.430413	0.754014		0.606721	-0.437056	0.775155	0.197909	-0.912663
6.80007	0.343019	0.534236	1.32721	0.0059659	-1.69285	0.559199	0.844164		0.0271824	-0.411299	0.786863	0.300938	-0.748753
6.90007	0.343019	0.469843	0.812068	0.263538	-1.37088	0.881165	0.844164		-0.23039	-0.282513	0.950773	0.172152	-0.479473
7.00007	0.28578	0.255199	0.457906	0.263538	-1.49967	0.687986	0.522199		0.0271824	-0.462814	0.868818	0.262302	-0.479473
7.10007	0.28578	0.426914	0.747675	0.456718	-1.82164	1.20313	0.59947		0.0271824	-0.514328	0.903941	0.159273	-0.409226
7.20007	0.0997558	0.126413	0.457906	0.682094	-2.07921	1.13874	0.161597		0.284755	-0.385542	0.915649	-0.0467845	-0.444349
7.30007	-0.0147208	-0.0667666	0.490102	0.488914	-1.56406	1.13874	0.122961		0.477934	-0.643114	0.997604	-0.0467845	-0.538012
7.40007	-0.200745	0.0190909	0.940854	0.295735	-1.69285	1.07434	0.0972041		0.284755	-0.514328	1.02102	0.107759	-0.655091
7.50008	-0.186436	0.298128	1.13403	0.456718	-2.20799	1.07434	0.354777		0.0915755	-0.230998	1.11468	0.0176086	-0.584843
7.60008	-0.200745	0.0405553	1.16623	0.134752	-1.88603	1.33192	0.329019		-0.101604	-0.0506975	1.36055	-0.0339059	-0.690214
7.70008	-0.200745	0.169342	1.19843	0.0381625	-1.43528	1.33192	0.50932		-0.101604	-0.462814	1.22005	-0.0339059	-0.608259
7.80008	-0.229365	0.083484	1.10184	0.327932	-1.11331	1.65388	0.560835		-0.101604	-0.153727	1.06785	-0.0210273	-0.619967
7.90008	-0.100578	0.298128	1.06964	0.231342	-0.533774	1.58949	0.432048		0.606721	-0.488571	0.669784	0.0176086	-0.526304
8.00008	-0.200745	0.21227	1.19843	-0.283803	-0.404987	1.13874	0.161597		0.735507	-0.488571	0.377088	0.0820017	-0.573136
8.10008	-0.0576496	0.469843	0.747675	-0.0262307	-0.855739	0.430413	0.22599		0.928686	-0.746143	0.0843924	0.236545	-0.491181
8.20008	0.156994	0.598629	0.586692	0.0059659	-0.791346	-0.0847319	0.00705372		0.993079	-0.5916	0.0726846	0.442603	-0.643383
8.30008	0.400257	0.727415	0.457906	-0.0262307	-0.855739	-0.406698	0.0199323		1.05747	-0.617357	-0.0209782	0.365331	-0.573136
8.40008	0.500424	0.5557	-0.0894358	-0.12282	-1.1777	-0.0203388	0.200233		0.477934	-0.30827	0.00243753	0.28806	-0.374102
8.50009	0.371638	0.598629	-0.540188	-0.12282	-0.791346	0.623592	0.290383		0.606721	-0.797658	-0.0443938	0.275181	-0.538012
8.60009	0.343019	0.512772	-0.153829	0.0059659	-0.0830217	0.816772	0.122961		0.477934	-0.617357	-0.126349	0.275181	-0.573136
8.70009	0.0997558	0.663022	0.0393505	0.263538	0.303337	1.20313	0.0456896		0.349148	-0.462814	-0.278551	0.107759	-0.397518
8.80009	-0.04334	0.641558	0.296923	0.231342	0.56091	1.20313	-0.250519		0.413541	-0.565843	-0.138057	0.236545	-0.456057
8.90009	-0.272293	0.727415	0.812068	0.295735	0.882875	1.26752	-0.379305		0.0271824	-0.462814	-0.0209781	0.262302	-0.608259
9.00009	-0.286603	0.641558	1.16623	0.585504	0.754089	1.33192	-0.585363		-0.0372108	-0.127969	0.377088	0.352453	-0.374102
9.10009	-0.486937	0.834737	0.908658	0.585504	0.689696	1.71828	-0.52097		-0.552356	-0.205241	0.377088	0.37821	-0.456057
9.20009	-0.40108	0.641558	0.779871	0.521111	0.303337	1.78267	-0.714149		-1.0675	-0.488571	0.704908	0.481239	-0.526304
9.30009	-0.38677	0.813273	0.554496	0.360128	0.36773	1.58949	-0.276276		-1.32507	-0.30827	0.892233	0.37821	-0.432642
9.40009	-0.257984	0.663022	0.296923	0.360128	-0.211808	1.20313	-0.392184		-1.19629	-0.668872	0.939065	0.275181	-0.432642
9.5001	-0.286603	0.684487	0.168137	0.360128	-0.920132	1.20313	-0.211883		-1.45386	-0.437056	0.915649	0.236545	-0.479473
9.6001	-0.114888	0.448378	0.264726	0.070359	-2.27239	0.945558	-0.160368		-1.19629	-0.385542	1.12639	0.300938	-0.374102
9.7001	-0.129198	0.21227	0.361316	-0.0906238	-2.59435	1.13874	0.22599		-0.487963	-0.127969	0.96248	0.185031	-0.420934
9.8001	-0.558485	0.104948	0.200333	0.102556	-3.1095	1.4607	0.0843255		-0.0372108	-0.540085	0.728324	0.429725	-0.38581
9.9001	-0.644343	0.190806	0.200333	0.199145	-3.36707	1.33192	0.277505		0.155969	-0.256756	0.447335	0.506996	-0.538012
10.0001	-0.644343	0.169342	-0.0572392	0.231342	-2.33678	1.13874	0.303262		-0.0372108	-0.282513	0.365381	0.352453	-0.772169
10.1001	-0.472628	0.448378	0.13594	0.424521	-0.726953	1.00995	0.200233		0.477934	-0.205241	0.142932	0.313817	-0.760461
10.2001	-0.529866	0.641558	0.23253	0.424521	-0.598167	0.752379	0.174476		0.413541	-0.334027	-0.0678095	0.120638	-0.830708
10.3001	-0.200745	0.383985	0.264726	0.553307	-0.0830217	0.623592	0.174476		-0.165997	0.0780888	0.0375611	-0.098299	-0.98291
10.4001	-0.415389	0.298128	0.522299	0.295735	0.174551	0.881165	0.22599		-0.42357	-0.205241	0.26001	-0.124056	-0.795585
10.5001	-0.272293	0.512772	0.393513	0.295735	-0.276201	0.945558	0.200233		-0.294783	-0.205241	0.131224	0.107759	-0.725338
10.6001	-0.458318	0.448378	0.0715471	0.327932	-0.598167	0.881165	0.110083		-0.681142	-0.205241	0.201471	-0.0467845	-0.526304
10.7001	-0.501247	0.663022	-0.153829	0.360128	-0.340594	1.33192	0.0199323		-0.294783	-0.282513	0.482459	0.223667	-0.479473
10.8001	-0.38677	0.663022	-0.218222	0.166949	-0.66256	0.945558	-0.14749		0.155969	-0.437056	0.552706	0.416846	-0.338979
10.9001	-0.114888	0.791808	-0.411401	0.327932	-0.211808	0.945558	-0.482334		0.477934	-0.153727	0.482459	0.494118	-0.584843
11.0001	-0.286603	0.705951	0.0393505	0.424521	0.238944	0.494806	-0.559606		0.864293	-0.0506975	0.658077	0.365331	-0.526304
11.1001	-0.300913	0.834737	0.296923	0.231342	0.689696	0.752379	-0.276276		1.25065	-0.514328	0.517583	0.532754	-0.71363
11.2001	-0.358151	0.770344	0.296923	0.102556	0.818482	0.237234	-0.108854		0.284755	-0.5916	0.400504	0.262302	-0.666798
11.3001	-0.315222	0.856202	0.23253	0.0381625	0.689696	0.301627	0.0585682		-0.0372108	-0.694629	0.318549	0.249424	-0.678506
11.4001	-0.544175	0.770344	0.13594	-0.187213	0.56091	0.172841	0.0972041		0.542327	-0.462814	0.435628	-0.149814	-0.409226
11.5001	-0.515556	0.920595	-0.0894358	-0.541376	0.303337	0.494806	0.277505		0.349148	-0.437056	0.119516	0.0948803	-0.362394
11.6001	-0.444008	0.856202	-0.668974	-0.541376	-0.147415	0.36602	0.213112		-0.101604	0.387176	0.131224	-0.0467845	-0.292147
11.7001	-0.587104	0.512772	-0.540188	-0.444786	-0.66256	0.623592	0.00705373		0.155969	0.670506	0.283426	0.197909	-0.245316
11.8001	-0.844677	0.598629	-0.186025	-0.412589	-0.340594	0.945558	0.200233		0.542327	0.928078	-0.0795174	0.185031	-0.38581
11.9001	-0.844677	0.834737	-0.0250426	-0.380393	-0.404987	0.816772	0.50932		-0.294783	0.773535	-0.0795174	0.494118	-0.444349
12.0001	-1.00208	0.641558	-0.0894358	-0.283803	-0.791346	0.623592	0.59947		-0.23039	0.979593	0.189763	0.210788	-0.362394
12.1001	-1.18811	1.04938	0.393513	-0.155017	-1.04892	0.430413	0.573713		0.0915755	0.490205	0.0843924	0.197909	-0.362394
12.2001	-0.858986	1.17817	0.32912	-0.12282	-0.791346	0.430413	0.921436		0.284755	0.567477	0.00243753	0.300938	-0.362394
12.3001	-0.587104	1.56453	0.0715471	0.102556	-0.984525	0.36602	0.972951		-0.0372108	0.618991	0.271718	-0.0339059	-0.374102
12.4001	-0.501247	1.34988	0.0393505	0.263538	-0.920132	0.623592	0.998708		0.0915755	0.515962	0.213179	-0.0467845	-0.338979
12.5001	-0.300913	1.19963	-0.0572392	0.231342	-0.791346	0.945558	1.01159		-0.23039	0.206875	0.0961003	0.159273	-0.257024
12.6001	0.114065	0.813273	-0.218222	0.0059659	-0.984525	0.945558	1.10174		-0.23039	0.567477	0.248302	0.0691231	-0.292147
12.7001	0.0138983	0.89913	0.103744	-0.0262307	-1.1777	0.687986	0.895679		-0.0372108	0.284147	0.107808	-0.0467845	-0.186777
12.8001	-0.200745	0.5557	0.296923	-0.155017	-1.69285	0.559199	0.638106		0.284755	0.206875	0.166347	0.159273	-0.128238
12.9001	0.0138983	0.448378	0.32912	-0.283803	-2.1436	0.36602	0.625228		0.349148	0.515962	0.0726846	0.391089	-0.2219
13.0001	-0.100578	0.663022	0.747675	-0.187213	-1.75724	0.0440543	0.329019		0.671114	0.515962	0.131224	0.275181	-0.292147
13.1001	-0.458318	0.534236	0.715478	0.134752	-0.920132	0.36602	0.122961		0.284755	0.284147	0.154639	0.494118	-0.303855
13.2001	-0.300913	0.620093	0.457906	0.199145	-0.791346	0.237234	0.0843255		0.0271824	0.644748	0.283426	0.249424	-0.491181
13.3001	-0.0719592	0.577165	0.32912	0.166949	0.110158	0.0440543	-0.14749		-0.359176	0.928078	0.388796	0.46836	-0.28044
13.4001	-0.200745	0.448378	0.200333	0.617701	0.56091	0.172841	-0.572484		-0.294783	1.00535	0.189763	0.262302	-0.338979
13.5001	0.0711367	0.5557	-0.282615	0.585504	0.303337	0.172841	-0.263397		-0.294783	1.00535	0.224887	0.352453	-0.233608
13.6001	0.0138983	0.341057	0.00715393	0.424521	-0.0186286	-0.213518	0.0714469		-0.101604	1.13414	0.166347	0.622904	-0.2219
13.7001	-0.229365	0.255199	0.168137	0.0381625	-0.211808	0.301627	0.148719		-0.165997	1.10838	0.0375611	0.957748	-0.2219
13.8001	-0.429699	0.169342	0.00715393	0.134752	-1.2421	0.494806	0.457806		0.220362	0.644748	-0.255135	0.841841	-0.491181
13.9001	-0.272293	0.577165	0.103744	-0.155017	-1.37088	0.816772	0.908557		-0.23039	0.670506	-0.126349	0.455482	-0.397518
14.0001	-0.257984	0.469843	0.844265	-0.12282	-1.1777	0.945558	1.03734		0.155969	0.43869	-0.138057	0.532754	-0.467765
14.1001	-0.000411249	0.684487	0.812068	0.0059659	-1.1777	1.07434	0.8828		0.477934	0.490205	-0.0443938	0.28806	-0.338979
14.2001	0.114065	0.469843	0.779871	0.070359	-0.984525	0.816772	0.831286		0.413541	0.335661	-0.032686	0.262302	-0.350687
14.3001	0.371638	0.255199	1.00525	-0.187213	0.0457646	0.623592	0.998708		0.349148	0.696263	0.388796	0.300938	-0.210193
14.4001	0.3144	0.40545	1.06964	0.0059659	0.432123	0.301627	0.985829		0.284755	0.25839	0.540998	0.635783	-0.186777
14.5001	0.156994	0.319592	0.457906	0.0381625	0.947268	0.559199	1.02447		0.0271824	0.464448	0.459043	0.365331	-0.233608
14.6001	-0.0147208	0.362521	0.32912	0.231342	1.14045	0.945558	1.11462		-0.42357	0.567477	0.798571	0.506996	-0.315563
14.7001	0.156994	0.663022	0.264726	0.392325	0.947268	1.07434	1.35931		-0.359176	0.979593	0.845402	0.713054	-0.397518
14.8001	-0.0862688	0.813273	0.361316	0.521111	0.303337	1.65388	1.0631		-0.809928	0.567477	0.470751	0.571389	-0.409226
14.9001	-0.157817	0.598629	0.296923	0.360128	-0.0186286	1.65388	1.08886		-0.165997	1.03111	0.669784	0.764569	-0.456057
15.0002	-0.286603	0.598629	0.296923	0.617701	-0.598167	1.26752	0.895679		-0.487963	0.850806	0.85711	0.931991	-0.526304
15.1002	-0.0576496	0.813273	0.425709	0.682094	-0.276201	1.07434	0.908557		-0.487963	0.567477	0.611245	0.545632	-0.573136
15.2002	-0.129198	0.856202	0.32912	0.71429	0.56091	0.687986	0.638106		-0.359176	0.361419	0.704908	0.300938	-0.338979
15.3002	-0.114888	1.04938	0.200333	0.649897	0.689696	0.0440543	0.908557		-0.165997	0.464448	1.07956	0.300938	-0.374102
15.4002	-0.100578	0.877666	-0.0572392	0.649897	0.818482	0.237234	0.831286		-0.23039	0.0780888	1.05614	0.0691231	-0.257024
15.5002	0.228542	0.5557	-0.121632	0.778683	0.754089	0.301627	0.573713		-0.294783	0.0780888	0.997604	0.0176086	-0.175069
15.6002	0.257161	0.276663	-0.282615	0.778683	-0.147415	0.687986	0.715378		-0.616749	-0.0249402	0.985896	0.403967	-0.338979
15.7002	0.0997558	-0.00237348	-0.0572392	0.843077	-0.533774	0.752379	0.960072		-0.23039	-0.230998	0.716616	0.313817	-0.374102
15.8002	0.171304	-0.259946	-0.0572392	0.778683	-0.984525	0.623592	0.960072		-0.101604	-0.30827	0.400504	0.455482	-0.338979
15.9002	0.0425175	-0.00237348	0.264726	0.971863	-1.04892	0.301627	1.14037		-0.101604	-0.540085	0.470751	0.494118	-0.210193
16.0002	-0.100578	0.276663	0.393513	0.521111	-1.11331	0.108447	1.21764		0.155969	-0.411299	0.248302	0.687297	-0.175069
16.1002	-0.215055	0.0405553	0.200333	0.392325	-1.11331	-0.66427	0.972951		0.0915755	-0.30827	0.295134	0.455482	0.04738
16.2002	-0.0576496	0.147877	0.0715471	0.585504	-1.43528	-1.05063	0.741135		-0.359176	-0.385542	0.658077	0.506996	-0.0345749
16.3002	0.0997558	0.319592	0.264726	0.971863	-1.11331	-0.857449	0.444927		-0.745535	-0.30827	0.681492	0.481239	-0.104822
16.4002	0.199923	0.083484	0.13594	0.875273	-1.37088	-0.406698	0.303262		-0.487963	0.206875	0.400504	0.455482	-0.350687
16.5002	0.271471	0.0190909	0.0715471	1.06845	-1.30649	-0.406698	0.290383		-0.359176	0.232632	0.517583	0.0948803	-0.479473
16.6002	0.0854463	0.255199	0.425709	0.81088	-0.533774	-0.0847319	-0.0830966		0.349148	0.129603	0.482459	0.37821	-0.760461
16.7002	0.0711367	0.190806	0.522299	0.521111	0.110158	0.494806	-0.23764		0.735507	0.181118	0.283426	0.558511	-0.690214
16.8002	-0.0576496	0.0620196	0.361316	0.199145	0.689696	0.945558	0.0199324		0.928686	0.490205	0.505875	0.571389	-0.71363
16.9002	-0.0290304	-0.088231	0.361316	0.360128	1.01166	0.108447	-0.160368		0.542327	0.567477	0.564414	0.622904	-0.690214
17.0002	-0.129198	0.104948	0.522299	0.199145	0.689696	0.301627	-0.173247		0.0915755	0.670506	0.658077	0.983506	-0.666798
17.1002	0.0138983	0.0620196	0.264726	0.263538	0.432123	0.623592	0.0456896		0.0271824	0.902321	0.716616	0.94487	-0.397518
17.2002	-0.04334	0.233735	0.0393505	0.521111	0.110158	0.172841	0.0714469		-0.23039	0.644748	0.939065	1.00926	-0.479473
17.3002	0.0282079	0.40545	-0.0250426	0.456718	-0.147415	-0.213518	0.174476		-0.0372108	0.129603	0.6932	0.880476	-0.420934
17.4002	-0.0147208	0.684487	0.264726	0.263538	-0.211808	0.36602	0.22599		-0.0372108	-0.179484	0.892233	0.983506	-0.491181
17.5002	-0.04334	0.5557	0.32912	0.199145	-0.147415	0.623592	0.316141		0.220362	-0.0249402	0.892233	0.957748	-0.456057
17.6002	-0.100578	0.641558	0.747675	0.327932	-0.276201	0.687986	0.573713		0.0915755	-0.359784	0.494167	0.931991	-0.397518
17.7002	-0.415389	0.233735	0.940854	0.295735	-0.211808	0.881165	0.638106		0.220362	-0.256755	0.236594	0.841841	-0.491181
17.8002	-0.415389	0.255199	1.10184	0.360128	-0.340594	0.945558	0.367655		0.477934	0.0523315	0.271718	0.725933	-0.538012
17.9002	-0.429699	0.0190909	0.812068	0.424521	0.303337	0.816772	0.367655		0.7999	0.181118	0.107808	0.519875	-0.655091
18.0002	-0.0147208	0.0620196	0.779871	0.456718	0.947268	0.816772	0.470684		0.928686	0.0780888	-0.17318	0.429725	-0.760461
18.1002	0.0711367	-0.238482	0.586692	0.521111	1.14045	0.237234	0.380534		0.606721	0.515962	0.0961003	0.223667	-0.842416
18.2002	0.28578	0.383985	0.425709	0.617701	0.818482	0.623592	0.535077		0.349148	0.387176	0.271718	0.0691231	-0.596551
18.3002	0.142685	0.255199	0.361316	0.90747	1.26923	0.945558	0.59947		-0.294783	0.43869	0.295134	0.197909	-0.514596
18.4002	0.0138983	0.620093	0.490102	0.939666	1.01166	1.13874	1.03734		-0.681142	0.0780888	0.388796	0.37821	-0.28044
18.5002	-0.300913	0.40545	0.425709	1.16504	1.07605	0.881165	1.17901		-0.616749	-0.282513	0.740032	0.365331	-0.128238
18.6002	-0.200745	0.770344	0.13594	0.971863	1.14045	0.816772	1.07598		-0.359176	-0.179484	0.786863	0.622904	-0.432642
18.7002	0.0711367	0.577165	0.32912	0.71429	1.71999	0.881165	1.12749		-0.294783	0.232632	0.763447	0.352453	-0.561428
18.8002	0.30009	0.298128	0.23253	0.392325	1.39802	1.13874	1.12749		0.220362	0.0780888	0.821986	0.197909	-0.619967
18.9002	0.28578	0.319592	-0.121632	0.070359	1.01166	0.430413	0.79265		0.155969	0.567477	0.950773	0.223667	-0.725338
19.0002	0.228542	0.448378	0.0393505	-0.155017	0.689696	0.301627	0.547956		0.0271824	0.876564	0.798571	0.223667	-0.795585
19.1002	0.0282079	0.5557	0.200333	-0.0262307	0.947268	0.494806	0.8828		-0.552356	0.464448	0.845402	0.172152	-0.479473
19.2002	0.0568271	0.448378	-0.0250426	0.070359	0.625303	0.430413	0.934315		-0.101604	0.232632	0.903941	0.571389	-0.491181
19.3002	0.0568271	0.920595	-0.0572392	0.231342	1.39802	0.301627	1.25628		0.0915755	0.387176	0.974188	0.919112	-0.538012
19.4002	0.271471	0.577165	0.457906	0.263538	1.20484	0.430413	1.2434		0.928686	0.464448	1.03273	0.803205	-0.491181
19.5002	0.571972	0.727415	0.361316	0.521111	1.33363	1.20313	0.972951		0.993079	0.593234	1.12639	0.764569	-0.350687
19.6002	0.614901	0.512772	0.361316	0.0381625	1.01166	1.26752	0.535077		1.7014	0.670506	1.17322	0.532754	-0.409226
19.7002	0.385948	0.512772	0.522299	0.0381625	1.07605	1.39631	0.406291		1.57262	0.825049	1.25518	0.597147	-0.397518
19.8002	0.257161	0.319592	0.296923	0.102556	0.110158	1.07434	-0.14749		1.12187	1.03111	1.41909	0.300938	-0.362394
19.9002	0.0711367	0.534236	0.32912	0.392325	0.818482	1.33192	-0.263397		0.7999	0.670506	1.24347	0.249424	-0.409226
20.0002	-0.300913	0.126413	0.393513	0.521111	0.818482	0.945558	-0.0573394		0.928686	0.567477	1.31372	0.352453	-0.479473
20.1002	-0.415389	0.21227	0.200333	0.617701	0.818482	0.430413	-0.108854		1.50822	0.387176	1.45421	0.494118	-0.491181
20.2002	-0.229365	0.255199	0.168137	0.553307	0.947268	0.172841	0.0972041		1.05747	0.335661	1.46592	0.339574	-0.444349
20.3002	-0.286603	0.233735	0.457906	0.456718	1.33363	-0.149125	0.329019		1.12187	0.206875	1.06785	0.622904	-0.514596
20.4002	-0.0290304	0.21227	-0.0250426	0.134752	1.01166	-0.406698	0.354777		0.671114	-0.0506975	0.845402	0.841841	-0.573136
20.5002	-0.0862688	0.5557	-0.121632	-0.316	0.625303	0.0440543	0.393412		0.606721	0.000817002	0.833694	0.867598	-0.584843
20.6002	0.0568271	0.684487	0.23253	-0.0584272	0.303337	0.752379	0.754014		0.0915755	0.232632	0.576122	0.94487	-0.737045
20.7002	-0.315222	0.362521	0.23253	-0.21941	-0.211808	0.559199	0.612349		0.671114	0.567477	0.295134	0.957748	-0.842416
20.8002	-0.215055	0.534236	0.361316	-0.509179	0.303337	0.881165	0.715378		0.993079	0.773535	0.52929	0.854719	-0.737045
20.9002	-0.38677	0.40545	0.586692	-0.573572	0.432123	1.07434	0.728257		1.18626	0.953835	0.681492	0.713054	-0.655091
21.0002	-0.257984	0.512772	0.715478	-0.348196	0.818482	0.752379	0.869922		0.928686	0.928078	0.517583	0.828962	-0.608259
21.1002	-0.114888	-0.302875	0.554496	-0.476983	1.26923	0.301627	0.638106		0.542327	0.902321	0.564414	0.700176	-0.608259
21.2002	0.28578	-0.00237348	0.586692	-0.0906238	1.97756	0.623592	0.367655		-0.165997	0.361419	0.681492	0.700176	-0.479473
21.3002	0.271471	-0.28141	0.425709	0.102556	1.52681	0.430413	0.41917		-0.681142	0.155361	0.751739	0.648661	-0.491181
21.4002	0.28578	-0.217017	0.32912	0.199145	1.33363	0.430413	0.470684		-0.681142	0.309904	0.810279	0.519875	-0.420934
21.5002	0.171304	-0.431661	0.23253	0.0059659	1.07605	0.430413	0.329019		-0.552356	0.0523315	0.880526	0.416846	-0.54972
21.6002	0.0854463	0.341057	-0.0572392	-0.0906238	0.818482	0.623592	0.535077		-0.487963	0.129603	1.12639	0.46836	-0.362394
21.7002	-0.172126	0.298128	0.0715471	-0.412589	0.432123	0.237234	0.754014		0.155969	0.490205	1.20835	0.532754	-0.374102
21.8002	-0.215055	0.383985	0.0393505	-0.412589	0.238944	-0.0847319	0.303262		0.477934	0.284147	0.915649	0.494118	-0.315563
21.9002	-0.100578	0.469843	0.361316	-0.348196	0.36773	-0.213518	-0.0187035		0.349148	0.0780888	0.903941	0.597147	-0.397518
22.0002	-0.0290304	0.5557	0.425709	-0.316	0.625303	-0.213518	-0.070218		-0.165997	0.335661	0.950773	0.66154	-0.233608
22.1002	-0.0719592	0.0620196	0.779871	-0.283803	0.56091	0.108447	-0.250519		0.220362	0.515962	0.669784	0.584268	-0.0931141
22.2002	-0.100578	-0.0667666	0.715478	-0.380393	0.36773	-0.0203388	-0.52097		-0.294783	0.464448	0.681492	0.416846	-0.128238
22.3002	-0.40108	0.083484	0.779871	-0.316	-0.0186286	0.108447	-0.417941		-0.552356	0.541719	0.6932	0.28806	-0.2219
22.4002	-0.38677	-0.238482	0.393513	-0.476983	-0.0830217	0.881165	-0.276276		-0.616749	0.361419	0.658077	0.275181	-0.139945
22.5002	-0.215055	-0.13116	0.23253	-0.251607	0.174551	0.881165	-0.121733		-0.294783	0.309904	0.447335	0.120638	-0.198485
22.6002	-0.200745	0.233735	0.425709	0.0381625	0.0457646	0.301627	-0.0830966		-0.23039	0.387176	0.634661	0.236545	-0.432642
22.7002	-0.129198	0.448378	0.457906	0.392325	-0.147415	0.945558	0.0843255		0.0271824	0.206875	0.716616	0.185031	-0.292147
22.8002	0.142685	0.491307	0.296923	0.231342	-0.46938	1.4607	0.148719		-0.165997	0.593234	0.915649	0.313817	-0.362394
22.9002	0.271471	0.770344	0.490102	0.617701	-1.11331	0.816772	0.277505		-0.101604	0.902321	0.927357	0.262302	-0.54972
23.0002	0.242852	0.791808	0.296923	0.843077	-1.75724	0.816772	0.380534		-0.165997	0.799292	0.927357	0.300938	-0.631675
23.1002	0.0997558	0.791808	0.0715471	0.843077	-2.01482	1.4607	0.638106		0.0271824	0.515962	0.669784	0.146395	-0.596551
23.2002	0.0568271	0.663022	-0.0250426	0.843077	-2.1436	0.559199	0.689621		-0.0372108	0.72202	0.576122	0.339574	-0.666798
23.3002	0.0997558	0.5557	-0.0572392	1.10065	-1.62846	0.237234	0.998708		0.284755	0.155361	0.681492	0.416846	-0.596551
23.4002	0.114065	0.469843	-0.0894358	0.81088	-1.37088	0.172841	1.11462		0.0915755	0.206875	0.775155	0.391089	-0.491181
23.5002	0.214233	0.641558	0.361316	0.521111	-1.04892	-0.793056	1.28204		0.0915755	-0.127969	0.96248	0.597147	-0.666798
23.6002	0.142685	0.5557	0.32912	0.360128	-0.598167	-1.37259	1.03734		-0.745535	-0.617357	1.02102	0.674418	-0.619967
23.7002	0.28578	0.491307	0.103744	0.134752	-0.340594	-0.66427	1.33355		-0.552356	-0.385542	0.997604	0.416846	-0.54972
23.8002	0.371638	0.341057	0.296923	0.0059659	-0.0830217	-0.342304	1.26916		-0.487963	-0.488571	0.950773	0.519875	-0.456057
23.9002	0.0997558	0.298128	0.32912	0.0381625	0.625303	-0.213518	1.37219		-0.42357	-0.540085	0.950773	0.558511	-0.292147
24.0002	-0.100578	0.255199	0.200333	0.0381625	0.625303	0.559199	1.10174		-0.23039	-0.282513	1.14981	0.223667	-0.151653
24.1002	0.185613	0.276663	0.200333	-0.0584272	0.754089	0.945558	1.02447		0.0915755	0.284147	1.14981	0.339574	-0.128238
24.2002	-0.0147208	0.491307	0.264726	0.0059659	1.14045	0.687986	0.650985		-0.0372108	-0.127969	1.38396	0.687297	-0.245316
24.3002	-0.243674	0.705951	0.264726	-0.0906238	0.882875	0.430413	0.638106		0.220362	0.103846	1.26688	0.635783	-0.327271
24.4002	-0.0147208	0.963523	0.200333	-0.316	0.56091	0.430413	0.367655		0.477934	0.0265743	1.30201	0.635783	-0.526304
24.5002	0.0711367	0.705951	0.23253	-0.734555	0.689696	0.36602	0.251748		0.0915755	0.181118	1.07956	0.506996	-0.526304
24.6002	-0.114888	0.74888	0.296923	-0.734555	0.625303	0.0440543	0.50932		0.0271824	-0.179484	1.11468	0.185031	-0.561428
24.7002	-0.0862688	0.963523	0.586692	-0.541376	0.818482	0.237234	0.702499		0.155969	-0.153727	0.868818	-0.0467845	-0.350687
24.8002	0.142685	0.89913	0.683282	-0.380393	0.754089	0.237234	0.766893		-0.0372108	0.000817	1.07956	-0.227085	-0.350687
24.9002	-0.0862688	0.641558	0.876461	-0.251607	1.07605	0.172841	0.947193		0.0271824	0.387176	0.798571	-0.252843	-0.28044
25.0003	-0.0862688	0.770344	0.683282	0.231342	0.689696	0.494806	0.857043		-0.101604	0.412933	0.833694	0.0304872	-0.456057
25.1003	-0.100578	0.705951	0.618889	0.231342	1.14045	0.494806	0.728257		0.0271824	0.593234	0.658077	0.210788	-0.619967
25.2003	0.0425175	0.5557	0.586692	-0.12282	0.625303	0.301627	0.676742		-0.0372108	0.361419	0.681492	0.107759	-0.795585
25.3003	-0.114888	0.598629	0.490102	-0.316	1.33363	0.0440543	0.560835		-0.552356	0.72202	0.0961003	0.0691231	-0.877539
25.4003	-0.229365	0.727415	0.425709	-0.187213	0.56091	0.430413	0.406291		-0.745535	0.361419	-0.00927032	0.120638	-0.701922
25.5003	-0.186436	0.74888	0.490102	-0.283803	0.818482	0.108447	0.303262		-0.165997	0.618991	-0.161472	-0.0339059	-0.596551
25.6003	0.0997558	0.426914	0.683282	-0.12282	0.496516	-0.0203388	0.174476		-0.101604	0.567477	-0.313674	-0.0467845	-0.502889
25.7003	0.0711367	0.147877	0.425709	0.199145	0.625303	0.0440543	0.341898		-0.0372108	1.08262	-0.629786	-0.0854204	-0.573136
25.8003	0.156994	0.0405553	0.361316	0.134752	0.432123	0.430413	0.432048		0.413541	0.696263	-0.301966	0.107759	-0.491181
25.9003	0.242852	0.0405553	0.393513	0.231342	0.882875	0.172841	0.702499		0.284755	0.644748	-0.032686	0.223667	-0.690214
26.0003	0.271471	0.0190909	0.457906	0.0381625	0.432123	0.237234	1.08886		-0.0372108	0.25839	0.0141454	0.352453	-0.491181
26.1003	0.171304	0.40545	0.32912	0.0381625	0.36773	0.559199	1.53961		-0.101604	0.593234	0.271718	0.391089	-0.397518
26.2003	0.0711367	0.448378	0.0393505	-0.0906238	0.432123	0.881165	1.61688		0.349148	0.593234	0.704908	0.519875	-0.397518
26.3003	-0.0290304	0.641558	0.0715471	0.166949	-0.147415	1.13874	1.81006		-0.42357	0.490205	0.728324	0.300938	-0.467765
26.4003	-0.143507	0.705951	-0.0894358	0.0381625	-0.598167	1.33192	1.56537		0.155969	0.670506	0.740032	0.223667	-0.303855
26.5003	-0.215055	0.512772	0.0393505	0.392325	-0.0830217	1.26752	1.4881		0.220362	0.670506	1.03273	0.120638	-0.362394
26.6003	-0.329532	0.577165	0.168137	0.134752	-0.276201	0.687986	1.33355		0.155969	0.515962	1.43079	0.0176086	-0.268732
26.7003	-0.329532	0.512772	0.457906	0.070359	-0.598167	-0.0847319	0.960072		-0.487963	0.464448	1.48933	-0.0210273	-0.467765
26.8003	-0.515556	0.577165	0.264726	0.231342	-0.598167	0.0440543	0.857043		0.349148	0.490205	1.4425	-0.188449	-0.479473
26.9003	-0.04334	0.448378	0.296923	0.166949	-0.340594	-0.406698	1.07598		-0.294783	0.412933	1.31372	-0.136935	-0.678506
27.0003	-0.0862688	0.362521	0.0715471	0.102556	-0.211808	-0.406698	1.19189		-0.101604	0.464448	1.03273	-0.252843	-0.491181
27.1003	-0.243674	0.233735	-0.0572392	0.392325	0.110158	-0.149125	0.908557		-0.294783	0.490205	0.704908	-0.175571	-0.526304
27.2003	-0.243674	0.083484	0.0715471	0.360128	0.36773	0.559199	1.01159		-0.616749	0.103846	0.341965	-0.0725418	-0.409226
27.3003	-0.000411249	-0.13116	0.264726	-0.155017	0.432123	-0.0847319	0.8828		-1.13189	0.0780888	0.248302	0.133516	-0.456057
27.4003	-0.172126	-0.00237348	0.264726	-0.21941	-0.0186286	-0.0203388	1.03734		-0.874321	0.309904	0.318549	0.223667	-0.315563
27.5003	-0.157817	0.298128	0.393513	-0.605769	-0.340594	0.0440543	0.8828		-0.616749	0.644748	0.599537	0.28806	-0.772169
27.6003	0.0997558	0.276663	0.554496	-0.702358	-0.46938	0.430413	1.25628		-0.42357	0.850806	0.599537	0.326696	-0.889247
27.7003	-0.172126	0.341057	0.457906	-0.573572	-0.0830217	0.108447	1.35931		-0.165997	1.00535	0.634661	0.197909	-0.865832
27.8003	-0.04334	0.469843	0.522299	-0.380393	0.432123	0.559199	1.4237		-0.0372108	0.928078	0.85711	0.352453	-0.783877
27.9003	-0.229365	0.276663	0.425709	-0.348196	1.07605	0.687986	1.10174		-0.294783	0.515962	0.798571	0.391089	-0.959494
28.0003	-0.04334	0.104948	0.425709	0.0381625	1.20484	0.36602	1.33355		-0.745535	0.464448	0.6932	0.236545	-0.678506
28.1003	-0.229365	0.104948	0.32912	0.199145	1.07605	-0.213518	0.998708		-0.938715	0.593234	0.634661	0.0820017	-0.619967
28.2003	-0.000411248	0.147877	0.457906	0.295735	0.689696	-0.406698	0.895679		-1.00311	0.902321	0.892233	0.0304872	-0.54972
28.3003	-0.129198	-0.00237348	0.522299	0.617701	0.432123	-1.05063	0.754014		-1.19629	1.15989	0.740032	-0.201328	-0.467765
28.4003	0.0568271	-0.0667666	0.522299	0.585504	-0.340594	-1.11502	0.754014		-1.13189	1.15989	0.868818	-0.600565	-0.292147
28.5003	-0.0862688	-0.00237348	0.490102	0.392325	-0.855739	-0.66427	0.316141		-1.0675	1.05686	0.798571	-0.446022	-0.467765
28.6003	-0.0290304	0.0620196	0.393513	0.166949	-0.598167	-0.277911	0.41917		-1.13189	0.593234	0.845402	-0.381629	-0.561428
28.7003	0.114065	0.319592	0.425709	0.360128	-0.598167	-0.0847319	0.470684		-0.681142	0.593234	0.810279	-0.2786	-0.526304
28.8003	0.271471	0.169342	0.296923	0.166949	-0.533774	0.36602	0.547956		-0.23039	0.593234	0.927357	-0.188449	-0.655091
28.9003	-0.100578	0.126413	0.32912	0.392325	0.238944	0.494806	0.638106		-0.487963	1.03111	0.775155	0.107759	-0.701922
29.0003	-0.100578	-0.109695	0.264726	0.392325	0.36773	0.559199	0.766893		-0.616749	0.825049	0.611245	0.0948803	-0.54972
29.1003	-0.0862688	-0.538983	0.13594	0.456718	-0.0186286	0.623592	0.779771		-0.616749	0.696263	0.658077	0.339574	-0.479473
29.2003	-0.286603	-0.839484	0.103744	0.070359	-0.340594	0.881165	1.08886		-0.616749	0.567477	0.669784	0.339574	-0.514596
29.3003	-0.486937	-0.496054	-0.186025	-0.0262307	-1.2421	0.881165	1.34643		-0.809928	0.25839	0.58783	0.37821	-0.420934
29.4003	-0.272293	-0.62484	-0.186025	0.134752	-1.82164	0.687986	1.41082		-0.42357	0.284147	0.646369	0.519875	-0.409226
29.5003	-0.343841	-0.453125	-0.153829	0.231342	-1.62846	0.36602	1.6684		-0.0372108	0.361419	0.950773	0.66154	-0.456057
29.6003	-0.37246	-0.195553	0.296923	0.392325	-1.69285	0.623592	2.05476		0.349148	0.825049	1.05614	0.339574	-0.397518
29.7003	-0.229365	-0.195553	0.651085	0.295735	-1.11331	0.430413	1.86158		-0.294783	1.00535	0.997604	0.300938	-0.268732
29.8003	-0.0862688	-0.431661	0.747675	0.521111	-0.276201	0.687986	1.50097		0.0915755	1.46898	1.30201	0.275181	-0.409226
29.9003	-0.0719592	-0.345803	0.908658	0.327932	-0.0186286	1.00995	1.26916		0.0271824	1.28868	1.30201	0.0304872	-0.54972
30.0003	0.0282079	-0.453125	0.973051	0.0059659	-0.0830217	1.13874	1.11462		-0.42357	1.44322	1.17322	-0.0725418	-0.456057
30.1003	-0.0719592	-0.47459	0.32912	-0.0906238	0.174551	0.752379	0.857043		-0.809928	1.00535	1.00931	0.223667	-0.655091
30.2003	0.0138983	-0.367268	-0.218222	0.231342	-0.340594	0.559199	0.985829		-0.487963	0.850806	0.985896	0.28806	-0.783877
30.3003	-0.129198	-0.195553	-0.0894358	0.231342	-0.404987	-0.0203388	0.947193		-0.487963	0.773535	0.786863	0.262302	-0.596551
30.4003	-0.186436	0.126413	-0.314812	0.327932	-0.404987	-0.0847319	1.02447		-0.487963	0.541719	0.892233	0.236545	-0.526304
30.5003	-0.300913	0.083484	-0.443598	0.424521	-0.726953	-0.0203388	0.985829		-0.23039	0.335661	0.892233	0.159273	-0.666798
30.6003	-0.257984	0.169342	-0.0572392	0.295735	-1.11331	0.0440543	0.779771		-0.23039	0.644748	0.880526	0.133516	-0.456057
30.7003	-0.329532	0.190806	0.103744	0.102556	-1.11331	0.172841	0.483563		-0.294783	0.670506	0.997604	0.365331	-0.561428
30.8003	-0.486937	0.126413	0.0715471	-0.155017	-1.43528	0.752379	0.560835		-0.487963	0.206875	0.833694	0.403967	-0.643383
30.9003	-0.472628	0.0405553	0.32912	-0.0584272	-1.30649	0.36602	0.689621		-0.42357	0.696263	0.775155	0.352453	-0.748753
31.0003	-0.74451	0.298128	0.457906	0.263538	-1.69285	-0.149125	0.741135		-0.294783	0.902321	0.786863	0.403967	-0.678506
31.1003	-0.672962	0.276663	0.168137	0.327932	-1.75724	-0.406698	0.895679		0.220362	0.747777	0.564414	0.28806	-0.737045
31.2003	-0.801748	0.190806	0.103744	-0.0906238	-1.69285	-0.599877	1.21764		0.413541	0.490205	0.412212	-0.0467845	-0.631675
31.3003	-0.687271	-0.0453022	0.13594	0.0381625	-1.62846	-1.05063	1.10174		0.735507	0.876564	0.330257	0.107759	-0.619967
31.4003	-0.544175	-0.13116	0.32912	-0.0262307	-2.1436	-0.857449	1.29492		0.671114	0.747777	0.400504	0.506996	-0.538012
31.5003	-0.157817	-0.367268	0.32912	-0.155017	-1.69285	-0.213518	1.11462		0.671114	0.773535	0.248302	0.635783	-0.479473
31.6003	-0.000411248	-0.28141	0.618889	-0.0906238	-1.95042	-0.149125	0.869922		0.220362	0.773535	0.52929	0.610025	-0.514596
31.7003	0.0854463	-0.174088	0.618889	0.649897	-2.20799	0.0440543	0.547956		-0.101604	0.979593	0.318549	0.713054	-0.491181
31.8003	0.156994	-0.088231	0.747675	0.81088	-1.69285	-0.599877	0.612349		-0.101604	0.773535	0.634661	0.66154	-0.409226
31.9003	0.0568271	-0.217017	0.586692	0.875273	-1.37088	-0.342304	0.560835		-0.359176	0.799292	0.377088	0.313817	-0.268732
32.0003	-0.0576496	-0.410197	0.618889	0.71429	-1.49967	-0.66427	0.535077		-0.681142	0.696263	0.540998	0.107759	-0.198485
32.1003	-0.215055	-0.453125	0.490102	0.392325	-1.11331	-0.213518	0.79265		-0.487963	0.953835	0.494167	0.223667	-0.151653
32.2003	-0.300913	-0.603376	0.425709	0.134752	-0.855739	-0.0847319	0.728257		-0.359176	0.825049	0.763447	0.223667	-0.151653
32.3003	-0.200745	-0.581912	0.425709	0.102556	-1.37088	0.430413	0.921436		-0.874321	1.41747	0.646369	0.300938	-0.245316
32.4003	-0.229365	-0.538983	0.361316	0.0059659	-1.11331	0.430413	0.869922		-0.809928	1.23717	0.798571	0.249424	-0.397518
32.5003	-0.157817	-0.238482	0.651085	0.166949	-0.791346	0.559199	1.15325		-0.681142	0.928078	0.704908	0.494118	-0.397518
32.6003	-0.200745	-0.28141	0.779871	0.456718	-0.147415	0.816772	1.07598		-0.616749	0.670506	0.892233	0.494118	-0.479473
32.7003	-0.0290304	-0.324339	0.908658	0.199145	0.0457646	0.752379	1.30779		-0.809928	0.593234	0.997604	0.635783	-0.584843
32.8003	-0.129198	-0.324339	0.908658	0.134752	0.174551	1.13874	1.26916		-0.552356	0.206875	1.11468	0.519875	-0.538012
32.9003	-0.143507	-0.667769	0.908658	0.199145	0.36773	0.816772	0.985829		-0.0372108	0.618991	1.14981	0.558511	-0.432642
33.0003	-0.186436	-0.903877	0.522299	-0.0584272	0.625303	1.00995	0.79265		-0.294783	1.03111	1.04444	0.28806	-0.608259
33.1003	0.0425175	-0.989735	0.425709	0.166949	0.432123	0.816772	0.805528		0.0915755	1.31444	0.892233	0.37821	-0.54972
33.2003	-0.186436	-0.925342	0.32912	0.199145	0.496516	0.494806	0.895679		0.284755	1.34019	0.58783	0.236545	-0.584843
33.3003	-0.215055	-0.989735	0.23253	0.263538	0.496516	0.172841	0.8828		-0.101604	1.21141	0.178055	0.0948803	-0.655091
33.4003	-0.229365	-0.667769	0.0393505	0.295735	0.303337	0.301627	0.831286		-0.745535	1.21141	0.107808	-0.00814866	-0.795585
33.5003	-0.343841	-0.410197	0.23253	0.649897	0.174551	0.237234	0.960072		-0.101604	1.05686	0.107808	0.223667	-0.491181
33.6003	-0.901915	-0.431661	0.393513	0.488914	0.0457646	-0.0847319	1.01159		-0.616749	0.799292	0.107808	0.0691231	-0.526304
33.7003	-0.672962	-0.517519	0.457906	0.81088	-0.855739	0.430413	0.818407		-0.809928	0.979593	0.236594	0.0176086	-0.362394
33.8003	-0.701581	-0.646305	0.296923	0.649897	-0.791346	0.816772	0.831286		-0.487963	0.928078	0.517583	0.159273	-0.467765
33.9003	-0.472628	-0.732162	0.457906	0.71429	-1.04892	0.430413	0.818407		-0.23039	0.464448	0.646369	0.185031	-0.479473
34.0003	-0.486937	-0.946806	0.490102	0.585504	-0.46938	0.108447	0.844164		-0.42357	0.618991	0.798571	0.0691231	-0.795585
34.1003	-0.0719592	-1.20438	0.425709	0.649897	-0.276201	-0.0847319	0.960072		-0.0372108	1.03111	0.950773	0.107759	-0.678506
34.2003	-0.0719592	-1.0112	0.200333	0.327932	0.432123	-0.66427	1.10174		-0.0372108	1.13414	0.927357	0.300938	-0.643383
34.3003	-0.0719592	-0.839484	0.264726	0.327932	0.56091	-1.37259	1.15325		0.0915755	1.36595	0.845402	0.313817	-0.502889
34.4003	-0.172126	-0.946806	0.103744	0.134752	0.432123	-1.05063	1.25628		-0.101604	1.34019	0.646369	0.275181	-0.315563
34.5003	-0.000411249	-1.24731	0.13594	0.199145	-0.46938	-1.56577	1.05022		0.284755	0.928078	0.599537	0.403967	-0.456057
34.6003	-0.157817	-1.05413	0.200333	-0.155017	-0.920132	-1.24381	0.998708		0.349148	0.670506	0.728324	0.262302	-0.467765
34.7003	-0.186436	-1.22584	0.425709	-0.0262307	-1.30649	-1.11502	0.779771		0.349148	0.567477	0.599537	0.326696	-0.643383
34.8003	-0.257984	-1.46195	0.715478	0.327932	-1.62846	-0.793056	0.573713		0.349148	0.284147	0.845402	0.120638	-0.678506
34.9003	-0.37246	-1.39756	0.908658	0.231342	-1.49967	-1.43699	0.470684		0.477934	0.43869	0.85711	0.146395	-0.655091
35.0004	-0.658652	-1.22584	0.522299	0.199145	-1.43528	-1.11502	0.367655		0.155969	0.953835	0.810279	0.0433658	-0.420934
35.1004	-0.601414	-1.3117	0.23253	0.585504	-1.1777	-0.793056	0.251748		-0.487963	0.773535	0.681492	0.236545	-0.444349
35.2004	-0.7302	-1.50488	0.296923	0.553307	-1.11331	-0.66427	0.277505		-0.359176	1.00535	0.997604	-0.0596632	-0.432642
35.3004	-0.787438	-1.52634	0.361316	0.488914	-0.920132	-0.728663	0.303262		-1.00311	0.953835	1.23176	0.0820017	-0.444349
35.4004	-0.529866	-1.69806	0.23253	0.424521	-0.920132	-0.0203388	0.50932		-1.13189	0.928078	1.55958	0.146395	-0.666798
35.5004	-0.358151	-1.9127	0.296923	0.424521	-0.726953	0.172841	0.573713		-1.19629	0.747777	1.64154	0.275181	-0.783877
35.6004	-0.315222	-1.9771	0.264726	0.263538	-0.855739	-0.471091	0.676742		-1.0675	0.670506	1.31372	0.0691231	-0.889247
35.7004	-0.186436	-1.74099	0.103744	0.392325	-0.726953	-0.471091	0.586592		-1.0675	0.464448	1.22005	-0.111178	-0.900955
35.8004	0.0854463	-1.80538	0.00715393	0.295735	-0.66256	-0.342304	0.483563		-0.294783	0.490205	1.18493	-0.162692	-0.877539
35.9004	-0.172126	-1.65513	-0.186025	0.392325	-0.791346	-0.535484	0.586592		0.0271824	0.284147	0.927357	-0.149814	-0.865832
36.0004	-0.157817	-1.37609	-0.0894358	0.392325	-0.533774	-0.0847319	0.857043		0.0271824	-0.0764548	0.740032	-0.149814	-0.71363
36.1004	-0.300913	-1.24731	-0.0894358	0.424521	-0.46938	0.172841	0.444927		0.0915755	0.129603	0.833694	0.00472996	-0.491181
36.2004	-0.444008	-1.39756	0.00715393	0.295735	-0.276201	0.36602	0.0714468		0.413541	-0.205241	0.669784	0.455482	-0.350687
36.3004	-0.615723	-1.24731	0.0393505	0.134752	-0.66256	-0.0847319	0.0585682		-0.165997	-0.179484	0.0726846	0.275181	-0.327271
36.4004	-0.558485	-1.29024	0.522299	-0.0584272	-0.0186286	0.301627	-0.0830966		-0.294783	0.0780888	-0.0443938	0.416846	-0.257024
36.5004	-0.587104	-1.35463	0.264726	-0.0584272	-0.276201	0.172841	-0.43082		-1.0675	-0.0506975	-0.0678095	0.300938	-0.374102
36.6004	-0.501247	-1.80538	0.200333	-0.12282	-0.920132	0.36602	-0.108854		-1.19629	-0.462814	-0.0678095	0.0562445	-0.596551
36.7004	-0.444008	-2.17028	0.0393505	-0.155017	-0.791346	0.494806	0.316141		-1.71143	-0.102212	0.107808	0.146395	-0.737045
36.8004	-0.486937	-2.2132	-0.218222	-0.0584272	-0.598167	1.00995	0.496441		-1.77583	0.0780888	0.248302	0.313817	-0.819
36.9004	-0.343841	-2.17028	-0.765564	0.0059659	-0.726953	0.752379	0.470684		-1.64704	-0.153727	0.236594	0.365331	-0.912663
37.0004	-0.286603	-2.19174	-0.540188	0.134752	-0.46938	0.237234	0.625228		-0.809928	0.25839	0.154639	0.37821	-0.947787
37.1004	-0.38677	-1.69806	-0.475795	0.231342	-0.147415	0.0440543	0.638106		-0.681142	0.567477	0.119516	0.326696	-0.783877
37.2004	-0.243674	-1.29024	-0.507991	0.263538	-0.726953	-0.149125	0.59947		-0.681142	0.670506	0.236594	0.236545	-0.619967
37.3004	-0.100578	-1.59074	-0.314812	0.263538	-0.791346	-0.342304	0.573713		-0.616749	0.593234	0.42392	0.403967	-0.514596
37.4004	-0.515556	-1.63367	-0.121632	0.488914	-1.2421	-0.342304	0.8828		-0.616749	0.593234	0.517583	0.313817	-0.432642
37.5004	-0.429699	-1.50488	0.0393505	0.070359	-1.62846	0.0440543	1.05022		-1.19629	0.464448	0.6932	0.46836	-0.374102
37.6004	-0.515556	-1.67659	0.200333	-0.187213	-1.56406	0.172841	0.728257		-0.938715	0.464448	0.716616	0.803205	-0.526304
37.7004	-0.687271	-1.84831	0.13594	-0.12282	-1.49967	0.172841	0.650985		-0.359176	0.515962	0.283426	0.519875	-0.678506
37.8004	-0.858986	-1.71952	-0.153829	-0.348196	-0.920132	0.623592	0.50932		0.606721	0.25839	0.224887	0.622904	-0.842416
37.9004	-0.801748	-1.9127	-0.186025	-0.637965	-0.598167	-0.149125	0.0714469		0.542327	0.0780888	0.271718	0.519875	-0.900955
38.0004	-0.887605	-1.89124	-0.153829	-0.283803	-0.726953	-0.277911	-0.121733		1.05747	0.129603	0.330257	0.46836	-0.971202
38.1004	-0.7302	-1.65513	-0.411401	-0.155017	-0.66256	-0.66427	0.0714468		1.18626	0.309904	0.52929	0.429725	-1.18194
38.2004	-0.7302	-1.41902	0.0715471	-0.0906238	-0.791346	-0.599877	0.238869		0.7999	0.284147	0.6932	0.532754	-1.17024
38.3004	-0.801748	-1.46195	0.32912	0.199145	-1.37088	-0.986236	0.354777		0.0915755	0.567477	0.786863	0.545632	-0.994618
38.4004	-0.644343	-1.63367	0.32912	0.360128	-1.49967	-0.149125	0.264626		0.0271824	0.876564	0.868818	0.700176	-1.02974
38.5004	-0.672962	-1.71952	0.13594	0.166949	-0.984525	-0.213518	0.59947		-0.23039	1.10838	1.04444	0.584268	-1.08828
38.6004	-0.615723	-2.14881	0.490102	0.231342	-0.726953	-0.149125	0.380534		-0.165997	0.361419	0.821986	0.584268	-0.748753
38.7004	-0.444008	-2.23467	0.296923	0.231342	-0.726953	-0.213518	0.161597		0.0271824	0.0265743	0.892233	0.674418	-0.655091
38.8004	-0.100578	-2.12735	0.361316	0.070359	-0.66256	0.36602	0.329019		0.0271824	0.103846	0.85711	0.46836	-0.631675
38.9004	0.0997558	-1.82685	0.554496	0.263538	-0.533774	0.36602	0.663864		0.155969	0.0523315	0.798571	0.197909	-0.526304
39.0004	-0.04334	-1.74099	0.522299	0.424521	-0.46938	0.623592	0.264626		0.349148	0.0523315	0.435628	0.0562445	-0.456057
39.1004	0.0854463	-1.52634	0.361316	0.553307	-0.211808	0.494806	0.200233		0.0915755	0.464448	0.576122	0.00472996	-0.596551
39.2004	-0.04334	-1.50488	0.13594	0.360128	-0.0830217	0.172841	0.444927		-0.0372108	0.773535	0.341965	0.0433658	-0.725338
39.3004	-0.172126	-1.59074	-0.218222	0.360128	0.110158	-0.535484	0.341898		-0.23039	0.850806	0.154639	0.185031	-0.994618
39.4004	-0.300913	-1.48342	-0.250419	0.134752	-0.0830217	-0.986236	0.251748		-0.165997	0.593234	0.213179	0.313817	-0.959494
39.5004	-0.272293	-1.78392	-0.314812	-0.155017	-0.46938	-1.05063	0.354777		-0.101604	0.747777	0.412212	0.236545	-0.865832
39.6004	-0.343841	-1.86977	-0.282615	-0.509179	-0.726953	-0.66427	0.560835		-0.487963	0.850806	0.365381	-0.0210273	-0.830708
39.7004	-0.358151	-2.04149	-0.0572392	-0.670162	-0.211808	-0.213518	0.432048		-0.42357	0.773535	0.763447	-0.188449	-0.737045
39.8004	-0.415389	-1.82685	0.13594	-0.541376	-0.0830217	0.0440543	0.432048		0.477934	0.850806	0.821986	-0.407386	-0.71363
39.9004	-0.630033	-2.19174	0.00715393	-0.412589	-0.0830217	0.559199	0.650985		0.155969	1.03111	0.564414	-0.355872	-0.701922
40.0004	-0.544175	-2.04149	-0.0250426	-0.380393	-0.404987	0.36602	0.934315		0.0915755	0.825049	0.470751	-0.188449	-0.737045
40.1004	-0.773129	-2.10588	-0.0250426	-0.12282	-0.920132	0.430413	1.20477		0.349148	0.618991	0.459043	0.00472996	-0.842416
40.2004	-0.7302	-1.86977	-0.153829	-0.12282	-0.726953	-0.0203388	1.20477		0.0271824	0.618991	0.377088	-0.00814866	-1.00633
40.3004	-0.787438	-1.95563	-0.121632	-0.476983	-0.46938	-0.0203388	0.960072		-0.42357	0.155361	0.26001	0.0562445	-0.783877
40.4004	-0.601414	-1.84831	-0.347008	-0.187213	0.110158	-0.277911	0.560835		0.0915755	0.103846	0.599537	0.236545	-0.819
40.5004	-0.529866	-1.93417	-0.379205	0.166949	0.689696	0.0440543	0.496441		0.0271824	0.0780888	0.845402	0.236545	-0.865832
40.6004	-0.286603	-1.78392	-0.0572392	-0.0584272	1.07605	-0.0203388	0.41917		-0.0372108	0.206875	0.903941	0.197909	-0.854124
40.7004	-0.329532	-1.78392	-0.153829	0.166949	1.01166	0.108447	0.406291		0.0271824	-0.0249402	0.939065	0.275181	-0.678506
40.8004	-0.0862688	-2.02002	-0.282615	0.295735	0.496516	-0.277911	0.586592		-0.487963	0.284147	1.07956	0.185031	-0.819
40.9004	-0.172126	-1.80538	-0.0572392	-0.0906238	0.0457646	-0.66427	0.805528		-0.616749	0.490205	1.02102	-0.175571	-0.854124
41.0004	-0.429699	-1.71952	-0.0250426	-0.412589	-0.404987	-0.599877	0.50932		-0.938715	0.541719	0.892233	-0.317236	-0.760461
41.1004	-0.143507	-1.65513	-0.379205	-0.348196	-0.66256	-0.986236	0.354777		-1.13189	1.05686	0.96248	-0.446022	-0.631675
41.2004	-0.186436	-1.93417	-0.0894358	-0.251607	-0.726953	-0.406698	0.457806		-0.809928	1.21141	0.880526	-0.523294	-0.678506
41.3004	-0.38677	-1.67659	0.296923	-0.444786	-0.533774	-0.471091	0.238869		-0.552356	1.13414	0.927357	-0.458901	-0.666798
41.4004	-0.257984	-1.82685	0.490102	-0.412589	-0.920132	-0.149125	0.0714469		-0.809928	0.902321	0.96248	-0.265721	-0.772169
41.5004	-0.129198	-1.76245	0.715478	-0.348196	-0.404987	-0.535484	0.0972041		-0.294783	0.72202	1.00931	-0.175571	-0.795585
41.6004	-0.429699	-1.74099	0.876461	-0.541376	-0.211808	0.237234	0.00705373		0.0915755	0.387176	0.903941	0.0820017	-0.912663
41.7004	-0.229365	-1.74099	0.490102	-0.766752	-0.340594	0.108447	0.00705372		-0.165997	0.464448	0.786863	0.107759	-0.889247
41.8004	-0.114888	-1.95563	0.296923	-0.412589	-0.855739	0.108447	0.290383		0.0271824	0.747777	0.903941	0.210788	-0.924371
41.9004	-0.172126	-1.71952	0.103744	-0.541376	-1.37088	0.0440543	0.380534		0.0271824	0.902321	0.997604	0.0433658	-0.807292
42.0004	-0.000411251	-2.04149	-0.153829	-0.670162	-1.69285	0.0440543	0.650985		-0.165997	0.979593	0.96248	0.185031	-0.877539
42.1004	-0.04334	-2.36345	-0.475795	-0.348196	-1.88603	-0.728663	0.869922		-0.165997	1.00535	0.985896	-0.124056	-0.900955
42.2004	-0.114888	-2.23467	-0.347008	-0.155017	-2.07921	-0.793056	0.625228		-0.101604	1.21141	0.96248	-0.124056	-0.936079
42.3004	0.0138983	-1.93417	-0.443598	-0.251607	-2.07921	-0.471091	0.535077		0.155969	0.902321	0.658077	-0.0725418	-0.830708
42.4004	0.114065	-2.49224	-0.314812	-0.283803	-1.88603	-0.277911	0.663864		0.284755	1.18565	0.482459	-0.239964	-0.854124
42.5004	-0.0862688	-2.36345	-0.0894358	-0.0262307	-2.27239	-0.471091	0.715378		0.349148	1.52049	0.482459	-0.394507	-0.877539
42.6004	-0.186436	-2.36345	0.168137	-0.155017	-2.33678	-0.0847319	0.560835		-0.23039	1.57201	0.306841	-0.252843	-0.830708
42.7004	-0.100578	-2.55663	0.425709	-0.283803	-2.01482	-0.599877	0.663864		0.155969	1.21141	0.224886	-0.227085	-0.760461
42.8004	-0.286603	-2.79274	0.425709	-0.0584272	-1.95042	-0.599877	0.432048		-0.42357	1.46898	0.412212	-0.574808	-0.854124
42.9004	-0.486937	-2.59956	0.361316	0.070359	-1.56406	-0.728663	0.00705372		-0.552356	1.36595	0.248302	-0.265721	-0.877539
43.0004	-0.444008	-2.40638	0.296923	-0.0262307	-1.30649	-0.66427	-0.456577		-0.359176	1.05686	0.166347	-0.136935	-0.760461
43.1004	-0.672962	-2.42785	0.00715393	-0.12282	-0.855739	-0.471091	-0.765664		-0.101604	0.644748	0.201471	0.133516	-0.71363
43.2004	-0.7302	-2.12735	0.13594	-0.0906238	-1.1777	-0.471091	-0.701271		-0.745535	0.773535	0.271718	0.00472996	-0.795585
43.3004	-0.630033	-2.02002	0.13594	-0.348196	-0.791346	-0.921843	-0.443698		-0.616749	0.72202	0.505875	0.146395	-0.865832
43.4004	-0.572795	-1.89124	-0.0572392	-0.670162	-0.920132	-0.921843	-0.43082		-0.552356	0.696263	0.704908	0.146395	-0.865832
43.5004	-0.40108	-2.10588	-0.218222	-0.734555	-0.598167	-0.857449	-0.302033		-1.19629	0.567477	0.821986	0.146395	-1.00633
43.6004	-0.000411249	-1.89124	-0.0894358	-0.316	-0.984525	-1.11502	0.187354		-0.294783	0.72202	0.985896	0.0176086	-1.07657
43.7004	-0.186436	-1.99856	-0.507991	-0.316	-0.791346	-0.728663	0.22599		-0.101604	0.773535	0.985896	0.0820017	-1.09999
43.8004	-0.40108	-2.2132	-0.411401	-0.0584272	-0.984525	-0.0203388	0.251748		0.0271824	0.850806	0.599537	0.197909	-0.947787
43.9004	-0.501247	-2.34199	0.0393505	0.070359	-0.855739	0.36602	0.535077		-0.101604	0.72202	0.318549	0.0562445	-0.830708
44.0004	-0.687271	-2.25613	0.168137	0.456718	-1.11331	0.237234	0.715378		-0.0372108	0.825049	-0.138057	0.0176086	-0.71363
44.1004	-0.844677	-2.51371	-0.0894358	0.070359	-0.920132	-0.0203388	0.432048		-0.487963	0.644748	-0.243427	-0.0339059	-0.737045
44.2004	-0.71589	-2.66396	-0.153829	0.102556	-1.04892	0.0440543	0.341898		-0.0372108	0.799292	-0.372213	0.159273	-0.71363
44.3004	-0.558485	-2.47078	-0.282615	-0.0906238	-0.66256	-0.535484	0.213112		-0.359176	0.593234	-0.33709	-0.214207	-0.842416
44.4004	-0.515556	-2.55663	-0.70117	0.649897	-0.147415	-0.535484	0.174476		-0.681142	0.155361	-0.266843	0.00472996	-0.959494
44.5004	-0.601414	-2.68542	-0.604581	0.424521	-0.533774	-0.0203388	0.032811		-0.552356	-0.0764547	0.166347	-0.0210273	-1.05316
44.6004	-0.515556	-2.40638	-0.507991	0.521111	-0.404987	-0.0847319	0.264626		-0.809928	0.155361	0.224887	-0.291478	-1.01803
44.7004	-0.572795	-2.49224	-0.282615	0.456718	-0.920132	-0.342304	0.612349		-1.00311	-0.127969	0.611245	-0.56193	-0.830708
44.8004	-0.758819	-2.62103	-0.347008	0.166949	-1.49967	-0.277911	0.818407		-0.938715	0.0523315	0.821986	-0.265721	-0.619967
44.9004	-0.801748	-2.77128	-0.443598	-0.573572	-2.33678	-0.535484	1.03734		-0.42357	0.593234	1.00931	-0.330114	-0.467765
45.0005	-0.787438	-2.66396	-0.733367	-0.831145	-1.95042	-1.17942	1.16613		-0.23039	0.799292	1.03273	-0.446022	-0.54972
45.1005	-0.644343	-2.53517	-0.79776	-0.670162	-1.88603	-0.857449	1.14037		-0.616749	0.850806	1.00931	-0.291478	-0.479473
45.2005	-0.658652	-2.2776	-1.11973	-0.831145	-1.37088	-0.793056	0.741135		-0.809928	0.850806	0.903941	-0.227085	-0.608259
45.3005	-0.501247	-2.2132	-1.57048	-0.637965	-0.855739	-1.24381	0.741135		-0.487963	0.953835	0.552706	-0.0467845	-0.865832
45.4005	-0.444008	-1.78392	-1.92464	-0.380393	0.110158	-0.921843	0.650985		-0.165997	0.799292	0.447335	-0.0854204	-1.1234
45.5005	-0.358151	-1.46195	-2.24661	-0.12282	0.625303	-0.921843	0.573713		0.0271824	1.03111	0.42392	-0.098299	-1.24048
45.6005	-0.486937	-1.54781	-2.43978	-0.348196	0.625303	-1.17942	0.483563		0.0915755	0.928078	0.330257	0.0433658	-1.38098
45.7005	-0.415389	-1.67659	-3.05152	0.166949	0.496516	-1.43699	0.50932		0.155969	1.08262	0.154639	0.0948803	-1.77904
45.8005	-0.501247	-1.65513	-3.34129	0.102556	-0.147415	-0.921843	0.522199		0.0915755	0.72202	0.388796	0.0820017	-2.00149
45.9005	-0.429699	-1.67659	-3.85643	-0.0906238	-0.66256	-1.56577	0.650985		0.155969	0.850806	0.248302	-0.111178	-2.35273
46.0005	-0.429699	-1.95563	-4.2106	-0.12282	-1.43528	-1.50138	1.0631		-0.487963	0.902321	0.119516	-0.149814	-2.62201
46.1005	-0.615723	-2.17028	-4.50037	0.0059659	-1.37088	-1.95213	1.26916		-0.165997	0.773535	-0.0209782	-0.227085	-3.13715
46.2005	-0.830367	-2.12735	-4.1784	-0.605769	-1.11331	-2.33849	1.37219		0.477934	0.567477	0.131224	-0.0854204	-3.57034
46.3005	-1.11656	-2.29906	-4.37158	-0.412589	-0.984525	-3.1756	1.10174		0.349148	0.490205	-0.184888	-0.265721	-4.14403
46.4005	-1.11656	-2.66396	-4.11401	-0.380393	-1.37088	-4.01271	1.05022		-0.294783	0.670506	-0.255135	-0.252843	-4.64746
46.5005	-0.816058	-3.24349	-3.88863	-0.605769	-1.04892	-4.97861	0.483563		0.284755	0.515962	-0.77028	-0.111178	-5.11578
46.6005	-0.630033	-3.45814	-4.11401	-0.509179	-1.82164	-5.62254	0.187354		0.0915755	0.799292	-1.27372	-0.36875	-5.66605
46.7005	-0.615723	-3.80157	-4.59695	-0.380393	-2.85193	-7.10358	0.316141		-0.874321	1.05686	-2.03473	-0.65208	-6.30998
46.8005	-0.143507	-3.97328	-4.37158	-0.798948	-3.88222	-8.26266	0.406291		-2.54854	1.13414	-2.66695	-0.65208	-6.83683
46.9005	-0.343841	-4.57429	-4.50036	-1.18531	-4.9769	-9.29295	0.174476		-3.96519	0.979593	-3.6387	-0.394507	-7.46905
47.0005	-1.05932	-5.00357	-4.95112	-1.60386	-6.8443	-10.6452	0.213112		-6.60531	0.747777	-4.5402	-0.536172	-8.34714
47.1005	-1.60308	-6.11972	-5.0799	-2.82733	-8.84049	-12.255	0.13584		-9.76057	0.206875	-5.86319	-0.832381	-9.3306
47.2005	-2.33287	-7.19294	-5.20869	-3.56785	-11.0299	-13.4141	-0.250519		-13.6242	-0.437056	-7.45546	-1.3604	-10.2672
47.3005	-3.44902	-8.58812	-5.72383	-4.82352	-12.8973	-14.5732	-0.778542		-16.2643	-1.02947	-8.90723	-2.06873	-11.1804
47.4005	-4.35052	-9.48963	-6.27118	-6.04699	-15.4086	-15.9254	-1.29369		-19.8059	-1.57038	-10.5815	-3.4725	-12.3395
47.5005	-5.42374	-10.5843	-6.81852	-7.30265	-18.4351	-16.9557	-2.22095		-23.0256	-1.77643	-12.4313	-4.99218	-13.4635
47.6005	-6.89763	-11.6361	-7.49465	-8.17196	-21.1396	-18.3724	-3.22548		-26.052	-2.05976	-14.1758	-6.61488	-14.5172
47.7005	-8.58616	-12.559	-8.75031	-9.6852	-23.6509	-18.9519	-4.64213		-28.8209	-2.70369	-15.9553	-8.3535	-15.7582
47.8005	-10.8185	-13.2888	-9.97378	-10.6833	-27.1925	-20.0466	-6.03302		-31.4611	-3.75974	-17.8871	-10.633	-17.0344
47.9005	-13.7662	-14.083	-11.2616	-11.8102	-30.4122	-21.3989	-7.81027		-33.586	-5.58851	-19.9711	-12.9383	-18.1349
48.0005	-16.3563	-14.7269	-12.7105	-13.3556	-33.4387	-22.3004	-9.38146		-35.4534	-7.80363	-21.5634	-15.089	-19.3174
48.1005	-19.2754	-15.3279	-13.934	-14.8366	-35.95	-23.0087	-11.2746		-37.7072	-10.096	-23.2493	-17.2913	-20.2657
48.2005	-22.5666	-16.1436	-14.8999	-16.0923	-39.0409	-24.039	-13.1678		-38.9951	-13.1611	-24.7479	-19.5708	-20.8979
48.3005	-25.6861	-17.1524	-16.2521	-17.187	-41.2302	-24.5541	-15.1382		-40.9912	-15.9172	-26.3051	-21.7215	-21.8697
48.4005	-28.3048	-18.011	-17.9263	-18.2173	-43.2908	-25.1981	-17.2117		-42.7942	-18.5444	-27.3471	-23.8851	-22.6775
48.5005	-31.6246	-18.891	-19.0532	-18.668	-45.0294	-26.0352	-19.5298		-44.0821	-21.455	-28.7403	-25.8427	-23.2981
48.6005	-34.0572	-19.5779	-20.4055	-19.5695	-47.0256	-26.0996	-21.7321		-44.4041	-24.3398	-29.5247	-27.6586	-23.9888
48.7005	-35.803	-20.5438	-21.468	-19.8915	-48.9574	-26.6791	-23.8442		-45.2412	-26.2973	-30.5316	-29.3843	-24.5859
48.8005	-37.5201	-21.1877	-22.1763	-20.9218	-50.3097	-26.8079	-26.0593		-45.7563	-28.3837	-31.0936	-30.8911	-24.7147
48.9005	-38.9368	-22.0248	-22.5626	-21.5013	-51.7907	-26.4215	-28.0297		-46.4003	-30.264	-31.7375	-31.9858	-25.1596
49.0005	-39.6952	-22.8619	-23.11	-22.3063	-52.0483	-26.3571	-29.7168		-47.2374	-32.2215	-32.1941	-33.0547	-25.546
49.1005	-40.7255	-23.6347	-23.9793	-22.6604	-52.8854	-26.8079	-30.8759		-48.2033	-33.7927	-32.6507	-34.1107	-25.663
49.2005	-41.4839	-23.9352	-24.8808	-22.9502	-53.5293	-26.8723	-31.6486		-48.7828	-35.5442	-32.8615	-34.9736	-25.9909
49.3005	-42.1135	-24.4074	-25.4281	-22.757	-53.6581	-27.1942	-32.2024		-49.298	-37.2442	-33.3649	-35.4244	-26.307
49.4005	-42.4426	-24.3859	-25.5891	-22.6604	-53.0786	-27.2586	-32.2668		-48.7828	-38.4032	-33.3532	-35.5789	-26.3187
49.5005	-43.0723	-24.7079	-26.3618	-22.8214	-54.3664	-27.7094	-32.885		-49.0404	-39.5108	-33.7513	-36.313	-26.5997
49.6005	-43.5445	-25.0942	-26.5872	-22.9502	-54.946	-28.1601	-33.3743		-49.1692	-40.5411	-34.3132	-36.6092	-27.0211
49.7005	-44.217	-25.7167	-26.716	-23.1434	-55.0104	-28.1601	-34.3145		-49.7487	-41.3653	-34.7347	-36.9312	-27.5129
49.8005	-44.446	-25.9528	-26.9414	-23.4009	-55.5899	-28.2245	-34.6622		-49.3623	-41.4426	-35.0157	-37.3304	-27.9109
49.9005	-44.8896	-26.6611	-27.5531	-23.8839	-56.0406	-28.9329	-35.4478		-50.1995	-42.3183	-35.5777	-37.8069	-28.2153
50.0005	-44.5891	-26.2962	-27.1024	-23.24	-55.3967	-28.4177	-34.8554		-49.8775	-42.035	-35.2147	-37.3433	-27.8407
50.1005	-44.2886	-25.8884	-26.8126	-23.0468	-55.2035	-27.8382	-34.5721		-49.6199	-41.829	-34.6645	-36.9569	-27.7587
50.2005	-43.7305	-25.3089	-26.2652	-23.24	-53.9801	-27.9026	-33.7221		-48.7184	-41.0562	-34.161	-36.7251	-27.3958
50.3005	-43.4872	-24.9654	-25.9111	-22.7892	-53.8513	-28.4177	-33.3486		-48.976	-40.7472	-33.8449	-36.5319	-27.0446
50.4005	-42.829	-24.4288	-25.3637	-22.4672	-53.5293	-28.2245	-32.8592		-48.654	-39.8456	-33.283	-36.21	-26.9977
50.5005	-42.4999	-24.4503	-25.3637	-22.7248	-53.5937	-28.2245	-33.194		-48.654	-39.382	-33.119	-36.0812	-27.2904
50.6005	-41.9847	-24.2142	-25.1384	-22.4028	-53.143	-28.3533	-32.9365		-48.0745	-39.1502	-32.9434	-36.0683	-27.2319
50.7005	-41.999	-24.0425	-24.9452	-22.1453	-53.2073	-28.2889	-32.8334		-47.8813	-38.7896	-32.6507	-35.6691	-27.0094
50.8005	-41.6413	-23.8708	-25.074	-21.9843	-52.3702	-27.4518	-32.4342		-47.4306	-38.1457	-32.2995	-35.3986	-27.0446
50.9005	-41.5125	-23.5917	-25.0418	-21.9199	-51.9195	-26.9367	-31.816		-46.6578	-37.8881	-32.2527	-35.1797	-26.8572
51.0005	-41.6556	-23.4415	-24.8486	-21.5657	-51.5975	-27.0011	-31.1206		-45.8851	-37.579	-32.0419	-35.1282	-26.6582
51.1005	-41.4553	-23.5703	-24.913	-21.7267	-51.0824	-26.9367	-30.9403		-45.7563	-36.9351	-32.0302	-34.7547	-26.5763
51.2005	-40.9544	-23.3985	-25.2028	-21.5657	-50.8892	-26.5503	-30.438		-45.1124	-36.7033	-32.1005	-34.6903	-26.5411
51.3005	-40.4536	-23.2912	-25.0418	-21.7589	-51.018	-26.9367	-30.3221		-44.2753	-36.729	-31.7258	-34.3812	-26.5177
51.4005	-40.0386	-23.5059	-24.8164	-21.3726	-50.8892	-26.7435	-30.2577		-43.8889	-36.3169	-31.4565	-34.2395	-26.4123
51.5005	-39.409	-23.3771	-24.7842	-21.2116	-50.2453	-27.0655	-29.8198		-43.6314	-36.1108	-31.2341	-33.8145	-26.225
51.6005	-38.9368	-22.6473	-24.591	-20.7286	-50.1165	-26.6147	-29.2918		-42.9874	-35.673	-30.7306	-33.8145	-26.1196
51.7005	-38.3215	-22.497	-24.0115	-20.4067	-50.0521	-26.7435	-28.8797		-43.0518	-35.4927	-30.4145	-33.3123	-26.3772
51.8005	-38.0496	-22.1321	-23.8505	-19.8915	-49.4082	-26.5503	-28.4933		-43.1162	-34.9775	-30.3677	-33.2994	-26.1314
51.9005	-37.4772	-21.6385	-23.4319	-19.8271	-49.4725	-26.6791	-27.8752		-43.1162	-34.5912	-30.0516	-32.9774	-26.026
52.0005	-37.0909	-21.5955	-23.1744	-19.9881	-49.215	-26.1639	-27.8237		-42.3435	-34.1018	-29.6769	-32.6555	-25.7918
52.1005	-36.7474	-22.1107	-22.6914	-20.4067	-48.8286	-26.2283	-27.6691		-42.2147	-33.7412	-29.4779	-32.3721	-25.7216
52.2005	-36.1464	-22.0892	-22.9168	-20.3101	-48.5067	-25.7776	-27.6176		-41.3776	-33.2518	-29.1033	-32.1274	-25.3001
52.3005	-35.4739	-21.9819	-22.7558	-20.4067	-48.3779	-25.6488	-27.3214		-40.6693	-33.0715	-28.5413	-31.7797	-25.4406
52.4005	-35.1018	-21.7887	-22.6592	-20.3745	-47.9271	-25.2624	-27.154		-40.0253	-32.7624	-28.1549	-31.3805	-25.265
52.5005	-34.4722	-21.295	-22.7236	-20.2457	-47.8627	-25.5844	-26.7032		-39.9609	-32.4533	-27.9442	-31.3805	-25.3821
52.6005	-33.9714	-20.6726	-22.4982	-19.2476	-47.4764	-25.52	-26.1366		-39.639	-32.4018	-27.511	-30.7365	-25.4406
52.7005	-33.7567	-20.4365	-22.2085	-19.2798	-47.3476	-25.4556	-25.879		-39.5746	-31.8867	-26.9256	-30.685	-25.3938
52.8005	-33.2845	-20.2647	-21.9831	-18.99	-46.8324	-24.7473	-25.5957		-39.1882	-31.0882	-26.5158	-30.3888	-25.2416
52.9005	-32.9697	-20.2218	-21.9831	-18.829	-46.3173	-24.9405	-25.2608		-38.5443	-30.7018	-26.2114	-30.26	-25.1011
53.0005	-32.798	-20.5438	-21.6289	-18.6036	-45.8021	-24.3609	-24.8229		-37.9648	-30.2897	-25.6143	-29.951	-25.0308
53.1005	-32.4402	-20.4579	-21.8221	-18.7002	-46.0597	-24.1678	-24.9517		-37.9004	-29.62	-25.3919	-29.8994	-24.8903
53.2005	-32.0396	-20.2433	-21.6611	-18.3783	-45.6734	-24.039	-24.5782		-37.1277	-29.4912	-25.3216	-29.4873	-24.9489
53.3005	-31.8249	-20.2433	-21.1782	-18.1529	-45.6734	-24.2965	-23.9987		-36.8701	-28.9246	-25.2865	-29.1782	-24.9254
53.4005	-31.3384	-19.6852	-21.2104	-17.8309	-45.5446	-24.4897	-23.6639		-36.8701	-28.3579	-24.7128	-28.9851	-24.9606
53.5005	-30.7946	-18.934	-21.0494	-17.509	-45.3514	-24.5541	-23.3934		-36.9345	-28.1261	-24.5372	-28.7532	-25.0308
53.6005	-30.4083	-19.0413	-20.7596	-17.3158	-44.9006	-24.2322	-22.8783		-35.9686	-27.5337	-24.2913	-28.6116	-24.9606
53.7005	-30.2795	-18.7408	-20.6308	-17.2836	-44.5787	-24.4253	-22.3889		-35.711	-26.7352	-23.9869	-28.1866	-24.6796
53.8005	-29.6928	-18.5691	-20.8562	-17.3802	-44.4499	-24.2322	-22.2343		-35.0027	-27.1731	-23.6942	-27.7101	-24.6327
53.9005	-29.5926	-18.934	-20.2767	-17.3158	-44.8362	-23.7814	-22.4275		-34.2944	-27.0443	-23.7294	-27.2207	-24.4923
54.0005	-29.2492	-19.0198	-19.7937	-17.4446	-44.8362	-23.4594	-22.3374		-33.908	-26.4519	-23.5186	-27.1177	-24.2698
54.1005	-29.0489	-18.8266	-19.504	-17.3158	-44.2567	-23.4594	-22.1442		-33.4572	-26.117	-23.3781	-26.7828	-24.1996
54.2005	-28.362	-18.7408	-19.2142	-17.187	-44.0635	-23.6526	-21.9896		-33.8436	-26.014	-23.1088	-26.7055	-24.2698
54.3005	-28.1903	-18.4188	-19.021	-17.0582	-43.7416	-23.3307	-21.9381		-33.9724	-25.6019	-22.7108	-26.448	-24.1761
54.4005	-27.9756	-18.4188	-19.182	-16.2533	-43.2264	-22.9443	-21.3586		-34.2944	-24.958	-22.6639	-26.5252	-24.2464
54.5005	-27.6179	-18.2471	-19.3108	-16.0279	-43.0332	-22.6867	-20.8048		-33.7148	-24.4943	-22.7108	-25.8555	-24.3986
54.6005	-27.0885	-18.0539	-19.4396	-16.2533	-42.7113	-22.8155	-20.4828		-33.6504	-24.2883	-22.582	-25.5722	-24.1293
54.7005	-26.9024	-17.9466	-19.5362	-16.0923	-42.1317	-22.3004	-20.4313		-33.1997	-24.0822	-22.4415	-25.4177	-23.942
54.8005	-26.5447	-18.1183	-19.504	-15.8991	-42.1317	-22.5579	-20.1222		-32.8777	-23.5413	-22.5	-25.3662	-23.7898
54.9005	-26.0152	-17.7319	-19.1176	-16.5431	-41.6166	-22.6867	-20.1866		-32.2338	-24.1595	-21.9849	-25.0571	-23.7664
55.0006	-25.729	-17.7105	-19.1498	-16.5431	-41.037	-22.8155	-20.1351		-31.7186	-23.8762	-21.5166	-25.1987	-23.4385
55.1006	-25.6432	-17.3241	-19.2464	-16.3499	-41.2946	-22.4935	-20.1222		-31.3323	-23.9534	-21.177	-24.8253	-23.3917
55.2006	-25.2139	-17.3456	-19.0532	-16.1567	-41.4878	-22.5579	-20.1738		-30.6239	-23.4383	-20.8024	-24.5291	-23.3332
55.3006	-24.942	-17.0022	-18.8278	-15.8669	-41.1658	-22.3648	-20.0965		-30.1732	-23.2837	-20.7087	-24.2328	-23.0522
55.4006	-24.5986	-16.7875	-19.4074	-15.7704	-41.1658	-22.6223	-19.6328		-29.658	-22.1504	-20.8258	-23.8465	-22.7946
55.5006	-24.4841	-16.3582	-19.4396	-15.706	-41.1658	-22.6223	-19.7101		-29.8512	-21.8413	-20.9897	-23.5889	-22.9351
55.6006	-24.0834	-16.3797	-19.1176	-15.2552	-40.6507	-22.3648	-19.5556		-30.0444	-21.5838	-20.7087	-23.6791	-22.8532
55.7006	-23.9976	-16.0577	-19.0532	-15.062	-40.3287	-22.1072	-19.2336		-29.8512	-21.5322	-20.7439	-23.5116	-22.8063
55.8006	-23.8259	-15.8002	-18.9566	-15.2552	-40.5863	-22.236	-18.9889		-29.5293	-21.4035	-20.3926	-23.3442	-22.8063
55.9006	-23.4109	-15.4353	-18.3771	-15.0942	-40.2643	-21.4633	-18.9116		-29.2073	-21.2232	-20.0765	-23.1124	-22.8883
56.0006	-23.1962	-15.4353	-17.9585	-14.8045	-39.7492	-21.1413	-19.0533		-28.9497	-21.1974	-19.5379	-22.7904	-22.6073
56.1006	-22.8957	-15.3279	-17.8619	-14.901	-39.8136	-20.9481	-19.0533		-27.9838	-20.7853	-19.2453	-22.4813	-22.6424
56.2006	-22.8385	-15.3279	-17.8941	-14.8366	-39.7492	-20.8193	-18.5897		-27.9838	-20.811	-18.8004	-22.3654	-22.5605
56.3006	-22.6382	-15.2421	-17.8941	-14.3859	-38.7189	-20.433	-18.448		-27.7906	-20.3732	-18.6247	-22.4813	-22.4083
56.4006	-22.6239	-15.2421	-17.8941	-14.4503	-38.4613	-20.6905	-18.2162		-27.5975	-19.9611	-18.2735	-22.4041	-22.139
56.5006	-22.2947	-15.6284	-17.6366	-14.1605	-38.2681	-20.6261	-17.7783		-27.2755	-19.9095	-18.0511	-22.2109	-22.1039
56.6006	-22.1803	-15.5855	-17.5078	-14.3537	-37.753	-20.6905	-17.4692		-27.0179	-19.5489	-17.8169	-21.9018	-22.0687
56.7006	-21.6508	-15.3923	-17.1858	-14.2249	-37.8818	-21.0125	-17.3276		-26.1808	-18.905	-17.7115	-21.6314	-21.9985
56.8006	-21.2931	-15.4138	-16.7995	-14.3537	-37.9462	-20.7549	-17.1859		-25.7945	-18.6474	-17.4188	-21.0518	-22.0687
56.9006	-21.0784	-15.3279	-16.6385	-14.2249	-37.753	-20.6261	-16.6965		-25.0217	-18.6989	-17.4071	-20.8458	-21.9985
57.0006	-20.6062	-14.8772	-16.7995	-14.1605	-37.8174	-20.433	-16.0268		-25.2793	-18.4671	-17.454	-20.8329	-21.8346
57.1006	-20.549	-14.6196	-16.3809	-13.7742	-37.6242	-20.5617	-15.7564		-25.1505	-18.1323	-17.2549	-20.4852	-21.6121
57.2006	-20.5633	-14.5552	-16.4131	-13.581	-36.7227	-19.8534	-15.8079		-24.893	-18.1065	-17.1144	-20.189	-21.5068
57.3006	-20.3486	-14.5767	-16.7351	-13.4844	-36.3364	-20.0466	-15.4731		-24.4422	-17.9262	-16.9388	-19.8412	-21.378
57.4006	-20.32	-14.4694	-16.4453	-13.259	-36.4007	-19.789	-15.3314		-25.1505	-18.0035	-16.611	-19.6352	-21.3663
57.5006	-20.1769	-14.1045	-16.2843	-13.3878	-36.7871	-20.111	-15.2284		-24.3134	-17.6429	-16.0958	-19.2617	-21.378
57.6006	-20.1197	-14.1045	-16.1555	-13.1302	-37.3022	-19.8534	-14.6875		-24.5066	-17.5141	-15.9202	-19.2231	-21.1438
57.7006	-19.948	-13.9971	-15.7048	-13.3878	-37.3022	-19.9178	-14.3269		-24.8286	-17.205	-15.9436	-19.017	-21.0736
57.8006	-20.0768	-13.761	-15.1252	-13.2912	-37.2379	-19.5315	-14.2109		-24.6998	-17.205	-15.7563	-19.0685	-21.1438
57.9006	-19.6761	-13.7181	-14.8999	-13.0658	-36.4651	-19.4027	-14.1594		-24.0558	-16.8444	-15.4168	-18.7594	-21.1789
58.0006	-19.533	-13.7181	-14.8677	-12.9371	-35.628	-18.9519	-14.0564		-24.0558	-16.6384	-15.1709	-18.6564	-21.0619
58.1006	-18.9892	-13.203	-14.9642	-13.259	-35.1129	-19.0163	-14.1594		-23.7983	-16.4323	-14.9016	-18.7208	-20.9331
58.2006	-18.9034	-13.0956	-15.1252	-13.0014	-34.7909	-19.4671	-14.0306		-23.1543	-16.149	-14.3865	-18.7079	-20.8862
58.3006	-18.6744	-12.9239	-15.4794	-12.6473	-34.7265	-19.2095	-14.1466		-24.0558	-15.3247	-14.246	-18.5276	-20.7223
58.4006	-18.4025	-12.28	-15.8014	-12.7439	-35.0485	-18.8231	-14.4041		-24.249	-14.9126	-14.2577	-18.5405	-20.4296
58.5006	-18.2165	-12.2156	-15.4472	-12.3897	-35.2417	-18.7587	-14.417		-23.6695	-14.9641	-14.4099	-18.1928	-20.4062
58.6006	-18.3739	-12.1297	-15.254	-12.1643	-34.7909	-18.7587	-14.2109		-23.0256	-14.5005	-14.6207	-17.8064	-20.5818
58.7006	-17.8874	-12.0439	-14.9321	-12.1643	-35.0485	-18.0504	-13.8375		-23.4763	-14.5263	-14.5855	-17.8064	-20.617
58.8006	-17.3007	-12.1512	-13.934	-12.4863	-34.6621	-18.308	-13.3481		-22.446	-14.7581	-14.4685	-17.6905	-20.4765
58.9006	-17.4152	-12.559	-13.3866	-12.3253	-34.147	-18.0504	-13.4254		-22.446	-14.3975	-14.4802	-17.5875	-20.4296
59.0006	-17.3866	-12.4302	-13.0003	-12.3253	-33.1811	-17.6641	-13.7344		-22.3172	-14.2429	-14.3865	-17.6776	-20.2189
59.1006	-17.0717	-12.3444	-12.7749	-12.1321	-32.7947	-17.1489	-14.0178		-22.1884	-14.5005	-14.1289	-17.5875	-20.1955
59.2006	-16.9573	-12.1512	-12.7105	-11.9712	-32.344	-17.4065	-14.3784		-21.2869	-14.6035	-14.0938	-17.1496	-19.9613
59.3006	-17.1147	-11.5287	-13.1934	-11.617	-32.0864	-17.4709	-14.6102		-20.8362	-14.4748	-14.0821	-16.9693	-20.0082
59.4006	-16.6711	-11.4644	-13.0647	-11.4882	-32.4728	-17.6641	-14.2625		-20.1923	-14.5778	-13.8831	-16.8405	-20.1604
59.5006	-16.5709	-11.357	-13.4832	-11.295	-32.5372	-17.986	-13.9276		-20.0635	-14.1142	-14.0001	-16.6473	-20.1252
59.6006	-16.2418	-11.4214	-13.4188	-11.2628	-32.4084	-18.2436	-13.5413		-19.8703	-13.7793	-13.8011	-16.6087	-19.8325
59.7006	-16.299	-11.4	-13.3544	-11.6492	-32.1508	-17.5997	-13.1678		-20.1279	-13.4445	-13.8479	-16.5829	-19.7623
59.8006	-16.1416	-11.7434	-13.1612	-11.4238	-32.022	-17.2133	-13.039		-20.0635	-13.702	-13.6489	-16.7117	-19.6569
59.9006	-16.0701	-11.4214	-13.2256	-11.4238	-31.7	-17.4065	-13.1549		-19.2908	-13.7793	-13.4733	-16.261	-19.3993
60.0006	-15.8268	-11.0136	-12.7427	-11.5526	-31.8288	-17.2777	-13.361		-19.2908	-13.8308	-13.0986	-16.2352	-19.3759
60.1006	-15.9556	-10.9063	-12.7105	-11.5204	-31.1849	-17.6641	-13.5799		-19.4839	-13.6763	-13.0869	-15.8489	-19.3642
60.2006	-15.884	-10.6916	-12.5495	-10.8443	-31.3137	-17.7284	-13.889		-19.4195	-13.3157	-12.724	-15.8746	-19.3525
60.3006	-15.5979	-10.3053	-12.4207	-11.0053	-31.1205	-17.4065	-13.8117		-19.7415	-12.9293	-12.5601	-15.4754	-19.2237
60.4006	-15.5835	-10.2409	-12.4207	-10.4579	-30.7985	-17.0845	-13.5155		-19.8059	-12.7233	-12.3728	-15.7587	-19.0949
60.5006	-15.1256	-10.3911	-12.5495	-10.2325	-30.3478	-16.5694	-13.2579		-19.7415	-12.3884	-12.2908	-15.3337	-18.8491
60.6006	-14.9253	-10.5628	-12.6461	-9.84618	-30.7985	-16.3762	-12.7685		-18.9688	-12.5687	-12.0332	-15.3595	-18.6852
60.7006	-14.5962	-10.6916	-12.7427	-9.78179	-30.6698	-16.3118	-12.4337		-18.3249	-12.6202	-11.7639	-15.0633	-18.5681
60.8006	-14.4102	-10.7346	-12.6783	-9.39543	-30.7341	-16.5694	-12.0989		-17.6165	-12.3627	-11.4595	-14.7155	-18.4042
60.9006	-14.2814	-10.7131	-12.4529	-9.39543	-30.8629	-17.0201	-11.764		-17.6809	-12.0536	-11.319	-14.3421	-18.3808
61.0006	-14.4102	-10.5414	-12.2919	-9.52422	-31.2493	-17.2777	-11.2489		-17.037	-12.3369	-11.0381	-14.3936	-18.3222
61.1006	-14.1812	-10.1121	-12.0344	-9.74959	-31.4425	-16.4406	-11.442		-17.7453	-12.3884	-11.2605	-14.2519	-18.2286
61.2006	-14.081	-9.76866	-11.7768	-9.87838	-31.5069	-16.3762	-11.3519		-18.1317	-12.4142	-11.3308	-14.1746	-18.1115
61.3006	-13.9809	-9.40377	-11.648	-10.2003	-31.6357	-16.0542	-11.6481		-18.2605	-12.4399	-11.2605	-14.1875	-17.9242
61.4006	-13.7519	-9.23206	-11.6802	-10.4257	-31.5069	-16.0542	-11.7383		-18.2605	-12.0793	-11.1434	-14.033	-17.8656
61.5006	-13.8092	-9.31791	-11.487	-10.6833	-31.2493	-16.5694	-11.661		-18.3893	-11.5384	-11.0029	-13.8398	-17.8188
61.6006	-13.5516	-9.51109	-11.5192	-10.3291	-31.1205	-16.8269	-11.4163		-18.1317	-11.1521	-10.4527	-13.6724	-17.8422
61.7006	-13.1938	-9.4467	-11.6158	-10.1681	-30.541	-16.7626	-11.3261		-17.4877	-10.6884	-10.16	-13.5307	-17.7954
61.8006	-13.2082	-9.36084	-11.5836	-10.1038	-30.4122	-16.8913	-10.8367		-17.4877	-10.6884	-10.1483	-13.4148	-17.9007
61.9006	-13.1366	-8.97448	-11.4548	-10.2647	-30.0258	-16.2474	-10.7852		-17.1658	-10.9975	-9.96094	-13.3762	-17.8305
62.0006	-12.879	-8.75984	-11.5514	-9.94277	-29.8326	-15.9254	-10.7466		-17.1014	-11.1263	-9.9024	-13.2731	-17.6666
62.1006	-12.6787	-8.50227	-11.3904	-9.91058	-29.5751	-15.5391	-10.708		-16.4575	-11.2036	-9.97264	-13.3118	-17.6198
62.2006	-12.6644	-8.52373	-11.2616	-9.97497	-29.2531	-15.1527	-10.4375		-16.4575	-11.2809	-9.93752	-13.286	-17.5378
62.3006	-12.5356	-8.5452	-11.1973	-9.7174	-28.5448	-14.702	-10.3345		-15.6847	-10.843	-9.72678	-13.183	-17.491
62.4006	-12.4497	-8.75984	-10.9397	-9.29884	-28.416	-14.7664	-10.2057		-15.4272	-10.2248	-9.79703	-13.1186	-17.2919
62.5006	-12.2637	-8.67398	-10.8431	-9.00907	-28.2872	-14.1868	-10.4375		-15.4272	-10.2506	-9.51604	-12.9383	-17.3036
62.6006	-12.1492	-8.67398	-11.1007	-9.36323	-28.3516	-13.9293	-10.0769		-15.6203	-10.0445	-9.42237	-12.7709	-17.1514
62.7006	-12.1922	-8.60959	-11.0363	-9.42763	-28.738	-14.5088	-10.1155		-15.234	-9.58088	-9.36384	-12.6421	-17.0109
62.8006	-11.9775	-8.80277	-10.9075	-9.58861	-28.738	-15.0239	-10.4504		-15.7491	-9.45209	-9.00089	-12.8224	-16.8705
62.9006	-11.9918	-9.01741	-10.9397	-9.74959	-28.2872	-14.8952	-10.2572		-15.8779	-9.83845	-8.79015	-12.6678	-16.929
63.0006	-11.9775	-8.95302	-10.5533	-9.84618	-28.1584	-14.8308	-10.0125		-15.4916	-9.60664	-8.66136	-12.6807	-16.9173
63.1006	-11.9918	-8.97448	-10.2957	-9.7174	-27.8365	-14.8952	-10.2186		-15.1052	-9.65815	-8.42721	-12.7966	-16.847
63.2006	-11.8487	-8.71691	-10.0704	-9.49202	-27.5789	-14.4444	-10.2958		-15.234	-9.83845	-8.32184	-12.7322	-16.8119
63.3006	-11.8631	-8.37348	-10.1992	-9.52422	-27.3857	-14.5732	-9.88373		-15.556	-10.0445	-8.38038	-12.5777	-16.4607
63.4006	-11.5769	-8.1803	-10.3279	-9.49202	-27.2569	-14.3156	-10.064		-15.4272	-10.1991	-8.36867	-12.3716	-16.3553
63.5006	-11.3479	-8.22323	-10.5533	-9.04127	-26.4842	-14.3156	-10.064		-15.234	-10.2506	-8.47404	-12.333	-16.2734
63.6006	-11.1476	-8.24469	-10.3601	-8.68711	-25.7759	-14.5088	-10.0769		-15.0408	-9.94148	-8.47404	-12.011	-16.2616
63.7006	-11.119	-8.22323	-10.4567	-8.84809	-25.5827	-14.4444	-9.88373		-14.7832	-9.96724	-8.42721	-11.7792	-16.1563
63.8006	-11.2477	-8.4808	-10.2314	-8.55832	-25.6471	-13.6073	-10.2443		-13.7529	-9.94148	-8.35696	-11.7921	-16.2382
63.9006	-11.0188	-8.58812	-10.0704	-8.39734	-25.4539	-13.6073	-10.3345		-13.7529	-9.50361	-8.20476	-11.8307	-15.9807
64.0006	-10.9902	-8.65252	-9.90939	-8.88029	-25.9047	-13.6073	-10.1542		-13.6886	-9.50361	-8.06426	-11.5088	-15.9689
64.1006	-11.2048	-8.37348	-9.90939	-8.97688	-26.2266	-13.9936	-9.961		-13.5598	-9.29755	-8.08768	-11.38	-15.8753
64.2006	-11.1905	-8.39494	-9.65182	-8.52612	-25.4539	-14.1868	-9.961		-13.4954	-9.22028	-8.04085	-11.3285	-15.7465
64.3006	-10.704	-8.00859	-9.49083	-8.49393	-25.1319	-14.5088	-9.51025		-13.7529	-8.75665	-8.22817	-11.1739	-15.7933
64.4006	-10.8471	-7.81541	-9.23326	-8.49393	-24.8744	-14.7664	-9.29131		-13.4954	-8.96271	-8.38038	-10.9163	-15.8987
64.5006	-10.8471	-7.55783	-9.20106	-8.20416	-24.9388	-14.3156	-8.91783		-13.431	-8.85968	-8.23988	-10.7876	-15.7465
64.6006	-10.4893	-7.64369	-8.75031	-7.7856	-24.3592	-13.8649	-8.93071		-13.3022	-8.85968	-8.25159	-10.9679	-15.5592
64.7006	-10.5323	-7.64369	-8.42835	-7.59242	-24.3592	-13.4141	-8.57011		-13.6886	-9.06574	-8.18134	-10.8262	-15.4304
64.8006	-10.704	-7.72955	-8.49274	-7.27046	-23.9729	-13.5429	-8.55723		-13.3666	-9.03998	-8.20476	-10.3883	-15.3367
64.9006	-10.518	-7.5793	-8.33176	-7.39924	-23.9729	-13.0921	-8.32542		-12.9802	-8.83392	-8.04085	-10.3626	-15.3718
65.0007	-10.3462	-7.34319	-8.46054	-7.23826	-23.5865	-13.3497	-8.2739		-12.8514	-8.6021	-8.20476	-10.4012	-15.2314
65.1007	-10.4321	-6.9139	-8.52494	-7.46364	-23.5221	-13.4785	-7.90042		-13.3022	-8.67938	-8.07597	-10.0277	-15.3367
65.2007	-10.103	-6.72072	-8.42835	-7.59242	-23.2645	-13.4141	-8.02921		-12.9802	-8.21575	-8.15793	-10.3239	-15.3601
65.3007	-9.87402	-6.69926	-8.13858	-7.8178	-23.5221	-12.9634	-7.93906		-13.0446	-8.26726	-8.1111	-10.2853	-15.1611
65.4007	-9.94557	-6.59194	-8.07418	-7.75341	-23.6509	-12.9634	-7.87466		-13.0446	-8.18999	-8.16964	-10.3368	-15.0674
65.5007	-9.80248	-7.02122	-8.04199	-7.72121	-23.3289	-13.1565	-7.88754		-12.9802	-7.77787	-8.28671	-10.2338	-15.1143
65.6007	-9.73093	-7.04269	-7.9454	-7.8178	-23.0714	-12.577	-7.83603		-12.7871	-7.31424	-8.48575	-10.1307	-15.1026
65.7007	-9.71662	-6.9783	-8.10638	-8.10757	-23.2002	-12.577	-7.46255		-12.0787	-7.1597	-8.47404	-9.80878	-15.1026
65.8007	-9.50197	-6.76365	-7.9454	-7.68901	-22.7494	-13.1565	-7.16634		-11.7568	-6.87637	-8.45062	-9.73151	-15.0557
65.9007	-9.5449	-6.9139	-8.04199	-7.23826	-22.2986	-12.8346	-6.81862		-12.0143	-6.6188	-8.36867	-9.78303	-14.7747
66.0007	-9.55921	-6.87097	-7.881	-7.36705	-21.6547	-12.255	-6.56104		-11.7568	-6.49001	-8.38038	-9.78303	-14.646
66.1007	-9.73093	-7.06415	-8.26736	-6.94849	-21.7835	-12.3194	-6.68983		-11.4348	-6.7991	-8.18134	-9.82166	-14.3884
66.2007	-9.60214	-7.04269	-8.23517	-6.62653	-21.7191	-12.1262	-6.85725		-11.8855	-7.21121	-8.06426	-9.4997	-14.2713
66.3007	-9.65938	-7.02122	-8.62153	-6.9163	-21.5903	-11.8043	-7.08907		-11.5636	-7.18546	-7.9706	-9.70575	-14.3298
66.4007	-9.50197	-6.84951	-8.75031	-6.94849	-21.7835	-11.8687	-7.41103		-11.628	-7.44303	-7.90036	-9.35803	-14.3416
66.5007	-9.50197	-6.48461	-8.8147	-6.43335	-21.7191	-11.9331	-7.83603		-11.7568	-7.7006	-7.88865	-9.47394	-14.3064
66.6007	-9.35888	-6.57047	-8.55713	-6.78751	-21.3328	-11.9975	-7.70724		-11.5636	-7.67484	-7.85352	-9.57697	-14.3064
66.7007	-9.07269	-6.44169	-8.52494	-6.98069	-21.1396	-11.4179	-7.75876		-11.8212	-7.41727	-7.75986	-9.87318	-14.2245
66.8007	-8.91528	-6.82804	-8.65372	-7.07728	-21.0108	-10.9672	-7.78451		-12.2075	-7.57181	-7.70132	-9.69287	-14.0489
66.9007	-9.00114	-6.65633	-8.39615	-6.72312	-20.56	-11.3535	-7.61709		-11.3704	-7.23697	-7.63107	-9.71863	-13.9552
67.0007	-8.92959	-6.76365	-8.55713	-7.33485	-21.0108	-11.4179	-7.44967		-11.4348	-7.1597	-7.36179	-9.16485	-13.7913
67.1007	-8.84373	-6.57047	-8.26736	-6.98069	-20.6244	-10.9672	-7.64285		-11.2416	-6.77334	-7.0691	-8.93304	-13.7093
67.2007	-8.88666	-6.69926	-8.13858	-6.49774	-20.1093	-11.8687	-7.92618		-10.5977	-6.87637	-6.78811	-8.72698	-13.7913
67.3007	-8.81511	-6.26997	-7.36586	-6.27236	-20.1737	-11.6111	-7.92618		-10.4045	-6.72183	-6.50712	-8.52092	-13.8264
67.4007	-8.5003	-6.48461	-7.23707	-6.78751	-19.401	-11.1603	-7.74588		-10.4045	-6.64455	-6.50712	-8.57243	-13.6157
67.5007	-8.40014	-6.03386	-6.81852	-6.62653	-18.6282	-10.9028	-7.51406		-10.0181	-6.38698	-6.41346	-8.7141	-13.6391
67.6007	-8.28566	-5.96947	-6.78632	-7.01288	-19.2078	-11.2891	-7.33376		-10.0825	-6.54152	-6.22613	-8.54668	-13.4986
67.7007	-8.37152	-6.09826	-7.0117	-7.17387	-19.1434	-10.774	-6.68983		-10.0181	-6.20668	-6.20272	-8.43077	-13.3464
67.8007	-8.51461	-6.24851	-7.49465	-7.30265	-18.4995	-10.774	-6.50953		-9.24543	-6.23244	-6.13247	-8.46941	-13.1942
67.9007	-8.35721	-6.05533	-7.49465	-7.04508	-18.9502	-11.096	-6.4065		-9.56739	-6.56728	-6.00368	-8.1732	-13.3347
68.0007	-8.28566	-6.22704	-7.33366	-7.07728	-18.8214	-11.4823	-6.7671		-9.30982	-7.08243	-5.98027	-8.1732	-13.2527
68.1007	-8.24273	-5.84068	-7.30147	-7.04508	-18.3707	-11.2247	-6.4065		-8.92346	-7.08243	-6.21443	-8.31486	-13.3698
68.2007	-8.09964	-5.43286	-6.62534	-7.04508	-18.2419	-11.8043	-6.93453		-8.98786	-7.10818	-6.23784	-7.9929	-13.1474
68.3007	-8.01378	-5.36847	-6.36777	-6.65872	-19.0146	-11.5467	-6.93453		-9.76057	-6.92788	-6.3198	-7.94138	-12.8898
68.4007	-8.0424	-5.60458	-6.39996	-6.98069	-19.2078	-11.2247	-6.88301		-10.0181	-6.41274	-6.15589	-7.91562	-12.7493
68.5007	-8.0424	-5.54018	-6.52875	-6.52994	-19.1434	-11.4823	-6.87013		-10.0181	-6.23244	-5.98027	-7.94138	-12.679
68.6007	-7.85637	-5.66897	-6.49655	-6.17577	-19.0146	-11.0316	-7.24361		-9.37421	-6.33547	-5.81636	-7.55502	-12.4449
68.7007	-7.85637	-5.79775	-6.59314	-6.11138	-19.2722	-10.7096	-7.11483		-9.11664	-6.18092	-5.71099	-7.7482	-12.5034
68.8007	-7.7419	-5.88361	-6.43216	-6.33676	-18.6926	-10.9028	-7.21785		-8.6015	-6.30971	-5.46512	-7.83835	-12.6673
68.9007	-7.78482	-5.58311	-6.46436	-5.78942	-18.3707	-10.8384	-7.29513		-8.21514	-6.38698	-5.30121	-7.87699	-12.6556
69.0007	-7.62742	-5.4114	-6.33557	-5.9182	-18.5638	-10.1301	-7.15346		-8.40832	-6.07789	-5.21926	-7.77396	-12.7025
69.1007	-7.7419	-5.30407	-6.46436	-5.78942	-18.1775	-10.0013	-7.47543		-9.05225	-5.64002	-5.54708	-7.85123	-12.7025
69.2007	-7.78482	-5.15382	-6.62534	-5.72502	-17.6623	-9.93688	-7.47543		-8.85907	-5.84608	-5.64074	-7.58078	-12.5737
69.3007	-7.57018	-4.85332	-6.75412	-5.62843	-17.4048	-9.93688	-7.11483		-8.85907	-6.05214	-5.59391	-7.34897	-12.4098
69.4007	-7.49863	-4.87479	-6.49655	-6.11138	-17.3404	-10.1945	-7.14058		-8.40832	-5.92335	-5.64074	-7.47775	-12.3161
69.5007	-7.67035	-5.08943	-6.56095	-6.11138	-17.1472	-10.3232	-7.08907		-7.24924	-6.07789	-5.64074	-7.31033	-12.1873
69.6007	-7.69897	-5.13236	-6.72193	-6.43335	-17.1472	-10.6452	-6.66407		-7.18485	-6.23244	-5.20755	-7.47775	-12.1288
69.7007	-7.58449	-5.0465	-7.04389	-6.78751	-17.3404	-10.3876	-6.2262		-6.99167	-6.30971	-5.09047	-7.33609	-12.1288
69.8007	-7.79913	-5.28261	-6.65753	-6.8519	-17.3404	-9.80809	-6.27772		-7.05606	-5.69154	-5.28951	-7.16866	-12.0702
69.9007	-7.67035	-5.54018	-6.88291	-6.69092	-17.1472	-9.48613	-6.23908		-7.24924	-6.23244	-5.21926	-6.64064	-11.8712
70.0007	-7.28399	-5.86215	-6.91511	-6.8841	-16.5033	-9.29295	-6.21332		-8.27953	-5.58851	-5.00852	-6.56337	-11.719
70.1007	-7.16951	-5.94801	-6.39996	-6.8841	-16.3101	-9.55052	-6.34211		-8.6015	-5.43396	-4.94998	-6.44746	-11.6136
70.2007	-7.04073	-6.3129	-5.98141	-6.8519	-15.8593	-9.29295	-6.79286		-8.85907	-5.25366	-5.00852	-6.602	-11.4966
70.3007	-6.9978	-6.18411	-6.0458	-6.81971	-15.4086	-10.1945	-6.99892		-9.05225	-5.2279	-4.8329	-6.57625	-11.5317
70.4007	-6.6973	-6.03386	-5.88482	-6.52994	-15.2154	-9.7437	-7.21785		-8.98786	-4.687	-4.79778	-6.76943	-11.6839
70.5007	-6.5542	-5.79775	-5.56285	-6.24017	-15.3442	-9.48613	-7.32088		-8.21514	-5.07336	-4.70411	-6.67928	-11.6488
70.6007	-6.56851	-5.94801	-5.94921	-5.85381	-15.4086	-9.55052	-7.03755		-7.37803	-5.25366	-4.65728	-6.33155	-11.6253
70.7007	-6.75453	-5.86215	-5.82042	-5.24207	-15.2798	-9.48613	-6.89589		-7.18485	-5.17639	-4.3763	-6.17701	-11.5902
70.8007	-6.68299	-5.96947	-6.14239	-5.37086	-15.0866	-8.64902	-6.92165		-7.05606	-4.97033	-4.45825	-6.13837	-11.6605
70.9007	-6.8547	-5.49725	-5.98141	-5.40306	-15.0222	-8.90659	-6.92165		-6.92728	-4.687	-4.2358	-6.1255	-11.5902
71.0007	-7.09796	-5.43286	-5.85262	-5.66063	-14.9578	-9.29295	-6.7671		-7.44242	-4.5067	-4.39971	-6.18989	-11.5668
71.1007	-6.96918	-5.32554	-5.46626	-5.88601	-14.8934	-8.39145	-6.62544		-7.89317	-4.40367	-4.49337	-6.33155	-11.4146
71.2007	-6.78315	-4.91772	-5.49846	-5.9504	-15.0222	-8.64902	-6.54817		-7.95757	-4.09459	-4.55191	-6.2414	-11.3678
71.3007	-6.78315	-4.70307	-5.1443	-5.69283	-15.0222	-8.90659	-6.14893		-7.89317	-4.3264	-4.28263	-6.31868	-11.1804
71.4007	-6.76884	-4.91772	-5.20869	-5.75722	-14.9578	-9.03538	-5.78833		-7.95757	-4.91882	-4.61045	-5.98383	-11.1219
71.5007	-6.94056	-4.76746	-5.43407	-5.53184	-15.5374	-8.7778	-5.72393		-7.82878	-5.07336	-4.50508	-6.03535	-10.9346
71.6007	-6.76884	-4.76746	-5.56285	-5.20988	-15.0222	-9.22856	-5.92999		-8.02196	-4.81579	-4.45825	-5.97095	-11.0399
71.7007	-6.86901	-5.13236	-5.46626	-5.53184	-14.9578	-9.22856	-5.91711		-8.34392	-4.81579	-4.43483	-6.20277	-10.8995
71.8007	-6.5542	-5.36847	-5.56285	-5.56404	-14.9578	-8.8422	-6.00726		-7.69999	-4.58397	-4.46996	-6.13837	-10.7355
71.9007	-6.42541	-5.347	-5.30528	-5.72502	-14.5715	-8.52023	-6.09741		-7.82878	-4.1461	-4.42313	-6.3058	-10.6419
72.0007	-6.09629	-5.347	-4.88672	-5.9182	-13.9919	-8.52023	-6.00726		-7.57121	-4.06883	-4.43483	-6.04822	-10.6068
72.1007	-6.22508	-5.19675	-4.88672	-6.27236	-13.9275	-8.00509	-6.0459		-7.05606	-4.37792	-4.25922	-5.80353	-10.478
72.2007	-6.13922	-5.21822	-4.98331	-5.82161	-13.67	-7.81191	-6.05878		-6.99167	-4.19761	-4.35288	-5.57171	-10.6185
72.3007	-6.31094	-4.91772	-4.88672	-5.56404	-13.67	-8.45584	-6.02014		-7.37803	-4.84155	-4.43483	-5.59747	-10.759
72.4007	-6.46834	-5.00357	-4.95112	-5.33866	-13.1548	-8.39145	-6.03302		-7.12045	-5.02185	-4.55191	-5.75202	-10.7824
72.5007	-6.65437	-5.17529	-5.27308	-5.11329	-13.2836	-8.06948	-6.08454		-6.79849	-5.07336	-4.48167	-5.50732	-10.8058
72.6007	-6.64006	-4.87479	-5.1121	-4.88791	-13.7344	-8.97098	-6.18756		-6.60531	-4.91882	-4.46996	-5.63611	-10.6653
72.7007	-6.38249	-4.66014	-4.95112	-4.79132	-13.8632	-8.7778	-6.08454		-5.7682	-4.99609	-4.2358	-5.80353	-10.5599
72.8007	-6.36818	-4.48843	-4.82233	-5.0167	-13.7344	-8.71341	-6.49665		-5.70381	-4.58397	-4.01335	-5.75202	-10.595
72.9007	-6.31094	-4.76746	-4.88672	-5.30647	-14.3139	-8.58462	-6.49665		-5.51063	-4.63549	-3.66212	-5.55884	-10.3609
73.0007	-6.23939	-4.70307	-4.53256	-5.14548	-14.7003	-8.8422	-6.50953		-5.51063	-4.37792	-3.73236	-5.80353	-10.3726
73.1007	-5.91027	-5.15382	-4.40378	-4.9845	-14.6359	-8.13387	-6.05878		-5.57502	-4.27489	-3.81432	-5.80353	-10.3492
73.2007	-5.92458	-5.23968	-4.2106	-5.17768	-14.1851	-8.00509	-5.90424		-5.83259	-4.40367	-3.70895	-5.73914	-10.1267
73.3007	-5.82441	-5.47579	-4.2106	-5.14548	-14.1851	-7.94069	-5.78833		-6.41213	-4.3264	-3.73236	-5.63611	-9.98624
73.4007	-5.62408	-5.13236	-4.04961	-4.79132	-14.3139	-8.06948	-5.85272		-6.28334	-4.04307	-3.6387	-5.39141	-9.99795
73.5007	-5.58115	-4.91772	-3.88863	-4.72693	-13.2836	-8.19827	-5.83984		-6.54092	-4.01731	-3.38113	-5.22399	-9.86916
73.6007	-5.49529	-4.81039	-3.66325	-4.9523	-12.9616	-8.32705	-6.2262		-6.6697	-3.88853	-3.45138	-5.22399	-9.6233
73.7007	-5.5096	-4.78893	-3.98522	-5.08109	-12.8973	-8.45584	-6.5868		-6.7341	-3.37338	-3.60358	-4.95354	-9.68184
73.8007	-5.49529	-4.68161	-3.88863	-4.88791	-13.1548	-8.13387	-6.59968		-5.89699	-3.16732	-3.54504	-5.08233	-9.56476
73.9007	-5.56684	-4.70307	-3.75984	-4.66254	-12.7685	-8.39145	-6.43226		-6.02577	-3.37338	-3.61529	-5.22399	-9.38914
74.0007	-5.56684	-4.81039	-3.69545	-4.50155	-13.0904	-7.94069	-6.14893		-6.34774	-3.68247	-3.7792	-5.31414	-9.44768
74.1007	-5.76717	-4.59575	-3.92083	-4.40496	-13.1548	-7.81191	-6.11029		-6.47652	-4.01731	-3.40454	-5.08233	-9.61159
74.2007	-5.62408	-4.68161	-3.56666	-4.27618	-13.4768	-8.06948	-5.55651		-6.28334	-4.55822	-3.58016	-5.19823	-9.56476
74.3007	-5.63839	-4.81039	-3.69545	-4.27618	-13.2192	-7.8763	-4.98985		-6.09016	-4.687	-3.62699	-4.92778	-9.56476
74.4007	-5.59546	-5.00357	-4.11401	-4.27618	-13.4124	-7.68312	-5.17015		-5.63941	-4.45519	-3.87286	-5.01793	-9.65842
74.5007	-5.39512	-4.89625	-4.46817	-4.43716	-13.348	-7.94069	-5.3247		-5.44623	-4.12034	-3.82603	-5.17248	-9.42426
74.6007	-5.19479	-5.30407	-4.50037	-4.21178	-13.0904	-7.8763	-5.20879		-5.05987	-4.09459	-4.22409	-5.32702	-9.14328
74.7007	-5.3522	-5.56165	-4.66135	-3.88982	-12.9616	-7.55433	-5.28606		-5.18866	-3.73398	-3.88457	-5.19823	-9.00278
74.8007	-5.29496	-5.49725	-4.50037	-4.0508	-12.7041	-7.68312	-5.53075		-5.51063	-3.73398	-3.83773	-5.09521	-8.76862
74.9007	-5.39512	-5.43286	-4.33938	-4.11519	-12.1245	-7.36116	-5.10576		-6.02577	-3.73398	-3.49821	-5.01793	-8.62813
75.0008	-5.56684	-5.56165	-4.46817	-4.27618	-12.2533	-7.48994	-5.19591		-5.63941	-3.9658	-3.56845	-4.78612	-8.59301
75.1008	-5.69563	-5.30407	-4.40378	-4.21178	-12.4465	-7.61873	-5.06712		-5.57502	-3.55368	-3.17039	-4.50279	-8.81546
75.2008	-5.49529	-5.0465	-4.1784	-4.69473	-12.5109	-7.81191	-5.09288		-5.38184	-3.47641	-3.07672	-4.4384	-8.874
75.3008	-5.78148	-5.06797	-4.11401	-4.69473	-12.5753	-7.68312	-4.8997		-5.18866	-3.37338	-3.0416	-4.4384	-8.97937
75.4008	-6.02475	-4.98211	-3.56666	-4.79132	-12.3177	-7.68312	-5.11864		-4.48034	-3.37338	-3.07672	-4.4384	-8.99107
75.5008	-5.82441	-4.98211	-3.05152	-4.59814	-11.6094	-7.48994	-5.00273		-4.73791	-3.2446	-2.87769	-4.54142	-8.97937
75.6008	-5.93889	-5.32554	-2.79395	-4.92011	-11.1586	-7.29676	-5.05425		-5.05987	-3.16732	-2.72549	-4.9149	-9.0379
75.7008	-5.99613	-5.21822	-3.11591	-4.66254	-10.9655	-7.10358	-5.23455		-5.38184	-3.57944	-2.66695	-4.99218	-8.93253
75.8008	-6.05337	-5.26115	-3.2447	-4.59814	-10.5147	-7.29676	-5.45348		-5.18866	-3.68247	-2.76061	-5.00506	-8.82716
75.9008	-5.89596	-5.11089	-3.69545	-4.53375	-10.8367	-7.23237	-5.46636		-5.57502	-3.37338	-2.74891	-4.65733	-8.75692
76.0008	-6.03906	-5.19675	-3.95302	-4.21178	-10.8367	-7.10358	-5.15727		-4.93109	-3.29611	-2.86598	-4.65733	-8.75692
76.1008	-6.21077	-4.93918	-4.27499	-4.0186	-11.1586	-6.9104	-4.98985		-4.48034	-3.4249	-3.00648	-4.46415	-8.48764
76.2008	-6.18215	-4.96064	-3.85643	-3.95421	-11.1586	-6.9104	-4.65501		-4.54473	-2.90975	-3.12356	-4.38688	-8.4291
76.3008	-6.08198	-4.76746	-3.63106	-3.85762	-11.2874	-6.58844	-4.62925		-4.48034	-2.90975	-3.14697	-4.63158	-8.30031
76.4008	-6.13922	-4.72454	-3.30909	-3.85762	-11.0299	-6.39526	-4.64213		-4.8023	-3.16732	-3.12356	-4.64445	-8.17152
76.5008	-6.21077	-4.72454	-3.53447	-4.24398	-10.9011	-6.84601	-4.80955		-5.70381	-3.27035	-2.91281	-4.58006	-8.14811
76.6008	-5.89596	-4.81039	-3.47007	-4.34057	-10.3859	-7.16798	-4.73228		-5.96138	-2.83248	-2.83086	-4.50279	-8.26519
76.7008	-6.02475	-4.93918	-3.69545	-4.40496	-9.99956	-7.10358	-4.8997		-5.63941	-3.16732	-2.83086	-4.52855	-8.32373
76.8008	-5.83872	-4.746	-3.82424	-4.34057	-9.74199	-6.84601	-4.83531		-6.15456	-2.884	-2.71378	-4.29673	-8.31202
76.9008	-5.55253	-4.78893	-3.85643	-4.37277	-10.2571	-7.10358	-5.13152		-6.15456	-2.98702	-2.85428	-4.63158	-8.20665
77.0008	-5.5096	-4.50989	-3.63106	-4.43716	-9.93517	-5.75133	-5.3247		-5.38184	-3.16732	-3.02989	-4.63158	-8.08957
77.1008	-5.66701	-4.61721	-3.59886	-4.40496	-10.3859	-5.88011	-5.58227		-5.83259	-3.57944	-3.02989	-4.69597	-7.82029
77.2008	-5.73855	-4.61721	-3.69545	-4.37277	-10.1927	-6.13769	-5.49212		-6.34774	-3.4249	-2.91281	-4.88915	-7.63296
77.3008	-5.83872	-5.11089	-3.82424	-4.0508	-10.4503	-6.45965	-5.3247		-6.28334	-3.68247	-2.93623	-5.10808	-7.58613
77.4008	-6.09629	-5.21822	-3.88863	-3.79323	-10.3859	-6.52404	-4.87395		-5.51063	-3.70823	-2.53816	-4.9149	-7.77346
77.5008	-6.19646	-5.38993	-3.92083	-3.66444	-10.7079	-7.23237	-4.88682		-5.70381	-3.29611	-2.43279	-5.01793	-7.65638
77.6008	-6.19646	-4.93918	-3.85643	-3.53566	-9.93517	-6.78162	-4.80955		-4.93109	-3.2446	-2.67866	-5.28839	-7.73833
77.7008	-6.08198	-4.68161	-3.88863	-3.43907	-9.87078	-6.71722	-4.79667		-4.22276	-3.2446	-3.02989	-5.26263	-7.97249
77.8008	-6.01044	-4.12353	-3.75984	-3.66444	-9.48442	-6.39526	-4.97697		-4.28716	-3.45065	-3.20551	-5.05657	-7.96078
77.9008	-6.1106	-3.86596	-3.98522	-3.47126	-9.22685	-6.45965	-4.95122		-4.8667	-3.63096	-3.3343	-5.30126	-7.73833
78.0008	-5.88165	-3.75864	-3.88863	-3.40687	-9.42002	-6.58844	-4.82243		-4.99548	-3.9658	-3.36942	-5.45581	-7.6798
78.1008	-5.73855	-4.10207	-3.79204	-3.37467	-10.064	-7.03919	-4.73228		-5.05987	-3.73398	-3.0416	-5.50732	-7.62126
78.2008	-5.86734	-4.31671	-3.69545	-3.47126	-10.1927	-6.52404	-4.84819		-5.96138	-3.63096	-2.99477	-5.61035	-7.19977
78.3008	-5.92458	-4.72454	-3.50227	-3.69664	-10.5147	-6.9748	-4.70652		-5.70381	-3.32187	-2.91281	-5.77777	-7.05928
78.4008	-5.8101	-4.85332	-3.47007	-3.88982	-10.4503	-6.65283	-4.86107		-6.02577	-2.75521	-3.02989	-5.82929	-7.05928
78.5008	-5.68132	-5.02504	-3.43788	-3.85762	-10.064	-6.58844	-4.87395		-5.89699	-2.36885	-3.10014	-5.86792	-7.05928
78.6008	-5.82441	-4.48843	-3.50227	-3.98641	-9.54881	-6.33087	-4.97697		-6.15456	-2.39461	-3.14697	-5.63611	-6.96562
78.7008	-5.8101	-4.27378	-3.47007	-3.53566	-9.09806	-6.26647	-4.83531		-5.44623	-2.44612	-2.98306	-5.62323	-7.07099
78.8008	-5.66701	-4.18793	-3.79204	-3.56785	-9.03367	-5.62254	-4.80955		-5.25305	-2.34309	-2.70207	-5.63611	-6.9422
78.9008	-5.6527	-4.12353	-3.75984	-3.31028	-8.96927	-5.55815	-4.59062		-4.67352	-2.29158	-2.85428	-5.81641	-6.90708
79.0008	-5.99613	-4.10207	-3.85643	-3.40687	-9.42002	-5.30058	-4.5391		-4.8023	-2.21431	-2.94794	-5.82929	-6.79
79.1008	-5.99613	-4.59575	-3.79204	-3.40687	-9.35563	-4.91422	-4.28153		-5.05987	-2.18855	-3.12356	-6.28004	-6.83683
79.2008	-5.68132	-4.746	-3.82424	-3.76103	-9.54881	-5.1074	-4.30729		-4.73791	-2.16279	-3.29917	-6.58913	-6.79
79.3008	-5.63839	-4.78893	-3.50227	-3.31028	-9.22685	-5.17179	-3.98532		-5.05987	-2.16279	-3.3343	-6.93685	-6.9422
79.4008	-5.46667	-4.96064	-3.30909	-3.69664	-9.29124	-4.78543	-3.76638		-4.99548	-2.13703	-3.27576	-6.96261	-6.76658
79.5008	-5.18048	-4.76746	-3.08372	-3.53566	-8.64731	-4.72104	-3.56033		-5.12427	-2.00825	-3.25234	-6.98836	-6.74317
79.6008	-4.9086	-4.33818	-3.18031	-3.47126	-8.64731	-5.23618	-3.28987		-4.73791	-2.05976	-3.00648	-6.8467	-6.60267
79.7008	-4.9086	-4.23086	-2.89054	-3.37467	-8.58291	-5.17179	-3.25124		-4.99548	-1.95673	-2.8894	-6.65352	-6.60267
79.8008	-4.89429	-4.23086	-2.92273	-3.56785	-8.45413	-5.42936	-3.54745		-4.60912	-1.85371	-3.00648	-6.58913	-6.47389
79.9008	-4.66534	-4.25232	-2.82614	-3.47126	-8.26095	-6.0089	-3.93381		-4.35155	-1.98249	-3.06502	-6.34443	-6.45047
80.0008	-4.67965	-4.4455	-2.69736	-3.40687	-8.26095	-6.0089	-3.86941		-3.96519	-2.03401	-2.70207	-6.33155	-6.43876
80.1008	-4.70826	-4.76746	-2.47198	-3.37467	-8.13216	-5.30058	-4.24289		-3.83641	-2.00825	-2.98306	-6.31868	-6.38022
80.2008	-4.70826	-4.91772	-2.69736	-3.1171	-8.00338	-5.043	-4.1785		-3.38565	-2.54915	-2.98306	-6.40883	-6.30998
80.3008	-5.03738	-4.78893	-2.85834	-3.1493	-7.93898	-5.30058	-4.24289		-3.19247	-2.65218	-2.81915	-6.38307	-6.46218
80.4008	-5.39512	-4.91772	-2.89054	-2.95612	-7.93898	-4.78543	-4.1785		-4.02958	-2.16279	-2.71378	-6.82094	-6.57926
80.5008	-5.39512	-4.96064	-3.2125	-2.76294	-8.13216	-4.91422	-4.19138		-3.51444	-2.36885	-2.8894	-6.82094	-6.66121
80.6008	-5.38081	-4.76746	-3.34129	-2.63415	-8.13216	-5.49375	-4.33304		-3.25687	-2.31734	-2.97135	-6.74367	-6.64951
80.7008	-5.59546	-4.55282	-3.2769	-3.1493	-8.64731	-5.68693	-4.33304		-3.64323	-1.4931	-3.00648	-6.75655	-6.54413
80.8008	-5.18048	-4.59575	-2.95493	-3.18149	-8.58291	-5.55815	-4.16562		-3.9008	-1.3128	-3.17039	-6.76943	-6.30998
80.9008	-4.98015	-4.12353	-2.92273	-3.27808	-8.13216	-5.68693	-3.74063		-3.32126	-1.6734	-2.8894	-6.56337	-6.40364
81.0008	-5.02308	-3.86596	-2.82614	-3.60005	-7.8102	-5.42936	-3.80502		-3.96519	-1.44159	-2.86598	-6.67928	-6.41535
81.1008	-5.23772	-3.80157	-2.82614	-3.63225	-7.7458	-5.17179	-3.94668		-4.60912	-1.59613	-2.5967	-6.82094	-6.4973
81.2008	-5.23772	-3.95182	-2.79395	-3.37467	-6.90869	-5.23618	-4.03683		-4.48034	-1.75068	-2.39767	-6.8467	-6.43876
81.3008	-5.30927	-3.97328	-2.98713	-3.34248	-7.03748	-4.84982	-3.92093		-4.48034	-2.00825	-2.30401	-6.91109	-6.40364
81.4008	-5.32358	-4.03768	-3.2125	-3.53566	-6.65112	-4.72104	-4.32016		-4.41594	-1.6734	-2.54987	-6.87246	-6.27485
81.5008	-5.22341	-3.82303	-3.2447	-3.69664	-7.03748	-4.33468	-4.37168		-4.22276	-1.82795	-2.36255	-6.80806	-6.1929
81.6008	-5.10893	-3.7801	-3.2769	-3.60005	-6.90869	-4.33468	-4.32016		-3.9008	-1.69916	-2.30401	-6.35731	-6.05241
81.7008	-4.98015	-3.43667	-3.37349	-3.53566	-7.10187	-4.33468	-4.57774		-3.57883	-2.00825	-2.37425	-6.57625	-6.0407
81.8008	-4.75119	-3.35082	-3.69545	-3.1171	-6.90869	-4.72104	-4.70652		-3.45005	-2.03401	-2.65524	-6.46034	-6.15778
81.9008	-4.79412	-3.52253	-3.34129	-3.1493	-7.55262	-4.91422	-4.80955		-3.51444	-2.21431	-2.57329	-6.4217	-6.16948
82.0008	-4.89429	-3.73717	-3.43788	-3.05271	-7.87459	-5.30058	-4.9641		-3.45005	-2.29158	-2.92452	-6.3058	-6.00557
82.1008	-4.66534	-3.90889	-3.2125	-3.21369	-7.93898	-4.97861	-4.91258		-3.51444	-2.70369	-2.98306	-6.75655	-6.13436
82.2008	-4.69395	-3.90889	-3.2447	-3.05271	-8.26095	-4.91422	-4.52622		-3.9008	-2.57491	-2.97135	-6.40883	-6.02899
82.3008	-4.77981	-4.03768	-2.89054	-3.21369	-8.00338	-5.23618	-4.73228		-3.38565	-2.29158	-2.84257	-6.26716	-5.9002
82.4008	-4.63672	-4.31671	-3.05152	-3.02051	-8.00338	-5.1074	-4.57774		-3.64323	-2.21431	-2.81915	-6.26716	-5.82996
82.5008	-4.49362	-4.35964	-2.79395	-3.02051	-7.23066	-5.17179	-4.46183		-3.64323	-2.16279	-2.71378	-6.37019	-5.77142
82.6008	-4.40776	-4.145	-2.89054	-2.98831	-7.23066	-5.36497	-4.15274		-3.57883	-1.77643	-2.69037	-6.22852	-5.60751
82.7008	-4.12157	-4.23086	-2.76175	-3.27808	-6.45794	-5.17179	-4.02396		-3.64323	-1.62189	-2.90111	-6.37019	-5.51384
82.8008	-4.15019	-3.82303	-2.85834	-3.47126	-6.71551	-4.72104	-4.01108		-4.41594	-1.62189	-2.77232	-6.4861	-5.60751
82.9008	-4.13588	-3.39374	-2.69736	-3.31028	-6.45794	-4.84982	-3.71487		-4.09398	-1.59613	-2.81915	-6.6664	-5.5958
83.0008	-4.26467	-3.45814	-2.79395	-3.18149	-6.45794	-4.52786	-3.85653		-4.15837	-1.41583	-2.585	-6.56337	-5.63092
83.1008	-4.47931	-3.69425	-2.47198	-3.37467	-6.45794	-4.46346	-3.95956		-4.02958	-1.23553	-2.66695	-6.49898	-5.67775
83.2008	-4.9086	-3.97328	-2.69736	-3.24589	-6.8443	-4.84982	-4.29441		-4.28716	-1.46735	-2.57329	-6.28004	-5.71288
83.3008	-4.99446	-4.18793	-2.69736	-3.1493	-6.52233	-4.91422	-4.24289		-4.15837	-1.23553	-2.4445	-6.33155	-5.60751
83.4008	-4.99446	-4.38111	-2.69736	-3.37467	-6.58673	-5.1074	-4.55198		-4.41594	-1.15826	-2.12839	-6.22852	-5.38506
83.5008	-5.05169	-4.33818	-2.311	-3.1171	-6.20037	-5.1074	-4.47471		-4.67352	-1.33856	-2.08156	-6.38307	-5.40847
83.6008	-4.96584	-4.31671	-2.63296	-2.89172	-5.74962	-5.36497	-4.42319		-4.67352	-1.08099	-2.17522	-6.51185	-5.27969
83.7008	-4.62241	-4.18793	-2.63296	-2.73074	-5.68522	-5.17179	-4.28153		-4.09398	-0.849172	-2.02302	-6.46034	-5.36164
83.8008	-4.52224	-4.0806	-2.53637	-2.95612	-5.9428	-5.1074	-4.19138		-3.83641	-1.18402	-2.01131	-6.33155	-5.31481
83.9008	-4.36483	-3.95182	-2.66516	-2.82733	-5.81401	-4.39907	-4.32016		-3.51444	-1.54462	-2.33913	-6.18989	-5.50214
84.0008	-4.09295	-4.27378	-2.69736	-2.95612	-6.26476	-4.72104	-4.44895		-3.19247	-1.46735	-2.585	-5.82929	-5.47872
84.1008	-4.06433	-4.01621	-2.63296	-2.73074	-6.45794	-4.1415	-4.65501		-3.12808	-1.90522	-2.4445	-5.71338	-5.54897
84.2008	-4.00709	-3.75864	-2.11782	-2.79514	-6.45794	-4.07711	-4.70652		-3.70762	-1.90522	-2.26888	-5.54596	-5.40847
84.3008	-4.0214	-3.97328	-2.2788	-2.53756	-6.65112	-3.69075	-4.70652		-3.96519	-1.59613	-2.37425	-5.40429	-5.36164
84.4008	-4.09295	-4.10207	-2.37539	-2.37658	-6.26476	-4.01271	-4.29441		-3.64323	-1.26129	-2.33913	-5.35278	-5.23286
84.5008	-4.0214	-3.75864	-2.79395	-2.1834	-6.13598	-4.33468	-4.13986		-3.57883	-1.1325	-2.2923	-5.53308	-5.20944
84.6008	-3.94986	-3.86596	-2.82614	-2.34438	-6.39355	-4.78543	-4.11411		-3.45005	-1.10674	-2.12839	-5.49444	-5.22115
84.7008	-3.96417	-3.88743	-2.89054	-2.27999	-6.97309	-4.65664	-4.10123		-3.19247	-1.10674	-2.32742	-5.63611	-5.32652
84.8008	-4.0214	-3.82303	-2.47198	-1.99022	-6.77991	-4.39907	-4.25577		-3.45005	-1.72492	-2.39767	-5.77777	-5.24456
84.9008	-3.96417	-3.45814	-2.21441	-2.1512	-7.48823	-4.39907	-4.64213		-3.77201	-2.16279	-2.24547	-5.81641	-5.08065
85.0009	-4.22174	-3.50107	-1.79585	-2.31219	-7.42384	-3.94832	-4.73228		-3.83641	-2.31734	-2.01131	-5.72626	-4.94016
85.1009	-3.82107	-3.58692	-1.63487	-2.31219	-7.29505	-4.07711	-4.62925		-4.09398	-2.18855	-2.06985	-5.59747	-4.77625
85.2009	-4.05002	-3.56546	-1.53828	-2.76294	-6.39355	-4.33468	-4.56486		-3.57883	-2.00825	-2.08156	-5.30126	-4.72942
85.3009	-4.1645	-3.60839	-2.08562	-3.21369	-6.13598	-4.39907	-4.61637		-3.25687	-1.69916	-1.91765	-5.09521	-4.72942
85.4009	-4.07864	-3.88743	-2.15002	-3.37467	-5.42765	-4.59225	-4.56486		-3.51444	-1.44159	-2.1401	-5.01793	-4.98699
85.5009	-4.06433	-3.90889	-2.311	-3.43907	-5.55644	-4.39907	-4.46183		-3.19247	-1.72492	-2.28059	-4.88915	-5.02212
85.6009	-4.47931	-3.93035	-2.05343	-3.27808	-5.29886	-4.27029	-4.61637		-2.87051	-2.00825	-2.21034	-5.00506	-5.03382
85.7009	-4.15019	-4.20939	-2.18221	-2.82733	-5.55644	-4.01271	-4.74516		-2.9349	-2.57491	-1.92936	-5.32702	-4.77625
85.8009	-4.05002	-4.145	-1.79585	-2.66635	-5.9428	-3.81953	-4.46183		-2.74172	-2.47188	-1.90594	-5.46869	-4.8465
85.9009	-4.03571	-4.05914	-1.98903	-2.50537	-5.9428	-3.81953	-4.12698		-2.16218	-2.47188	-1.70691	-5.39141	-4.57722
86.0009	-4.00709	-4.12353	-1.79585	-2.11901	-5.49204	-4.1415	-3.95956		-2.22658	-2.05976	-1.85911	-5.46869	-4.53039
86.1009	-3.93555	-4.23086	-2.11782	-2.1512	-5.55644	-3.69075	-3.62472		-2.35536	-1.93098	-2.04643	-5.48156	-4.43672
86.2009	-3.89262	-4.18793	-2.02123	-2.34438	-5.55644	-3.24	-3.23836		-2.99929	-1.85371	-2.26888	-5.31414	-4.60063
86.3009	-3.54919	-4.40257	-1.98903	-2.34438	-5.42765	-3.75514	-2.83912		-2.9349	-1.62189	-2.4445	-5.04369	-4.41331
86.4009	-3.54919	-4.31671	-1.57048	-2.37658	-5.74962	-3.24	-2.82624		-3.19247	-1.33856	-2.72549	-5.23687	-4.64746
86.5009	-3.5635	-4.05914	-1.40949	-2.82733	-6.39355	-2.59606	-2.68458		-3.51444	-1.62189	-2.79574	-5.40429	-4.78796
86.6009	-3.80676	-3.95182	-1.18412	-2.85953	-6.58673	-2.72485	-2.60731		-3.25687	-1.77643	-2.70207	-5.13384	-4.94016
86.7009	-3.82107	-3.86596	-1.40949	-2.76294	-6.58673	-2.98242	-2.80049		-2.87051	-1.15826	-2.72549	-5.14672	-4.96358
86.8009	-4.00709	-3.56546	-1.3773	-2.89172	-6.77991	-3.04682	-2.65882		-2.74172	-1.23553	-2.79574	-5.46869	-4.98699
86.9009	-4.03571	-3.67278	-1.53828	-2.85953	-6.65112	-3.11121	-2.82624		-2.80612	-1.44159	-2.62012	-5.46869	-4.79967
87.0009	-3.80676	-3.7801	-1.69926	-2.69855	-7.10187	-3.75514	-2.852		-2.9349	-1.15826	-2.36255	-5.3399	-4.56551
87.1009	-3.57781	-3.62985	-1.66707	-2.56976	-7.03748	-3.81953	-3.08382		-3.25687	-1.15826	-2.33913	-5.43005	-4.44843
87.2009	-3.67797	-3.52253	-1.40949	-2.66635	-7.03748	-4.01271	-3.26412		-2.99929	-1.62189	-2.12839	-5.45581	-4.46014
87.3009	-3.864	-3.7801	-1.63487	-2.60196	-6.77991	-3.62635	-3.76638		-3.06369	-1.6734	-1.9879	-5.18536	-4.48355
87.4009	-3.83538	-3.67278	-1.86025	-2.89172	-6.77991	-3.56196	-3.70199		-2.67733	-1.90522	-1.91765	-4.95354	-4.37818
87.5009	-3.83538	-3.22203	-1.89244	-2.98831	-6.90869	-3.04682	-3.7535		-2.48415	-1.82795	-1.9996	-4.74748	-4.46014
87.6009	-3.79245	-3.26496	-2.08562	-3.1493	-7.10187	-3.04682	-3.38002		-1.969	-1.46735	-1.9996	-4.60582	-4.35477
87.7009	-4.20743	-3.43667	-2.50418	-3.0849	-7.42384	-2.72485	-3.05806		-1.969	-1.20977	-2.08156	-4.74748	-4.16744
87.8009	-3.99279	-3.24349	-2.05343	-2.95612	-7.68141	-2.78924	-3.22548		-2.35536	-1.46735	-2.28059	-4.69597	-4.22598
87.9009	-4.1645	-3.09324	-1.66707	-2.63415	-8.38973	-3.04682	-3.09669		-2.48415	-1.4931	-2.24547	-4.69597	-4.19086
88.0009	-4.36483	-3.24349	-1.53828	-2.2156	-7.87459	-3.49757	-2.91639		-2.29097	-1.98249	-2.08156	-4.68309	-4.07378
88.1009	-4.57948	-3.13617	-1.44169	-2.24779	-7.8102	-3.56196	-3.05806		-2.41976	-2.34309	-2.17522	-4.90203	-4.07378
88.2009	-4.3076	-3.00739	-1.28071	-2.1834	-7.7458	-3.69075	-3.19972		-2.48415	-2.42036	-2.2923	-4.52855	-3.92158
88.3009	-4.32191	-2.79274	-1.44169	-2.31219	-7.68141	-3.56196	-3.09669		-2.48415	-2.24006	-2.18693	-4.50279	-3.86304
88.4009	-4.47931	-2.96446	-1.73146	-2.2156	-7.10187	-3.24	-3.3929		-2.80612	-1.98249	-2.22205	-4.52855	-3.94499
88.5009	-4.59379	-2.8786	-2.18221	-2.69855	-7.29505	-2.78924	-3.61184		-2.61294	-1.46735	-2.47962	-4.67021	-3.90987
88.6009	-4.6081	-2.98592	-2.24661	-2.63415	-7.42384	-3.04682	-3.58608		-2.29097	-1.00372	-2.67866	-4.50279	-4.01524
88.7009	-4.67965	-2.77128	-2.18221	-2.47317	-7.29505	-2.72485	-3.30275		-2.35536	-0.900687	-2.51475	-4.70885	-4.33135
88.8009	-4.7655	-2.70688	-2.18221	-2.56976	-6.8443	-2.85364	-3.07094		-2.16218	-1.05523	-2.56158	-4.81188	-4.27281
88.9009	-4.9086	-2.77128	-1.89244	-2.63415	-6.32915	-2.72485	-2.71034		-1.969	-0.926444	-2.5967	-4.799	-4.2494
89.0009	-4.99446	-2.94299	-1.53828	-2.73074	-5.8784	-3.04682	-2.6717		-2.54854	-0.746143	-2.39767	-4.68309	-4.2494
89.1009	-5.18048	-2.64249	-1.3451	-2.85953	-5.62083	-2.40288	-2.41413		-3.12808	-1.00372	-2.17522	-4.70885	-3.99183
89.2009	-5.02308	-2.92153	-1.15192	-2.98831	-5.49204	-2.59606	-2.38837		-3.12808	-1.00372	-2.15181	-4.70885	-3.8045
89.3009	-5.13755	-3.11471	-1.3451	-2.2156	-5.42765	-2.66046	-1.73156		-2.67733	-1.00372	-1.91765	-4.68309	-3.73425
89.4009	-4.96584	-2.98592	-1.69926	-2.44097	-6.00719	-2.91803	-1.73156		-2.35536	-1.46735	-1.88252	-4.65733	-3.69913
89.5009	-4.75119	-2.85714	-1.79585	-2.11901	-6.00719	-2.66046	-1.31944		-1.90461	-2.18855	-1.92936	-4.94066	-3.76938
89.6009	-4.63672	-2.79274	-1.63487	-2.02242	-6.07158	-2.66046	-1.51262		-1.77583	-2.24006	-1.9879	-4.86339	-3.98012
89.7009	-4.72257	-2.68542	-1.47389	-2.34438	-5.68522	-2.91803	-1.53838		-1.77583	-2.57491	-2.1401	-4.72173	-4.07378
89.8009	-4.7655	-2.5781	-1.18412	-2.73074	-5.81401	-2.66046	-1.91186		-1.51825	-2.52339	-2.05814	-4.67021	-4.08549
89.9009	-4.57948	-2.79274	-1.02314	-2.37658	-5.36326	-2.98242	-1.74444		-2.16218	-2.13703	-2.23376	-4.69597	-4.12061
90.0009	-4.77981	-2.98592	-0.733367	-2.85953	-5.29886	-2.98242	-1.89898		-2.74172	-1.51886	-2.38596	-4.374	-3.9567
90.1009	-4.53655	-3.09324	-0.862153	-2.98831	-4.78372	-2.46728	-1.78308		-2.54854	-1.44159	-2.2923	-4.50279	-3.78108
90.2009	-4.55086	-3.07178	-0.926546	-2.69855	-5.23447	-1.95213	-1.43535		-2.09779	-1.15826	-2.35084	-4.54142	-3.73425
90.3009	-4.55086	-2.81421	-0.958743	-2.85953	-5.04129	-1.95213	-1.39672		-2.74172	-1.26129	-2.40938	-4.46415	-3.82792
90.4009	-4.56517	-2.40638	-0.668974	-2.98831	-5.04129	-1.63017	-1.37096		-2.35536	-1.33856	-2.15181	-4.45127	-3.81621
90.5009	-4.29329	-2.34199	-0.765564	-2.76294	-5.17008	-1.50138	-1.5255		-1.77583	-1.36432	-1.97619	-4.63158	-3.88645
90.6009	-4.53655	-2.51371	-0.862153	-2.50537	-5.8784	-2.20971	-1.62853		-1.51825	-1.08099	-1.83569	-4.54142	-3.86304
90.7009	-4.39345	-2.29906	-0.862153	-2.47317	-5.49204	-2.14531	-2.14368		-2.09779	-1.05523	-1.543	-4.46415	-3.6523
90.8009	-4.20743	-2.53517	-0.829957	-2.37658	-5.42765	-2.14531	-2.59443		-2.16218	-0.87493	-1.42592	-4.51567	-3.66401
90.9009	-4.13588	-2.36345	-1.05533	-2.31219	-5.9428	-2.46728	-2.92927		-1.84022	-1.05523	-1.27372	-4.16794	-3.57034
91.0009	-4.12157	-2.19174	-1.28071	-2.1834	-5.81401	-3.04682	-3.17397		-1.969	-1.23553	-1.35567	-4.16794	-3.57034
91.1009	-3.99279	-2.06295	-1.28071	-2.27999	-5.55644	-2.98242	-3.13533		-2.41976	-1.46735	-1.43763	-4.24522	-3.59376
91.2009	-3.94986	-2.44931	-1.44169	-2.31219	-6.20037	-3.43317	-3.08382		-2.29097	-1.75068	-1.91765	-4.33537	-3.94499
91.3009	-3.94986	-2.55663	-1.69926	-2.56976	-6.65112	-3.75514	-2.92927		-1.90461	-1.80219	-2.25718	-4.32249	-3.8045
91.4009	-4.15019	-2.83567	-1.63487	-2.73074	-6.20037	-3.75514	-2.83912		-2.41976	-1.87946	-2.51475	-4.5543	-3.69913
91.5009	-4.22174	-2.85714	-1.79585	-2.63415	-5.74962	-3.11121	-2.60731		-2.67733	-1.62189	-2.65524	-4.33537	-3.64059
91.6009	-4.10726	-2.92153	-2.02123	-3.1493	-5.10569	-2.46728	-2.55579		-2.80612	-1.75068	-3.02989	-4.03916	-3.64059
91.7009	-4.0214	-2.59956	-2.11782	-3.1171	-4.65493	-2.20971	-2.69746		-2.61294	-1.69916	-2.93623	-4.00052	-3.41814
91.8009	-4.23605	-2.19174	-1.89244	-3.02051	-4.59054	-2.40288	-2.74897		-2.9349	-1.46735	-3.01819	-3.91037	-3.30106
91.9009	-4.10726	-2.23467	-1.82805	-3.27808	-4.84811	-2.46728	-2.83912		-2.41976	-1.41583	-3.28747	-3.73007	-3.34789
92.0009	-4.17881	-2.36345	-1.50608	-3.66444	-4.9769	-2.2741	-2.77473		-2.41976	-1.72492	-3.11185	-3.73007	-3.38302
92.1009	-4.37914	-2.42785	-1.3773	-3.37467	-5.36326	-2.53167	-3.277		-2.22658	-1.39007	-2.99477	-3.96189	-3.46497
92.2009	-4.36483	-2.2776	-1.15192	-3.85762	-5.10569	-2.2741	-3.4573		-2.54854	-1.02947	-2.84257	-3.84598	-3.44156
92.3009	-4.10726	-2.74981	-0.958743	-4.0186	-4.71933	-2.01653	-3.4573		-2.35536	-1.3128	-2.51475	-3.91037	-3.5001
92.4009	-4.39345	-2.79274	-0.636777	-4.14739	-4.20418	-1.75895	-3.34139		-2.16218	-1.10674	-2.40938	-3.97477	-3.37131
92.5009	-4.17881	-2.85714	-0.733367	-4.24398	-4.011	-1.82335	-3.53457		-1.969	-0.823415	-2.52646	-3.80734	-3.34789
92.6009	-3.96417	-2.96446	-0.636777	-4.24398	-3.94661	-1.75895	-3.12245		-1.84022	-1.10674	-2.42109	-3.85886	-3.31277
92.7009	-3.93555	-3.15764	-0.411401	-4.11519	-4.39736	-2.33849	-2.82624		-1.13189	-1.15826	-2.37425	-4.0134	-3.2074
92.8009	-4.13588	-2.90006	-0.507991	-4.24398	-4.78372	-2.2741	-2.60731		-1.0675	-0.87493	-2.7372	-3.91037	-2.98495
92.9009	-3.82107	-2.74981	-0.70117	-3.98641	-5.9428	-2.2741	-2.42701		-1.58265	-1.05523	-2.71378	-3.76871	-3.17228
93.0009	-3.87831	-2.68542	-0.540188	-3.79323	-6.58673	-2.08092	-2.3111		-1.84022	-1.1325	-2.74891	-4.00052	-3.2074
93.1009	-4.06433	-2.53517	-0.507991	-3.95421	-7.03748	-2.14531	-2.24671		-2.09779	-1.08099	-2.90111	-4.02628	-3.18398
93.2009	-4.32191	-2.49224	-0.70117	-4.14739	-7.48823	-1.63017	-2.07928		-2.35536	-1.02947	-3.05331	-4.00052	-3.30106
93.3009	-4.12157	-2.2132	-0.862153	-4.27618	-8.45413	-1.50138	-2.47852		-2.48415	-1.39007	-2.91281	-4.00052	-3.62888
93.4009	-4.13588	-2.2132	-1.02314	-4.34057	-7.61702	-1.50138	-2.82624		-2.61294	-1.36432	-2.80744	-4.18082	-3.61717
93.5009	-4.1645	-2.32053	-1.11973	-4.43716	-7.48823	-2.01653	-2.54291		-2.9349	-1.44159	-3.05331	-4.11643	-3.62888
93.6009	-4.13588	-2.47078	-1.05533	-4.37277	-7.35944	-2.40288	-2.54291		-2.29097	-1.44159	-2.91281	-3.94901	-3.59376
93.7009	-3.93555	-2.17028	-0.636777	-4.17959	-7.29505	-2.08092	-2.87776		-2.74172	-1.69916	-2.7372	-4.06492	-3.42985
93.8009	-3.92124	-2.38492	-0.733367	-4.24398	-6.20037	-2.08092	-2.74897		-2.99929	-1.54462	-2.51475	-4.11643	-3.31277
93.9009	-3.59212	-2.40638	-0.733367	-4.56595	-6.32915	-2.01653	-2.62019		-2.80612	-1.26129	-2.33913	-4.0134	-3.27765
94.0009	-3.54919	-2.38492	-0.540188	-4.66254	-6.52233	-1.82335	-3.12245		-2.29097	-1.05523	-1.82399	-3.98764	-3.27765
94.1009	-3.59212	-2.44931	-0.829957	-4.69473	-6.71551	-1.82335	-3.36715		-3.06369	-0.926444	-1.66008	-4.03916	-3.26594
94.2009	-3.77814	-2.72835	-1.24851	-4.9523	-6.52233	-2.33849	-3.4573		-2.67733	-0.87493	-1.73032	-3.88461	-3.40643
94.3009	-3.82107	-2.66396	-1.18412	-5.11329	-6.65112	-2.72485	-3.79214		-2.61294	-0.643114	-1.87082	-3.89749	-3.44156
94.4009	-4.1645	-2.53517	-1.3451	-4.92011	-6.71551	-2.72485	-4.01108		-2.54854	-0.797658	-1.75374	-3.85886	-3.40643
94.5009	-3.97848	-2.29906	-1.53828	-5.11329	-6.52233	-2.85364	-3.66335		-2.9349	-0.668872	-1.67178	-3.62704	-3.2074
94.6009	-3.77814	-1.95563	-1.31291	-5.27427	-6.26476	-2.72485	-3.47017		-2.67733	-0.694629	-1.543	-3.4725	-3.17228
94.7009	-3.54919	-1.89124	-1.57048	-5.24207	-5.9428	-2.66046	-3.04518		-2.9349	-0.514328	-1.74203	-3.49826	-3.00837
94.8009	-3.66366	-1.93417	-1.3451	-5.17768	-6.26476	-2.40288	-2.59443		-2.41976	-0.565843	-1.75374	-3.48538	-2.96154
94.9009	-3.63505	-2.04149	-1.24851	-5.30647	-6.45794	-2.08092	-2.29822		-2.48415	-0.385542	-2.03473	-3.48538	-2.9147
95.001	-3.50626	-2.06295	-1.31291	-5.33866	-6.52233	-1.95213	-2.41413		-2.16218	-0.952201	-2.18693	-3.63992	-3.04349
95.101	-3.37747	-2.04149	-1.15192	-5.08109	-6.90869	-2.20971	-2.32398		-2.22658	-1.36432	-2.35084	-3.74295	-3.03178
95.201	-3.62074	-1.9127	-0.958743	-4.9523	-6.90869	-2.33849	-2.29822		-2.22658	-1.57038	-2.10497	-3.4725	-3.16057
95.301	-3.33454	-2.02002	-1.21632	-4.79132	-6.65112	-2.40288	-2.46564		-1.64704	-1.59613	-2.10497	-3.44674	-3.04349
95.401	-3.37747	-1.99856	-1.02314	-4.69473	-6.65112	-2.53167	-2.55579		-1.58265	-1.82795	-2.05814	-3.66568	-2.903
95.501	-3.59212	-1.76245	-1.02314	-4.63034	-6.8443	-2.2741	-2.41413		-1.26068	-1.80219	-1.96448	-3.73007	-2.9147
95.601	-3.69228	-1.63367	-0.926546	-4.75913	-6.39355	-2.01653	-2.29822		-1.58265	-1.41583	-2.04643	-3.71719	-2.93812
95.701	-3.36316	-1.6122	-0.958743	-4.85572	-6.39355	-1.69456	-2.25958		-1.51825	-1.59613	-2.17522	-3.8331	-2.85616
95.801	-3.36316	-1.95563	-1.08753	-5.04889	-6.71551	-1.50138	-2.14368		-2.22658	-1.75068	-2.23376	-4.05204	-2.96154
95.901	-3.27731	-1.95563	-0.89435	-5.11329	-6.77991	-2.14531	-2.05353		-2.29097	-2.03401	-2.25718	-3.6528	-3.09032
96.001	-3.37747	-2.12735	-0.347008	-4.92011	-6.39355	-2.33849	-1.87323		-2.09779	-2.08552	-2.18693	-3.74295	-2.93812
96.101	-3.46333	-2.19174	-0.475795	-4.9523	-6.39355	-2.59606	-2.0664		-1.51825	-2.24006	-2.11668	-3.67856	-2.903
96.201	-3.62074	-2.42785	-0.314812	-4.9845	-6.26476	-2.91803	-2.19519		-1.51825	-2.03401	-1.71862	-3.85886	-2.89129
96.301	-3.64936	-2.12735	0.0393505	-4.88791	-5.9428	-2.46728	-1.92474		-1.13189	-2.08552	-1.41421	-3.31796	-2.86787
96.401	-3.7209	-1.84831	-0.0250426	-4.88791	-5.68522	-2.01653	-2.16943		-0.874321	-1.80219	-1.21518	-3.38235	-2.84446
96.501	-3.57781	-1.82685	-0.379205	-4.85572	-5.42765	-2.08092	-2.59443		-1.38947	-1.59613	-1.36738	-3.18917	-2.93812
96.601	-3.46333	-1.74099	-0.540188	-4.9845	-5.23447	-2.14531	-2.64594		-1.71143	-1.80219	-1.55471	-3.16341	-3.00837
96.701	-3.44902	-1.44049	-0.347008	-5.0167	-5.81401	-2.01653	-2.60731		-1.51825	-1.82795	-1.71862	-3.02175	-3.03178
96.801	-3.23438	-1.54781	-0.443598	-5.08109	-5.42765	-2.33849	-2.64594		-1.77583	-1.85371	-1.67178	-3.38235	-3.0552
96.901	-3.04835	-1.84831	-0.636777	-4.88791	-4.52615	-2.08092	-2.23383		-2.0334	-1.90522	-1.82399	-3.49826	-3.12545
97.001	-3.14852	-1.69806	-0.507991	-4.66254	-4.33297	-2.20971	-1.87323		-1.64704	-1.95673	-1.76545	-3.34371	-3.13715
97.101	-3.07697	-1.84831	-0.475795	-4.43716	-3.81782	-2.08092	-1.71868		-1.45386	-1.64765	-1.46104	-3.30508	-2.93812
97.201	-3.01973	-1.89124	-0.829957	-4.40496	-3.43146	-2.33849	-1.75732		-1.26068	-1.59613	-1.43763	-3.26644	-2.903
97.301	-3.13421	-1.65513	-0.572384	-4.083	-3.49586	-2.59606	-1.74444		-1.64704	-1.39007	-1.28543	-2.97023	-2.903
97.401	-3.06266	-1.65513	-0.89435	-4.0508	-3.62464	-2.40288	-1.75732		-1.13189	-0.977959	-1.28543	-3.08614	-2.86787
97.501	-2.71923	-2.06295	-1.05533	-4.43716	-3.75343	-2.53167	-2.01489		-1.32507	-0.5916	-1.16835	-3.15053	-2.77421
97.601	-2.8194	-2.2132	-1.24851	-4.66254	-3.94661	-2.33849	-1.68005		-1.0675	-0.411299	-1.15664	-2.7513	-2.72738
97.701	-2.79078	-2.29906	-1.28071	-4.53375	-3.49586	-1.82335	-1.56414		-1.0675	-0.385542	-1.30884	-2.7513	-2.79763
97.801	-2.80509	-2.17028	-1.73146	-4.27618	-3.30268	-1.50138	-1.56414		-0.809928	-0.230998	-1.70691	-2.94448	-2.73909
97.901	-2.57614	-2.08442	-1.21632	-4.40496	-3.23828	-1.88774	-1.5899		-1.32507	-0.437056	-1.56641	-2.89296	-2.73909
98.001	-2.8194	-1.6122	-1.44169	-4.34057	-2.98071	-1.56577	-1.55126		-1.32507	-0.462814	-1.49617	-2.84145	-2.62201
98.101	-2.8194	-1.35463	-1.24851	-4.37277	-2.98071	-1.17942	-2.1308		-1.38947	-0.30827	-1.58983	-3.20205	-2.73909
98.201	-2.91957	-1.48342	-1.24851	-4.11519	-3.04511	-1.11502	-2.27246		-2.09779	-0.643114	-1.64837	-2.91872	-2.71567
98.301	-3.04835	-1.59074	-1.02314	-4.63034	-3.17389	-1.05063	-2.37549		-2.16218	-0.694629	-1.64837	-2.88008	-2.75079
98.401	-3.40609	-1.59074	-1.50608	-4.66254	-3.23828	-0.857449	-2.56867		-2.48415	-0.900687	-1.68349	-3.07326	-2.70396
98.501	-3.37747	-1.76245	-1.50608	-4.50155	-3.17389	-1.37259	-2.56867		-2.35536	-1.02947	-1.90594	-3.24068	-2.69225
98.601	-3.17714	-1.69806	-1.86025	-3.98641	-2.72314	-1.88774	-2.27246		-2.41976	-1.4931	-2.03473	-3.58841	-2.72738
98.701	-2.99111	-1.69806	-1.63487	-4.0508	-2.85193	-1.95213	-2.22095		-1.90461	-1.3128	-1.63666	-3.8331	-2.86787
98.801	-2.86233	-1.65513	-1.76366	-4.0186	-2.46557	-1.63017	-1.80883		-1.90461	-1.85371	-1.55471	-3.87174	-2.77421
98.901	-2.73354	-1.78392	-1.50608	-4.0508	-3.1095	-1.3082	-1.3452		-1.45386	-1.72492	-1.71862	-3.45962	-2.71567
99.001	-2.71923	-1.82685	-1.3773	-4.11519	-3.36707	-1.05063	-1.26793		-1.64704	-1.87946	-1.85911	-3.39523	-2.9147
99.101	-2.71923	-2.19174	-1.15192	-4.30837	-3.81782	-1.11502	-0.907329		-2.35536	-1.59613	-1.76545	-3.1119	-2.72738
99.201	-2.69061	-1.84831	-1.28071	-4.53375	-3.43146	-1.11502	-0.714149		-2.16218	-1.3128	-2.01131	-2.99599	-2.51664
99.301	-2.71923	-1.84831	-1.18412	-4.56595	-3.62464	-1.50138	-0.752785		-1.84022	-0.849172	-1.96448	-2.80281	-2.55176
99.401	-2.76216	-1.63367	-1.24851	-4.53375	-3.1095	-2.08092	-0.89445		-1.969	-0.565843	-1.8474	-2.88008	-2.62201
99.501	-2.69061	-1.63367	-1.3451	-5.11329	-3.56025	-1.88774	-0.482334		-1.38947	-0.514328	-1.8474	-2.82857	-2.73909
99.601	-2.73354	-1.39756	-1.11973	-5.08109	-3.94661	-2.08092	-0.765664		-0.809928	-0.746143	-1.95277	-2.82857	-2.903
99.701	-2.73354	-1.80538	-0.99094	-5.14548	-4.52615	-2.08092	-0.997479		-0.874321	-1.00372	-2.09327	-3.08614	-2.9147
99.801	-2.66199	-1.99856	-0.958743	-4.88791	-4.65493	-2.20971	-1.25505		-1.0675	-0.900687	-2.25718	-3.18917	-2.87958
99.901	-2.34718	-2.14881	-1.15192	-4.59814	-5.17008	-1.88774	-1.20354		-1.13189	-1.44159	-2.31572	-3.25356	-2.85616
100.001	-2.04668	-2.2776	-0.765564	-4.34057	-4.59054	-1.82335	-1.56414		-1.84022	-1.28705	-2.40938	-3.42098	-2.50493
100.101	-2.10392	-2.34199	-0.862153	-4.79132	-4.46175	-1.3082	-1.57702		-2.09779	-0.823415	-2.39767	-3.33083	-2.55176
100.201	-2.04668	-1.9771	-0.99094	-4.69473	-4.011	-1.88774	-1.62853		-2.09779	-0.540085	-2.23376	-3.12478	-2.57518
100.301	-2.17547	-2.08442	-0.958743	-4.82352	-4.0754	-1.69456	-1.79595		-2.48415	-0.230998	-2.19864	-2.94448	-2.39956
100.401	-2.30425	-2.23467	-0.829957	-4.88791	-3.75343	-2.08092	-1.79595		-2.35536	0.000817002	-2.06985	-2.63539	-2.37614
100.501	-2.56183	-1.93417	-1.31291	-4.34057	-4.13979	-2.53167	-1.87323		-1.77583	-0.179484	-1.88252	-2.48084	-2.54005
100.601	-2.34718	-1.9127	-1.31291	-3.98641	-3.88222	-2.53167	-2.09216		-0.874321	-0.5916	-1.73032	-2.63539	-2.41127
100.701	-2.3758	-2.12735	-1.53828	-3.95421	-3.62464	-2.08092	-2.1308		-0.874321	-1.10674	-1.85911	-2.53236	-2.36444
100.801	-2.20409	-1.56927	-1.40949	-4.0186	-3.43146	-1.95213	-2.07928		-0.745535	-1.20977	-1.75374	-2.53236	-2.64542
100.901	-2.23271	-1.39756	-0.765564	-4.14739	-3.17389	-1.75895	-2.23383		-0.487963	-1.28705	-1.70691	-2.85432	-2.64542
101.001	-2.30425	-1.82685	-0.475795	-4.50155	-2.98071	-1.17942	-2.02777		-0.938715	-1.36432	-1.81228	-2.89296	-2.62201
101.101	-2.40442	-1.63367	-0.443598	-4.53375	-3.43146	-1.3082	-1.84747		-1.26068	-1.39007	-1.70691	-2.63539	-2.46981
101.201	-2.44735	-1.63367	-0.282615	-4.53375	-3.75343	-1.56577	-1.38384		-1.71143	-0.87493	-1.73032	-2.6869	-2.54005
101.301	-2.5189	-1.78392	-0.507991	-4.50155	-3.62464	-1.95213	-1.33232		-1.32507	-1.75068	-1.70691	-2.7513	-2.51664
101.401	-2.44735	-1.65513	-1.08753	-4.50155	-3.75343	-1.82335	-1.15202		-1.77583	-1.98249	-1.82399	-2.73842	-2.38785
101.501	-2.2184	-1.50488	-1.15192	-4.30837	-3.56025	-2.14531	-0.997479		-1.84022	-1.82795	-1.68349	-2.62251	-2.23565
101.601	-2.30425	-1.9127	-1.31291	-4.11519	-3.23828	-1.63017	-1.1649		-2.16218	-2.13703	-1.8474	-2.6869	-2.36444
101.701	-2.27564	-1.9127	-1.3451	-3.98641	-2.78753	-1.50138	-1.26793		-2.09779	-2.08552	-1.6952	-2.69978	-2.23565
101.801	-2.2184	-2.14881	-1.11973	-3.79323	-2.72314	-1.24381	-1.01036		-2.48415	-1.46735	-1.57812	-2.82857	-2.10686
101.901	-2.44735	-1.9771	-1.24851	-3.79323	-2.65875	-1.17942	-1.06187		-2.09779	-1.28705	-1.46104	-2.85432	-2.25906
102.001	-2.64768	-1.99856	-1.47389	-4.0186	-2.65875	-0.986236	-1.30657		-2.41976	-1.72492	-1.29713	-2.66115	-2.29419
102.101	-2.83371	-1.9771	-1.31291	-4.40496	-2.1436	-1.05063	-1.1649		-2.16218	-1.10674	-1.37909	-2.53236	-2.32931
102.201	-2.84802	-1.86977	-1.31291	-4.69473	-2.33678	-0.857449	-1.42247		-2.0334	-1.4931	-1.35567	-2.46797	-2.34102
102.301	-2.71923	-1.74099	-1.3773	-4.79132	-2.1436	-1.11502	-1.7058		-1.90461	-1.41583	-1.56641	-2.48084	-2.29419
102.401	-2.69061	-1.82685	-1.24851	-4.66254	-2.1436	-1.11502	-1.38384		-2.29097	-1.44159	-1.60154	-2.36494	-2.23565
102.501	-2.60476	-1.84831	-1.21632	-4.53375	-1.82164	-0.921843	-1.31944		-1.71143	-1.26129	-1.82399	-2.6869	-2.20053
102.601	-2.28994	-1.6122	-1.21632	-4.46936	-1.88603	-1.11502	-1.33232		-2.0334	-1.39007	-1.75374	-2.77705	-2.06003
102.701	-2.23271	-1.89124	-0.862153	-4.50155	-1.75724	-1.17942	-1.02324		-2.09779	-1.20977	-1.82399	-2.88008	-2.08345
102.801	-2.33287	-2.02002	-0.668974	-4.69473	-1.30649	-0.857449	-1.08763		-2.16218	-1.57038	-1.74203	-2.73842	-2.37614
102.901	-2.20409	-2.29906	-0.507991	-4.85572	-0.66256	-0.857449	-1.57702		-2.16218	-1.69916	-1.82399	-2.69978	-2.36444
103.001	-2.23271	-2.42785	-0.218222	-4.9523	-0.726953	-1.43699	-1.60277		-2.09779	-1.46735	-1.48446	-2.62251	-2.55176
103.101	-2.24702	-2.40638	-0.0894358	-5.24207	-0.533774	-1.50138	-1.48687		-1.969	-1.51886	-1.36738	-2.53236	-2.66884
103.201	-2.54752	-2.2132	-0.153829	-5.17768	-0.984525	-1.50138	-1.5899		-1.90461	-1.6734	-1.32055	-2.53236	-2.77421
103.301	-2.61907	-2.2132	-0.475795	-4.88791	-1.37088	-1.63017	-1.46111		-1.90461	-1.44159	-1.12152	-2.63539	-2.43468
103.401	-2.56183	-1.99856	-0.636777	-4.79132	-1.62846	-1.75895	-1.5255		-1.90461	-1.62189	-1.01614	-2.49372	-2.37614
103.501	-2.63337	-1.65513	-0.829957	-4.63034	-1.82164	-1.43699	-1.71868		-2.09779	-1.62189	-1.08639	-2.41645	-2.24736
103.601	-2.66199	-1.80538	-1.18412	-4.43716	-2.1436	-1.75895	-2.04065		-2.35536	-1.90522	-1.19176	-2.53236	-2.08345
103.701	-2.34718	-1.69806	-1.57048	-4.46936	-2.1436	-1.88774	-2.14368		-2.16218	-2.00825	-1.34396	-2.49372	-2.0132
103.801	-2.14685	-1.50488	-1.57048	-4.66254	-2.59435	-1.82335	-2.14368		-2.0334	-2.62642	-1.66008	-2.42933	-2.1654
103.901	-2.0753	-1.67659	-1.47389	-4.72693	-2.91632	-1.69456	-2.07928		-1.77583	-2.26582	-1.74203	-2.40357	-2.28248
104.001	-2.04668	-1.82685	-1.3773	-4.79132	-2.72314	-1.37259	-1.96338		-1.51825	-2.31734	-1.8474	-2.15888	-2.43468
104.101	-2.0753	-1.69806	-1.18412	-4.85572	-2.91632	-0.599877	-1.69292		-1.45386	-2.18855	-1.8474	-2.27479	-2.56347
104.201	-2.08961	-1.74099	-0.79776	-5.04889	-3.17389	-0.0203388	-1.9505		-1.38947	-2.05976	-1.6952	-2.10736	-2.50493
104.301	-2.33287	-1.80538	-0.79776	-5.08109	-3.49586	-0.277911	-2.18231		-1.32507	-2.11128	-1.37909	-1.95282	-2.36444
104.401	-2.49028	-1.56927	-0.79776	-5.14548	-3.94661	-0.213518	-2.46564		-1.13189	-2.05976	-1.2503	-2.10736	-2.20053
104.501	-2.54752	-1.59074	-0.668974	-5.04889	-4.20418	-0.213518	-2.4914		-1.26068	-2.44612	-1.35567	-2.22327	-1.98978
104.601	-2.36149	-1.67659	-0.99094	-5.14548	-4.0754	-0.66427	-2.87776		-1.13189	-2.884	-1.18005	-1.95282	-1.98978
104.701	-2.36149	-1.84831	-1.05533	-4.9523	-3.68904	-1.05063	-2.73609		-1.32507	-3.09005	-1.02785	-2.21039	-1.97808
104.801	-2.17547	-1.74099	-1.18412	-4.92011	-3.56025	-0.793056	-2.80049		-1.32507	-2.49764	-1.18005	-2.36494	-1.95466
104.901	-2.11823	-1.69806	-1.50608	-5.11329	-3.49586	-0.857449	-2.51716		-1.38947	-2.26582	-1.19176	-2.18464	-2.11857
105.001	-1.97513	-1.59074	-1.73146	-5.37086	-4.0754	-0.986236	-2.50428		-1.969	-1.51886	-0.992729	-2.30054	-2.15369
105.101	-2.00375	-1.74099	-1.3451	-4.85572	-4.0754	-1.05063	-2.32398		-1.64704	-0.926444	-0.945898	-2.27479	-2.15369
105.201	-1.93221	-1.6122	-1.47389	-4.85572	-4.33297	-1.3082	-2.27246		-1.00311	-0.359784	-0.969313	-2.10736	-2.23565
105.301	-1.97513	-2.06295	-0.926546	-4.9523	-4.011	-1.56577	-1.87323		-1.32507	-0.437056	-0.887358	-2.18464	-2.23565
105.401	-1.86066	-2.19174	-0.443598	-4.79132	-3.17389	-1.37259	-1.7702		-1.51825	-0.617357	-0.981021	-2.26191	-2.11857
105.501	-1.9179	-2.04149	-0.218222	-4.63034	-2.46557	-1.17942	-2.11792		-1.0675	-1.18402	-1.03956	-2.36494	-2.18882
105.601	-2.01806	-1.71952	-0.443598	-4.63034	-2.52996	-1.56577	-2.20807		-0.874321	-1.15826	-1.29713	-2.35206	-2.11857
105.701	-2.2184	-1.82685	-0.572384	-4.40496	-2.01482	-1.37259	-2.55579		-1.64704	-1.33856	-1.3908	-2.18464	-1.95466
105.801	-2.00375	-1.69806	-1.05533	-4.34057	-1.88603	-0.921843	-3.00654		-1.19629	-1.23553	-1.53129	-2.10736	-2.03662
105.901	-2.2184	-1.9771	-1.15192	-4.46936	-2.27239	-1.17942	-3.53457		-1.38947	-1.3128	-1.4025	-2.17176	-2.0132
106.001	-2.18978	-2.38492	-1.31291	-4.30837	-2.1436	-1.3082	-3.31563		-1.38947	-1.08099	-1.34396	-2.04297	-1.96637
106.101	-2.24702	-2.38492	-1.15192	-4.56595	-2.20799	-0.471091	-3.22548		-1.58265	-0.823415	-1.2503	-1.95282	-2.04832
106.201	-2.2184	-2.2776	-0.958743	-4.92011	-2.07921	-0.342304	-2.83912		-1.32507	-1.00372	-1.22689	-2.01721	-2.13028
106.301	-2.26133	-2.02002	-0.733367	-4.82352	-2.07921	-0.342304	-2.65882		-1.77583	-0.797658	-0.969313	-1.9657	-2.17711
106.401	-2.14685	-1.99856	-0.765564	-4.50155	-1.95042	-0.277911	-2.40125		-0.938715	-0.565843	-1.08639	-1.95282	-2.22394
106.501	-2.14685	-1.71952	-0.411401	-4.40496	-2.1436	-0.0847319	-2.50428		-0.874321	-0.720386	-1.12152	-1.99146	-2.39956
106.601	-1.86066	-2.06295	-0.347008	-4.14739	-2.1436	-0.277911	-2.51716		-0.809928	-1.08099	-1.12152	-2.06873	-2.35273
106.701	-1.44568	-2.17028	-0.153829	-3.79323	-2.33678	-0.342304	-2.81337		-1.19629	-0.952201	-1.28542	-2.18464	-2.24736
106.801	-1.50292	-2.2132	0.0393505	-3.72884	-2.52996	-0.471091	-2.68458		-0.616749	-0.900687	-1.46104	-2.13312	-2.10686
106.901	-1.45999	-2.25613	0.0393505	-3.95421	-2.78753	-0.342304	-2.71034		-1.45386	-1.18402	-1.46104	-1.9657	-2.14199
107.001	-1.35982	-2.38492	0.00715393	-4.083	-2.52996	-0.728663	-2.58155		-1.32507	-1.00372	-1.56641	-1.72101	-1.91954
107.101	-1.56016	-2.19174	-0.0894358	-4.40496	-2.40117	-1.24381	-2.55579		-1.969	-0.771901	-1.63666	-1.88843	-1.861
107.201	-1.81773	-2.34199	-0.250419	-4.59814	-2.33678	-1.11502	-2.58155		-1.71143	-0.87493	-1.80057	-1.92706	-1.93125
107.301	-1.76049	-2.12735	-0.475795	-4.63034	-2.07921	-1.3082	-2.96791		-2.0334	-1.20977	-1.97619	-1.66949	-2.06003
107.401	-1.84635	-1.9127	-0.314812	-4.46936	-1.82164	-1.3082	-3.04518		-2.09779	-1.00372	-1.94106	-1.61798	-1.90783
107.501	-2.03237	-1.86977	-0.411401	-4.72693	-2.33678	-1.3082	-3.17397		-1.77583	-1.08099	-1.90594	-1.97858	-1.90783
107.601	-1.83204	-1.63367	-0.572384	-4.21178	-2.52996	-1.43699	-3.44442		-1.77583	-1.28705	-1.81228	-2.03009	-1.90783
107.701	-1.71756	-1.48342	-0.540188	-3.92201	-2.85193	-1.56577	-3.3929		-1.51825	-1.46735	-1.85911	-2.19751	-1.94295
107.801	-1.78911	-1.6122	-0.475795	-3.63225	-2.72314	-1.56577	-3.35427		-1.77583	-1.75068	-1.77715	-2.53236	-1.88441
107.901	-1.87497	-1.48342	-0.347008	-3.66444	-2.72314	-1.56577	-3.59896		-1.26068	-2.47188	-1.96448	-2.84145	-2.11857
108.001	-1.60308	-1.54781	-0.668974	-3.50346	-2.65875	-1.50138	-3.70199		-1.45386	-2.29158	-2.31572	-2.62251	-2.17711
108.101	-1.83204	-1.52634	-0.475795	-3.95421	-2.72314	-0.793056	-3.3929		-0.294783	-1.93098	-2.4445	-2.39069	-2.21223
[truncated: 928 more rows]
[truncated: 2 more columns]
